# Supplementary material
Source: publisher site journal article supplement (https://www.dovepress.com/article/325339)
Supplement: Supplementary file 1 [file get_supplementary_file.php]

**Supplementary Material**

Supplementary Table 1 | Differentially expressed genes in GSE84796.

Supplementary Table 2 | Differentially expressed genes in GSE95849.

Supplementary Table 3 | Overlap DEGs PPI.

Supplementary Table 1 | Differentially expressed genes in GSE84796

| adj.P.Val | t | B | logFC | GENE_SYMBOL |
| --- | --- | --- | --- | --- |
| 5.72E-08 | 13.12594 | 15.272041 | 9.3527332 | IGLL5 |
| 3.85E-08 | 13.82936 | 16.114003 | 7.8225719 | SCML4 |
| 2.77E-08 | 14.28215 | 16.63314 | 7.1700058 | LOC96610 |
| 2.07E-08 | 15.55316 | 18.002016 | 7.0467008 | IGLL1 |
| 6.84E-07 | 10.66657 | 11.946066 | 6.7202013 | POU2AF1 |
| 1.38E-07 | 12.05481 | 13.900798 | 6.6000016 | MZB1 |
| 3.85E-08 | 13.83583 | 16.121536 | 6.4021769 | LOC100653210 |
| 8.89E-07 | 10.43833 | 11.603798 | 6.2834279 | CCL5 |
| 1.66E-08 | 15.90982 | 18.364215 | 6.183125 | IGJ |
| 1.25E-07 | 12.19722 | 14.089651 | 6.1444687 | LOC100128420 |
| 6.47E-08 | 12.86958 | 14.953961 | 6.1234204 | GZMH |
| 5.72E-08 | 13.05611 | 15.186004 | 6.0890868 | ZNF683 |
| 5.72E-08 | 13.05519 | 15.184864 | 6.0100721 | FCRL5 |
| 2.41E-05 | 8.131027 | 7.77262 | 6.0011819 | CXCL9 |
| 2.12E-08 | 14.69242 | 17.08885 | 5.9313599 | LINC00426 |
| 2.41E-02 | 3.702007 | -1.482128 | 5.7465745 | XLOC_008185 |
| 8.93E-07 | 10.43098 | 11.592681 | 5.6359823 | IL7R |
| 4.74E-07 | 10.92394 | 12.324677 | 5.6255995 | XLOC_014192 |
| 2.60E-06 | 9.629609 | 10.339971 | 5.6182328 | CD8B |
| 1.41E-06 | 10.0834 | 11.059116 | 5.5151092 | CXCR6 |
| 2.31E-06 | 9.717173 | 10.480764 | 5.4488004 | PBX4 |
| 7.14E-05 | 7.427482 | 6.459899 | 5.4396248 | LGALS2 |
| 9.78E-08 | 12.44525 | 14.413664 | 5.3625471 | SKAP1 |
| 8.89E-07 | 10.44331 | 11.611336 | 5.3558302 | SLAMF7 |
| 2.82E-03 | -5.17282 | 1.798187 | -5.3535694 | LOC285556 |
| 4.46E-07 | 11.02192 | 12.466817 | 5.3458484 | CD96 |
| 2.00E-07 | 11.69893 | 13.419674 | 5.3345691 | CD6 |
| 5.43E-08 | 13.22301 | 15.390882 | 5.3257295 | GFI1 |
| 8.30E-07 | 10.49848 | 11.694602 | 5.3238249 | MIAT |
| 3.90E-07 | 11.1506 | 12.651841 | 5.2658 | CXCR3 |
| 3.15E-02 | -3.51202 | -1.901995 | -5.2432822 | ELF3 |
| 2.10E-06 | 9.787665 | 10.593397 | 5.2430456 | CD40LG |
| 7.91E-07 | 10.5341 | 11.748169 | 5.2368171 | CD2 |
| 4.58E-07 | 10.98326 | 12.410861 | 5.2230828 | ZNF831 |
| 6.66E-05 | 7.474117 | 6.549092 | 5.2190265 | LOC401847 |
| 4.66E-08 | 13.42272 | 15.632681 | 5.2020601 | RHOH |
| 2.89E-07 | 11.38316 | 12.981517 | 5.1799344 | KLRC1 |
| 1.54E-05 | 8.429508 | 8.308426 | 5.0907052 | AIM2 |
| 1.25E-07 | 12.1908 | 14.081177 | 5.0574586 | CD3G |
| 1.38E-07 | 12.06011 | 13.907855 | 5.039867 | THEMIS |
| 2.09E-06 | 9.793663 | 10.602952 | 5.0283874 | AMPD1 |
| 5.76E-08 | 13.00456 | 15.1222 | 5.0270476 | ITGAL |
| 1.03E-04 | 7.194038 | 6.008768 | 4.986993 | GZMK |
| 2.14E-04 | 6.761757 | 5.153037 | 4.9663151 | UBD |
| 9.15E-08 | 12.55745 | 14.558226 | 4.9620741 | ITK |
| 2.41E-07 | 11.54585 | 13.208615 | 4.94227 | TRAF3IP3 |
| 9.87E-07 | 10.35703 | 11.480386 | 4.9362907 | CD69 |
| 2.25E-08 | 14.51696 | 16.895628 | 4.9226465 | TBC1D10C |
| 1.24E-07 | 12.21499 | 14.113062 | 4.8898296 | FBXL16 |
| 3.63E-06 | 9.378958 | 9.931488 | 4.8574355 | MEI1 |
| 1.23E-06 | 10.18754 | 11.220516 | 4.8324663 | CCL4 |
| 1.06E-06 | 10.29892 | 11.391688 | 4.7977375 | CRTAM |
| 5.76E-08 | 13.0124 | 15.131926 | 4.7789318 | EOMES |
| 2.77E-06 | 9.565018 | 10.235486 | 4.7435548 | PRDM1 |
| 1.67E-06 | 9.965145 | 10.874199 | 4.6833306 | CD48 |
| 4.46E-07 | 11.02066 | 12.465001 | 4.6445985 | CD8A |
| 1.10E-04 | 7.157588 | 5.937628 | 4.6263275 | GZMA |
| 2.25E-08 | 14.55916 | 16.942323 | 4.6113284 | FCRL6 |
| 4.00E-02 | -3.34554 | -2.266291 | -4.605292 | NCRNA00185 |
| 1.63E-07 | 11.89262 | 13.68317 | 4.5886743 | MCOLN2 |
| 1.68E-05 | 8.351927 | 8.170357 | 4.54088 | PNOC |
| 2.09E-06 | 9.803984 | 10.619383 | 4.5365295 | KIAA0125 |
| 8.87E-08 | 12.60708 | 14.621788 | 4.5187666 | SAMD3 |
| 9.82E-08 | 12.43046 | 14.394522 | 4.5129721 | UBASH3A |
| 6.17E-07 | 10.73924 | 12.05375 | 4.4609448 | ZBP1 |
| 2.52E-06 | 9.653482 | 10.378454 | 4.4490036 | AOAH |
| 2.28E-07 | 11.59823 | 13.28112 | 4.4362022 | GPR171 |
| 5.72E-08 | 13.08798 | 15.225326 | 4.4243991 | CTSW |
| 4.34E-06 | 9.266208 | 9.745071 | 4.4209961 | IL2RB |
| 4.17E-05 | 7.775087 | 7.117269 | 4.3626863 | CD5 |
| 3.19E-05 | 7.93849 | 7.420351 | 4.3209408 | XCL1 |
| 2.43E-07 | 11.53025 | 13.186957 | 4.2806799 | AMICA1 |
| 5.26E-05 | 7.621275 | 6.828511 | 4.2789335 | RGS1 |
| 1.67E-05 | 8.362175 | 8.188643 | 4.2533247 | SMPD3 |
| 1.82E-05 | 8.303688 | 8.084084 | 4.2497728 | HSH2D |
| 6.44E-06 | 8.993758 | 9.287662 | 4.2295425 | TRAT1 |
| 7.45E-06 | 8.888274 | 9.107898 | 4.2135511 | CCL17 |
| 8.06E-05 | 7.354659 | 6.319999 | 4.2120215 | TNFRSF17 |
| 2.63E-03 | 5.218093 | 1.89767 | 4.1999353 | CXCR2P1 |
| 2.74E-06 | 9.5811 | 10.26155 | 4.197361 | RUNX3 |
| 1.28E-06 | 10.15943 | 11.177087 | 4.1645863 | CD247 |
| 1.66E-05 | 8.369168 | 8.201114 | 4.1634392 | TAGAP |
| 5.43E-08 | 13.22197 | 15.389609 | 4.1547475 | KLRC4 |
| 4.67E-07 | 10.9398 | 12.347764 | 4.1463413 | FASLG |
| 4.77E-05 | 7.689954 | 6.957861 | 4.1438409 | KLRB1 |
| 4.86E-06 | 9.183128 | 9.606637 | 4.138538 | LAX1 |
| 7.17E-07 | 10.6308 | 11.892826 | 4.1284694 | C8orf80 |
| 1.65E-05 | 8.37616 | 8.213573 | 4.1242487 | GBP5 |
| 4.60E-07 | 10.96218 | 12.380284 | 4.1222921 | IKZF1 |
| 1.34E-04 | 7.042483 | 5.711747 | 4.0794328 | TIFAB |
| 2.55E-07 | 11.48885 | 13.129375 | 4.0741345 | JAKMIP1 |
| 3.24E-07 | 11.28986 | 12.84997 | 4.0701397 | PRKCQ |
| 3.48E-06 | 9.407826 | 9.97895 | 4.065842 | PTPN22 |
| 1.51E-06 | 10.03608 | 10.985319 | 4.062239 | CXorf65 |
| 9.78E-08 | 12.45193 | 14.422301 | 4.0588319 | TMC8 |
| 1.27E-07 | 12.16397 | 14.045738 | 4.0499436 | ZAP70 |
| 2.16E-06 | 9.760868 | 10.550656 | 4.0446726 | KLRD1 |
| 4.43E-07 | 11.03797 | 12.490005 | 4.0358717 | TBX21 |
| 6.17E-03 | 4.630635 | 0.595133 | 4.0125771 | CCL19 |
| 1.30E-06 | 10.14173 | 11.149685 | 4.0046284 | PVRIG |
| 7.84E-04 | -5.9627 | 3.504093 | -3.9880484 | BMP7 |
| 3.70E-05 | 7.847366 | 7.251801 | 3.974529 | C2 |
| 1.15E-06 | 10.24707 | 11.312189 | 3.9718108 | IL21R |
| 4.58E-07 | 10.98338 | 12.411036 | 3.9672841 | SLAMF6 |
| 1.16E-06 | 10.23548 | 11.294384 | 3.9611974 | ACAP1 |
| 2.41E-06 | 9.686582 | 10.431688 | 3.9166668 | PTPRCAP |
| 2.09E-06 | 9.807098 | 10.624336 | 3.9117585 | CXCR4 |
| 7.43E-07 | 10.5873 | 11.827884 | 3.8946074 | IL2RG |
| 3.24E-06 | 9.453549 | 10.053901 | 3.8929665 | CD27 |
| 2.89E-06 | 9.536892 | 10.189819 | 3.8883539 | PTPN7 |
| 4.83E-06 | 9.190057 | 9.618218 | 3.8866083 | RAB39B |
| 8.74E-05 | 7.303093 | 6.22048 | 3.88429 | FYB |
| 6.77E-05 | 7.463702 | 6.529199 | 3.8813664 | FCN1 |
| 5.49E-07 | 10.82213 | 12.17583 | 3.8797692 | STYK1 |
| 7.76E-03 | 4.48156 | 0.261609 | 3.8782786 | CXCL11 |
| 2.80E-04 | 6.600135 | 4.8264 | 3.8774381 | NCF1 |
| 2.23E-04 | 6.738759 | 5.106778 | 3.877318 | CCR7 |
| 4.24E-06 | 9.283121 | 9.773142 | 3.8747776 | TARP |
| 2.93E-07 | 11.36643 | 12.958001 | 3.862995 | KLRC3 |
| 2.09E-06 | 9.798028 | 10.609903 | 3.8619834 | KLRK1 |
| 6.34E-06 | 9.006796 | 9.309777 | 3.84241 | ITGA4 |
| 8.48E-03 | 4.420329 | 0.124431 | 3.835818 | CXCL10 |
| 1.78E-06 | 9.921162 | 10.804979 | 3.8304661 | LOC100505585 |
| 5.96E-05 | 7.542754 | 6.679801 | 3.8163402 | RGL4 |
| 2.20E-05 | 8.18709 | 7.874211 | 3.8149347 | IKZF3 |
| 3.40E-03 | 5.050333 | 1.528189 | 3.8124954 | LAMP3 |
| 6.83E-04 | 6.050993 | 3.690371 | 3.7990953 | ITGAD |
| 8.73E-06 | 8.791526 | 8.941696 | 3.7774264 | BCL11B |
| 7.67E-07 | 10.55992 | 11.786897 | 3.7666989 | MATK |
| 1.86E-04 | 6.843416 | 5.316693 | 3.7665132 | LOC100130811 |
| 9.73E-05 | 7.236523 | 6.091445 | 3.7556228 | SLAMF8 |
| 7.24E-05 | 7.416664 | 6.439163 | 3.7535393 | CCR5 |
| 1.13E-04 | 7.142027 | 5.907202 | 3.7363327 | BATF |
| 1.16E-05 | -8.5979 | 8.605241 | -3.7308209 | D4S234E |
| 1.00E-05 | 8.700691 | 8.784493 | 3.7216045 | SIT1 |
| 3.24E-06 | 9.455578 | 10.057221 | 3.7201034 | DEF6 |
| 1.28E-06 | 10.15283 | 11.166864 | 3.7189737 | SH2D3A |
| 2.50E-06 | 9.661824 | 10.391883 | 3.7129039 | LAG3 |
| 6.77E-05 | 7.462214 | 6.526356 | 3.6915693 | CCR2 |
| 8.61E-07 | 10.46927 | 11.650555 | 3.6626008 | LY9 |
| 5.06E-05 | 7.652179 | 6.886799 | 3.6617356 | LOC439949 |
| 1.79E-07 | 11.80115 | 13.559234 | 3.6337262 | NKG7 |
| 8.11E-05 | 7.348053 | 6.307272 | 3.6245872 | BLK |
| 5.24E-04 | 6.204713 | 4.012355 | 3.6224735 | NCR3 |
| 1.44E-03 | -5.58723 | 2.70152 | -3.6182641 | PCDH20 |
| 2.80E-05 | 8.02327 | 7.576111 | 3.6032836 | CLNK |
| 4.72E-05 | 7.697862 | 6.972711 | 3.5997901 | CD84 |
| 1.88E-06 | 9.884431 | 10.746987 | 3.5968292 | CYTIP |
| 1.22E-06 | 10.19769 | 11.23618 | 3.5585494 | MAP4K1 |
| 3.51E-04 | 6.456505 | 4.533131 | 3.5558098 | FAM26F |
| 1.61E-03 | 5.513669 | 2.542433 | 3.5518896 | APBA2 |
| 2.91E-06 | 9.528747 | 10.176576 | 3.5409979 | SH2D1A |
| 4.88E-06 | 9.177718 | 9.597591 | 3.5237813 | CD244 |
| 2.44E-05 | 8.119296 | 7.751307 | 3.5194787 | MYB |
| 2.64E-05 | 8.069038 | 7.659775 | 3.5179574 | BIN2 |
| 3.33E-04 | 6.490807 | 4.603424 | 3.4848754 | C16orf54 |
| 3.33E-05 | 7.913001 | 7.373322 | 3.4718408 | PTPRC |
| 8.31E-04 | 5.920666 | 3.415065 | 3.4674175 | C5orf20 |
| 8.73E-06 | 8.78887 | 8.937115 | 3.4663894 | LOC606724 |
| 1.69E-05 | 8.344971 | 8.157936 | 3.4516742 | LCK |
| 2.28E-05 | -8.16359 | 7.831686 | -3.447762 | AGXT2L1 |
| 9.96E-03 | 4.310775 | -0.121168 | 3.4419768 | JSRP1 |
| 1.78E-04 | 6.872236 | 5.374231 | 3.4324247 | CD52 |
| 6.99E-04 | 6.032401 | 3.651224 | 3.4167923 | CTLA4 |
| 2.25E-05 | 8.173577 | 7.849764 | 3.4154405 | CST7 |
| 5.52E-05 | 7.589461 | 6.768365 | 3.4060545 | DOCK2 |
| 5.52E-05 | 7.58834 | 6.766244 | 3.4012182 | TXNDC3 |
| 9.04E-04 | 5.868602 | 3.304505 | 3.3401935 | NRK |
| 3.52E-05 | 7.879469 | 7.311316 | 3.3282566 | PRKCB |
| 1.01E-03 | 5.798134 | 3.154348 | 3.3233973 | PENK |
| 1.59E-05 | 8.405352 | 8.265526 | 3.3177295 | EVI2B |
| 1.58E-05 | 8.411013 | 8.275588 | 3.3157985 | PYHIN1 |
| 1.07E-04 | 7.173122 | 5.96797 | 3.2991404 | RGS9 |
| 8.62E-04 | 5.898402 | 3.367828 | 3.2984094 | FER1L4 |
| 2.05E-05 | 8.226942 | 7.946157 | 3.2962774 | HCST |
| 6.79E-05 | 7.459104 | 6.520412 | 3.2866399 | SNX10 |
| 6.09E-04 | 6.11868 | 3.832519 | 3.2860928 | LOC100128670 |
| 3.01E-04 | 6.555246 | 4.735044 | 3.2838052 | PPP2R2B |
| 8.72E-04 | 5.889683 | 3.34931 | 3.2788092 | LOC283710 |
| 5.09E-04 | 6.22366 | 4.051831 | 3.277338 | SIGLEC10 |
| 9.69E-05 | 7.241884 | 6.101861 | 3.2762543 | DPEP2 |
| 2.60E-05 | 8.080653 | 7.68096 | 3.263511 | CD37 |
| 3.95E-04 | 6.385792 | 4.387723 | 3.2516075 | NELL2 |
| 2.00E-05 | 8.244055 | 7.976985 | 3.2250336 | SIRPG |
| 6.93E-03 | 4.555923 | 0.428074 | 3.2212165 | ANKRD22 |
| 4.45E-02 | -3.2668 | -2.437094 | -3.1976957 | DHRS7C |
| 1.40E-03 | 5.601829 | 2.733031 | 3.1946318 | LEF1 |
| 9.20E-05 | 7.275162 | 6.166419 | 3.1914001 | ZBTB32 |
| 2.04E-03 | -5.36826 | 2.226303 | -3.1881342 | LRRC38 |
| 1.90E-03 | 5.412511 | 2.322734 | 3.1790772 | SIGLECP3 |
| 2.94E-04 | 6.570152 | 4.765412 | 3.1700507 | CD7 |
| 1.38E-03 | 5.612548 | 2.756148 | 3.1608371 | TNFSF14 |
| 1.12E-02 | 4.229497 | -0.303431 | 3.1545862 | FCRL3 |
| 5.00E-04 | 6.233782 | 4.072901 | 3.1409031 | SEMA4D |
| 1.25E-02 | 4.153337 | -0.47419 | 3.1139097 | NAP1L3 |
| 5.57E-03 | -4.70377 | 0.758444 | -3.113031 | CGA |
| 3.73E-04 | 6.420541 | 4.459261 | 3.1069988 | BTLA |
| 1.60E-02 | -3.98549 | -0.850136 | -3.1053393 | NR4A3 |
| 5.57E-03 | 4.701173 | 0.752646 | 3.1050028 | MXRA5 |
| 9.83E-06 | 8.713107 | 8.806047 | 3.0989665 | DENND1C |
| 4.55E-03 | 4.844026 | 1.070871 | 3.0969115 | LTB |
| 1.50E-03 | 5.56082 | 2.644476 | 3.0952551 | C21orf96 |
| 1.23E-02 | 4.165498 | -0.446928 | 3.0906348 | GRM1 |
| 1.07E-05 | 8.659098 | 8.712134 | 3.0880364 | EXOC3L4 |
| 2.37E-03 | -5.28146 | 2.036611 | -3.0866408 | SCGB1D2 |
| 2.52E-04 | 6.662972 | 4.95382 | 3.0601243 | ASCL2 |
| 6.10E-03 | 4.637461 | 0.610385 | 3.0594188 | SFRP4 |
| 4.30E-03 | 4.884653 | 1.161157 | 3.0437236 | PLA2G7 |
| 3.67E-03 | 4.991239 | 1.397503 | 3.0407498 | CD19 |
| 8.24E-04 | -5.92956 | 3.433911 | -3.0382991 | SCGB1D1 |
| 1.26E-03 | 5.673765 | 2.887927 | 3.033809 | KLHDC7B |
| 9.73E-04 | -5.81752 | 3.195724 | -3.0322544 | EDN2 |
| 3.30E-04 | 6.49566 | 4.613355 | 3.0297967 | CD53 |
| 1.60E-03 | 5.521334 | 2.559039 | 3.0228147 | SELL |
| 2.41E-03 | 5.273421 | 2.018997 | 3.0223097 | NCKAP1L |
| 2.42E-03 | 5.268727 | 2.008713 | 3.0115691 | LOC100129322 |
| 1.54E-03 | 5.542455 | 2.60476 | 2.9869381 | ARHGAP30 |
| 3.56E-03 | 5.016828 | 1.454126 | 2.9840449 | SP140 |
| 3.00E-03 | -5.13061 | 1.70529 | -2.9833231 | RRAD |
| 3.25E-04 | 6.506023 | 4.634553 | 2.9802643 | CLEC4D |
| 4.80E-04 | 6.264499 | 4.136763 | 2.9799821 | GALNT6 |
| 3.17E-05 | 7.944252 | 7.43097 | 2.9706487 | BTK |
| 7.78E-03 | -4.47934 | 0.256635 | -2.9677806 | KCNA7 |
| 1.79E-04 | 6.867908 | 5.365598 | 2.9666015 | SLA |
| 9.23E-04 | -5.85635 | 3.278434 | -2.9646634 | CDCA2 |
| 3.06E-04 | 6.541868 | 4.707765 | 2.9630764 | GVINP1 |
| 2.14E-04 | 6.76257 | 5.15467 | 2.955744 | NLRC3 |
| 8.25E-04 | 5.928467 | 3.431602 | 2.9527365 | DAPP1 |
| 1.26E-03 | 5.673161 | 2.886629 | 2.950874 | MYO1G |
| 9.76E-05 | 7.233494 | 6.085559 | 2.9454966 | HMHA1 |
| 2.70E-04 | 6.62155 | 4.869887 | 2.9288918 | BLNK |
| 1.01E-04 | 7.20949 | 6.038867 | 2.9285062 | RTN1 |
| 6.79E-04 | 6.056291 | 3.701518 | 2.9119194 | LCP1 |
| 3.16E-04 | 6.523112 | 4.669479 | 2.9095183 | APOBEC3H |
| 7.67E-04 | 5.973947 | 3.527871 | 2.9024879 | BHLHE22 |
| 5.61E-04 | 6.167452 | 3.934585 | 2.9007718 | WDFY4 |
| 1.63E-04 | 6.929984 | 5.489173 | 2.8966687 | PIM2 |
| 2.94E-03 | 5.148732 | 1.745192 | 2.8922018 | SAMSN1 |
| 2.26E-04 | 6.725078 | 5.079225 | 2.8811995 | RGS18 |
| 1.62E-05 | 8.390828 | 8.239693 | 2.8757273 | CARD11 |
| 4.28E-04 | 6.331445 | 4.275518 | 2.8724087 | SASH3 |
| 4.32E-04 | 6.324535 | 4.261222 | 2.870611 | ACP5 |
| 9.18E-06 | 8.754848 | 8.878356 | 2.8649061 | CD3E |
| 2.74E-06 | 9.585539 | 10.268739 | 2.8647786 | ITGB7 |
| 2.58E-05 | 8.086574 | 7.691751 | 2.8638625 | GZMB |
| 1.87E-03 | 5.421663 | 2.342652 | 2.8627188 | CD72 |
| 1.68E-02 | 3.949102 | -0.931505 | 2.8603934 | MMP9 |
| 6.73E-04 | 6.061634 | 3.712755 | 2.86012 | LINC00239 |
| 6.25E-04 | 6.103112 | 3.799876 | 2.8600834 | LY75 |
| 1.14E-03 | -5.73044 | 3.009552 | -2.8513195 | CA14 |
| 6.01E-05 | 7.534989 | 6.665047 | 2.8495437 | SUSD3 |
| 1.62E-05 | 8.386688 | 8.232324 | 2.8367308 | S1PR4 |
| 3.59E-05 | 7.864829 | 7.284193 | 2.8339964 | RASAL3 |
| 1.29E-03 | 5.649381 | 2.835486 | 2.8297153 | KIR2DS2 |
| 1.82E-03 | 5.442898 | 2.388838 | 2.8252153 | TLR8 |
| 3.65E-03 | 4.997625 | 1.411637 | 2.823417 | C1QTNF7 |
| 9.78E-05 | 7.230771 | 6.080268 | 2.822335 | CCDC88B |
| 1.01E-04 | 7.211198 | 6.042193 | 2.8159636 | C14orf182 |
| 1.45E-02 | -4.04987 | -0.70602 | -2.8105878 | HAMP |
| 3.19E-04 | 6.51753 | 4.658076 | 2.8097468 | AKNA |
| 4.42E-02 | -3.27312 | -2.423423 | -2.8094749 | GYG2 |
| 4.07E-03 | 4.922872 | 1.245993 | 2.8027047 | OGN |
| 3.93E-02 | -3.35953 | -2.235816 | -2.8014817 | AREG |
| 4.09E-04 | 6.361612 | 4.337848 | 2.8012751 | SLC16A6 |
| 1.16E-03 | 5.720491 | 2.988231 | 2.7949873 | GNLY |
| 6.34E-06 | 9.006142 | 9.308669 | 2.7880572 | S100Z |
| 5.86E-05 | -7.55371 | 6.700608 | -2.7851985 | C1orf105 |
| 8.06E-05 | 7.353208 | 6.317203 | 2.7748775 | TRIM14 |
| 4.36E-03 | 4.875972 | 1.141874 | 2.7686783 | ITGAX |
| 1.23E-02 | 4.164091 | -0.450082 | 2.7679638 | THY1 |
| 4.07E-04 | 6.367597 | 4.350201 | 2.7577411 | DOCK8 |
| 8.71E-04 | 5.891515 | 3.353202 | 2.7540527 | GTSF1 |
| 3.33E-04 | 6.489874 | 4.601514 | 2.749495 | EVI2A |
| 2.52E-04 | 6.662289 | 4.952439 | 2.7443794 | ADAM8 |
| 5.17E-06 | 9.136889 | 9.529193 | 2.7371402 | SYTL1 |
| 1.84E-03 | 5.433279 | 2.367924 | 2.7300195 | LDLRAD2 |
| 5.20E-05 | 7.631152 | 6.847155 | 2.7297553 | EMB |
| 3.34E-02 | 3.469483 | -1.995443 | 2.7171479 | APOBEC3A |
| 3.36E-05 | 7.906339 | 7.361017 | 2.7091206 | DOCK10 |
| 2.42E-03 | 5.270663 | 2.012955 | 2.7055034 | B3GAT1 |
| 2.95E-03 | 5.143134 | 1.732867 | 2.7030141 | TIGIT |
| 2.24E-04 | 6.734942 | 5.099094 | 2.6942954 | CD226 |
| 5.46E-03 | -4.71632 | 0.786438 | -2.6915631 | CDH16 |
| 3.19E-04 | 6.51539 | 4.653702 | 2.686078 | IL16 |
| 9.45E-04 | 5.836158 | 3.235445 | 2.6816114 | ADORA3 |
| 4.31E-04 | 6.326362 | 4.265003 | 2.6792797 | IPCEF1 |
| 2.25E-04 | 6.730928 | 5.09101 | 2.6748649 | LRRC17 |
| 7.94E-04 | 5.95408 | 3.485849 | 2.6666406 | C17orf87 |
| 1.24E-02 | 4.158295 | -0.463076 | 2.6643142 | C20orf103 |
| 1.90E-03 | 5.409727 | 2.316673 | 2.6632392 | NPFFR2 |
| 3.77E-04 | 6.412743 | 4.443222 | 2.6577765 | LPAR2 |
| 5.87E-03 | 4.663069 | 0.667587 | 2.6545152 | ITGB2 |
| 1.93E-02 | -3.85234 | -1.14759 | -2.6542644 | XLOC_006829 |
| 1.23E-02 | 4.164297 | -0.449619 | 2.6528316 | POSTN |
| 2.20E-02 | -3.76253 | -1.347653 | -2.650912 | COQ5 |
| 3.06E-04 | 6.542376 | 4.708801 | 2.6500727 | IL10RA |
| 3.58E-03 | 5.010507 | 1.440143 | 2.6398097 | MYCL1 |
| 3.94E-04 | 6.387737 | 4.391731 | 2.6388496 | IL7 |
| 1.65E-02 | -3.96404 | -0.89811 | -2.6355396 | ADAM11 |
| 1.49E-04 | 6.982207 | 5.592716 | 2.6341778 | GLIS1 |
| 3.59E-05 | 7.866892 | 7.288016 | 2.633081 | CASP8 |
| 2.20E-02 | 3.760034 | -1.353201 | 2.6300917 | APCDD1L |
| 4.28E-02 | 3.297957 | -2.369635 | 2.6278295 | IL4I1 |
| 6.82E-04 | -6.05204 | 3.692583 | -2.6273044 | GNMT |
| 2.26E-04 | 6.728308 | 5.085732 | 2.626123 | DENND2D |
| 7.08E-05 | 7.433637 | 6.471688 | 2.6236714 | APBB1IP |
| 7.19E-05 | 7.422026 | 6.449444 | 2.6228656 | CAMK4 |
| 1.60E-05 | 8.39999 | 8.255992 | 2.6084896 | PRF1 |
| 2.52E-04 | 6.663923 | 4.955744 | 2.6063729 | MMP25 |
| 4.19E-03 | 4.903825 | 1.203727 | 2.6007431 | ZNF215 |
| 1.88E-06 | 9.879486 | 10.739167 | 2.5999651 | CSF2RA |
| 1.28E-03 | 5.656883 | 2.851628 | 2.5994873 | CPNE7 |
| 1.28E-03 | 5.657259 | 2.852436 | 2.5981457 | LILRB1 |
| 4.82E-03 | 4.80485 | 0.983716 | 2.594006 | CCL3 |
| 1.71E-03 | 5.477994 | 2.465073 | 2.5838838 | CORO2A |
| 5.26E-05 | 7.62286 | 6.831504 | 2.578968 | RUNX2 |
| 2.95E-03 | 5.14395 | 1.734664 | 2.5782826 | RASL11B |
| 4.48E-03 | 4.855257 | 1.09584 | 2.5748275 | IL18RAP |
| 7.20E-04 | 6.012839 | 3.609991 | 2.5745648 | IRF4 |
| 3.87E-03 | 4.955828 | 1.319069 | 2.5712485 | LOC100131733 |
| 3.34E-03 | 5.061468 | 1.552785 | 2.5637529 | FLT3 |
| 3.78E-02 | 3.384567 | -2.181245 | 2.5567026 | TNC |
| 2.70E-04 | 6.620353 | 4.867457 | 2.5566121 | FRZB |
| 2.01E-03 | 5.376232 | 2.24369 | 2.5551058 | MPEG1 |
| 2.74E-05 | 8.041913 | 7.610225 | 2.5535569 | CD3D |
| 1.87E-03 | 5.422508 | 2.344491 | 2.5519053 | IFNG |
| 1.31E-03 | 5.641538 | 2.818605 | 2.5517759 | C1orf186 |
| 3.94E-03 | 4.944299 | 1.293513 | 2.5493851 | C5orf46 |
| 4.88E-05 | 7.675683 | 6.931039 | 2.5473111 | CLEC9A |
| 3.54E-02 | 3.429269 | -2.083561 | 2.5461869 | SPINK1 |
| 3.51E-04 | 6.460831 | 4.542004 | 2.5377275 | SLC4A8 |
| 1.32E-02 | 4.113471 | -0.563543 | 2.5315589 | ESPNL |
| 1.75E-03 | 5.465034 | 2.436936 | 2.5303011 | MS4A6A |
| 2.80E-05 | 8.02729 | 7.583472 | 2.5243391 | AIM1 |
| 2.05E-04 | 6.79165 | 5.213055 | 2.5223817 | RIMBP3 |
| 4.62E-02 | 3.240666 | -2.493557 | 2.5130267 | FLJ42969 |
| 2.29E-02 | 3.735801 | -1.407076 | 2.5071355 | WBSCR27 |
| 9.73E-05 | 7.237409 | 6.093168 | 2.5015543 | NDC80 |
| 1.57E-02 | -3.9967 | -0.825048 | -2.4996805 | EREG |
| 9.31E-04 | 5.849977 | 3.264875 | 2.499029 | ARRDC5 |
| 1.35E-03 | 5.62225 | 2.77706 | 2.4857615 | HLA-DOA |
| 4.14E-04 | -6.35291 | 4.319888 | -2.4840316 | LRRC8E |
| 1.87E-03 | 5.424868 | 2.349628 | 2.4809676 | ABCC3 |
| 1.69E-04 | 6.905344 | 5.440186 | 2.4785068 | PIK3IP1 |
| 1.76E-04 | 6.880197 | 5.390104 | 2.4724237 | SELPLG |
| 5.18E-03 | 4.759343 | 0.882362 | 2.4686774 | FAM72A |
| 5.77E-04 | 6.15021 | 3.898536 | 2.466834 | GPR18 |
| 4.83E-02 | 3.209413 | -2.560909 | 2.4627649 | CENPA |
| 3.88E-04 | 6.396281 | 4.409335 | 2.4607818 | FAM105A |
| 1.03E-03 | 5.78438 | 3.124973 | 2.4591 | FAM72D |
| 5.84E-03 | -4.66911 | 0.68107 | -2.4555969 | HOPX |
| 2.82E-04 | 6.594332 | 4.814606 | 2.4496698 | MYO1F |
| 2.23E-04 | 6.737529 | 5.104302 | 2.4464006 | RAB37 |
| 3.25E-02 | 3.489194 | -1.952171 | 2.4438391 | CPXM2 |
| 4.03E-04 | 6.375528 | 4.366562 | 2.4428208 | JAKMIP2 |
| 2.95E-04 | 6.568125 | 4.761283 | 2.4414768 | CCL3L3 |
| 5.21E-03 | 4.754507 | 0.871586 | 2.4391876 | DOK2 |
| 1.42E-03 | 5.594197 | 2.716565 | 2.4326591 | TNFSF13B |
| 2.09E-02 | -3.79524 | -1.274856 | -2.4294649 | ATP8A2 |
| 3.87E-03 | 4.955156 | 1.31758 | 2.4285361 | C16orf89 |
| 1.36E-02 | 4.095816 | -0.603105 | 2.426156 | MGC16025 |
| 1.80E-04 | 6.86459 | 5.358977 | 2.4255183 | PIK3CG |
| 4.91E-04 | 6.249688 | 4.105987 | 2.4246442 | XLOC_008370 |
| 1.65E-03 | 5.501246 | 2.515511 | 2.4233781 | GPR34 |
| 1.46E-02 | 4.047424 | -0.711502 | 2.4172047 | LOC389634 |
| 7.40E-04 | -5.99252 | 3.567104 | -2.416937 | E2F8 |
| 1.27E-03 | 5.667888 | 2.875294 | 2.4132727 | SLC16A9 |
| 1.37E-02 | -4.08717 | -0.622465 | -2.4081243 | LSAMP |
| 3.45E-03 | 5.042343 | 1.510534 | 2.4039614 | NLRC4 |
| 7.44E-03 | 4.509643 | 0.324493 | 2.4029872 | LMO3 |
| 3.26E-03 | -5.07799 | 1.589259 | -2.3996903 | MOG |
| 4.18E-03 | 4.905918 | 1.208372 | 2.3971838 | EBI3 |
| 2.60E-03 | 5.224464 | 1.911656 | 2.3952021 | RNASE6 |
| 2.05E-02 | 3.81273 | -1.235894 | 2.3937073 | GDF10 |
| 5.29E-03 | 4.742109 | 0.843949 | 2.3915829 | SPINK5 |
| 1.42E-02 | 4.066501 | -0.668776 | 2.3915364 | FOXD1 |
| 3.83E-02 | 3.375325 | -2.201406 | 2.3887682 | ERAP2 |
| 6.05E-05 | 7.529591 | 6.654786 | 2.3883789 | PRAM1 |
| 1.47E-03 | 5.576275 | 2.677872 | 2.3877375 | CLEC10A |
| 1.23E-05 | 8.56412 | 8.546009 | 2.385422 | LINC00256B |
| 4.65E-03 | 4.832655 | 1.045584 | 2.3842906 | SLITRK4 |
| 4.67E-05 | 7.707259 | 6.990348 | 2.3835154 | PSTPIP1 |
| 2.44E-03 | 5.264694 | 1.999876 | 2.383237 | HLA-DPB2 |
| 3.33E-02 | 3.470581 | -1.993033 | 2.3808627 | TFEC |
| 5.44E-03 | 4.72059 | 0.795965 | 2.3795034 | CP |
| 1.06E-02 | 4.273367 | -0.205053 | 2.3751814 | F2RL2 |
| 5.11E-04 | -6.22004 | 4.044287 | -2.3738507 | RTN4RL1 |
| 2.89E-03 | 5.160132 | 1.77028 | 2.3721417 | RARRES3 |
| 6.21E-04 | 6.107802 | 3.809714 | 2.3714659 | PTGDR |
| 1.80E-02 | -3.90358 | -1.033216 | -2.3656802 | MLXIPL |
| 3.68E-02 | -3.40359 | -2.139705 | -2.3625037 | KCNIP2 |
| 3.72E-03 | 4.981121 | 1.375101 | 2.3597859 | CD1E |
| 8.10E-03 | -4.45109 | 0.193358 | -2.3554117 | C19orf23 |
| 4.20E-03 | 4.901113 | 1.197705 | 2.3553089 | MS4A1 |
| 7.30E-03 | 4.523167 | 0.35477 | 2.3544379 | ANKRD30BP2 |
| 8.74E-04 | 5.886586 | 3.342732 | 2.3507785 | PARVG |
| 8.04E-03 | 4.455978 | 0.204307 | 2.3507299 | XLOC_012197 |
| 1.24E-04 | 7.091521 | 5.808207 | 2.3492082 | TRAF1 |
| 9.70E-03 | 4.329993 | -0.078074 | 2.347462 | ANGPTL5 |
| 7.08E-03 | 4.541733 | 0.396323 | 2.3458782 | SSC5D |
| 3.51E-04 | 6.456064 | 4.532225 | 2.3428307 | P2RY12 |
| 1.65E-03 | 5.5 | 2.512809 | 2.3394578 | MREG |
| 6.29E-05 | 7.505652 | 6.609228 | 2.3394191 | CCDC88C |
| 4.43E-03 | 4.864722 | 1.116878 | 2.337746 | GPR65 |
| 1.41E-02 | 4.069377 | -0.662334 | 2.333549 | APOA1 |
| 8.04E-03 | 4.456508 | 0.205494 | 2.3328279 | RASGRP1 |
| 3.14E-03 | 5.102031 | 1.642298 | 2.3305105 | SLA2 |
| 4.21E-04 | 6.343625 | 4.300699 | 2.3296088 | LOC100132057 |
| 1.28E-02 | 4.138564 | -0.507305 | 2.3289847 | ACOXL |
| 2.30E-03 | -5.30297 | 2.083688 | -2.3288257 | OR5F1 |
| 1.07E-03 | 5.762599 | 3.078408 | 2.328237 | CXorf21 |
| 3.25E-03 | 5.081441 | 1.596876 | 2.3275396 | MNDA |
| 1.48E-03 | 5.569201 | 2.662588 | 2.3254037 | ASPN |
| 2.41E-02 | -3.70489 | -1.475728 | -2.3241149 | XLOC_005647 |
| 1.90E-03 | 5.409672 | 2.316553 | 2.3239912 | ICOS |
| 7.44E-04 | 5.989529 | 3.560793 | 2.3235133 | SRCIN1 |
| 2.58E-04 | 6.648751 | 4.925031 | 2.3207898 | FANCA |
| 9.16E-03 | 4.373108 | 0.018589 | 2.3179671 | RBP5 |
| 2.20E-03 | 5.325277 | 2.132452 | 2.3167061 | VAV1 |
| 1.14E-05 | 8.610714 | 8.627661 | 2.3165608 | PARP8 |
| 9.52E-05 | -7.2524 | 6.122274 | -2.3161638 | LOC728978 |
| 4.16E-04 | 6.349573 | 4.312988 | 2.3137901 | HCLS1 |
| 4.75E-02 | -3.2216 | -2.534674 | -2.3101503 | LINC00473 |
| 7.34E-04 | 6.001241 | 3.58552 | 2.3076213 | SPEF2 |
| 1.31E-02 | 4.124641 | -0.538509 | 2.3071866 | SLAMF1 |
| 2.16E-03 | 5.336987 | 2.158038 | 2.3067914 | SLFN13 |
| 1.50E-03 | 5.55995 | 2.642596 | 2.3062402 | CD300LF |
| 4.66E-02 | 3.234611 | -2.50662 | 2.3060757 | FAM150B |
| 1.29E-03 | 5.65225 | 2.84166 | 2.3060749 | FAM117B |
| 1.34E-03 | 5.627105 | 2.787521 | 2.3050954 | HLA-DPB1 |
| 4.07E-03 | 4.921979 | 1.244013 | 2.3017441 | FKBP11 |
| 1.04E-02 | 4.288308 | -0.171547 | 2.299774 | IL5RA |
| 4.04E-04 | -6.3724 | 4.36011 | -2.2996532 | MYH6 |
| 2.38E-02 | 3.711808 | -1.460371 | 2.2995321 | KLHL6 |
| 5.86E-03 | 4.666193 | 0.674563 | 2.2969439 | PLAC8 |
| 6.01E-05 | 7.536927 | 6.668731 | 2.2957879 | FGD3 |
| 2.78E-03 | -5.18391 | 1.82257 | -2.2947285 | GRIK2 |
| 4.37E-05 | 7.746188 | 7.063272 | 2.292509 | TSC22D3 |
| 1.10E-04 | 7.15918 | 5.94074 | 2.2847528 | CORO1A |
| 3.57E-03 | 5.01564 | 1.451496 | 2.277091 | CARD9 |
| 7.27E-04 | 6.006178 | 3.59594 | 2.2765005 | ARAP2 |
| 5.78E-03 | 4.675635 | 0.695645 | 2.2758841 | LOC100506123 |
| 2.78E-03 | 5.183349 | 1.821343 | 2.2727697 | OMD |
| 2.54E-03 | 5.237687 | 1.940668 | 2.2715107 | BEND6 |
| 4.60E-02 | 3.245051 | -2.484094 | 2.2703249 | TMEM200A |
| 1.69E-02 | 3.943843 | -0.943261 | 2.270263 | C21orf7 |
| 1.92E-02 | 3.857192 | -1.136772 | 2.2691413 | IDO2 |
| 3.10E-02 | 3.524579 | -1.874367 | 2.2686393 | LTBP2 |
| 6.92E-04 | 6.037903 | 3.662813 | 2.2685301 | RAC2 |
| 1.84E-03 | 5.433306 | 2.367983 | 2.2660408 | FIBIN |
| 4.64E-03 | 4.834315 | 1.049274 | 2.2652012 | IL18 |
| 1.34E-02 | 4.104951 | -0.582636 | 2.2626261 | CYTH4 |
| 1.25E-03 | 5.681236 | 2.903981 | 2.2562727 | FAM133A |
| 1.56E-03 | 5.533421 | 2.585208 | 2.2532247 | PCNXL2 |
| 7.02E-04 | 6.029086 | 3.644241 | 2.2502171 | TRIM59 |
| 3.78E-03 | 4.969896 | 1.350239 | 2.2501337 | CASC2 |
| 2.99E-03 | 5.134726 | 1.714351 | 2.244678 | LINC00174 |
| 5.39E-04 | 6.190662 | 3.983048 | 2.2417754 | LRMP |
| 5.96E-03 | -4.65268 | 0.644373 | -2.2365459 | CNN1 |
| 8.71E-04 | 5.892825 | 3.355984 | 2.2359082 | C12orf75 |
| 3.56E-04 | -6.44836 | 4.51642 | -2.2356761 | CHDH |
| 4.21E-04 | 6.341846 | 4.297022 | 2.2333534 | LCP2 |
| 7.40E-04 | 5.994741 | 3.571799 | 2.2324457 | CSF1R |
| 3.66E-04 | 6.431797 | 4.482399 | 2.2195874 | TXNDC5 |
| 1.25E-03 | 5.679601 | 2.900468 | 2.2191309 | CDKN2A |
| 4.45E-03 | 4.858971 | 1.104096 | 2.2173998 | SERPINA1 |
| 1.38E-02 | 4.082079 | -0.63388 | 2.2161115 | ALOX5AP |
| 1.63E-02 | -3.97189 | -0.88055 | -2.2156722 | UTY |
| 1.72E-02 | 3.932905 | -0.967709 | 2.2117464 | XLOC_006924 |
| 2.95E-02 | 3.560864 | -1.794428 | 2.2035342 | HLA-DQA2 |
| 9.59E-03 | 4.338614 | -0.058745 | 2.2032894 | IRF8 |
| 1.65E-03 | 5.501985 | 2.517112 | 2.2016457 | BTN3A2 |
| 2.47E-03 | -5.25364 | 1.975649 | -2.2009006 | C4orf11 |
| 4.05E-04 | 6.370028 | 4.355216 | 2.2001998 | ABI3BP |
| 9.19E-03 | 4.369884 | 0.011362 | 2.1986903 | SCUBE2 |
| 1.46E-03 | 5.578948 | 2.683644 | 2.1972645 | GPR174 |
| 3.26E-03 | 5.076736 | 1.586493 | 2.1955234 | PAPLN |
| 1.84E-02 | -3.88904 | -1.065701 | -2.1950298 | SUSD4 |
| 9.23E-04 | 5.856757 | 3.279306 | 2.1912885 | MS4A4E |
| 2.92E-03 | 5.153621 | 1.755952 | 2.1853272 | C6orf97 |
| 7.73E-03 | 4.486192 | 0.271983 | 2.1849818 | COL6A6 |
| 1.03E-03 | 5.780995 | 3.11774 | 2.1760467 | LST1 |
| 8.21E-04 | 5.93206 | 3.439219 | 2.1744983 | CCL28 |
| 2.30E-03 | 5.300566 | 2.078418 | 2.172982 | ANPEP |
| 6.59E-03 | 4.590896 | 0.506301 | 2.1722261 | CD1B |
| 2.51E-02 | 3.672596 | -1.547365 | 2.1714946 | TACSTD2 |
| 3.01E-02 | 3.546208 | -1.826735 | 2.1711247 | FNDC1 |
| 3.07E-02 | 3.531774 | -1.858528 | 2.17009 | PTGDR2 |
| 3.94E-02 | -3.35672 | -2.241937 | -2.1697502 | SNX22 |
| 2.95E-03 | 5.145787 | 1.738708 | 2.1670927 | TNFAIP3 |
| 3.42E-02 | -3.45235 | -2.033011 | -2.1653432 | CRIP3 |
| 3.55E-03 | 5.019215 | 1.459403 | 2.1606756 | C6orf174 |
| 1.70E-03 | 5.481337 | 2.472327 | 2.1597243 | PTPRVP |
| 1.45E-02 | 4.04914 | -0.707658 | 2.158979 | LUM |
| 2.95E-03 | 5.145471 | 1.738012 | 2.1581089 | PSTPIP2 |
| 2.49E-03 | 5.25033 | 1.968394 | 2.1548046 | KIAA1407 |
| 1.98E-02 | -3.83882 | -1.17774 | -2.1540002 | C10orf108 |
| 1.11E-02 | -4.23912 | -0.28184 | -2.1506818 | GRID2IP |
| 3.74E-03 | 4.977255 | 1.366539 | 2.1477753 | PTAFR |
| 1.04E-04 | -7.19073 | 6.002324 | -2.1475027 | LOC100130899 |
| 4.31E-04 | 6.326771 | 4.26585 | 2.1464906 | SPNS3 |
| 1.03E-04 | 7.196088 | 6.012762 | 2.1464867 | TRERF1 |
| 1.93E-02 | 3.854863 | -1.141966 | 2.1449429 | NLRP3 |
| 2.19E-03 | 5.328633 | 2.139787 | 2.1438654 | PDE6A |
| 1.38E-02 | 4.08327 | -0.631212 | 2.1399387 | FBP1 |
| 3.23E-02 | -3.49332 | -1.943111 | -2.1374289 | KBTBD5 |
| 6.91E-04 | 6.040976 | 3.669286 | 2.1338279 | LAIR2 |
| 1.87E-04 | 6.839847 | 5.30956 | 2.1330841 | LOC388692 |
| 8.86E-04 | 5.87971 | 3.328122 | 2.1322424 | PSD4 |
| 4.10E-02 | 3.328268 | -2.303841 | 2.1321424 | TMEM130 |
| 9.43E-03 | 4.351614 | -0.029599 | 2.1320151 | PRSS30P |
| 3.00E-03 | 5.130015 | 1.703976 | 2.1301165 | PARP15 |
| 2.43E-02 | 3.697804 | -1.491457 | 2.1275976 | FCGR3A |
| 3.97E-02 | 3.351338 | -2.253665 | 2.1244349 | SCN2B |
| 6.09E-04 | 6.118491 | 3.832122 | 2.1230176 | CNTRL |
| 1.76E-04 | 6.882472 | 5.394639 | 2.1228317 | PLXNC1 |
| 9.78E-03 | 4.325067 | -0.089119 | 2.1206266 | C1QA |
| 7.34E-03 | 4.518405 | 0.344109 | 2.1196319 | MATL2963 |
| 4.42E-04 | 6.311416 | 4.234067 | 2.1189363 | LOC651536 |
| 1.74E-02 | -3.92563 | -0.983975 | -2.1184463 | ABRA |
| 7.86E-03 | 4.473774 | 0.24417 | 2.1173061 | ARHGAP9 |
| 1.77E-02 | 3.913823 | -1.010346 | 2.1146429 | VNN1 |
| 4.11E-03 | 4.915713 | 1.23011 | 2.1128529 | NUP210 |
| 1.22E-03 | 5.691573 | 2.926184 | 2.1100623 | QPCT |
| 3.06E-04 | 6.542906 | 4.709883 | 2.1050139 | C1orf162 |
| 3.11E-04 | 6.531407 | 4.686417 | 2.1037793 | SNX20 |
| 1.19E-02 | 4.19 | -0.391994 | 2.1033658 | NFAM1 |
| 1.45E-04 | -6.99938 | 5.626689 | -2.1006366 | PPP1R1A |
| 2.71E-06 | -9.59751 | 10.288116 | -2.0997515 | RNF212 |
| 1.26E-02 | 4.146673 | -0.489129 | 2.0987431 | E2F2 |
| 8.66E-03 | -4.40844 | 0.097792 | -2.098737 | HOOK1 |
| 4.87E-02 | 3.202816 | -2.575102 | 2.0981881 | HIST2H3A |
| 9.65E-04 | 5.823801 | 3.20911 | 2.094132 | FAM65B |
| 4.46E-04 | 6.303309 | 4.217274 | 2.0912118 | DLEC1 |
| 8.40E-03 | 4.42976 | 0.145563 | 2.0862695 | AIF1 |
| 3.89E-03 | 4.95096 | 1.308279 | 2.085771 | SIDT1 |
| 6.14E-03 | 4.63308 | 0.600597 | 2.083497 | C10orf105 |
| 1.66E-02 | 3.956576 | -0.914795 | 2.0821824 | APOBR |
| 7.32E-03 | 4.521002 | 0.349924 | 2.0733548 | LOC100653245 |
| 2.38E-04 | 6.696108 | 5.020795 | 2.0703504 | CLEC12A |
| 4.43E-02 | 3.27066 | -2.428752 | 2.0696022 | COL22A1 |
| 1.44E-02 | 4.054807 | -0.694968 | 2.0682925 | PLEK |
| 8.57E-03 | 4.413971 | 0.110182 | 2.0637709 | OASL |
| 9.02E-03 | -4.38416 | 0.043361 | -2.0634561 | OR10G2 |
| 1.32E-03 | 5.634689 | 2.803859 | 2.0612054 | GRAMD1C |
| 7.35E-04 | 5.999736 | 3.582346 | 2.061082 | ERMN |
| 8.81E-03 | 4.398091 | 0.074591 | 2.0592074 | UCMA |
| 3.72E-03 | -4.98061 | 1.373963 | -2.0586153 | MAGEB1 |
| 9.65E-03 | 4.333486 | -0.070243 | 2.0559261 | HLA-DRB5 |
| 2.47E-03 | 5.256233 | 1.981335 | 2.0523541 | FMO3 |
| 4.26E-03 | 4.889409 | 1.171718 | 2.0478567 | TMEM132E |
| 1.98E-02 | 3.837407 | -1.180894 | 2.0477336 | DNASE1L3 |
| 5.43E-05 | -7.60071 | 6.789654 | -2.0463202 | CDH9 |
| 3.01E-05 | 7.979518 | 7.495856 | 2.0435111 | XLOC_004803 |
| 8.46E-04 | 5.910727 | 3.393985 | 2.0433009 | SLC9B1 |
| 1.19E-02 | 4.191872 | -0.387798 | 2.0428989 | TNFAIP8L2 |
| 4.90E-02 | -3.1976 | -2.586324 | -2.0406935 | MYL7 |
| 1.13E-02 | 4.228437 | -0.305808 | 2.0390542 | CCL14 |
| 1.51E-02 | -4.02387 | -0.764236 | -2.0385299 | SHBG |
| 4.23E-02 | -3.30459 | -2.355248 | -2.036384 | DCAF12L2 |
| 1.46E-02 | 4.045655 | -0.715463 | 2.0337268 | HLA-DQB1 |
| 2.95E-02 | 3.558641 | -1.799328 | 2.0312457 | FCRLA |
| 6.91E-04 | 6.042421 | 3.672328 | 2.0300815 | ERP27 |
| 1.86E-02 | 3.88136 | -1.08284 | 2.0271977 | LAPTM5 |
| 1.78E-04 | 6.872731 | 5.375218 | 2.0262816 | RLTPR |
| 1.57E-03 | 5.532013 | 2.582162 | 2.0258887 | ADAM28 |
| 1.45E-02 | 4.049944 | -0.705858 | 2.0218132 | ALOX15B |
| 5.20E-04 | -6.21033 | 4.024068 | -2.0194418 | CENPV |
| 1.36E-02 | 4.09664 | -0.601258 | 2.0192977 | C1QB |
| 2.12E-02 | 3.784691 | -1.298337 | 2.0181341 | JAK3 |
| 1.51E-03 | 5.551764 | 2.624895 | 2.0177535 | GMIP |
| 9.31E-04 | 5.849847 | 3.264599 | 2.0171141 | GPC6 |
| 2.76E-02 | 3.605032 | -1.696917 | 2.0168819 | TMEM114 |
| 3.75E-02 | 3.389038 | -2.171489 | 2.0168506 | LYPD1 |
| 8.50E-04 | -5.90677 | 3.385581 | -2.015564 | CD79A |
| 5.95E-04 | 6.133401 | 3.863358 | 2.0147126 | ANGPT1 |
| 2.01E-02 | -3.82531 | -1.207862 | -2.0116743 | KCNG1 |
| 5.74E-03 | 4.681411 | 0.708541 | 2.010788 | HSPA6 |
| 1.63E-04 | 6.92902 | 5.487259 | 2.009379 | LOC100130000 |
| 2.12E-03 | 5.347188 | 2.180315 | 2.007328 | DDIT4 |
| 4.15E-02 | 3.319219 | -2.3235 | 2.0072663 | XG |
| 1.93E-02 | -3.85298 | -1.146159 | -2.0060919 | O3FAR1 |
| 6.39E-03 | -4.60918 | 0.547189 | -2.0040528 | PAQR5 |
| 5.94E-03 | 4.65435 | 0.648113 | 2.0036224 | C1orf38 |
| 4.75E-03 | 4.817397 | 1.011639 | 2.0031899 | TRGV7 |
| 6.84E-03 | 4.566711 | 0.45221 | 2.0020643 | MRC1 |
| 2.80E-03 | 5.178205 | 1.810033 | 2.0010871 | GCET2 |
| 5.42E-03 | 4.725236 | 0.806327 | 1.9994218 | TMEM236 |
| 8.39E-03 | 4.430959 | 0.14825 | 1.9950897 | SYK |
| 1.26E-03 | 5.67235 | 2.884887 | 1.99378 | GCNT1 |
| 1.54E-03 | 5.543472 | 2.60696 | 1.992527 | CLDN14 |
| 2.35E-02 | 3.720879 | -1.440228 | 1.9916924 | LOC150622 |
| 8.30E-04 | 5.923183 | 3.420402 | 1.985888 | BTN3A1 |
| 2.63E-03 | 5.216289 | 1.893711 | 1.98587 | ANGPTL1 |
| 6.97E-03 | 4.552909 | 0.421332 | 1.9857043 | SIGLEC1 |
| 3.38E-02 | -3.4601 | -2.016013 | -1.9813752 | SLC34A3 |
| 9.02E-03 | 4.383928 | 0.042843 | 1.9770684 | CCDC168 |
| 4.09E-03 | 4.918587 | 1.236486 | 1.9768293 | HAAO |
| 3.06E-02 | 3.534354 | -1.852848 | 1.975729 | SNAI3 |
| 4.57E-04 | 6.289291 | 4.188216 | 1.9740879 | SOCS1 |
| 2.06E-03 | 5.362599 | 2.213954 | 1.9737645 | PABPC1L |
| 1.29E-03 | -5.64875 | 2.834127 | -1.969341 | PPYR1 |
| 7.56E-05 | 7.392797 | 6.393361 | 1.9668057 | SMAP2 |
| 7.95E-03 | 4.464807 | 0.224084 | 1.9652224 | COTL1 |
| 3.51E-04 | -6.45945 | 4.539166 | -1.9649836 | KBTBD10 |
| 1.68E-02 | 3.94759 | -0.934885 | 1.9579422 | TMEM119 |
| 1.05E-02 | 4.279621 | -0.191028 | 1.9544558 | MNS1 |
| 3.69E-02 | 3.400431 | -2.146612 | 1.9534034 | ARMS2 |
| 1.24E-03 | 5.685532 | 2.91321 | 1.9525263 | CEBPE |
| 6.11E-03 | 4.636128 | 0.607408 | 1.9522736 | LAIR1 |
| 5.31E-05 | 7.61438 | 6.815488 | 1.9521591 | CASS4 |
| 8.44E-03 | 4.425185 | 0.135313 | 1.9518398 | STAT1 |
| 5.59E-03 | -4.69807 | 0.745713 | -1.9479671 | ANK2 |
| 2.73E-02 | -3.61399 | -1.677112 | -1.9446192 | VCY |
| 1.50E-02 | 4.026282 | -0.758837 | 1.9413436 | IGSF21 |
| 2.92E-02 | 3.565814 | -1.78351 | 1.939153 | PLEKHN1 |
| 3.41E-02 | -3.45585 | -2.025342 | -1.9380077 | TCF24 |
| 6.09E-03 | 4.639623 | 0.615216 | 1.9365155 | SLC7A7 |
| 5.77E-03 | -4.67786 | 0.700621 | -1.9351383 | MYOG |
| 3.47E-03 | 5.037767 | 1.500421 | 1.9303804 | RTKN2 |
| 4.67E-02 | 3.233247 | -2.509562 | 1.9294261 | CHRDL1 |
| 4.26E-03 | 4.890998 | 1.175248 | 1.9291075 | C5 |
| 1.05E-02 | -4.2785 | -0.193549 | -1.9283972 | KRTAP3-1 |
| 1.09E-02 | 4.250232 | -0.256933 | 1.9282816 | CD33 |
| 8.48E-03 | 4.421528 | 0.127118 | 1.9277805 | SLC25A34 |
| 1.71E-02 | 3.936121 | -0.960521 | 1.9217989 | KCNN4 |
| 9.67E-03 | 4.332336 | -0.072821 | 1.9205288 | IGFN1 |
| 2.65E-02 | 3.634815 | -1.63105 | 1.9186278 | FMOD |
| 3.03E-03 | 5.122678 | 1.68781 | 1.9167099 | KRTCAP3 |
| 6.55E-06 | 8.980991 | 9.265985 | 1.9161299 | TNIP3 |
| 5.68E-04 | 6.159115 | 3.917159 | 1.9149693 | TRPM2 |
| 4.36E-03 | 4.875466 | 1.14075 | 1.9147546 | RLN2 |
| 2.70E-02 | -3.62144 | -1.660651 | -1.9139348 | FAM83B |
| 1.91E-03 | 5.407157 | 2.311077 | 1.9103606 | HELB |
| 5.43E-03 | 4.723784 | 0.803088 | 1.9099221 | PTPRO |
| 1.25E-02 | 4.153636 | -0.47352 | 1.9086267 | XLOC_005849 |
| 6.83E-03 | 4.568328 | 0.455826 | 1.9074047 | KCNA4 |
| 3.71E-03 | 4.98235 | 1.377823 | 1.9060231 | RAB7B |
| 4.65E-02 | 3.236505 | -2.502536 | 1.9056297 | LOC100499484 |
| 1.12E-02 | 4.230702 | -0.300728 | 1.9054011 | ZCCHC5 |
| 3.58E-03 | -5.00865 | 1.436032 | -1.8982737 | KRTAP3-3 |
| 3.04E-03 | -5.12144 | 1.685071 | -1.897924 | RASSF10 |
| 1.01E-03 | 5.79735 | 3.152675 | 1.8973136 | GPR126 |
| 1.22E-02 | 4.173629 | -0.428699 | 1.8951659 | LOC440149 |
| 1.22E-03 | -5.69234 | 2.927839 | -1.89472 | FAM160A1 |
| 3.61E-03 | 5.003515 | 1.424674 | 1.8933635 | C1QTNF2 |
| 1.69E-03 | 5.486793 | 2.484166 | 1.890497 | AIM1L |
| 4.66E-02 | 3.234953 | -2.505882 | 1.8883958 | STK17B |
| 2.05E-02 | 3.813843 | -1.233414 | 1.8869693 | LILRB2 |
| 2.65E-02 | -3.63402 | -1.632804 | -1.8862553 | IL17RB |
| 2.56E-03 | 5.232873 | 1.930108 | 1.8855528 | SHC4 |
| 1.21E-02 | 4.180442 | -0.413424 | 1.8822051 | CILP |
| 4.90E-02 | -3.19844 | -2.584517 | -1.8803756 | LOC283485 |
| 4.22E-02 | 3.306139 | -2.35189 | 1.8778356 | LPPR4 |
| 6.23E-04 | 6.105484 | 3.804852 | 1.8776106 | FGD2 |
| 1.19E-02 | 4.192855 | -0.385593 | 1.8767539 | SEL1L3 |
| 5.60E-03 | 4.696535 | 0.742297 | 1.8764087 | IL12RB2 |
| 5.39E-03 | 4.728599 | 0.813827 | 1.8730884 | SDC1 |
| 4.26E-05 | 7.761527 | 7.091948 | 1.8720992 | SCARNA17 |
| 8.97E-03 | 4.387649 | 0.051185 | 1.8710424 | FLJ46906 |
| 1.16E-02 | 4.206682 | -0.354589 | 1.8704881 | HCG26 |
| 4.91E-04 | 6.246968 | 4.100331 | 1.8655124 | DERL3 |
| 8.08E-03 | -4.45386 | 0.199566 | -1.8642953 | PDE9A |
| 3.34E-04 | 6.487017 | 4.595665 | 1.863388 | LAT |
| 2.95E-03 | 5.141992 | 1.730352 | 1.8623597 | ANKRD36BP2 |
| 2.94E-02 | 3.563014 | -1.789685 | 1.8556604 | VSX1 |
| 3.66E-02 | 3.406838 | -2.132615 | 1.8550606 | L1TD1 |
| 1.08E-02 | -4.25709 | -0.24156 | -1.8477193 | C12orf34 |
| 1.21E-02 | 4.177961 | -0.418985 | 1.8471613 | OBFC2A |
| 1.71E-02 | 3.937937 | -0.956463 | 1.8467576 | P2RY13 |
| 5.57E-03 | 4.70208 | 0.754671 | 1.8465986 | ZNF846 |
| 1.75E-02 | 3.923067 | -0.989694 | 1.8447867 | MERTK |
| 2.09E-02 | 3.793987 | -1.277641 | 1.8440252 | PLVAP |
| 4.95E-02 | 3.189495 | -2.603737 | 1.8428437 | BANK1 |
| 4.43E-03 | -4.86442 | 1.116204 | -1.8426522 | MID1IP1 |
| 6.88E-04 | 6.045369 | 3.678533 | 1.8417343 | TNNI2 |
| 2.20E-03 | 5.324092 | 2.129863 | 1.8396293 | C9orf93 |
| 4.07E-04 | 6.365342 | 4.345547 | 1.8395571 | TRIM46 |
| 4.83E-03 | -4.80133 | 0.975883 | -1.8392784 | IGSF22 |
| 8.70E-03 | 4.40469 | 0.08938 | 1.8381031 | CLEC4E |
| 1.07E-02 | 4.264833 | -0.22419 | 1.8362248 | RMI2 |
| 2.02E-02 | 3.820154 | -1.219353 | 1.831776 | HLA-DQB2 |
| 1.66E-02 | -3.95715 | -0.913515 | -1.8316692 | FCN3 |
| 3.33E-03 | -5.06482 | 1.560176 | -1.8314603 | P2RY2 |
| 3.99E-02 | 3.348068 | -2.260782 | 1.8313425 | CSTA |
| 4.20E-02 | 3.309653 | -2.344265 | 1.8310814 | LILRB4 |
| 2.97E-04 | 6.562164 | 4.749141 | 1.8304131 | FAM113B |
| 1.27E-02 | -4.13948 | -0.50524 | -1.8299953 | XLOC_009868 |
| 9.99E-03 | 4.308256 | -0.126817 | 1.8276312 | NCF2 |
| 3.58E-03 | 5.008355 | 1.435382 | 1.8250428 | COL3A1 |
| 1.83E-03 | 5.438326 | 2.378899 | 1.8241162 | ANKRD36B |
| 9.49E-03 | 4.346432 | -0.041217 | 1.8223198 | FERMT3 |
| 3.65E-04 | 6.43391 | 4.48674 | 1.8219301 | WNT10A |
| 2.56E-02 | 3.657933 | -1.579859 | 1.8201188 | PITX1 |
| 1.72E-04 | -6.89312 | 5.415845 | -1.8182636 | SV2C |
| 2.83E-03 | 5.17033 | 1.792716 | 1.817884 | PTPN6 |
| 6.39E-03 | 4.608302 | 0.545218 | 1.8177631 | ART4 |
| 7.75E-03 | 4.48249 | 0.263693 | 1.8168115 | C2orf89 |
| 3.48E-03 | 5.033431 | 1.490836 | 1.8138489 | CFP |
| 1.27E-03 | 5.662969 | 2.864719 | 1.812454 | APOBEC3D |
| 6.78E-03 | 4.573155 | 0.466625 | 1.8067154 | AQP10 |
| 1.27E-03 | 5.667064 | 2.873522 | 1.8058728 | DPT |
| 1.85E-02 | -3.88707 | -1.070091 | -1.8028056 | FAM176A |
| 7.05E-03 | 4.545694 | 0.405186 | 1.8023265 | TMEM156 |
| 4.89E-02 | -3.20008 | -2.58099 | -1.8006804 | XIRP1 |
| 1.48E-03 | 5.569478 | 2.663186 | 1.7983718 | TSPAN5 |
| 5.97E-03 | 4.650415 | 0.639325 | 1.7971334 | TNFRSF18 |
| 4.44E-03 | 4.862278 | 1.111445 | 1.7964195 | LINC00173 |
| 4.05E-03 | 4.925154 | 1.251056 | 1.7956444 | STXBP2 |
| 3.83E-03 | -4.96105 | 1.33064 | -1.795265 | RPL27A |
| 1.10E-02 | 4.249381 | -0.258842 | 1.7942711 | ISLR |
| 5.22E-03 | 4.752963 | 0.868144 | 1.7936483 | ACSM1 |
| 7.58E-03 | 4.498048 | 0.298532 | 1.7880854 | CLECL1 |
| 4.06E-02 | 3.33514 | -2.288904 | 1.7871742 | GBA3 |
| 1.22E-02 | -4.17259 | -0.431029 | -1.7865077 | SLCO5A1 |
| 8.55E-05 | 7.315926 | 6.245282 | 1.786119 | LOC153684 |
| 2.94E-03 | -5.14762 | 1.742739 | -1.7856686 | RAP1GAP2 |
| 2.39E-02 | 3.708605 | -1.467482 | 1.7856211 | FCRL2 |
| 7.89E-03 | 4.470963 | 0.237875 | 1.7849224 | PLCB2 |
| 6.00E-03 | -4.64731 | 0.632388 | -1.7829044 | PTGER3 |
| 1.03E-03 | 5.782772 | 3.121537 | 1.7821952 | ANO9 |
| 8.19E-04 | -5.93467 | 3.444743 | -1.7806798 | LCN9 |
| 8.37E-03 | 4.432355 | 0.151379 | 1.7788964 | RGS10 |
| 3.15E-02 | 3.513557 | -1.89862 | 1.7774103 | TLR7 |
| 1.86E-02 | 3.880789 | -1.084114 | 1.7754369 | EDA2R |
| 1.21E-02 | 4.176384 | -0.422523 | 1.7724905 | CD160 |
| 4.45E-03 | -4.85811 | 1.102188 | -1.7719473 | CACNA1B |
| 2.41E-03 | 5.273798 | 2.019823 | 1.7707147 | HIST1H2AM |
| 3.40E-03 | 5.049265 | 1.525828 | 1.7705406 | CD1C |
| 6.64E-04 | 6.069041 | 3.72833 | 1.7674776 | GFRA2 |
| 5.57E-03 | -4.70164 | 0.753681 | -1.7671221 | KNG1 |
| 1.90E-02 | 3.865452 | -1.118343 | 1.7664209 | MIR155HG |
| 1.19E-02 | -4.19444 | -0.382046 | -1.7648412 | PVR |
| 2.18E-02 | 3.767548 | -1.336487 | 1.7630884 | NPAS3 |
| 4.82E-03 | 4.804276 | 0.982437 | 1.7630762 | LOC100128019 |
| 1.14E-02 | 4.220442 | -0.323735 | 1.7601118 | CAPN12 |
| 9.67E-03 | -4.33134 | -0.075056 | -1.759722 | WWC1 |
| 7.92E-03 | 4.467795 | 0.230779 | 1.7569299 | FLJ42351 |
| 1.93E-02 | 3.853577 | -1.144835 | 1.7555385 | HLA-DMB |
| 6.22E-03 | -4.62528 | 0.583167 | -1.7506144 | DCHS2 |
| 5.93E-03 | 4.656751 | 0.653477 | 1.7505671 | FOXP2 |
| 9.35E-04 | 5.845906 | 3.256209 | 1.7461996 | PTK2B |
| 2.21E-02 | -3.75904 | -1.355408 | -1.746003 | LOC729175 |
| 1.09E-02 | 4.250534 | -0.256257 | 1.7458417 | ADCY7 |
| 2.70E-02 | 3.62133 | -1.660885 | 1.7458033 | STAT4 |
| 1.19E-02 | 4.187199 | -0.398274 | 1.7450758 | RANBP17 |
| 4.43E-03 | 4.86447 | 1.116317 | 1.7438128 | ZNF812 |
| 1.70E-04 | -6.90158 | 5.4327 | -1.7417267 | ATP2A2 |
| 1.80E-03 | 5.447378 | 2.398577 | 1.7408113 | HKDC1 |
| 2.82E-03 | 5.174759 | 1.802456 | 1.7401684 | GPR132 |
| 7.08E-03 | 4.542422 | 0.397865 | 1.7398512 | FMNL1 |
| 3.01E-02 | 3.546239 | -1.826667 | 1.7386705 | SUSD2 |
| 2.12E-02 | -3.78406 | -1.29974 | -1.7380219 | C8G |
| 1.59E-04 | -6.94607 | 5.521115 | -1.7378196 | CNIH2 |
| 2.79E-03 | -5.18243 | 1.819313 | -1.7376979 | LOC100129596 |
| 1.09E-02 | -4.25008 | -0.257277 | -1.7358998 | TGM6 |
| 1.13E-02 | 4.227279 | -0.308404 | 1.7352735 | HELLS |
| 2.02E-02 | 3.820045 | -1.219596 | 1.7351551 | LRRC25 |
| 6.71E-03 | 4.578616 | 0.478838 | 1.7351542 | C1QC |
| 4.33E-03 | 4.879491 | 1.149691 | 1.7349366 | FREM1 |
| 3.55E-02 | 3.42841 | -2.08544 | 1.7349194 | HAVCR2 |
| 2.48E-02 | 3.679576 | -1.531889 | 1.731831 | VDR |
| 1.81E-02 | 3.900042 | -1.041129 | 1.730892 | ZNF287 |
| 3.13E-02 | 3.517588 | -1.889751 | 1.7307975 | LOC399715 |
| 2.41E-02 | 3.702468 | -1.481104 | 1.7298201 | KCNMA1 |
| 4.09E-03 | -4.91975 | 1.239062 | -1.7295698 | WSCD1 |
| 2.49E-02 | 3.67652 | -1.538666 | 1.7287529 | SCRG1 |
| 3.93E-03 | 4.946449 | 1.29828 | 1.7274224 | KRT86 |
| 3.92E-02 | -3.3609 | -2.232835 | -1.7244266 | SNCB |
| 5.53E-03 | -4.70879 | 0.769631 | -1.7240326 | HES6 |
| 5.47E-03 | 4.715244 | 0.784039 | 1.7238198 | ZMAT1 |
| 4.45E-02 | -3.26639 | -2.437988 | -1.7234075 | MGST1 |
| 8.31E-04 | 5.921029 | 3.415836 | 1.7215986 | SP140L |
| 3.75E-02 | -3.38875 | -2.172124 | -1.7211473 | ASPG |
| 8.46E-04 | -5.9097 | 3.391797 | -1.720427 | PTK2 |
| 2.52E-02 | -3.66774 | -1.55812 | -1.7183709 | KISS1 |
| 2.03E-02 | 3.817695 | -1.224831 | 1.7173937 | TCEANC |
| 3.13E-02 | 3.519023 | -1.886594 | 1.7148442 | DNM1P46 |
| 2.23E-03 | 5.317661 | 2.115804 | 1.7140217 | COL16A1 |
| 2.66E-02 | 3.63198 | -1.637322 | 1.7134885 | TGFBR2 |
| 7.89E-03 | -4.47053 | 0.2369 | -1.71241 | WFDC2 |
| 4.29E-02 | 3.294663 | -2.376775 | 1.712135 | KRT1 |
| 6.91E-04 | -6.03932 | 3.665804 | -1.7120593 | SYT7 |
| 1.91E-03 | 5.405484 | 2.307434 | 1.7114366 | FLJ31104 |
| 1.86E-02 | -3.88274 | -1.079758 | -1.7106579 | XLOC_005342 |
| 2.51E-02 | 3.671571 | -1.549638 | 1.710372 | KY |
| 2.69E-04 | 6.626319 | 4.879562 | 1.7077049 | LRRK2 |
| 3.54E-03 | 5.023151 | 1.46811 | 1.706431 | HESX1 |
| 2.92E-02 | 3.565913 | -1.783291 | 1.7057844 | KYNU |
| 4.62E-02 | 3.241986 | -2.490708 | 1.7053301 | KIAA0101 |
| 1.55E-02 | 4.006377 | -0.803392 | 1.7040186 | TOX |
| 6.77E-03 | -4.57407 | 0.468681 | -1.7019887 | PTPRH |
| 7.24E-03 | 4.528126 | 0.36587 | 1.7018461 | CFH |
| 7.85E-04 | 5.960874 | 3.500225 | 1.7017973 | SCARNA2 |
| 4.39E-04 | 6.315001 | 4.241489 | 1.700879 | FOLH1 |
| 4.81E-02 | 3.21285 | -2.553512 | 1.6998656 | COL14A1 |
| 2.40E-02 | -3.70791 | -1.469022 | -1.6989331 | GEMIN8P4 |
| 3.46E-02 | 3.444062 | -2.051171 | 1.697188 | FCGR2B |
| 5.44E-03 | 4.720609 | 0.796006 | 1.6966323 | CXorf57 |
| 1.05E-02 | 4.275568 | -0.200118 | 1.6941796 | FST |
| 3.71E-02 | 3.395775 | -2.156781 | 1.6940656 | VSIG7 |
| 1.13E-02 | -4.22461 | -0.314393 | -1.6933671 | KCNN2 |
| 9.23E-03 | 4.367136 | 0.005202 | 1.6932137 | CLEC4A |
| 9.91E-03 | 4.316592 | -0.108125 | 1.6929259 | SLC27A2 |
| 1.14E-02 | 4.219585 | -0.325658 | 1.6914707 | MLF1IP |
| 2.14E-04 | 6.76636 | 5.162287 | 1.6893336 | IL23A |
| 5.59E-03 | 4.69908 | 0.747975 | 1.6837068 | HLA-DMA |
| 1.62E-02 | 3.975184 | -0.873181 | 1.6833861 | HLA-DPA1 |
| 2.68E-02 | 3.627416 | -1.647421 | 1.6828152 | ATP1A1OS |
| 1.47E-02 | 4.042684 | -0.722114 | 1.6805634 | TYROBP |
| 3.48E-03 | 5.034923 | 1.494136 | 1.679524 | IFIT2 |
| 3.17E-03 | 5.095439 | 1.62776 | 1.6787513 | ZBED2 |
| 7.92E-03 | -4.46831 | 0.231937 | -1.6778594 | OTUD6A |
| 3.57E-02 | 3.422658 | -2.098026 | 1.6777198 | SH3TC2 |
| 1.64E-02 | 3.965425 | -0.895009 | 1.6773133 | LOC151657 |
| 5.60E-03 | 4.696212 | 0.741575 | 1.675785 | LTC4S |
| 3.42E-02 | 3.452146 | -2.03346 | 1.6752077 | FAM46C |
| 4.44E-03 | 4.861332 | 1.109343 | 1.6749451 | MCTP2 |
| 2.48E-02 | 3.682611 | -1.525159 | 1.6742211 | MS4A4A |
| 4.83E-03 | 4.801482 | 0.976217 | 1.6724607 | LRRC4C |
| 4.90E-03 | -4.79293 | 0.957178 | -1.6722815 | DEFB128 |
| 1.11E-02 | -4.24047 | -0.278816 | -1.6695562 | LMO1 |
| 4.87E-02 | 3.204874 | -2.570676 | 1.6689553 | TFF3 |
| 4.52E-02 | -3.25646 | -2.459448 | -1.6687579 | XLOC_007052 |
| 2.84E-03 | 5.169319 | 1.790492 | 1.6665164 | H1FX-AS1 |
| 4.26E-03 | 4.889885 | 1.172776 | 1.6664451 | ANKRD44 |
| 1.02E-02 | -4.29687 | -0.152347 | -1.6650102 | CNTNAP3B |
| 2.41E-02 | -3.704 | -1.477706 | -1.6638913 | SRRM3 |
| 9.35E-03 | 4.35818 | -0.014878 | 1.6618704 | TTC24 |
| 1.48E-03 | 5.571155 | 2.666811 | 1.6593482 | LINC00158 |
| 2.72E-02 | 3.615408 | -1.67398 | 1.6589528 | RAB11FIP4 |
| 1.19E-02 | 4.187197 | -0.398279 | 1.6586254 | CD74 |
| 2.20E-02 | 3.763059 | -1.346474 | 1.6562007 | MGC4294 |
| 8.02E-03 | -4.46014 | 0.213625 | -1.6557947 | DDX11L2 |
| 4.03E-02 | 3.341937 | -2.274122 | 1.6551383 | KCNN3 |
| 5.36E-03 | 4.73453 | 0.827052 | 1.6548729 | ZNF214 |
| 2.37E-04 | -6.69897 | 5.026572 | -1.654312 | RBPMS2 |
| 4.60E-02 | 3.244476 | -2.485335 | 1.6521088 | C1orf204 |
| 1.61E-02 | -3.97909 | -0.864443 | -1.6515212 | FAM83G |
| 9.97E-03 | 4.30983 | -0.123286 | 1.6510622 | HLA-DRB1 |
| 2.47E-03 | 5.254601 | 1.977757 | 1.6500603 | BMF |
| 1.31E-03 | 5.641578 | 2.818692 | 1.6486964 | CCDC65 |
| 1.49E-02 | 4.029781 | -0.751003 | 1.6467847 | PTCRA |
| 2.11E-02 | 3.786505 | -1.2943 | 1.6424403 | LILRA2 |
| 1.43E-02 | 4.060918 | -0.681282 | 1.6420525 | FAM21C |
| 1.82E-02 | 3.898331 | -1.044949 | 1.6410813 | TRANK1 |
| 9.38E-03 | 4.355641 | -0.02057 | 1.6362794 | PLEKHH2 |
| 2.41E-02 | -3.70524 | -1.474943 | -1.6357596 | GPSM2 |
| 2.36E-02 | 3.719706 | -1.442833 | 1.6356594 | GDPD3 |
| 2.04E-02 | -3.81652 | -1.227447 | -1.635526 | BOD1P |
| 1.86E-02 | 3.879548 | -1.086885 | 1.6352776 | TRIM66 |
| 2.09E-02 | 3.795182 | -1.274981 | 1.6321462 | MYRIP |
| 1.28E-03 | 5.658376 | 2.854839 | 1.6315006 | XLOC_002070 |
| 1.16E-02 | 4.212051 | -0.342551 | 1.6314454 | TMOD4 |
| 4.52E-02 | 3.256606 | -2.459138 | 1.6307207 | CD163 |
| 1.30E-02 | 4.126377 | -0.53462 | 1.6306224 | RAB38 |
| 9.43E-04 | 5.837968 | 3.239301 | 1.627572 | LOC100131096 |
| 1.36E-02 | 4.093985 | -0.607208 | 1.6268688 | LOC100129399 |
| 2.95E-02 | -3.56034 | -1.795572 | -1.6268255 | LONRF3 |
| 4.00E-03 | 4.934732 | 1.2723 | 1.623382 | ZNRD1-AS1 |
| 9.50E-03 | 4.344491 | -0.045569 | 1.6213684 | LOC100131564 |
| 1.18E-04 | 7.115926 | 5.856087 | 1.61916 | PIWIL4 |
| 1.06E-02 | 4.269918 | -0.212786 | 1.618698 | C1orf220 |
| 2.94E-03 | 5.148959 | 1.745691 | 1.6182847 | ATP2A3 |
| 1.37E-02 | 4.088064 | -0.620473 | 1.6176068 | MAFB |
| 3.40E-03 | 5.049648 | 1.526675 | 1.6152718 | MFAP4 |
| 1.12E-02 | -4.23079 | -0.300539 | -1.6145192 | FOSL1 |
| 2.41E-02 | 3.702664 | -1.480671 | 1.6133741 | LOC100131176 |
| 8.46E-03 | 4.423263 | 0.131006 | 1.6131935 | LOC282997 |
| 3.23E-02 | 3.492441 | -1.945039 | 1.613118 | CEP128 |
| 5.27E-03 | -4.74582 | 0.852222 | -1.6126332 | LOC386597 |
| 1.09E-02 | -4.25516 | -0.245886 | -1.6121615 | TMEM63C |
| 1.09E-02 | 4.25397 | -0.248552 | 1.6115694 | LSP1 |
| 4.56E-02 | 3.251022 | -2.471201 | 1.6105281 | C1orf228 |
| 4.70E-02 | -3.22788 | -2.521143 | -1.6083897 | VAV2 |
| 1.97E-02 | 3.842241 | -1.170116 | 1.6076049 | CXCL16 |
| 1.41E-02 | -4.06856 | -0.664157 | -1.6063805 | ARSF |
| 4.52E-03 | 4.847908 | 1.079503 | 1.6061951 | GMFG |
| 1.88E-02 | -3.8705 | -1.107077 | -1.6054681 | SGK110 |
| 1.57E-02 | -3.99843 | -0.821164 | -1.6045932 | OCM2 |
| 1.39E-02 | 4.077704 | -0.643681 | 1.6038263 | GLT25D2 |
| 1.17E-02 | 4.204889 | -0.358609 | 1.6028634 | KMO |
| 6.57E-03 | -4.59284 | 0.510644 | -1.60226 | RPH3A |
| 7.78E-03 | 4.480033 | 0.258189 | 1.6022061 | NFATC2 |
| 7.75E-03 | 4.482811 | 0.264412 | 1.6001211 | ANKK1 |
| 1.87E-02 | -3.87766 | -1.091104 | -1.5982719 | GPD1 |
| 5.77E-03 | 4.67777 | 0.700411 | 1.5982523 | SCARNA5 |
| 2.55E-02 | 3.662189 | -1.57043 | 1.5979113 | FOLR2 |
| 2.33E-02 | 3.726894 | -1.426867 | 1.5971394 | C1QTNF6 |
| 1.89E-03 | -5.41687 | 2.332232 | -1.5969792 | RGS9BP |
| 3.16E-02 | 3.510399 | -1.905566 | 1.5965673 | CENPM |
| 3.00E-03 | -5.13117 | 1.70653 | -1.5941843 | JPH1 |
| 9.50E-03 | 4.345538 | -0.043221 | 1.5937016 | USP51 |
| 1.52E-02 | -4.01993 | -0.773057 | -1.5934881 | ADARB2 |
| 1.26E-02 | 4.1455 | -0.491756 | 1.5930116 | CATSPER1 |
| 4.14E-02 | 3.320901 | -2.319847 | 1.5922302 | CLEC2D |
| 1.26E-03 | 5.669328 | 2.87839 | 1.5887 | NCK2 |
| 1.34E-02 | -4.10629 | -0.579626 | -1.5884346 | LOC728503 |
| 1.53E-02 | 4.017697 | -0.778056 | 1.5873004 | C11orf80 |
| 2.38E-02 | 3.712705 | -1.458379 | 1.5865763 | ZFHX4 |
| 7.92E-03 | 4.467503 | 0.230123 | 1.5864218 | F2R |
| 2.29E-02 | 3.735669 | -1.407369 | 1.5864076 | ECM2 |
| 1.08E-02 | 4.255923 | -0.24417 | 1.5857471 | ZNF501 |
| 4.32E-02 | 3.290468 | -2.385867 | 1.5841265 | DMC1 |
| 1.39E-02 | 4.077924 | -0.643189 | 1.5836885 | VAMP8 |
| 3.45E-03 | 5.042396 | 1.510651 | 1.5810185 | MEG3 |
| 1.77E-02 | 3.913393 | -1.011306 | 1.5809664 | TFCP2L1 |
| 4.33E-02 | 3.287817 | -2.391608 | 1.5807076 | TLR2 |
| 8.28E-03 | 4.439048 | 0.166377 | 1.5806375 | TCF7 |
| 3.07E-04 | -6.53976 | 4.703468 | -1.5789244 | DUSP13 |
| 6.09E-03 | 4.638772 | 0.613314 | 1.5788088 | TLR5 |
| 1.08E-02 | -4.25672 | -0.242388 | -1.5782139 | CDC42 |
| 4.06E-02 | -3.33451 | -2.290284 | -1.5778801 | FAM153A |
| 1.54E-02 | 4.010379 | -0.794433 | 1.5774314 | SAMD9L |
| 1.99E-02 | 3.834603 | -1.187147 | 1.5767552 | RPGRIP1 |
| 2.26E-02 | 3.747151 | -1.381849 | 1.576186 | CFHR3 |
| 7.67E-03 | -4.49123 | 0.28326 | -1.5740699 | SOX10 |
| 4.78E-02 | 3.217543 | -2.543406 | 1.5733595 | ALOX5 |
| 3.55E-03 | 5.021054 | 1.463471 | 1.5728519 | PIF1 |
| 6.05E-03 | 4.642786 | 0.622282 | 1.572402 | FAM125A |
| 5.85E-03 | 4.66721 | 0.676835 | 1.5723691 | XLOC_004341 |
| 3.30E-02 | 3.477201 | -1.978505 | 1.5723595 | EPSTI1 |
| 1.31E-02 | 4.120268 | -0.548311 | 1.5715929 | WIPF1 |
| 4.25E-03 | 4.892506 | 1.178596 | 1.5695278 | CTSK |
| 4.46E-02 | 3.26578 | -2.439306 | 1.5690395 | UCP2 |
| 3.91E-02 | -3.36385 | -2.226407 | -1.5688118 | LOC100127961 |
| 8.03E-03 | 4.458518 | 0.209996 | 1.5675548 | FCAR |
| 1.80E-02 | -3.90574 | -1.028405 | -1.5669375 | WDR62 |
| 1.69E-02 | 3.943919 | -0.943092 | 1.5643576 | DOK3 |
| 4.74E-03 | 4.818781 | 1.014717 | 1.5635324 | ARRDC3 |
| 1.78E-03 | 5.453438 | 2.411747 | 1.5634608 | RAB27B |
| 4.33E-03 | 4.880289 | 1.151462 | 1.5624242 | ERN1 |
| 8.33E-03 | 4.436236 | 0.160075 | 1.5604896 | INPP5D |
| 4.26E-03 | -4.88911 | 1.171044 | -1.5593981 | IL15RA |
| 1.39E-02 | 4.076519 | -0.646337 | 1.5588186 | APOBEC3G |
| 2.73E-02 | 3.611163 | -1.683366 | 1.5572132 | LINC00246A |
| 5.39E-03 | 4.729534 | 0.815912 | 1.5570037 | ICAM4 |
| 7.68E-03 | -4.49027 | 0.281124 | -1.5564666 | PDE4D |
| 2.03E-03 | -5.37028 | 2.230698 | -1.555417 | OTUD7A |
| 3.32E-02 | -3.4729 | -1.987943 | -1.5550565 | LTK |
| 2.42E-03 | 5.269763 | 2.010984 | 1.5520048 | HDAC10 |
| 3.09E-03 | 5.109804 | 1.659436 | 1.5518483 | PYCARD |
| 1.53E-02 | -4.01638 | -0.781004 | -1.5503272 | FLJ23867 |
| 2.74E-03 | -5.1938 | 1.844318 | -1.5478003 | RHOD |
| 1.03E-02 | 4.291598 | -0.16417 | 1.5472935 | BMP6 |
| 1.19E-02 | 4.192918 | -0.385452 | 1.5437358 | METTL7A |
| 8.44E-03 | 4.424685 | 0.134192 | 1.5401526 | ASPHD2 |
| 1.51E-02 | 4.022315 | -0.767717 | 1.5400378 | COL5A1 |
| 2.11E-02 | 3.790236 | -1.285994 | 1.5396943 | CCNG2 |
| 1.22E-02 | 4.170448 | -0.43583 | 1.5371285 | FANK1 |
| 2.04E-02 | -3.81481 | -1.231251 | -1.5346892 | C1QTNF1 |
| 3.03E-02 | 3.540161 | -1.840058 | 1.5337127 | GAPT |
| 2.42E-02 | 3.701519 | -1.483212 | 1.533591 | ZC3H12B |
| 8.02E-04 | 5.948673 | 3.474405 | 1.5324798 | ATP10D |
| 1.44E-02 | 4.05665 | -0.69084 | 1.5315702 | NAPSA |
| 2.75E-02 | 3.607895 | -1.69059 | 1.5311724 | XLOC_006883 |
| 1.12E-02 | -4.23282 | -0.295983 | -1.5303781 | ART5 |
| 5.39E-03 | 4.729086 | 0.814913 | 1.5284091 | IL12RB1 |
| 1.20E-02 | 4.183668 | -0.406192 | 1.5254098 | COL1A2 |
| 1.18E-02 | 4.197012 | -0.376271 | 1.5252987 | CENPE |
| 1.72E-02 | 3.934142 | -0.964945 | 1.5242393 | HIST1H2AI |
| 4.56E-02 | -3.24994 | -2.473545 | -1.5232667 | C11orf52 |
| 2.68E-02 | 3.628149 | -1.645799 | 1.5231187 | TSPAN32 |
| 4.85E-03 | -4.79931 | 0.971373 | -1.5221057 | TNFRSF19 |
| 6.64E-03 | -4.58599 | 0.495328 | -1.5206407 | TMEM63B |
| 1.22E-02 | 4.171932 | -0.432503 | 1.5200611 | GALNT12 |
| 6.79E-03 | -4.57104 | 0.461884 | -1.5196131 | KCNJ5 |
| 5.18E-03 | 4.758689 | 0.880904 | 1.5192224 | HCP5 |
| 1.05E-02 | 4.275319 | -0.200676 | 1.5187767 | GLT8D2 |
| 8.90E-04 | -5.8768 | 3.321932 | -1.5180527 | LAMA4 |
| 3.19E-02 | 3.503358 | -1.921046 | 1.5178181 | HK3 |
| 2.20E-02 | 3.760184 | -1.352868 | 1.5175639 | STAG3 |
| 7.30E-03 | -4.52273 | 0.353795 | -1.5154799 | DKFZp779M0652 |
| 7.39E-03 | -4.51291 | 0.331801 | -1.5142572 | KIAA1456 |
| 9.65E-03 | 4.333791 | -0.06956 | 1.5140979 | FANCD2 |
| 1.33E-02 | 4.110152 | -0.570981 | 1.5134649 | CFB |
| 2.73E-02 | 3.611512 | -1.682593 | 1.5133589 | MEGF6 |
| 5.53E-03 | -4.70845 | 0.768876 | -1.5133197 | KIF26B |
| 2.74E-02 | 3.609412 | -1.687237 | 1.5125546 | MS4A14 |
| 1.57E-03 | 5.531494 | 2.581037 | 1.512478 | PLD4 |
| 1.98E-02 | 3.836886 | -1.182057 | 1.5113789 | SCG5 |
| 1.83E-02 | 3.894339 | -1.053862 | 1.5108523 | FGR |
| 3.53E-02 | -3.43181 | -2.078003 | -1.5107451 | SLC39A14 |
| 6.02E-03 | -4.64493 | 0.627069 | -1.5096624 | SERPINA6 |
| 6.52E-03 | 4.597672 | 0.521453 | 1.508847 | CGNL1 |
| 9.07E-03 | 4.380216 | 0.034522 | 1.5085183 | C17orf66 |
| 1.15E-03 | 5.725445 | 2.998849 | 1.5076692 | SLC9A9 |
| 3.36E-02 | 3.465576 | -2.004012 | 1.5076333 | MICB |
| 4.03E-02 | 3.341491 | -2.275093 | 1.5074862 | CCNO |
| 2.08E-02 | 3.801743 | -1.260369 | 1.5070234 | MT1F |
| 4.05E-02 | 3.33739 | -2.284011 | 1.5061692 | COLQ |
| 4.71E-02 | -3.22741 | -2.522146 | -1.5050091 | LYVE1 |
| 1.86E-02 | 3.884459 | -1.07592 | 1.5022144 | BFSP2 |
| 6.79E-03 | -4.57207 | 0.464197 | -1.4999028 | FAM83F |
| 6.29E-04 | 6.099296 | 3.79187 | 1.4923369 | SLIT2 |
| 4.68E-03 | 4.82695 | 1.032892 | 1.4917243 | LOC283861 |
| 1.96E-03 | 5.391101 | 2.276102 | 1.4916885 | ARHGAP25 |
| 3.73E-04 | 6.422031 | 4.462325 | 1.4896244 | KIF20B |
| 3.56E-02 | -3.42482 | -2.093286 | -1.4890862 | C8orf67 |
| 1.43E-02 | 4.061789 | -0.679331 | 1.4882756 | HAUS5 |
| 2.82E-03 | 5.175753 | 1.804642 | 1.4864049 | HEMK1 |
| 1.76E-02 | 3.918302 | -1.00034 | 1.486234 | MS4A7 |
| 1.53E-02 | 4.015927 | -0.782018 | 1.4851206 | LOC145837 |
| 1.81E-02 | -3.90127 | -1.038387 | -1.4851001 | NT5DC2 |
| 2.95E-03 | 5.142902 | 1.732357 | 1.4843564 | ARRDC2 |
| 4.04E-02 | 3.33912 | -2.28025 | 1.4838371 | CDCA7 |
| 4.22E-02 | -3.30716 | -2.349679 | -1.483257 | MS4A18 |
| 4.77E-03 | 4.81216 | 0.999985 | 1.4821024 | CBLN3 |
| 9.43E-03 | -4.35176 | -0.029272 | -1.4807972 | ABCC5 |
| 1.55E-02 | 4.005756 | -0.804781 | 1.4807278 | RAB44 |
| 9.13E-03 | 4.375452 | 0.023843 | 1.4799446 | TGM1 |
| 3.60E-02 | -3.41736 | -2.109613 | -1.4771861 | FLJ44385 |
| 8.33E-03 | 4.435642 | 0.158744 | 1.4748075 | LOX |
| 6.84E-03 | 4.565053 | 0.4485 | 1.4744273 | TACC3 |
| 1.29E-03 | 5.647833 | 2.832157 | 1.4741875 | CYSLTR1 |
| 1.85E-02 | 3.887781 | -1.068505 | 1.473359 | HENMT1 |
| 1.16E-02 | -4.20904 | -0.349301 | -1.472541 | P2RX3 |
| 4.70E-03 | 4.824404 | 1.027228 | 1.4720672 | ATP8B2 |
| 1.06E-02 | 4.273724 | -0.204252 | 1.4707061 | PIP4K2A |
| 8.48E-03 | 4.42012 | 0.123961 | 1.4702882 | HLA-DOB |
| 3.19E-02 | 3.502781 | -1.922314 | 1.4688594 | ESR1 |
| 3.20E-02 | 3.499373 | -1.929806 | 1.4687775 | MLC1 |
| 1.73E-02 | 3.931013 | -0.971938 | 1.4663584 | LOC115110 |
| 1.93E-02 | 3.852049 | -1.148243 | 1.4650527 | PRSS57 |
| 3.49E-02 | 3.438692 | -2.062933 | 1.4649844 | DNAH12 |
| 3.33E-02 | -3.47144 | -1.99115 | -1.4639743 | MAP7D3 |
| 1.79E-02 | 3.908504 | -1.022229 | 1.4637676 | GIMAP2 |
| 4.21E-02 | 3.308508 | -2.34675 | 1.4623722 | BCAS4 |
| 3.65E-04 | 6.435907 | 4.490843 | 1.4611919 | ARHGDIB |
| 1.10E-02 | -4.24763 | -0.262778 | -1.4611228 | ARHGEF16 |
| 3.90E-02 | -3.36422 | -2.225603 | -1.4609244 | C12orf28 |
| 2.41E-02 | -3.70509 | -1.475296 | -1.4603687 | HMX1 |
| 2.71E-02 | 3.617258 | -1.669889 | 1.4599386 | NPL |
| 3.97E-02 | -3.35094 | -2.254535 | -1.4597127 | RAB15 |
| 1.64E-04 | 6.921784 | 5.472879 | 1.4535119 | PQLC3 |
| 1.18E-02 | -4.19911 | -0.371571 | -1.4524256 | MSX1 |
| 7.24E-03 | 4.528184 | 0.366 | 1.4520249 | KIAA0408 |
| 1.16E-02 | 4.213031 | -0.340354 | 1.4512983 | SCN9A |
| 2.63E-03 | 5.216172 | 1.893454 | 1.4503514 | FLJ32255 |
| 1.28E-02 | 4.134497 | -0.516419 | 1.4499927 | SVEP1 |
| 3.35E-03 | 5.059558 | 1.548566 | 1.4496874 | APOL6 |
| 4.85E-02 | -3.20703 | -2.566045 | -1.4478924 | CREM |
| 3.56E-02 | 3.426042 | -2.090623 | 1.4461882 | HORMAD1 |
| 3.52E-03 | -5.02599 | 1.474391 | -1.4460119 | SPATA24 |
| 2.70E-04 | 6.621636 | 4.870061 | 1.4454344 | TRIM34 |
| 2.73E-03 | 5.196308 | 1.849825 | 1.4452801 | RNASET2 |
| 2.27E-02 | -3.74082 | -1.395916 | -1.4443456 | PIM1 |
| 5.74E-03 | -4.6815 | 0.708734 | -1.4423549 | LOC100129098 |
| 3.60E-02 | -3.41747 | -2.109379 | -1.4417388 | MAGEB17 |
| 4.94E-02 | 3.192561 | -2.597149 | 1.4415995 | TPTE2P1 |
| 5.37E-03 | 4.732695 | 0.822961 | 1.4412666 | IGF1 |
| 2.19E-02 | 3.764853 | -1.342483 | 1.44006 | LOC100240735 |
| 1.88E-02 | 3.870001 | -1.108191 | 1.4366471 | PDCD1LG2 |
| 2.39E-03 | -5.2775 | 2.027922 | -1.4356693 | PLA2G4F |
| 2.41E-02 | 3.705148 | -1.475156 | 1.4356513 | ZC3HAV1 |
| 6.32E-03 | -4.61656 | 0.563669 | -1.4354064 | STARD10 |
| 3.84E-03 | 4.95943 | 1.327052 | 1.4353395 | ARHGAP4 |
| 9.50E-03 | 4.343896 | -0.046901 | 1.434325 | NOTCH2NL |
| 6.17E-03 | 4.630515 | 0.594866 | 1.4335368 | GINS2 |
| 1.51E-03 | 5.552124 | 2.625675 | 1.4335191 | PIK3R5 |
| 1.56E-02 | 4.004016 | -0.808674 | 1.4319891 | SPAG4 |
| 1.62E-02 | -3.97633 | -0.870614 | -1.4304057 | LOC113230 |
| 1.14E-02 | 4.223535 | -0.316799 | 1.4293076 | C18orf54 |
| 5.80E-03 | 4.673046 | 0.689865 | 1.4289951 | SPATA18 |
| 6.76E-03 | 4.575 | 0.470751 | 1.4288993 | PTN |
| 4.79E-02 | -3.21548 | -2.547854 | -1.4284929 | C1orf172 |
| 5.90E-03 | 4.659626 | 0.659898 | 1.4282526 | KIF21B |
| 4.03E-02 | 3.341011 | -2.276136 | 1.4265578 | SNORA28 |
| 2.91E-02 | 3.570315 | -1.77358 | 1.4264616 | ADAMDEC1 |
| 6.69E-03 | 4.581792 | 0.485941 | 1.4254656 | CYBA |
| 3.70E-03 | 4.985239 | 1.38422 | 1.4245107 | VAC14 |
| 3.32E-03 | 5.067691 | 1.566526 | 1.4239801 | FAM159A |
| 3.75E-02 | 3.388882 | -2.171829 | 1.4229712 | LOC91450 |
| 1.29E-03 | 5.651495 | 2.840036 | 1.422434 | GPR160 |
| 6.10E-03 | -4.63763 | 0.610773 | -1.4223728 | TRPC4 |
| 2.62E-02 | -3.64229 | -1.6145 | -1.4208528 | BEST3 |
| 4.66E-03 | 4.830655 | 1.041134 | 1.4204503 | IKBKE |
| 1.91E-03 | 5.403967 | 2.304131 | 1.41971 | EAF2 |
| 2.10E-02 | 3.793062 | -1.2797 | 1.4195113 | VSIG4 |
| 2.41E-02 | 3.702511 | -1.48101 | 1.4168092 | PIK3R1 |
| 3.54E-02 | 3.430337 | -2.081223 | 1.4156568 | CD68 |
| 2.48E-02 | -3.67908 | -1.532983 | -1.414658 | MRGPRF |
| 2.58E-03 | 5.228472 | 1.92045 | 1.4144207 | ZSWIM5 |
| 1.85E-02 | -3.88663 | -1.071067 | -1.4111373 | FAM78B |
| 3.16E-02 | 3.510585 | -1.905157 | 1.410982 | UNC13C |
| 8.09E-03 | -4.45184 | 0.19504 | -1.4108076 | C6orf204 |
| 1.68E-02 | 3.947045 | -0.936103 | 1.410411 | TNFSF8 |
| 1.63E-02 | 3.969843 | -0.885127 | 1.4103997 | C1orf110 |
| 9.13E-03 | 4.375064 | 0.022975 | 1.4103858 | HLA-F |
| 1.85E-02 | 3.887274 | -1.069637 | 1.410238 | PLB1 |
| 2.47E-03 | 5.254705 | 1.977986 | 1.4089679 | LPXN |
| 3.46E-03 | -5.04046 | 1.506378 | -1.4084588 | S100A7A |
| 6.79E-03 | -4.57109 | 0.462013 | -1.4082509 | C8orf71 |
| 2.06E-02 | -3.80871 | -1.244841 | -1.4070163 | XLOC_005730 |
| 1.68E-02 | 3.949079 | -0.931557 | 1.4060073 | SH3TC1 |
| 1.37E-03 | 5.615014 | 2.761465 | 1.4056277 | WDR54 |
| 5.19E-03 | -4.75719 | 0.877568 | -1.4052261 | RP1-177G6.2 |
| 4.01E-02 | 3.344332 | -2.268912 | 1.4044763 | LOC283028 |
| 1.20E-03 | 5.7007 | 2.945777 | 1.4044247 | P2RY14 |
| 3.13E-03 | 5.103589 | 1.645732 | 1.4038571 | ARHGAP15 |
| 1.63E-02 | 3.969635 | -0.885593 | 1.4013984 | PDIA2 |
| 2.92E-03 | 5.15409 | 1.756985 | 1.4011359 | VAV3 |
| 3.31E-02 | -3.47567 | -1.981862 | -1.4005109 | LOC729887 |
| 2.53E-03 | -5.2394 | 1.94442 | -1.3998147 | MARVELD2 |
| 8.33E-03 | -4.43488 | 0.157044 | -1.3996799 | TMEM171 |
| 3.70E-02 | 3.398315 | -2.151234 | 1.3988576 | GALNT3 |
| 6.79E-04 | 6.055344 | 3.699526 | 1.3983663 | LOC401320 |
| 4.62E-02 | -3.24141 | -2.491948 | -1.3981225 | OR1L6 |
| 5.68E-03 | -4.68952 | 0.726635 | -1.3979592 | XLOC_003641 |
| 2.00E-02 | -3.82887 | -1.199927 | -1.3965806 | CYP4F30P |
| 2.85E-02 | 3.584467 | -1.742346 | 1.3957944 | ISLR2 |
| 2.69E-02 | 3.623172 | -1.656809 | 1.3957217 | NCF4 |
| 1.32E-02 | 4.116449 | -0.55687 | 1.394783 | C1S |
| 8.11E-03 | -4.44988 | 0.190645 | -1.3945691 | PKLR |
| 5.60E-03 | 4.696681 | 0.742623 | 1.3944962 | SUSD5 |
| 1.12E-02 | -4.23455 | -0.29211 | -1.3923924 | TFE3 |
| 2.57E-02 | 3.655443 | -1.585374 | 1.3918093 | CD300A |
| 2.99E-02 | 3.549624 | -1.819206 | 1.3914614 | LOC100129196 |
| 7.75E-03 | 4.484353 | 0.267864 | 1.3908693 | C6orf26 |
| 2.46E-02 | 3.68868 | -1.511699 | 1.3898417 | CD300C |
| 3.77E-04 | 6.4127 | 4.443132 | 1.389611 | OXER1 |
| 4.95E-04 | -6.23999 | 4.085827 | -1.3889554 | PTPRU |
| 3.23E-02 | 3.492388 | -1.945155 | 1.3875552 | FKBP5 |
| 4.05E-03 | 4.925114 | 1.250968 | 1.3875423 | STARD5 |
| 7.68E-03 | -4.4902 | 0.280966 | -1.3867903 | C1orf127 |
| 4.46E-02 | -3.26498 | -2.441029 | -1.3864902 | NLRP14 |
| 1.03E-02 | 4.291803 | -0.16371 | 1.3863421 | NRADDP |
| 5.59E-03 | 4.698573 | 0.746844 | 1.3855097 | F13A1 |
| 1.72E-02 | -3.93318 | -0.967095 | -1.3846839 | OSBPL6 |
| 3.86E-02 | 3.37137 | -2.210027 | 1.3844769 | P2RY1 |
| 1.39E-02 | 4.079963 | -0.638621 | 1.3841241 | C7orf63 |
| 4.51E-03 | -4.85004 | 1.084241 | -1.383392 | ATXN7L2 |
| 8.37E-03 | -4.43269 | 0.152127 | -1.3826052 | NPC1L1 |
| 4.99E-03 | -4.78325 | 0.935623 | -1.3813862 | NACC2 |
| 8.02E-03 | -4.45893 | 0.210912 | -1.380268 | LOC645261 |
| 9.58E-03 | 4.340214 | -0.055158 | 1.3797138 | GHRL |
| 3.17E-02 | 3.508274 | -1.910239 | 1.3785894 | C1QTNF3 |
| 1.12E-02 | 4.236271 | -0.288239 | 1.376538 | C4orf50 |
| 1.50E-02 | -4.02899 | -0.752778 | -1.3749896 | LOC642980 |
| 4.66E-02 | 3.23522 | -2.505307 | 1.3741823 | ANKRD20A5P |
| 1.76E-02 | 3.919971 | -0.996612 | 1.3737673 | LOC284630 |
| 3.25E-02 | -3.48792 | -1.954976 | -1.3713838 | GNAO1 |
| 1.08E-02 | 4.259269 | -0.236669 | 1.3701724 | LOC144571 |
| 2.98E-02 | 3.552566 | -1.812723 | 1.3697172 | ENKUR |
| 1.23E-02 | -4.16461 | -0.448912 | -1.3696779 | GPX3 |
| 8.02E-03 | 4.459575 | 0.212365 | 1.3693301 | VNN2 |
| 4.87E-02 | 3.202642 | -2.575475 | 1.3676023 | RYR3 |
| 3.80E-02 | 3.382077 | -2.186679 | 1.3660889 | DPYD |
| 5.57E-03 | 4.702434 | 0.75546 | 1.3641835 | ATHL1 |
| 7.39E-03 | -4.51426 | 0.334827 | -1.3605873 | LOC554207 |
| 2.26E-02 | 3.74666 | -1.382941 | 1.3599345 | EFHC1 |
| 2.43E-02 | 3.697486 | -1.492162 | 1.3579232 | CDYL2 |
| 4.87E-02 | 3.202295 | -2.576223 | 1.3575861 | PRKACB |
| 6.85E-03 | -4.56303 | 0.443972 | -1.357545 | CACNA2D3 |
| 3.41E-03 | -5.04788 | 1.522766 | -1.3574028 | VANGL2 |
| 1.80E-04 | 6.860832 | 5.351477 | 1.357067 | TRIM4 |
| 1.30E-02 | -4.12785 | -0.531316 | -1.3567223 | WNT3A |
| 4.00E-02 | -3.34552 | -2.266323 | -1.3564746 | FAM46B |
| 2.47E-02 | 3.684866 | -1.520159 | 1.3560699 | C9orf68 |
| 2.89E-02 | -3.57453 | -1.764273 | -1.3555913 | PCBP3 |
| 2.37E-02 | -3.71429 | -1.45485 | -1.3555126 | H1FNT |
| 1.36E-02 | 4.096258 | -0.602114 | 1.3552442 | KIF11 |
| 1.84E-02 | -3.88868 | -1.066495 | -1.3550732 | KIAA1958 |
| 2.35E-02 | 3.720843 | -1.440309 | 1.3545644 | SYNGAP1 |
| 4.45E-02 | -3.26695 | -2.436777 | -1.3542645 | GPX6 |
| 4.10E-03 | -4.91666 | 1.232216 | -1.3537971 | FNDC5 |
| 1.14E-02 | 4.2194 | -0.326071 | 1.3514237 | CD200R1 |
| 2.34E-03 | -5.28969 | 2.054622 | -1.3506806 | KRTAP4-12 |
| 5.57E-03 | 4.70374 | 0.758375 | 1.3499217 | STAB1 |
| 3.17E-03 | 5.093513 | 1.623512 | 1.3494126 | ZMYND15 |
| 3.03E-04 | -6.55151 | 4.727427 | -1.348043 | GYLTL1B |
| 4.13E-02 | 3.323242 | -2.314762 | 1.3461963 | CCL23 |
| 2.93E-04 | -6.57343 | 4.77208 | -1.346101 | FBLIM1 |
| 2.01E-02 | 3.827536 | -1.2029 | 1.3454641 | TP53INP1 |
| 2.29E-02 | 3.735289 | -1.408215 | 1.3441253 | GSDMB |
| 1.74E-02 | 3.925628 | -0.983971 | 1.3419668 | UTS2D |
| 9.73E-04 | -5.81699 | 3.194582 | -1.3410552 | TTYH1 |
| 1.72E-03 | 5.471742 | 2.451503 | 1.3390058 | C12orf35 |
| 2.61E-02 | -3.64603 | -1.606225 | -1.3384723 | NUDT4 |
| 2.84E-02 | -3.58694 | -1.736884 | -1.3324816 | LOC100128843 |
| 2.62E-03 | 5.220459 | 1.902864 | 1.3322445 | TXNIP |
| 2.91E-02 | 3.570929 | -1.772225 | 1.3308954 | XLOC_004366 |
| 4.68E-02 | -3.23103 | -2.514345 | -1.328991 | GPR4 |
| 7.90E-03 | -4.4696 | 0.234822 | -1.3244935 | SNORA76 |
| 1.04E-02 | 4.284142 | -0.180889 | 1.3223508 | LOC284108 |
| 4.79E-02 | -3.21551 | -2.54779 | -1.3220207 | OR10A2 |
| 4.53E-02 | -3.25536 | -2.461832 | -1.3216357 | SLC2A13 |
| 3.60E-02 | -3.41792 | -2.108396 | -1.3183518 | MRPS6 |
| 4.27E-02 | -3.29823 | -2.36904 | -1.3181453 | MYOT |
| 1.60E-02 | 3.984769 | -0.851739 | 1.3175473 | PCYOX1L |
| 2.70E-03 | 5.202027 | 1.862388 | 1.316702 | ZGLP1 |
| 2.66E-02 | 3.631416 | -1.638572 | 1.315367 | PVT1 |
| 1.43E-02 | 4.057698 | -0.688493 | 1.3152232 | XAF1 |
| 1.72E-03 | -5.47284 | 2.453882 | -1.3151322 | MET |
| 1.30E-04 | -7.06188 | 5.749946 | -1.3139115 | BAG1 |
| 3.58E-02 | 3.420162 | -2.103486 | 1.312873 | ARHGAP33 |
| 3.00E-03 | -5.13162 | 1.707513 | -1.3127533 | MYO19 |
| 2.21E-02 | 3.758976 | -1.355554 | 1.3116071 | SIRPD |
| 4.16E-02 | 3.316527 | -2.329344 | 1.3104478 | LOC645249 |
| 5.54E-04 | 6.173838 | 3.947926 | 1.3104166 | STK4 |
| 2.70E-02 | 3.619925 | -1.663992 | 1.3103832 | CA5B |
| 1.63E-02 | 3.973135 | -0.877764 | 1.3089012 | AKT1S1 |
| 3.30E-02 | -3.47899 | -1.974585 | -1.3079712 | SYT3 |
| 1.06E-02 | 4.268686 | -0.21555 | 1.3060833 | COL4A3 |
| 3.23E-02 | 3.494226 | -1.941117 | 1.3060084 | DGKA |
| 4.56E-02 | -3.25146 | -2.470255 | -1.3057069 | XLOC_010337 |
| 2.02E-02 | 3.82232 | -1.214525 | 1.3052314 | SPOCK2 |
| 2.73E-02 | 3.611022 | -1.683677 | 1.3049675 | KLRG1 |
| 2.02E-02 | 3.821367 | -1.21665 | 1.304388 | XLOC_002275 |
| 3.36E-02 | 3.464348 | -2.006707 | 1.3038224 | RTP4 |
| 6.66E-03 | -4.58468 | 0.492411 | -1.3030334 | HMOX2 |
| 7.24E-03 | 4.528632 | 0.367001 | 1.3027467 | OSBPL3 |
| 2.47E-02 | -3.68609 | -1.517433 | -1.3022517 | LOC100129461 |
| 4.24E-03 | -4.8935 | 1.1808 | -1.3009029 | ATP1A4 |
| 3.00E-02 | 3.547623 | -1.823616 | 1.3000039 | SLC24A1 |
| 1.74E-02 | -3.92722 | -0.980412 | -1.2987122 | OR5K3 |
| 7.75E-03 | 4.48277 | 0.26432 | 1.2985449 | C1orf96 |
| 8.48E-03 | -4.4215 | 0.127056 | -1.2982638 | MTFP1 |
| 2.89E-02 | 3.57499 | -1.763264 | 1.2981125 | LOC100132111 |
| 1.47E-02 | 4.04131 | -0.725191 | 1.2979278 | RBM43 |
| 3.06E-02 | -3.53523 | -1.850926 | -1.2978805 | LOC729995 |
| 2.48E-03 | -5.25256 | 1.973275 | -1.2961451 | PIM3 |
| 1.93E-02 | 3.8554 | -1.140769 | 1.2959437 | FCHO1 |
| 2.91E-02 | 3.569029 | -1.776418 | 1.2955773 | AVIL |
| 1.55E-02 | -4.00526 | -0.805883 | -1.2948271 | PTH1R |
| 4.37E-03 | -4.87411 | 1.137742 | -1.294548 | MEX3D |
| 4.02E-02 | -3.34372 | -2.27024 | -1.294276 | KRTAP4-7 |
| 1.98E-02 | -3.83569 | -1.184721 | -1.2938412 | FLJ44054 |
| 6.09E-04 | -6.12044 | 3.836215 | -1.2937295 | RBM38 |
| 8.94E-03 | -4.39009 | 0.056658 | -1.2936047 | FOXI3 |
| 1.69E-02 | 3.945257 | -0.9401 | 1.2927899 | CMA1 |
| 1.43E-02 | -4.05834 | -0.687053 | -1.2919427 | PARD6B |
| 3.48E-03 | 5.036669 | 1.497995 | 1.2874415 | FOXN2 |
| 9.69E-04 | -5.82059 | 3.202258 | -1.286935 | C9orf3 |
| 2.91E-02 | -3.56891 | -1.776682 | -1.2853898 | PVRL1 |
| 2.48E-02 | 3.679466 | -1.532133 | 1.2842915 | NFE2L3 |
| 4.77E-03 | -4.81251 | 1.000767 | -1.283874 | FAM89A |
| 9.82E-04 | 5.811222 | 3.18228 | 1.2835789 | DQX1 |
| 3.81E-02 | 3.378653 | -2.194147 | 1.2835526 | CHD5 |
| 1.19E-02 | -4.18947 | -0.393189 | -1.2818009 | SLC36A4 |
| 4.20E-02 | -3.31119 | -2.34092 | -1.2816679 | FAM167B |
| 4.40E-03 | 4.869696 | 1.127931 | 1.2809991 | LOC283050 |
| 2.58E-02 | -3.65255 | -1.591787 | -1.280593 | CEACAM1 |
| 5.05E-03 | -4.77514 | 0.917548 | -1.2796153 | TLCD1 |
| 4.88E-02 | -3.20168 | -2.577554 | -1.2793477 | FOXD3 |
| 2.51E-03 | -5.24512 | 1.95696 | -1.2793177 | KCNJ15 |
| 5.93E-03 | 4.656151 | 0.652138 | 1.2785989 | COL5A2 |
| 1.73E-02 | -3.93182 | -0.970128 | -1.2773103 | LOC100131831 |
| 1.42E-02 | 4.064912 | -0.672336 | 1.277238 | GZMM |
| 3.17E-02 | -3.50659 | -1.913948 | -1.2763461 | NFIL3 |
| 1.32E-02 | -4.11383 | -0.562748 | -1.276319 | TPD52 |
| 2.11E-02 | 3.788605 | -1.289625 | 1.2756203 | SYT17 |
| 9.49E-03 | 4.346992 | -0.039961 | 1.2750849 | SH2D2A |
| 7.95E-03 | 4.464945 | 0.224394 | 1.2748588 | ZBTB37 |
| 3.30E-02 | 3.477819 | -1.977148 | 1.2733478 | ARHGAP21 |
| 2.53E-02 | 3.665447 | -1.56321 | 1.2729255 | C2orf43 |
| 3.58E-03 | -5.00947 | 1.437849 | -1.2727722 | LOC100129516 |
| 4.86E-02 | 3.20641 | -2.567372 | 1.2717312 | CTSC |
| 2.27E-02 | -3.74149 | -1.394431 | -1.2702997 | NANP |
| 2.09E-02 | 3.797698 | -1.269377 | 1.2699867 | PPP6R2 |
| 1.39E-02 | -4.07716 | -0.644911 | -1.269337 | LOC100128946 |
| 4.20E-03 | 4.899574 | 1.194289 | 1.2693027 | PTPN18 |
| 3.93E-02 | 3.357722 | -2.239766 | 1.2682169 | COL6A5 |
| 2.92E-02 | -3.56557 | -1.784054 | -1.2679099 | PYGO1 |
| 4.73E-03 | 4.820908 | 1.019451 | 1.2679025 | LOC284276 |
| 2.80E-02 | -3.59689 | -1.714911 | -1.2676632 | TTC9B |
| 4.15E-02 | 3.319056 | -2.323853 | 1.2671644 | STAG2 |
| 4.91E-02 | 3.196031 | -2.589692 | 1.2670803 | SHCBP1 |
| 4.44E-03 | 4.861245 | 1.10915 | 1.2659491 | CYTL1 |
| 1.88E-02 | 3.870689 | -1.106656 | 1.2652613 | CXCR2 |
| 4.84E-03 | 4.800677 | 0.974427 | 1.2647983 | C20orf94 |
| 2.10E-02 | 3.791272 | -1.283685 | 1.2639153 | ANKAR |
| 3.06E-02 | 3.534595 | -1.852317 | 1.2635379 | BCL2L11 |
| 8.44E-03 | -4.42508 | 0.135086 | -1.2613199 | CCDC69 |
| 4.66E-02 | 3.234486 | -2.506889 | 1.2608478 | SLCO2B1 |
| 8.81E-03 | -4.39796 | 0.074293 | -1.2603467 | DNAJB5 |
| 3.31E-02 | 3.475339 | -1.982592 | 1.2596737 | ZNF546 |
| 1.19E-02 | 4.188661 | -0.394997 | 1.2588239 | SPN |
| 2.79E-02 | -3.59728 | -1.714047 | -1.2588154 | LOC100506650 |
| 1.22E-02 | -4.17155 | -0.433358 | -1.2582995 | LOC729451 |
| 4.34E-02 | 3.286439 | -2.394595 | 1.2581759 | FAM54A |
| 2.20E-02 | 3.76149 | -1.349963 | 1.2579125 | MFSD4 |
| 2.45E-02 | 3.68963 | -1.509591 | 1.2571412 | COL4A4 |
| 8.60E-04 | -5.90039 | 3.372052 | -1.2567316 | CDKN3 |
| 3.14E-02 | 3.516408 | -1.892348 | 1.2566012 | SCARNA10 |
| 2.01E-02 | 3.827282 | -1.203466 | 1.2563318 | BDNF-AS1 |
| 1.23E-02 | 4.166392 | -0.444922 | 1.2558669 | AMIGO2 |
| 9.41E-03 | 4.353233 | -0.025969 | 1.2557967 | HOGA1 |
| 7.45E-03 | 4.508793 | 0.322591 | 1.2554808 | TRAF5 |
| 1.65E-03 | 5.503194 | 2.519733 | 1.2550812 | GRAP2 |
| 3.02E-02 | 3.542205 | -1.835555 | 1.2548486 | GAB3 |
| 3.69E-02 | 3.399688 | -2.148235 | 1.2546377 | LOC283731 |
| 5.43E-03 | 4.72307 | 0.801496 | 1.2542487 | C11orf65 |
| 4.59E-02 | 3.24722 | -2.479411 | 1.2542238 | XLOC_006925 |
| 2.54E-02 | 3.664851 | -1.564531 | 1.2541791 | EPB41 |
| 3.33E-03 | -5.0645 | 1.559484 | -1.2534541 | RASGRP2 |
| 2.87E-02 | -3.57949 | -1.75334 | -1.2532076 | BCAR1 |
| 3.32E-02 | 3.473299 | -1.987069 | 1.2518211 | ATP8B3 |
| 2.12E-02 | 3.784732 | -1.298247 | 1.2515519 | PYDC1 |
| 2.91E-02 | 3.570259 | -1.773705 | 1.2514303 | LOC100130930 |
| 9.94E-04 | -5.80462 | 3.168203 | -1.2513698 | PHF21B |
| 1.06E-02 | 4.26835 | -0.216302 | 1.2492466 | RNF213 |
| 8.96E-03 | -4.38869 | 0.05351 | -1.2492072 | LOC651337 |
| 1.91E-03 | -5.40562 | 2.307738 | -1.2489549 | CD59 |
| 4.77E-03 | -4.81322 | 1.002343 | -1.2487651 | WNT3 |
| 1.95E-02 | 3.847815 | -1.157685 | 1.2477418 | DMXL2 |
| 5.28E-03 | 4.744374 | 0.849 | 1.2469134 | RHEBL1 |
| 6.36E-03 | -4.61204 | 0.553572 | -1.2467772 | PRB1 |
| 2.17E-02 | -3.77067 | -1.329536 | -1.246538 | C7orf54 |
| 1.34E-02 | -4.10621 | -0.579807 | -1.2452758 | PLEKHO1 |
| 1.93E-02 | -3.85544 | -1.140682 | -1.2437224 | LOC392196 |
| 3.67E-03 | -4.99345 | 1.402394 | -1.2435645 | LOC100128851 |
| 2.81E-02 | -3.59324 | -1.722969 | -1.2426265 | NQO2 |
| 1.38E-02 | -4.08287 | -0.632103 | -1.241688 | C8orf39 |
| 5.12E-03 | -4.76569 | 0.89651 | -1.2406429 | JMJD6 |
| 1.10E-02 | -4.2454 | -0.267761 | -1.2401561 | CABLES2 |
| 3.52E-03 | 5.025738 | 1.47383 | 1.2381889 | SFI1 |
| 1.36E-02 | 4.091422 | -0.612949 | 1.237504 | HLA-J |
| 3.49E-02 | -3.43803 | -2.064386 | -1.2370872 | HSD3B2 |
| 4.65E-02 | -3.23728 | -2.500862 | -1.2366044 | NAMPT |
| 5.02E-03 | 4.778527 | 0.925103 | 1.2363214 | UBA7 |
| 3.02E-03 | -5.12406 | 1.690857 | -1.2362392 | RTN4RL2 |
| 2.76E-03 | 5.190251 | 1.836514 | 1.2345095 | KNTC1 |
| 2.62E-02 | 3.642246 | -1.614599 | 1.2339862 | MDK |
| 3.24E-02 | 3.491863 | -1.946309 | 1.2328332 | C12orf54 |
| 5.43E-03 | -4.7242 | 0.804014 | -1.2327705 | UBE2QL1 |
| 3.55E-02 | -3.42712 | -2.088268 | -1.2327269 | LGI3 |
| 5.05E-03 | 4.776088 | 0.919671 | 1.2323004 | MLLT3 |
| 1.87E-03 | 5.425493 | 2.350986 | 1.2321107 | ATXN7L1 |
| 2.69E-03 | 5.204105 | 1.866953 | 1.2317234 | OLFML1 |
| 4.11E-02 | 3.32586 | -2.309074 | 1.2315264 | TMEM108 |
| 4.26E-02 | 3.300553 | -2.364006 | 1.2310617 | LOC729324 |
| 1.19E-02 | -4.18714 | -0.398397 | -1.2294055 | CA13 |
| 3.42E-02 | 3.451547 | -2.034772 | 1.2289574 | PDE6G |
| 4.00E-03 | 4.935183 | 1.273301 | 1.228146 | TNFRSF9 |
| 3.14E-03 | 5.100727 | 1.639422 | 1.2278214 | ZFP36L2 |
| 4.45E-02 | 3.266434 | -2.437892 | 1.2272023 | LOC221442 |
| 3.51E-02 | -3.43476 | -2.071549 | -1.2270125 | RAB3IP |
| 3.16E-02 | 3.50932 | -1.907938 | 1.2265159 | SMOC2 |
| 9.36E-03 | -4.35748 | -0.016454 | -1.2260418 | PITPNM2 |
| 2.01E-02 | 3.826814 | -1.204509 | 1.2255981 | RASEF |
| 3.24E-02 | 3.491655 | -1.946765 | 1.2253192 | GPR114 |
| 9.41E-03 | -4.35357 | -0.025214 | -1.2251565 | MOSPD1 |
| 1.84E-02 | 3.891424 | -1.060371 | 1.2239767 | IL4 |
| 2.08E-03 | 5.356193 | 2.199973 | 1.2234641 | OSBPL7 |
| 3.81E-02 | 3.379763 | -2.191726 | 1.2234312 | NTM |
| 4.30E-02 | -3.29341 | -2.3795 | -1.2218091 | CENPN |
| 2.50E-02 | -3.6737 | -1.544921 | -1.2217031 | EMX1 |
| 5.11E-04 | 6.219658 | 4.043497 | 1.2215497 | LOC727869 |
| 6.85E-03 | 4.563394 | 0.44479 | 1.2213861 | MXRA8 |
| 1.24E-02 | -4.15507 | -0.470307 | -1.2209969 | PYGM |
| 2.57E-02 | -3.65459 | -1.587259 | -1.2191325 | RNF6 |
| 8.68E-03 | 4.407068 | 0.094712 | 1.2189655 | DRD4 |
| 2.57E-02 | 3.654685 | -1.587055 | 1.2179764 | ZNF596 |
| 1.53E-02 | 4.01533 | -0.783352 | 1.2175198 | SLFN12L |
| 2.36E-02 | 3.716991 | -1.448863 | 1.2167632 | GGTLC1 |
| 4.05E-02 | 3.338217 | -2.282212 | 1.215994 | MSH5 |
| 4.80E-02 | -3.21469 | -2.549551 | -1.2152722 | LCE3B |
| 1.67E-02 | -3.95531 | -0.917631 | -1.2143399 | PLK2 |
| 4.54E-02 | 3.253792 | -2.465217 | 1.2141973 | RASSF4 |
| 4.81E-03 | -4.80682 | 0.988101 | -1.2137253 | C15orf59 |
| 1.47E-02 | 4.038815 | -0.730779 | 1.2127035 | ZNF599 |
| 2.05E-02 | 3.812606 | -1.236171 | 1.2123966 | TEX21P |
| 8.65E-03 | 4.40902 | 0.099085 | 1.2123776 | DDX60 |
| 1.47E-02 | -4.04108 | -0.725717 | -1.2122001 | KRTAP12-1 |
| 8.08E-03 | 4.453338 | 0.198391 | 1.2118581 | UNC93B1 |
| 4.22E-02 | 3.306216 | -2.351723 | 1.211415 | CASP1 |
| 2.48E-02 | 3.680616 | -1.529583 | 1.2112362 | CHST15 |
| 3.15E-02 | 3.513884 | -1.897899 | 1.2092445 | C10orf57 |
| 4.67E-02 | 3.233795 | -2.508382 | 1.2084405 | PPIH |
| 2.57E-02 | 3.656858 | -1.582241 | 1.2079263 | KIAA1598 |
| 2.00E-02 | -3.83069 | -1.19588 | -1.2033317 | GFI1B |
| 1.40E-02 | -4.07439 | -0.651112 | -1.2032485 | ATXN2L |
| 2.20E-02 | -3.76318 | -1.346197 | -1.2031553 | DBNDD2 |
| 1.52E-02 | 4.01897 | -0.775207 | 1.2027065 | NOTCH2 |
| 9.16E-03 | 4.372533 | 0.017301 | 1.2026414 | TMED8 |
| 1.47E-02 | -4.04104 | -0.725792 | -1.2024993 | TMEM38A |
| 9.96E-03 | -4.31056 | -0.121647 | -1.2020991 | SGMS2 |
| 5.74E-03 | -4.68359 | 0.713408 | -1.2010076 | XLOC_002049 |
| 3.82E-02 | 3.376854 | -2.198071 | 1.2001541 | LY86 |
| 2.06E-02 | 3.809072 | -1.244045 | 1.1987843 | LOC100128402 |
| 1.03E-03 | -5.78075 | 3.11722 | -1.1976473 | FURIN |
| 3.34E-03 | 5.061931 | 1.553806 | 1.1972517 | TRIM11 |
| 1.88E-02 | 3.871736 | -1.104318 | 1.1972046 | EML4 |
| 8.58E-03 | -4.41356 | 0.109254 | -1.1964975 | TRIP13 |
| 6.55E-03 | 4.594085 | 0.513432 | 1.1964076 | MR1 |
| 2.63E-02 | 3.640744 | -1.617925 | 1.1951078 | PPP1R32 |
| 1.07E-02 | -4.26644 | -0.220596 | -1.1950455 | TCOF1 |
| 1.33E-02 | 4.110248 | -0.570765 | 1.1918001 | TTC39B |
| 3.38E-02 | -3.45976 | -2.016768 | -1.1916647 | SSTR1 |
| 4.81E-03 | -4.80756 | 0.989752 | -1.1912277 | SPC24 |
| 4.80E-02 | -3.21356 | -2.551983 | -1.1909056 | CACNG4 |
| 1.87E-02 | -3.87521 | -1.096563 | -1.1906365 | KIAA0895 |
| 3.15E-02 | 3.512502 | -1.90094 | 1.1897833 | RYR1 |
| 1.76E-02 | -3.91949 | -0.997696 | -1.1882265 | CHEK2 |
| 3.46E-02 | -3.44486 | -2.049426 | -1.18714 | KCNJ11 |
| 2.71E-02 | 3.617993 | -1.668265 | 1.1868754 | FLJ45513 |
| 2.54E-02 | -3.66429 | -1.565763 | -1.1863853 | TESC |
| 6.88E-03 | 4.561048 | 0.43954 | 1.1859148 | C1orf35 |
| 9.91E-03 | -4.31567 | -0.110188 | -1.1835695 | LOC157381 |
| 3.68E-02 | 3.403859 | -2.139123 | 1.1834198 | SPICE1 |
| 1.91E-02 | 3.863689 | -1.122276 | 1.1832215 | RNU2-2 |
| 1.99E-02 | 3.83351 | -1.189583 | 1.1830799 | NAV1 |
| 2.61E-02 | -3.64505 | -1.608399 | -1.1807078 | PYY2 |
| 1.10E-02 | 4.246443 | -0.26543 | 1.1806434 | TRMT5 |
| 5.15E-03 | -4.76239 | 0.889152 | -1.1802405 | AGAP3 |
| 3.87E-02 | 3.369249 | -2.214651 | 1.1799156 | C5orf54 |
| 7.75E-03 | 4.483249 | 0.265391 | 1.1796821 | FAM115C |
| 1.34E-02 | 4.107404 | -0.577139 | 1.1788255 | DNAH1 |
| 3.60E-03 | 5.004867 | 1.427665 | 1.1786657 | LOC728392 |
| 1.56E-02 | 4.00135 | -0.81464 | 1.1782384 | MELK |
| 3.20E-03 | -5.08769 | 1.610668 | -1.1777378 | TMEM40 |
| 8.77E-03 | -4.40101 | 0.081134 | -1.1769763 | ATP5G1 |
| 4.63E-02 | -3.2389 | -2.497371 | -1.1757941 | TRIM10 |
| 1.11E-02 | -4.23816 | -0.283993 | -1.1754185 | GABRR3 |
| 2.09E-02 | 3.794395 | -1.276732 | 1.1754087 | HLA-A |
| 3.38E-02 | -3.46103 | -2.013987 | -1.1753915 | SMCR8 |
| 9.79E-03 | -4.3234 | -0.092849 | -1.1744943 | MSI2 |
| 3.58E-03 | 5.010909 | 1.441033 | 1.1739613 | SRGAP2P2 |
| 8.70E-03 | 4.405274 | 0.09069 | 1.1735327 | LOC100652917 |
| 1.19E-02 | -4.1906 | -0.390654 | -1.1733223 | TONSL |
| 3.67E-02 | 3.405636 | -2.135241 | 1.1724181 | TRIM22 |
| 7.70E-03 | 4.488524 | 0.277206 | 1.1708307 | BOC |
| 4.57E-04 | -6.28923 | 4.188081 | -1.170346 | AVEN |
| 9.99E-03 | -4.30858 | -0.126094 | -1.1685196 | ABLIM2 |
| 2.13E-02 | -3.78066 | -1.307318 | -1.1682245 | DGKD |
| 3.57E-02 | 3.424224 | -2.094599 | 1.1672832 | IGFLR1 |
| 3.92E-02 | 3.361383 | -2.231791 | 1.1671371 | TNNC2 |
| 9.63E-03 | -4.33616 | -0.064257 | -1.1669292 | CEL |
| 5.25E-03 | 4.749088 | 0.859508 | 1.1652078 | PPM1N |
| 1.16E-02 | -4.20773 | -0.35224 | -1.1651518 | AMD1 |
| 2.83E-03 | 5.171106 | 1.794421 | 1.165137 | FUT4 |
| 3.58E-02 | 3.420542 | -2.102654 | 1.1648353 | ZNF385C |
| 9.91E-03 | -4.3159 | -0.109668 | -1.1647724 | GRAMD4 |
| 2.10E-02 | -3.7926 | -1.280737 | -1.1615753 | LOC100130348 |
| 1.66E-02 | -3.95845 | -0.910606 | -1.1603463 | LINC00346 |
| 4.03E-03 | -4.92961 | 1.260947 | -1.1598738 | LMF2 |
| 1.23E-02 | -4.1614 | -0.456109 | -1.1593745 | S100A16 |
| 4.99E-02 | 3.184508 | -2.614446 | 1.1591104 | LOC100130872 |
| 8.11E-03 | 4.450123 | 0.19119 | 1.158133 | LOC645431 |
| 5.87E-03 | -4.66386 | 0.669355 | -1.1567872 | MTMR9LP |
| 1.34E-02 | 4.10789 | -0.57605 | 1.1561768 | FLJ10661 |
| 3.18E-02 | 3.504391 | -1.918775 | 1.1557254 | THBS3 |
| 5.24E-03 | -4.74963 | 0.860705 | -1.1541753 | SPRY3 |
| 1.66E-03 | -5.49526 | 2.502522 | -1.1538042 | LOC645769 |
| 2.17E-02 | -3.77221 | -1.326125 | -1.1536609 | CHST1 |
| 1.08E-02 | 4.256103 | -0.243766 | 1.1517488 | AP1S3 |
| 4.10E-02 | 3.328012 | -2.304397 | 1.1516361 | DCAF5 |
| 4.27E-02 | 3.298977 | -2.367423 | 1.150447 | MAMDC2 |
| 3.68E-02 | -3.40422 | -2.138333 | -1.1497788 | ACTN3 |
| 3.26E-03 | -5.0772 | 1.587508 | -1.149135 | PTDSS1 |
| 4.99E-02 | -3.18503 | -2.613327 | -1.1483051 | C15orf37 |
| 2.95E-02 | 3.561281 | -1.793507 | 1.1482018 | DDX31 |
| 1.95E-02 | 3.846118 | -1.16147 | 1.1478844 | FAM19A2 |
| 3.31E-03 | -5.06894 | 1.569293 | -1.1474147 | RIMKLA |
| 2.99E-02 | -3.55144 | -1.81521 | -1.1472199 | PCP4L1 |
| 4.93E-02 | 3.194003 | -2.594049 | 1.1471565 | CD70 |
| 5.56E-03 | 4.705557 | 0.762429 | 1.1464889 | MIS18BP1 |
| 2.44E-03 | -5.26325 | 1.996721 | -1.1450742 | GTPBP6 |
| 1.33E-02 | -4.11047 | -0.570269 | -1.1443579 | SLC6A18 |
| 3.38E-02 | 3.460467 | -2.015216 | 1.1441373 | C7orf41 |
| 1.04E-02 | 4.285139 | -0.178654 | 1.1430831 | C5orf39 |
| 5.97E-03 | -4.65119 | 0.641049 | -1.141282 | ADRB1 |
| 3.57E-02 | 3.422656 | -2.09803 | 1.1409785 | ZNF441 |
| 4.74E-02 | 3.223293 | -2.53102 | 1.1405863 | NRG1 |
| 1.22E-02 | -4.17263 | -0.430944 | -1.1399346 | LOC388780 |
| 2.01E-02 | 3.825636 | -1.207134 | 1.1386521 | CIRBP |
| 2.78E-03 | 5.184675 | 1.824258 | 1.1385935 | LIG1 |
| 3.15E-02 | -3.51477 | -1.895941 | -1.1363509 | USP31 |
| 1.41E-03 | -5.59873 | 2.726345 | -1.1362577 | MPP2 |
| 1.17E-03 | -5.71567 | 2.97789 | -1.1356969 | ESRRA |
| 1.99E-02 | -3.83217 | -1.19256 | -1.1355002 | RNF126 |
| 1.66E-03 | 5.497748 | 2.507925 | 1.1352807 | XLOC_003482 |
| 2.08E-02 | 3.800466 | -1.263214 | 1.1348461 | BRCA2 |
| 1.43E-02 | -4.05833 | -0.687069 | -1.1323411 | CCDC85C |
| 1.26E-02 | -4.14932 | -0.483191 | -1.131871 | RASL10B |
| 2.09E-02 | 3.796738 | -1.271516 | 1.1317169 | MN1 |
| 2.52E-02 | 3.66915 | -1.555003 | 1.1306279 | ZNF624 |
| 7.11E-03 | 4.538069 | 0.388123 | 1.1301251 | REEP4 |
| 3.03E-02 | -3.54159 | -1.836909 | -1.1299988 | MYPN |
| 3.02E-02 | 3.54318 | -1.833407 | 1.1299937 | NKAPP1 |
| 2.09E-02 | 3.794852 | -1.275715 | 1.1296995 | TMEM154 |
| 4.18E-03 | -4.90444 | 1.205095 | -1.1293064 | AURKA |
| 1.98E-02 | 3.836971 | -1.181867 | 1.1281226 | TNFSF13 |
| 3.20E-02 | 3.499264 | -1.930045 | 1.1275102 | LINC00256A |
| 1.61E-02 | 3.981552 | -0.858937 | 1.1271168 | SLC25A45 |
| 3.30E-03 | -5.07075 | 1.573285 | -1.1268972 | NUP98 |
| 1.32E-02 | -4.11818 | -0.55298 | -1.1263563 | UMOD |
| 2.71E-02 | 3.617949 | -1.668362 | 1.125745 | PTK6 |
| 2.48E-02 | 3.682358 | -1.52572 | 1.1250314 | MB21D1 |
| 1.32E-02 | -4.11494 | -0.560247 | -1.1246514 | LPCAT3 |
| 3.95E-02 | 3.354062 | -2.247735 | 1.124418 | POLR2F |
| 1.91E-02 | 3.863744 | -1.122154 | 1.1243637 | NAAA |
| 1.66E-02 | -3.96058 | -0.905848 | -1.1238803 | PROSER1 |
| 7.39E-03 | 4.513624 | 0.333407 | 1.1238536 | MARVELD1 |
| 3.00E-02 | 3.549179 | -1.820188 | 1.1235481 | LGI4 |
| 1.49E-02 | -4.03233 | -0.745301 | -1.1222415 | RASGRP3 |
| 3.66E-02 | 3.406564 | -2.133214 | 1.1217272 | MAML3 |
| 2.16E-02 | -3.77282 | -1.324762 | -1.1216644 | XLOC_005365 |
| 3.95E-02 | -3.35474 | -2.24625 | -1.1208403 | MMACHC |
| 1.28E-02 | 4.137639 | -0.509377 | 1.1202768 | DHX58 |
| 2.08E-02 | 3.800512 | -1.26311 | 1.1202621 | PARP10 |
| 2.73E-02 | 3.611333 | -1.682989 | 1.119319 | MUC12 |
| 3.19E-03 | -5.09071 | 1.617323 | -1.1189003 | C20orf85 |
| 3.11E-02 | -3.5227 | -1.878508 | -1.1180414 | ZNF774 |
| 2.09E-02 | 3.798516 | -1.267556 | 1.1176785 | RAD21-AS1 |
| 1.27E-03 | -5.66501 | 2.86911 | -1.1175449 | TRMU |
| 9.08E-03 | 4.378612 | 0.030928 | 1.1167201 | PLXDC2 |
| 1.99E-02 | 3.831659 | -1.193709 | 1.1162809 | A2LD1 |
| 4.16E-02 | 3.316496 | -2.329412 | 1.1161108 | LOC100131929 |
| 3.05E-02 | 3.536346 | -1.848461 | 1.1136969 | FRAT1 |
| 2.63E-02 | -3.63918 | -1.621391 | -1.1134925 | GLIS2 |
| 9.50E-03 | 4.343878 | -0.046943 | 1.1133604 | C5orf25 |
| 4.07E-02 | -3.33336 | -2.292782 | -1.1133324 | SLC4A1 |
| 4.56E-02 | 3.250492 | -2.472344 | 1.1125964 | ALCAM |
| 1.46E-02 | -4.0457 | -0.715351 | -1.1124562 | GPT |
| 9.07E-03 | -4.38087 | 0.035995 | -1.1113193 | CDRT3 |
| 3.63E-02 | -3.4122 | -2.120904 | -1.1099174 | NTRK3 |
| 1.50E-03 | 5.557713 | 2.637759 | 1.1098727 | TMPRSS3 |
| 2.61E-02 | 3.645297 | -1.607846 | 1.1095642 | SH3BP5 |
| 4.65E-02 | 3.23634 | -2.502891 | 1.1095368 | CERCAM |
| 8.04E-03 | 4.457641 | 0.208032 | 1.1085303 | MICAL1 |
| 4.33E-03 | -4.8811 | 1.153257 | -1.1079687 | GTF2IRD1 |
| 4.95E-04 | 6.241519 | 4.088999 | 1.1075172 | TTC14 |
| 4.80E-02 | -3.21352 | -2.552059 | -1.1068493 | TM4SF1 |
| 4.57E-03 | 4.84199 | 1.066344 | 1.1051422 | EDEM1 |
| 2.12E-02 | -3.78467 | -1.298392 | -1.1048626 | ENO3 |
| 2.81E-02 | 3.594481 | -1.72023 | 1.1030649 | SNORD17 |
| 6.35E-03 | 4.613203 | 0.556174 | 1.1026602 | SYNRG |
| 3.38E-02 | 3.46088 | -2.014313 | 1.1022874 | LOC440104 |
| 3.17E-02 | -3.50683 | -1.913421 | -1.1014058 | FAAH |
| 4.98E-03 | -4.78456 | 0.938541 | -1.1002379 | PDE4A |
| 2.67E-02 | 3.628921 | -1.644091 | 1.0989 | LINC00204B |
| 3.02E-02 | 3.543188 | -1.83339 | 1.0983242 | LOC100129363 |
| 3.41E-02 | -3.45565 | -2.025786 | -1.097479 | SORCS1 |
| 2.89E-02 | 3.574106 | -1.765215 | 1.0972044 | CLDN3 |
| 4.42E-02 | 3.274437 | -2.420579 | 1.0970519 | LOC100505648 |
| 4.19E-02 | 3.312882 | -2.337258 | 1.0967887 | GPX8 |
| 1.97E-02 | -3.84105 | -1.172773 | -1.0967519 | CDX1 |
| 1.70E-02 | -3.94172 | -0.947997 | -1.0966979 | DYRK3 |
| 3.15E-02 | 3.51197 | -1.90211 | 1.0961875 | TLR6 |
| 1.28E-02 | 4.137102 | -0.510582 | 1.0955663 | HMGN2 |
| 4.95E-02 | 3.190266 | -2.602079 | 1.0951846 | ATAD5 |
| 6.61E-03 | -4.58888 | 0.5018 | -1.0951382 | LARP6 |
| 3.02E-02 | -3.54451 | -1.830467 | -1.0943399 | LOC100129463 |
| 1.66E-02 | 3.958355 | -0.910817 | 1.0942639 | GLB1L |
| 2.49E-02 | -3.67843 | -1.534425 | -1.0940927 | TFF1 |
| 3.72E-02 | -3.39485 | -2.158808 | -1.0940472 | RHOV |
| 1.57E-02 | -3.99675 | -0.824944 | -1.0937653 | KRBA1 |
| 9.79E-03 | 4.323524 | -0.092581 | 1.0932422 | RAB8B |
| 4.89E-02 | 3.200109 | -2.580923 | 1.0929302 | IQCC |
| 4.87E-02 | -3.20305 | -2.574604 | -1.0929228 | CELA3A |
| 1.55E-02 | -4.00583 | -0.804619 | -1.0924206 | CPO |
| 1.59E-02 | 3.987416 | -0.845818 | 1.0914133 | CACNA2D4 |
| 3.33E-02 | -3.47 | -1.9943 | -1.0902463 | XLOC_007290 |
| 1.08E-02 | -4.2597 | -0.235695 | -1.0892706 | LOC100127983 |
| 1.90E-03 | 5.41317 | 2.324169 | 1.0887541 | MYO5A |
| 1.07E-02 | -4.2655 | -0.222688 | -1.0885798 | TMEM198 |
| 2.16E-03 | -5.33734 | 2.158807 | -1.0882725 | GRIK3 |
| 7.62E-03 | -4.49543 | 0.292659 | -1.0877146 | GLTPD1 |
| 2.73E-02 | -3.61225 | -1.680962 | -1.0876987 | FKBP4 |
| 2.68E-02 | 3.627267 | -1.64775 | 1.087525 | CNOT6L |
| 4.28E-02 | 3.296403 | -2.373004 | 1.0872161 | HIGD1C |
| 1.22E-02 | 4.169106 | -0.438838 | 1.0865379 | PPM1M |
| 7.30E-03 | -4.52357 | 0.355666 | -1.0857163 | ASB2 |
| 7.32E-03 | -4.52133 | 0.350661 | -1.0854984 | GPR45 |
| 1.29E-02 | -4.13165 | -0.5228 | -1.0846347 | CTRC |
| 9.96E-03 | 4.311468 | -0.119614 | 1.0836364 | TLR3 |
| 2.52E-02 | 3.668651 | -1.556108 | 1.0832294 | DNALI1 |
| 1.12E-02 | 4.236075 | -0.28868 | 1.0830349 | HLA-E |
| 7.07E-03 | 4.54397 | 0.401329 | 1.0815921 | C6orf192 |
| 2.95E-03 | -5.14421 | 1.735245 | -1.0815247 | NPPA |
| 3.45E-02 | 3.445649 | -2.047695 | 1.0813384 | UBE2L6 |
| 1.74E-02 | 3.924917 | -0.985561 | 1.0811952 | IRAK3 |
| 1.11E-02 | -4.2406 | -0.278538 | -1.0805453 | KLHDC8B |
| 9.16E-03 | -4.37299 | 0.018334 | -1.0803004 | TUSC1 |
| 4.47E-02 | -3.26356 | -2.444116 | -1.0800416 | XLOC_004558 |
| 3.79E-03 | 4.967478 | 1.344884 | 1.0790628 | C16orf47 |
| 1.68E-02 | -3.9513 | -0.926598 | -1.0787172 | B4GALT6 |
| 2.17E-03 | -5.33412 | 2.151765 | -1.0777661 | OCIAD2 |
| 4.20E-03 | -4.9008 | 1.197005 | -1.0771094 | AIG1 |
| 1.44E-02 | -4.05364 | -0.697582 | -1.0769483 | GATA4 |
| 5.10E-03 | 4.768012 | 0.901678 | 1.0759445 | KCNIP4 |
| 4.21E-03 | 4.898561 | 1.19204 | 1.0754775 | FAM49A |
| 2.08E-02 | -3.80061 | -1.262901 | -1.0752992 | UAP1 |
| 1.25E-03 | -5.67806 | 2.897161 | -1.0751142 | GLYAT |
| 2.32E-02 | -3.72893 | -1.422345 | -1.0729326 | COX5A |
| 2.99E-02 | 3.55009 | -1.818181 | 1.0726141 | IFIH1 |
| 1.28E-02 | -4.13679 | -0.511284 | -1.0725003 | ACR |
| 4.46E-04 | -6.30575 | 4.222334 | -1.0721288 | IFRD2 |
| 3.62E-02 | 3.413576 | -2.117886 | 1.0720797 | PIK3CD |
| 1.39E-02 | 4.078437 | -0.642041 | 1.0712376 | HHAT |
| 1.26E-02 | 4.146275 | -0.49002 | 1.0710243 | GOLM1 |
| 1.19E-02 | 4.192645 | -0.386063 | 1.0707019 | KLRF1 |
| 4.50E-02 | 3.26067 | -2.450354 | 1.0704264 | ANKRD55 |
| 9.38E-03 | 4.355382 | -0.021149 | 1.0695903 | PGBD2 |
| 7.41E-03 | 4.511874 | 0.329488 | 1.0694038 | YPEL1 |
| 2.68E-02 | -3.62833 | -1.645406 | -1.0686651 | LOC100132339 |
| 3.24E-02 | 3.489921 | -1.950574 | 1.0680957 | ZNF575 |
| 2.12E-02 | 3.783791 | -1.300341 | 1.0676372 | LOC100288069 |
| 4.51E-02 | 3.258257 | -2.455569 | 1.0668459 | SCPEP1 |
| 3.54E-02 | -3.42976 | -2.082484 | -1.0665625 | XLOC_001775 |
| 5.99E-03 | -4.64848 | 0.634997 | -1.0659898 | INO80D |
| 1.61E-02 | -3.97874 | -0.865237 | -1.0637024 | PITPNM1 |
| 4.08E-02 | 3.331634 | -2.296525 | 1.0635494 | LOC440900 |
| 1.89E-02 | -3.86908 | -1.11025 | -1.0621382 | RHEB |
| 1.03E-02 | 4.29001 | -0.16773 | 1.0619609 | PILRA |
| 1.95E-03 | -5.3943 | 2.283075 | -1.0615896 | HEPN1 |
| 2.92E-02 | -3.56728 | -1.780269 | -1.0602601 | CRY1 |
| 2.59E-02 | 3.649286 | -1.599013 | 1.0602469 | OLFML2B |
| 4.31E-02 | -3.29258 | -2.381284 | -1.0600793 | XLOC_003457 |
| 1.54E-02 | -4.0113 | -0.79238 | -1.0597522 | FNDC9 |
| 1.64E-02 | 3.965063 | -0.895816 | 1.0595592 | STK10 |
| 1.60E-02 | -3.98451 | -0.852327 | -1.0591899 | EIF4EBP2 |
| 3.55E-02 | 3.42652 | -2.089577 | 1.0590854 | ZNF589 |
| 4.43E-02 | 3.271033 | -2.427944 | 1.0589477 | MORN3 |
| 2.77E-03 | -5.18833 | 1.832295 | -1.0589159 | H2AFZ |
| 3.33E-02 | 3.47141 | -1.991214 | 1.0588273 | C11orf35 |
| 3.60E-02 | 3.416618 | -2.111236 | 1.0584554 | PDZRN4 |
| 7.24E-03 | -4.52838 | 0.366448 | -1.0570842 | HRH2 |
| 2.36E-02 | 3.718699 | -1.44507 | 1.0566206 | MTMR11 |
| 3.80E-02 | -3.38066 | -2.189766 | -1.0564265 | LOC284669 |
| 1.73E-02 | 3.928435 | -0.977699 | 1.0562413 | KIAA1257 |
| 9.06E-04 | -5.86673 | 3.300526 | -1.0559483 | ZNF219 |
| 5.39E-03 | -4.73 | 0.81696 | -1.0557792 | AIDA |
| 1.29E-02 | -4.13282 | -0.520187 | -1.055626 | LOC100130430 |
| 4.88E-02 | -3.2009 | -2.579217 | -1.0552 | FAM36A |
| 2.61E-03 | -5.22216 | 1.906599 | -1.0551431 | EGLN1 |
| 4.35E-02 | -3.28495 | -2.397809 | -1.0548596 | SLC6A9 |
| 3.82E-02 | 3.376347 | -2.199176 | 1.0542169 | ERI2 |
| 4.91E-02 | 3.196207 | -2.589313 | 1.0537817 | LRFN1 |
| 1.41E-02 | -4.06842 | -0.664473 | -1.0537803 | PPPDE2 |
| 1.68E-02 | 3.951154 | -0.926918 | 1.0536413 | TPSD1 |
| 2.80E-02 | 3.594982 | -1.719124 | 1.0536192 | SLC10A2 |
| 3.11E-03 | -5.10751 | 1.654378 | -1.0534104 | SLC5A10 |
| 1.54E-02 | -4.01184 | -0.791154 | -1.0532703 | SREBF1 |
| 4.32E-02 | 3.289438 | -2.388099 | 1.0530404 | C3orf71 |
| 2.05E-02 | -3.81055 | -1.240742 | -1.0513887 | KIAA1217 |
| 2.87E-02 | 3.580184 | -1.751801 | 1.0505604 | CATSPER2 |
| 7.33E-03 | -4.51948 | 0.346526 | -1.0489568 | LOC100507199 |
| 3.87E-02 | -3.3699 | -2.213241 | -1.0486581 | LOC286087 |
| 6.39E-03 | -4.60775 | 0.543995 | -1.0483462 | ENDOG |
| 6.00E-03 | 4.647447 | 0.632694 | 1.0479427 | DUSP18 |
| 1.74E-02 | 3.926101 | -0.982915 | 1.047175 | RINL |
| 1.12E-02 | -4.23487 | -0.291393 | -1.0470412 | PDE4DIP |
| 7.70E-03 | 4.488228 | 0.276542 | 1.0467099 | DNASE1 |
| 4.32E-02 | 3.289326 | -2.388341 | 1.0465498 | PDXK |
| 6.71E-03 | -4.57836 | 0.478263 | -1.0453648 | ERCC2 |
| 3.37E-02 | 3.463527 | -2.008507 | 1.0449923 | XLOC_013282 |
| 2.42E-02 | -3.69855 | -1.489799 | -1.0443547 | TUBB2A |
| 4.62E-02 | -3.24175 | -2.491222 | -1.0426998 | TRIM47 |
| 5.85E-03 | 4.66737 | 0.677191 | 1.0423136 | ZNF217 |
| 1.41E-02 | -4.07171 | -0.657104 | -1.0419101 | RANBP6 |
| 3.44E-02 | 3.447579 | -2.043466 | 1.0418753 | NUAK2 |
| 2.14E-02 | -3.77986 | -1.309087 | -1.0418505 | ZACN |
| 9.14E-03 | 4.374629 | 0.022 | 1.0417187 | NBPF6 |
| 5.72E-03 | -4.68585 | 0.718443 | -1.0414757 | SPHK1 |
| 3.62E-02 | 3.413851 | -2.117287 | 1.0408994 | FKTN |
| 2.05E-02 | 3.814022 | -1.233016 | 1.0405766 | AKAP10 |
| 1.29E-02 | 4.130686 | -0.524962 | 1.0400277 | RMRP |
| 2.70E-02 | 3.620479 | -1.662766 | 1.0396358 | N4BP2L1 |
| 3.30E-02 | -3.47766 | -1.977495 | -1.0394345 | SYPL2 |
| 1.59E-02 | -3.98929 | -0.841632 | -1.0390205 | DEFA7P |
| 1.89E-03 | -5.4171 | 2.332732 | -1.0388304 | GTF3A |
| 2.36E-02 | 3.7182 | -1.446177 | 1.0379018 | C9orf174 |
| 1.25E-02 | 4.153118 | -0.474681 | 1.0369259 | SRGAP2 |
| 3.60E-03 | 5.005781 | 1.429687 | 1.0364552 | ZNF226 |
| 1.79E-02 | 3.908034 | -1.023278 | 1.0348292 | ATL1 |
| 3.68E-02 | 3.403165 | -2.14064 | 1.0345958 | FAM111A |
| 2.91E-02 | 3.571321 | -1.77136 | 1.033451 | DPRXP4 |
| 1.19E-02 | -4.19458 | -0.381734 | -1.0329571 | METTL21A |
| 4.30E-02 | -3.29359 | -2.379109 | -1.0324758 | IRS1 |
| 4.29E-02 | 3.296221 | -2.373399 | 1.032156 | AHSA2 |
| 3.79E-03 | 4.968231 | 1.346552 | 1.0312142 | RAB30 |
| 6.84E-03 | 4.565335 | 0.449133 | 1.0306188 | CMAHP |
| 4.21E-02 | -3.30774 | -2.348406 | -1.0305176 | S1PR3 |
| 1.63E-02 | -3.96947 | -0.885958 | -1.0303969 | NIPSNAP3B |
| 4.68E-02 | 3.231059 | -2.51428 | 1.0302599 | FAM24B |
| 2.09E-02 | -3.79479 | -1.275853 | -1.0302572 | ZNF154 |
| 3.10E-02 | -3.52424 | -1.875109 | -1.0292297 | ABCG1 |
| 6.96E-03 | 4.553398 | 0.422425 | 1.0288992 | SLC40A1 |
| 3.21E-02 | 3.498594 | -1.931517 | 1.0277901 | SNORD15A |
| 2.41E-02 | 3.702399 | -1.481259 | 1.0272835 | CORO7 |
| 4.76E-02 | 3.220612 | -2.536797 | 1.0257342 | PARP11 |
| 1.11E-02 | -4.24068 | -0.278343 | -1.0253376 | HSBP1L1 |
| 1.03E-02 | -4.2889 | -0.170215 | -1.0250616 | COMTD1 |
| 9.65E-03 | 4.334535 | -0.067891 | 1.0248988 | KIAA0513 |
| 1.19E-02 | 4.189019 | -0.394193 | 1.0245262 | WAS |
| 5.45E-03 | 4.718944 | 0.792292 | 1.0243756 | LOC550112 |
| 1.63E-02 | -3.97156 | -0.881282 | -1.0242043 | LOC100129826 |
| 1.58E-02 | -3.9909 | -0.838016 | -1.0238513 | TCP11L2 |
| 3.12E-02 | 3.520753 | -1.882787 | 1.0237298 | APCDD1 |
| 1.35E-02 | 4.102243 | -0.588703 | 1.0235372 | LOC100129034 |
| 1.68E-02 | 3.947571 | -0.934929 | 1.0229236 | FNBP1 |
| 3.58E-03 | -5.01279 | 1.445193 | -1.0228509 | UTP11L |
| 9.65E-03 | -4.33388 | -0.06936 | -1.0226444 | PPIL1 |
| 2.75E-02 | 3.60606 | -1.694647 | 1.021873 | ACCS |
| 7.54E-03 | 4.502475 | 0.308446 | 1.0216529 | CEP164 |
| 4.52E-03 | -4.84858 | 1.080999 | -1.0216139 | ADCK3 |
| 3.98E-03 | 4.938226 | 1.280047 | 1.0213915 | NHLRC3 |
| 2.06E-02 | -3.80725 | -1.248107 | -1.0212662 | FLJ40606 |
| 3.41E-02 | -3.45462 | -2.028035 | -1.0190766 | PPM1J |
| 3.33E-02 | 3.47033 | -1.993584 | 1.0178334 | HIST1H3H |
| 4.57E-02 | 3.249129 | -2.475288 | 1.0176796 | ZNF169 |
| 3.56E-02 | -3.42517 | -2.092526 | -1.0171407 | AQP7 |
| 2.58E-03 | -5.22921 | 1.922077 | -1.0169856 | PPP1CC |
| 4.18E-03 | 4.904533 | 1.205298 | 1.0155421 | RHOBTB1 |
| 1.31E-02 | -4.12247 | -0.543369 | -1.0152951 | IDH2 |
| 3.69E-02 | 3.399807 | -2.147974 | 1.0151397 | CAMTA1 |
| 2.03E-02 | 3.819486 | -1.220841 | 1.0134258 | C5orf56 |
| 1.46E-02 | -4.04642 | -0.713756 | -1.0133777 | TJP2 |
| 4.94E-02 | 3.191243 | -2.599981 | 1.0129742 | EFCAB6 |
| 1.86E-02 | 3.880851 | -1.083975 | 1.0119147 | MGC34800 |
| 1.21E-02 | 4.178311 | -0.418201 | 1.0112009 | XRCC3 |
| 3.79E-02 | 3.383427 | -2.183732 | 1.0108826 | C8orf31 |
| 1.12E-02 | 4.230108 | -0.302061 | 1.0107133 | PPP4R1L |
| 9.13E-03 | -4.37574 | 0.024495 | -1.010563 | SLC43A3 |
| 1.68E-02 | 3.950663 | -0.928016 | 1.0103686 | ZNF594 |
| 4.74E-03 | -4.81919 | 1.015619 | -1.0098297 | CHAC2 |
| 2.34E-02 | 3.723972 | -1.433357 | 1.0097314 | SFMBT2 |
| 1.61E-03 | -5.51771 | 2.551181 | -1.0088767 | FERMT2 |
| 5.46E-03 | -4.71714 | 0.788261 | -1.008641 | LPHN1 |
| 5.57E-03 | -4.70251 | 0.755629 | -1.0084499 | FER1L5 |
| 4.06E-02 | 3.336391 | -2.286185 | 1.0083298 | WDR5B |
| 2.21E-02 | -3.75703 | -1.359878 | -1.0079966 | GGN |
| 1.31E-02 | -4.12406 | -0.539819 | -1.0076829 | PRDX6 |
| 1.36E-02 | 4.094488 | -0.606079 | 1.007663 | BACH2 |
| 1.91E-02 | 3.862699 | -1.124486 | 1.0075903 | APBB3 |
| 4.65E-02 | 3.236625 | -2.502277 | 1.0074341 | PIK3R6 |
| 4.38E-02 | -3.28024 | -2.408009 | -1.0071218 | LOC338797 |
| 8.22E-03 | -4.44288 | 0.174952 | -1.0066689 | USP2 |
| 1.36E-02 | 4.093823 | -0.607569 | 1.0043997 | TTC18 |
| 2.64E-02 | -3.63736 | -1.625418 | -1.0043485 | APOBEC2 |
| 3.67E-03 | -4.99132 | 1.397686 | -1.0042455 | DLEU1 |
| 3.58E-02 | -3.42007 | -2.103687 | -1.0031995 | OR6K2 |
| 2.20E-02 | -3.75994 | -1.353421 | -1.0026491 | RRP12 |
| 4.73E-02 | -3.22408 | -2.52932 | -1.0018568 | NRG4 |
| 3.24E-02 | -3.49028 | -1.949775 | -1.0018181 | TUBA3C |
| 6.39E-03 | -4.60807 | 0.544702 | -1.0016811 | PRLHR |
| 1.63E-02 | 3.970378 | -0.883931 | 1.0013027 | PARP4 |
| 1.24E-02 | -4.15579 | -0.468684 | -1.0012615 | LARGE |
| 2.42E-02 | 3.699214 | -1.488328 | 1.0011177 | FLT3LG |

Supplementary Table 2 | Differentially expressed genes in GSE95849

| adj.P.Val | t | B | logFC | Gene_symbol |
| --- | --- | --- | --- | --- |
| 0.005204 | 4.9976093 | 1.18003 | 1.6634368 | IL2RG |
| 0.001338 | 6.8699774 | 4.52818 | 1.8165897 | PREPL |
| 0.002913 | 5.6406444 | 2.38714 | 2.4118975 | CREB5 |
| 0.022809 | 3.718698 | -1.344 | 1.3887419 | TSPO |
| 0.002448 | 5.846092 | 2.76078 | 1.7482365 | CYTIP |
| 0.009649 | 4.424303 | 0.0628 | 1.2517734 | XPC |
| 0.012605 | 4.2020221 | -0.37801 | 1.2066479 | HSD17B3 |
| 0.016814 | 3.9648321 | -0.85132 | 1.406116 | CSTB |
| 0.015852 | 4.01001 | -0.76101 | 1.7918009 | IER2 |
| 0.014335 | 4.0968605 | -0.58757 | 1.2808766 | RASA1 |
| 0.024916 | 3.6383318 | -1.50485 | 1.0074911 | GATA1 |
| 0.003546 | 5.3904856 | 1.92408 | 4.8977039 | CXCR2 |
| 0.011951 | 4.2455608 | -0.29142 | 1.8593121 | MAPK3 |
| 0.021634 | 3.7583621 | -1.26458 | 1.0725279 | NF2 |
| 0.002913 | 5.641574 | 2.38884 | 2.1033639 | MX2 |
| 0.024818 | 3.6408708 | -1.49977 | 1.7777341 | MYBPH |
| 0.018848 | 3.873065 | -1.03494 | 2.0596178 | NCF2 |
| 0.010383 | -4.3680693 | -0.0484 | -1.1548704 | ROS1 |
| 0.035926 | 3.3523438 | -2.0754 | 1.1752938 | TRIM21 |
| 0.024539 | 3.6508868 | -1.47972 | 1.0668827 | ALOX12 |
| 0.002868 | 5.6523534 | 2.4086 | 2.6277447 | TNFRSF8 |
| 0.007494 | 4.6663493 | 0.53845 | 1.9291476 | FGR |
| 0.04337 | 3.2030866 | -2.37098 | 1.8523071 | GP1BA |
| 0.026249 | 3.597933 | -1.58565 | 1.0479794 | IGFBP4 |
| 0.002044 | 6.1299794 | 3.26683 | 1.9271685 | ARHGAP25 |
| 0.001222 | 7.139081 | 4.96593 | 3.6943234 | KCNJ2 |
| 0.013174 | 4.165672 | -0.45038 | 1.1777837 | DCLRE1A |
| 0.006226 | -4.8456242 | 0.88715 | -1.5040136 | LHX2 |
| 0.046929 | 3.1489575 | -2.47762 | 1.1734601 | IRF9 |
| 0.002269 | 5.9763793 | 2.99452 | 2.7006135 | IQGAP1 |
| 0.040525 | 3.2565904 | -2.26526 | 1.3218751 | LCK |
| 0.02373 | 3.6812917 | -1.41888 | 1.167273 | PGM1 |
| 0.01144 | 4.2837331 | -0.21559 | 2.5088543 | TCN1 |
| 0.014273 | 4.1013577 | -0.5786 | 1.184265 | SP1 |
| 0.034931 | 3.3741735 | -2.03201 | 1.6461395 | VDR |
| 0.016074 | 3.9987585 | -0.78349 | 1.3688973 | GRIK3 |
| 0.001222 | 7.0615203 | 4.84091 | 1.9268016 | VPS72 |
| 0.026543 | 3.5888004 | -1.60391 | 1.1897598 | P2RY14 |
| 0.001222 | 7.475898 | 5.49816 | 2.6523447 | TCL1A |
| 0.002192 | 6.0439456 | 3.11475 | 1.6822153 | ADRB2 |
| 0.00882 | 4.505838 | 0.22359 | 1.4389955 | ST6GAL1 |
| 0.047438 | 3.1407253 | -2.49381 | 2.0254583 | TNFRSF17 |
| 0.003943 | 5.2830382 | 1.72256 | 2.4848954 | OPRL1 |
| 0.007195 | 4.7081776 | 0.6201 | 1.7761401 | EPHB3 |
| 0.000978 | 8.3891084 | 6.85567 | 4.7017686 | S100P |
| 0.00211 | 6.0729467 | 3.16614 | 1.5200516 | ZBTB6 |
| 0.002539 | 5.7824462 | 2.64569 | 1.7666759 | MECP2 |
| 0.004444 | 5.1519034 | 1.47457 | 1.9008644 | FAM63A |
| 0.012195 | 4.2290495 | -0.32424 | 1.2118801 | TBC1D13 |
| 0.005747 | 4.9077617 | 1.00721 | 1.3166651 | PKIG |
| 0.004473 | 5.1458743 | 1.46312 | 1.5543883 | LSM10 |
| 0.02175 | 3.7543271 | -1.27266 | 1.3402824 | NLK |
| 0.020407 | 3.8037201 | -1.17376 | 1.0915607 | ASXL1 |
| 0.018122 | 3.907098 | -0.96682 | 1.2462889 | NDEL1 |
| 0.017588 | 3.9306109 | -0.91978 | 1.0069445 | ST6GALNAC4 |
| 0.015725 | 4.0195004 | -0.74204 | 1.404547 | NRD1 |
| 0.001459 | 6.4976442 | 3.90407 | 2.2645417 | AHCYL1 |
| 0.002192 | 6.0311141 | 3.09197 | 1.8929925 | NUDCD3 |
| 0.009036 | 4.4770458 | 0.16688 | 1.6135867 | GATAD2B |
| 0.02417 | 3.6631758 | -1.45513 | 1.0537426 | NCSTN |
| 0.015527 | 4.03299 | -0.71509 | 1.2066369 | SPECC1L |
| 0.047583 | 3.1387376 | -2.49772 | 1.5368455 | SLC12A6 |
| 0.016151 | 3.9944715 | -0.79206 | 1.0919885 | GOLGA3 |
| 0.024324 | 3.6581217 | -1.46525 | 1.141423 | RBM23 |
| 0.01607 | 3.999554 | -0.7819 | 1.7379166 | SRGAP2 |
| 0.031337 | 3.4623501 | -1.85642 | 1.0626161 | RBM42 |
| 0.014771 | 4.0739311 | -0.63333 | 1.4220711 | TRAFD1 |
| 0.005343 | 4.9776761 | 1.14177 | 1.8172183 | UBE2T |
| 0.005653 | 4.9299165 | 1.04991 | 1.5146227 | CASP10 |
| 0.002105 | 6.0843743 | 3.18635 | 1.9065802 | TMEM164 |
| 0.002833 | 5.6817665 | 2.46242 | 2.1243614 | ATP2A3 |
| 0.003148 | 5.5441571 | 2.20957 | 1.9383298 | KRCC1 |
| 0.033574 | 3.4074124 | -1.96588 | 1.4008062 | IMPA2 |
| 0.010093 | 4.3892403 | -0.00651 | 1.1920034 | RAB14 |
| 0.039751 | 3.2722773 | -2.23422 | 1.0094718 | RAB8A |
| 0.002357 | 5.8968993 | 2.85223 | 3.7204274 | MANSC1 |
| 0.017242 | 3.9463708 | -0.88825 | 1.0109477 | CRTC1 |
| 0.004005 | 5.2538355 | 1.66753 | 1.1839746 | DNAJA3 |
| 0.028971 | 3.5256013 | -1.7302 | 1.0925405 | CAB39 |
| 0.030889 | 3.4742725 | -1.83264 | 1.2978724 | TPRA1 |
| 0.01157 | 4.2741686 | -0.23458 | 1.962528 | MON1A |
| 0.024713 | 3.6457249 | -1.49005 | 1.0715692 | DENND4B |
| 0.026444 | 3.5925839 | -1.59635 | 1.3277544 | MPDU1 |
| 0.033555 | 3.4085025 | -1.96371 | 1.3989327 | NETO2 |
| 0.002735 | 5.7137077 | 2.52072 | 1.3025288 | ASH2L |
| 0.039681 | 3.2733905 | -2.23201 | 1.0449793 | UBR7 |
| 0.003912 | 5.2893724 | 1.73449 | 1.7432398 | RNF167 |
| 0.019311 | 3.8509078 | -1.07929 | 1.2264309 | ZNF259 |
| 0.015286 | 4.0480909 | -0.68493 | 1.1199234 | SEMA4C |
| 0.047425 | 3.1411167 | -2.49304 | 1.4755151 | CYTH4 |
| 0.004143 | 5.2195339 | 1.60275 | 2.1213204 | PHF13 |
| 0.012703 | 4.1944143 | -0.39315 | 1.4904972 | MAD1L1 |
| 0.014273 | 4.1018582 | -0.5776 | 1.4703816 | ATG4C |
| 0.029619 | 3.5096221 | -1.76211 | 1.4853035 | ATP6V0B |
| 0.003451 | 5.4363829 | 2.00969 | 1.5013588 | MFSD1 |
| 0.020516 | 3.7988833 | -1.18345 | 1.7302822 | C19orf25 |
| 0.008869 | -4.5006274 | 0.21333 | -1.2203033 | TCERG1L |
| 0.02323 | 3.7029265 | -1.37557 | 1.7832063 | FES |
| 0.004194 | 5.2052679 | 1.57576 | 1.471392 | HIST1H1C |
| 0.042682 | 3.2139737 | -2.3495 | 1.2621956 | MRPL27 |
| 0.019174 | 3.8564508 | -1.06819 | 1.1512568 | HDHD3 |
| 0.001148 | 7.5971262 | 5.6855 | 1.8199521 | SMAP2 |
| 0.004651 | 5.1100414 | 1.39495 | 1.0675913 | CDIP1 |
| 0.008825 | 4.5048514 | 0.22165 | 1.2817078 | TINF2 |
| 0.011779 | 4.2579878 | -0.26672 | 1.1617348 | FUK |
| 0.024069 | 3.6655145 | -1.45045 | 1.1764 | ADAR |
| 0.022712 | 3.7218675 | -1.33765 | 1.1238942 | DNAJB12 |
| 0.006777 | 4.7615267 | 0.72399 | 1.5507573 | FAM219A |
| 0.002352 | 5.9159951 | 2.8865 | 1.5210096 | FAM220A |
| 0.004999 | 5.041036 | 1.26322 | 1.3880832 | HINFP |
| 0.016012 | 4.0024257 | -0.77616 | 1.6689042 | FAM160A2 |
| 0.001369 | 6.7015513 | 4.24852 | 2.181627 | TM9SF3 |
| 0.001345 | 6.8154601 | 4.43814 | 2.065041 | ESYT1 |
| 0.030703 | -3.4793363 | -1.82254 | -1.0265096 | A1CF |
| 0.001483 | 6.4764636 | 3.86792 | 2.040481 | C11orf54 |
| 0.04861 | 3.1223055 | -2.53 | 1.0492763 | CAMKK1 |
| 0.025953 | 3.6077798 | -1.56596 | 1.1504655 | WDR6 |
| 0.003975 | 5.2701609 | 1.69831 | 1.8121597 | GLYR1 |
| 0.023448 | 3.694277 | -1.39288 | 1.277857 | CHST2 |
| 0.033205 | 3.4169498 | -1.94689 | 1.6359665 | ACVRL1 |
| 0.001355 | 6.7548665 | 4.33752 | 2.235904 | BCORL1 |
| 0.04007 | 3.267348 | -2.24397 | 1.520918 | TESK2 |
| 0.007012 | 4.7272278 | 0.65723 | 1.8207902 | EXTL3 |
| 0.01039 | 4.3665071 | -0.05149 | 2.1284797 | HDAC5 |
| 0.002357 | 5.8987623 | 2.85558 | 4.6327954 | KRT23 |
| 0.006022 | 4.8745461 | 0.94308 | 1.5411953 | C11orf48 |
| 0.007897 | 4.611403 | 0.43093 | 1.7197593 | RGS14 |
| 0.024214 | 3.6617937 | -1.4579 | 1.0677087 | C10orf76 |
| 0.006913 | 4.7422975 | 0.68658 | 1.084175 | UBQLN1 |
| 0.009736 | 4.4182222 | 0.05079 | 1.0746569 | MRPS18A |
| 0.008241 | 4.5704336 | 0.35058 | 1.6414222 | PSMB10 |
| 0.002456 | 5.8286399 | 2.72928 | 1.7162262 | ACOT13 |
| 0.004217 | 5.1992964 | 1.56445 | 2.218037 | CD300A |
| 0.00767 | 4.6421972 | 0.49123 | 1.0717982 | C17orf75 |
| 0.015606 | -4.0269189 | -0.72722 | -1.0044351 | LINC00261 |
| 0.002698 | 5.7235811 | 2.53871 | 1.7985623 | FAM117A |
| 0.022149 | 3.7421746 | -1.29699 | 1.291058 | C12orf44 |
| 0.005118 | 5.0175731 | 1.2183 | 1.5048394 | TRMT12 |
| 0.001148 | 7.6000083 | 5.68992 | 2.1899542 | CCM2 |
| 0.002855 | 5.6714097 | 2.44348 | 1.8438702 | MLLT1 |
| 0.004364 | 5.1694381 | 1.50786 | 1.5034158 | LIMA1 |
| 0.007901 | 4.6092319 | 0.42668 | 3.0004377 | LRG1 |
| 0.048709 | 3.120525 | -2.5335 | 1.2403667 | RNF181 |
| 0.002913 | 5.6394616 | 2.38497 | 1.9400441 | UBE2R2 |
| 0.019652 | 3.8342765 | -1.11259 | 1.1529702 | CUEDC2 |
| 0.008098 | 4.5871445 | 0.38338 | 1.4103482 | DHRS7B |
| 0.030895 | 3.4732586 | -1.83467 | 1.1650554 | RABAC1 |
| 0.035985 | 3.3499974 | -2.08006 | 1.2720021 | HMGCR |
| 0.006975 | 4.7315925 | 0.66573 | 1.7100081 | ASGR1 |
| 0.041528 | 3.2353394 | -2.30729 | 1.4338349 | CHMP2A |
| 0.007609 | 4.6519641 | 0.51033 | 2.7764763 | VNN1 |
| 0.013861 | 4.1237836 | -0.53387 | 1.2302043 | WDR13 |
| 0.001447 | 6.5263831 | 3.95301 | 1.5507815 | KIAA1033 |
| 0.001338 | 6.915628 | 4.60323 | 3.42399 | CDC42EP2 |
| 0.003148 | 5.5449127 | 2.21097 | 2.791671 | GLT1D1 |
| 0.018456 | 3.8918673 | -0.9973 | 1.0913396 | CAMK2G |
| 0.007295 | 4.6928555 | 0.59021 | 1.3664295 | NUP133 |
| 0.005747 | 4.908541 | 1.00871 | 1.9136672 | STAMBP |
| 0.02282 | 3.7175107 | -1.34637 | 1.0368091 | GNPAT |
| 0.023615 | -3.6846557 | -1.41214 | -1.0738144 | SHANK2 |
| 0.011059 | 4.3147063 | -0.15413 | 1.0416676 | PTDSS2 |
| 0.038353 | 3.3011459 | -2.17702 | 1.4316651 | AGTRAP |
| 0.008239 | 4.5709367 | 0.35157 | 1.7172895 | WWC3 |
| 0.018814 | 3.8763984 | -1.02826 | 1.212879 | ARRDC1 |
| 0.002044 | 6.1287358 | 3.26464 | 1.9807194 | GTPBP2 |
| 0.012385 | 4.2165908 | -0.34902 | 1.3036139 | DNAJC1 |
| 0.003615 | 5.3733726 | 1.89209 | 2.3067275 | P2RY13 |
| 0.003401 | 5.4612857 | 2.05602 | 1.5716149 | TRAPPC6B |
| 0.024539 | 3.6510489 | -1.4794 | 1.0551234 | PRPSAP2 |
| 0.016391 | 3.9817398 | -0.81752 | 1.3459287 | HIATL1 |
| 0.024198 | 3.6622828 | -1.45692 | 1.3109309 | ZW10 |
| 0.041682 | 3.2318668 | -2.31415 | 1.2862083 | KLHDC8B |
| 0.023914 | 3.6728353 | -1.4358 | 1.0164922 | SNX5 |
| 0.016317 | 3.9877033 | -0.80559 | 1.26547 | BOLA1 |
| 0.027706 | 3.5579379 | -1.6656 | 1.1009771 | ZSWIM6 |
| 0.002948 | 5.6093654 | 2.32972 | 1.5749412 | SIN3B |
| 0.033209 | 3.4167625 | -1.94726 | 1.058403 | UBALD1 |
| 0.019311 | 3.8504245 | -1.08026 | 1.1809984 | CPNE3 |
| 0.000978 | 8.1165582 | 6.46333 | 2.1646384 | MITD1 |
| 0.016921 | 3.9585045 | -0.86398 | 1.123591 | SRBD1 |
| 0.015758 | 4.0162843 | -0.74847 | 1.8051288 | NOP10 |
| 0.007457 | 4.6716751 | 0.54886 | 1.5124802 | HIF1AN |
| 0.007904 | 4.6064758 | 0.42128 | 1.5363378 | ACSS2 |
| 0.021751 | 3.7541428 | -1.27303 | 1.2547303 | TMEM194A |
| 0.002352 | 5.9471783 | 2.94235 | 2.5641632 | CKLF |
| 0.007863 | 4.6176027 | 0.44308 | 1.0580425 | HEXIM1 |
| 0.007457 | 4.6725452 | 0.55056 | 1.4933074 | OSBPL2 |
| 0.017381 | 3.9388711 | -0.90325 | 1.0520648 | INTS9 |
| 0.002931 | 5.6302967 | 2.36816 | 2.4344763 | TSEN34 |
| 0.000978 | 8.087954 | 6.42153 | 1.9934612 | DIDO1 |
| 0.014321 | 4.0982377 | -0.58482 | 1.3426522 | SNX11 |
| 0.021627 | 3.7588859 | -1.26354 | 1.8086777 | GALNT14 |
| 0.013976 | 4.1185289 | -0.54435 | 1.3211222 | UBE2O |
| 0.018624 | 3.8838037 | -1.01344 | 1.1423237 | CPSF3 |
| 0.02323 | 3.7030477 | -1.37533 | 2.1283116 | AMICA1 |
| 0.004005 | 5.2533029 | 1.66653 | 1.8456465 | TRANK1 |
| 0.015606 | 4.0268137 | -0.72743 | 1.4488864 | COQ5 |
| 0.02354 | 3.6878914 | -1.40567 | 1.3282449 | TTC17 |
| 0.004587 | 5.1225902 | 1.41884 | 3.3632053 | KCNJ15 |
| 0.011154 | 4.3045558 | -0.17426 | 1.3441882 | CORO1C |
| 0.030751 | 3.4780033 | -1.8252 | 1.5808104 | GOLPH3 |
| 0.014956 | 4.0628752 | -0.6554 | 1.2684444 | AIFM1 |
| 0.008608 | 4.525041 | 0.26138 | 1.2266139 | RABEPK |
| 0.010313 | 4.3739262 | -0.03681 | 1.5565014 | TMEM60 |
| 0.036307 | 3.3434925 | -2.09298 | 1.5559812 | ZDHHC18 |
| 0.015344 | 4.0452791 | -0.69054 | 1.0948566 | AP2A2 |
| 0.010509 | 4.3571614 | -0.06999 | 1.2466445 | MOB2 |
| 0.006636 | 4.7844564 | 0.76855 | 2.0752575 | ABHD5 |
| 0.020127 | 3.8142193 | -1.15274 | 1.7718354 | S100A12 |
| 0.004401 | 5.1616244 | 1.49303 | 1.9607201 | METTL13 |
| 0.043281 | 3.2044532 | -2.36829 | 1.0303288 | ZNF589 |
| 0.002539 | 5.7830232 | 2.64673 | 2.690185 | RXRA |
| 0.026659 | 3.5857234 | -1.61006 | 1.790081 | BMP2K |
| 0.024984 | 3.6362505 | -1.50901 | 1.0769322 | C14orf142 |
| 0.004642 | 5.1142548 | 1.40297 | 1.6116107 | TPRG1L |
| 0.026011 | 3.6058324 | -1.56985 | 1.7865643 | BCKDK |
| 0.02215 | 3.7419751 | -1.29739 | 1.0067296 | ZNF691 |
| 0.034273 | 3.3883723 | -2.00377 | 1.4765064 | ATG16L2 |
| 0.030189 | 3.4928427 | -1.7956 | 1.0178952 | GATAD1 |
| 0.012703 | 4.1945542 | -0.39287 | 1.2438262 | SUFU |
| 0.024055 | 3.6664555 | -1.44857 | 1.2921269 | STAT1 |
| 0.037183 | 3.3264098 | -2.1269 | 1.39475 | SLC22A15 |
| 0.007802 | 4.6242527 | 0.4561 | 1.5009491 | SLC35A2 |
| 0.016391 | 3.9818684 | -0.81726 | 1.268661 | FAM134A |
| 0.031799 | 3.4517565 | -1.87754 | 1.1663322 | RMND5B |
| 0.001695 | 6.3101398 | 3.58167 | 1.5411603 | TMOD3 |
| 0.010674 | 4.3449097 | -0.09426 | 1.2203419 | CHMP6 |
| 0.005653 | 4.92947 | 1.04905 | 1.4282191 | NCEH1 |
| 0.006268 | 4.8381261 | 0.87263 | 1.6583024 | FARSA |
| 0.002868 | 5.6548905 | 2.41324 | 2.0513628 | C7orf43 |
| 0.012924 | 4.1823616 | -0.41714 | 2.5315348 | NLRC4 |
| 0.027413 | -3.5670637 | -1.64736 | -1.377225 | DSCR4 |
| 0.008608 | 4.5243369 | 0.26 | 1.2834887 | TFEB |
| 0.005295 | 4.983921 | 1.15376 | 1.3387285 | ZNF641 |
| 0.023914 | 3.6730975 | -1.43528 | 1.8105476 | SAC3D1 |
| 0.010992 | 4.3200032 | -0.14363 | 1.0821243 | FAM213B |
| 0.040265 | 3.2612507 | -2.25604 | 1.4237656 | GIN1 |
| 0.011488 | 4.2799496 | -0.2231 | 1.743028 | MIR17HG |
| 0.030347 | 3.4873762 | -1.8065 | 1.0603599 | VEZT |
| 0.001864 | 6.2218528 | 3.428 | 1.6873726 | TRAPPC1 |
| 0.00767 | 4.6412674 | 0.48941 | 1.283474 | NSL1 |
| 0.007348 | 4.6875953 | 0.57995 | 2.6706158 | PPCDC |
| 0.028561 | 3.5369644 | -1.7075 | 1.2830725 | ARRDC3 |
| 0.043814 | 3.1962685 | -2.38443 | 1.1740029 | STYK1 |
| 0.003647 | 5.3615915 | 1.87004 | 1.401908 | YWHAG |
| 0.049173 | 3.1137798 | -2.54674 | 1.0052688 | CEP170 |
| 0.001996 | 6.1563538 | 3.31323 | 1.245839 | LRIF1 |
| 0.010251 | 4.3802074 | -0.02438 | 1.2574464 | ZNF248 |
| 0.003834 | 5.3163473 | 1.7852 | 2.5375803 | ARAP3 |
| 0.024539 | 3.6506757 | -1.48015 | 1.0624177 | MCRS1 |
| 0.007967 | 4.600276 | 0.40913 | 3.5076603 | IL1R2 |
| 0.007609 | 4.6519111 | 0.51023 | 1.3774655 | PRSS23 |
| 0.001148 | 7.619705 | 5.72014 | 2.3171294 | TOLLIP |
| 0.048127 | 3.1295156 | -2.51584 | 1.2653036 | TMEM204 |
| 0.023503 | 3.6897676 | -1.40191 | 1.3475402 | ARFGAP1 |
| 0.006524 | 4.7987903 | 0.79638 | 1.695064 | FOS |
| 0.010718 | 4.3422678 | -0.0995 | 1.0777851 | PEX12 |
| 0.001222 | 7.0996769 | 4.90253 | 1.8230237 | PSMA5 |
| 0.023473 | 3.6923583 | -1.39673 | 1.533769 | TRPS1 |
| 0.014771 | 4.0724607 | -0.63627 | 1.2474268 | PANK4 |
| 0.025749 | 3.6133316 | -1.55486 | 1.1824038 | ZRANB1 |
| 0.03499 | 3.3731069 | -2.03413 | 1.0008034 | CDK20 |
| 0.030226 | 3.4909559 | -1.79936 | 1.0462298 | CRIPAK |
| 0.010383 | 4.3674429 | -0.04964 | 1.7853358 | DPAGT1 |
| 0.011202 | 4.3006705 | -0.18197 | 1.6719508 | SHKBP1 |
| 0.033565 | -3.408227 | -1.96426 | -1.3517377 | JPH4 |
| 0.015484 | 4.0368751 | -0.70733 | 1.8062611 | FAM108C1 |
| 0.038239 | 3.3052539 | -2.16887 | 1.0750582 | C1orf198 |
| 0.011017 | 4.3178463 | -0.1479 | 1.147167 | ERGIC2 |
| 0.008296 | 4.5617733 | 0.33358 | 1.4632384 | EVI5L |
| 0.02532 | 3.6250812 | -1.53135 | 1.1446954 | C2CD2L |
| 0.029094 | 3.5223306 | -1.73673 | 1.4462848 | RCBTB2 |
| 0.024483 | 3.6531633 | -1.47517 | 1.4635652 | TMEM159 |
| 0.029444 | 3.5141068 | -1.75315 | 1.3004365 | SPATA13 |
| 0.002868 | 5.657669 | 2.41833 | 2.3118465 | SAP30BP |
| 0.007126 | 4.7147211 | 0.63286 | 1.1422657 | APPL1 |
| 0.008409 | 4.5503933 | 0.31123 | 1.7306733 | CD86 |
| 0.004298 | 5.1792562 | 1.52648 | 1.7868512 | SSH3 |
| 0.016364 | 3.9860503 | -0.8089 | 1.1798071 | ZER1 |
| 0.003834 | 5.3143761 | 1.7815 | 2.090461 | GOLPH3L |
| 0.005726 | 4.9127476 | 1.01682 | 1.3336692 | PPAPDC2 |
| 0.001364 | 6.7255425 | 4.28862 | 1.6817337 | C5orf51 |
| 0.032496 | 3.4347883 | -1.91136 | 1.4156045 | F5 |
| 0.012502 | 4.2081638 | -0.36579 | 1.8037278 | ZHX2 |
| 0.004197 | 5.2035058 | 1.57242 | 1.64577 | CLN5 |
| 0.010893 | 4.3300443 | -0.12372 | 1.5911124 | CLEC9A |
| 0.023864 | 3.6753552 | -1.43076 | 1.3244256 | GAB2 |
| 0.006725 | 4.7707252 | 0.74187 | 1.4880764 | TCFL5 |
| 0.013814 | 4.1267095 | -0.52803 | 1.1854427 | HOOK2 |
| 0.001222 | 7.3546931 | 5.30863 | 2.4095633 | GIMAP4 |
| 0.004319 | 5.1761303 | 1.52056 | 1.8342856 | RTN4R |
| 0.002446 | 5.8579039 | 2.78208 | 1.7500211 | NLRX1 |
| 0.004474 | 5.1437202 | 1.45903 | 1.4226942 | PRPF6 |
| 0.002192 | 6.0288305 | 3.08791 | 2.0916555 | RAB40C |
| 0.029925 | 3.5015715 | -1.77818 | 1.111648 | SPINT2 |
| 0.006731 | 4.7679872 | 0.73655 | 1.6385566 | NDUFA8 |
| 0.002352 | 5.9387513 | 2.92728 | 1.7760595 | TTC9C |
| 0.027988 | 3.551247 | -1.67897 | 1.0977511 | PRDX5 |
| 0.047583 | 3.1381788 | -2.49882 | 1.023433 | OSGIN1 |
| 0.002868 | 5.6583794 | 2.41963 | 1.7098645 | SNAPIN |
| 0.006687 | 4.7749429 | 0.75007 | 1.3380764 | RAB32 |
| 0.018964 | 3.8681841 | -1.04471 | 1.3132494 | GUCA2B |
| 0.033325 | 3.4145382 | -1.95169 | 1.549763 | CERK |
| 0.008866 | 4.501503 | 0.21506 | 1.337717 | MIB1 |
| 0.007729 | 4.6321745 | 0.47161 | 1.3168754 | ZBTB4 |
| 0.006732 | 4.766874 | 0.73439 | 1.7351073 | STK4 |
| 0.009194 | 4.4628464 | 0.13888 | 1.0274274 | HERC3 |
| 0.04204 | 3.2249489 | -2.32782 | 1.0946633 | TMEM158 |
| 0.041265 | 3.2409642 | -2.29617 | 1.0582888 | LIMK1 |
| 0.034118 | 3.3931729 | -1.99422 | 1.3540944 | SLC12A8 |
| 0.007012 | 4.7277059 | 0.65816 | 1.5076334 | EFNA3 |
| 0.016364 | 3.9858582 | -0.80928 | 1.2085626 | ZNF77 |
| 0.015866 | 4.009128 | -0.76277 | 1.4676031 | SP110 |
| 0.019152 | 3.8579143 | -1.06526 | 1.1187452 | CLDN15 |
| 0.004098 | 5.2332549 | 1.62868 | 1.8720042 | CRIPT |
| 0.01607 | 3.9997611 | -0.78149 | 1.7066253 | TRIOBP |
| 0.008869 | 4.5008206 | 0.21371 | 1.8810312 | P2RX1 |
| 0.042277 | -3.2213078 | -2.33501 | -1.005039 | KRT32 |
| 0.022485 | 3.7300788 | -1.32121 | 1.4242945 | MSC |
| 0.030346 | 3.4875517 | -1.80615 | 1.1953054 | CWC15 |
| 0.035898 | 3.3531007 | -2.0739 | 1.0993128 | ACN9 |
| 0.036472 | 3.3401521 | -2.09962 | 1.2050717 | APH1B |
| 0.013197 | 4.1632161 | -0.45527 | 1.1829134 | PARN |
| 0.003327 | 5.4944462 | 2.11757 | 2.1497644 | PTP4A3 |
| 0.002352 | 5.934145 | 2.91903 | 1.8248638 | ZKSCAN4 |
| 0.004018 | 5.248622 | 1.65769 | 1.6960431 | LYL1 |
| 0.007773 | 4.6275937 | 0.46265 | 1.8849651 | TCIRG1 |
| 0.003177 | 5.5331999 | 2.18932 | 2.2560473 | MKKS |
| 0.003493 | 5.4229036 | 1.98458 | 1.5342572 | POLM |
| 0.041016 | 3.2474431 | -2.28336 | 1.3210641 | GINS3 |
| 0.018412 | 3.8942505 | -0.99253 | 1.3924155 | SCFD2 |
| 0.006492 | 4.8044158 | 0.80729 | 1.3243707 | ZFP3 |
| 0.010903 | -4.3281191 | -0.12754 | -1.1825892 | DSCAM |
| 0.006158 | 4.8546938 | 0.9047 | 1.8759109 | TIGD3 |
| 0.002023 | 6.1400034 | 3.28448 | 2.1713413 | GMIP |
| 0.002247 | 5.9834167 | 3.00708 | 2.0772909 | RBM4B |
| 0.014639 | 4.0797537 | -0.62171 | 1.4333759 | SLC22A18 |
| 0.018814 | 3.8755093 | -1.03004 | 2.3563356 | CAMP |
| 0.003593 | 5.3800124 | 1.90451 | 1.5778251 | TBL2 |
| 0.009958 | 4.4019951 | 0.01872 | 1.2092829 | FXR2 |
| 0.008503 | 4.5415314 | 0.29381 | 1.5806367 | PIGM |
| 0.03348 | 3.4099926 | -1.96074 | 1.3840335 | MAT2B |
| 0.007235 | 4.7009674 | 0.60604 | 1.3575839 | PHKA2 |
| 0.003383 | 5.4783645 | 2.08774 | 1.4081769 | ZCCHC17 |
| 0.011657 | 4.2676406 | -0.24754 | 1.0319527 | GPATCH1 |
| 0.012422 | 4.2131547 | -0.35586 | 1.4172634 | MRPS28 |
| 0.011454 | 4.2825642 | -0.21791 | 1.1317269 | WDR20 |
| 0.002913 | 5.6402739 | 2.38646 | 1.4415505 | GGPS1 |
| 0.0016 | 6.3735197 | 3.69125 | 2.1827793 | MRPL51 |
| 0.003528 | 5.4001826 | 1.94219 | 2.2900314 | LAT2 |
| 0.019925 | 3.8230582 | -1.13505 | 1.9346667 | OLIG1 |
| 0.015606 | 4.0263665 | -0.72832 | 1.5619472 | LSP1 |
| 0.004871 | 5.0676203 | 1.31404 | 1.3179918 | MOSPD1 |
| 0.016146 | 3.9950265 | -0.79095 | 1.0543136 | LRRC6 |
| 0.005653 | 4.9301036 | 1.05027 | 1.2088638 | KEAP1 |
| 0.011136 | 4.3074361 | -0.16855 | 1.5364967 | ZNRD1 |
| 0.012646 | 4.1991002 | -0.38382 | 1.6472938 | CDK14 |
| 0.034475 | -3.3842434 | -2.01198 | -1.1844204 | RBFOX1 |
| 0.039868 | -3.2703744 | -2.23798 | -1.2261841 | CASQ2 |
| 0.01365 | 4.136838 | -0.50784 | 1.0929816 | BNIPL |
| 0.008706 | 4.5156272 | 0.24286 | 1.30373 | ZNF282 |
| 0.041104 | 3.2452217 | -2.28775 | 1.235667 | GPC4 |
| 0.023503 | 3.6892694 | -1.40291 | 1.0715133 | C16orf91 |
| 0.023252 | 3.7012612 | -1.3789 | 1.1589927 | PACS1 |
| 0.013605 | 4.1394218 | -0.50269 | 1.4364614 | ROCK2 |
| 0.003148 | 5.5469337 | 2.2147 | 1.5910891 | FAIM3 |
| 0.025953 | 3.6076243 | -1.56627 | 1.3660481 | TIGD2 |
| 0.001222 | 7.1647467 | 5.0071 | 2.7936981 | OSBPL11 |
| 0.001879 | 6.2145832 | 3.4153 | 2.1607262 | HCG27 |
| 0.016034 | -4.0015459 | -0.77792 | -1.047492 | PVRL4 |
| 0.001438 | 6.5452132 | 3.985 | 1.8382754 | MICU1 |
| 0.00534 | 4.9785339 | 1.14342 | 1.5745157 | ZC3H10 |
| 0.002443 | 5.8664062 | 2.79739 | 1.5873412 | SPRYD3 |
| 0.014493 | 4.0887752 | -0.6037 | 1.6687348 | BATF3 |
| 0.013145 | 4.1675122 | -0.44672 | 1.3411894 | PPME1 |
| 0.022041 | 3.7456042 | -1.29013 | 1.836307 | PROS1 |
| 0.002357 | 5.8932195 | 2.84562 | 2.4275457 | PAK1 |
| 0.01639 | 3.9825287 | -0.81594 | 1.6935734 | ZSWIM8 |
| 0.001702 | 6.3053843 | 3.57343 | 1.8060668 | YIPF4 |
| 0.006456 | 4.8088856 | 0.81596 | 1.6704042 | SNX27 |
| 0.047525 | 3.1396538 | -2.49592 | 1.0445616 | CYBA |
| 0.026212 | 3.5988894 | -1.58374 | 1.2991788 | GLA |
| 0.021629 | 3.7586634 | -1.26398 | 1.6072931 | LY96 |
| 0.021362 | 3.771076 | -1.23913 | 1.0251216 | HMG20A |
| 0.042467 | 3.2176412 | -2.34225 | 1.2350333 | FDXR |
| 0.035065 | 3.3705094 | -2.0393 | 1.3600276 | EVI2A |
| 0.009005 | 4.4819466 | 0.17653 | 1.1647191 | SMIM8 |
| 0.008137 | 4.5808943 | 0.37111 | 1.4601057 | TMEM186 |
| 0.042685 | 3.2137842 | -2.34987 | 1.0443267 | AP1M1 |
| 0.030137 | -3.4946594 | -1.79197 | -1.0513019 | NLGN1 |
| 0.023974 | 3.6702666 | -1.44094 | 1.1382282 | DUOX2 |
| 0.007968 | 4.5998187 | 0.40823 | 1.4569219 | TIGD5 |
| 0.003854 | 5.3059908 | 1.76574 | 1.8303949 | TBC1D14 |
| 0.008157 | 4.5773733 | 0.36421 | 1.172508 | HINT3 |
| 0.022515 | 3.7289023 | -1.32357 | 2.0653483 | CDA |
| 0.00767 | 4.6413931 | 0.48965 | 1.4396229 | RASSF7 |
| 0.015514 | 4.0350537 | -0.71097 | 1.7032156 | SELP |
| 0.014206 | 4.1048371 | -0.57166 | 1.4595454 | TAL1 |
| 0.030897 | 3.4728508 | -1.83548 | 1.4390038 | CD101 |
| 0.022681 | 3.7228803 | -1.33562 | 1.4060285 | CKAP4 |
| 0.010879 | 4.3313161 | -0.1212 | 1.4178848 | GDI1 |
| 0.018614 | 3.8842607 | -1.01253 | 1.4004872 | IP6K1 |
| 0.0128 | 4.1892304 | -0.40347 | 1.4262153 | DCTN1 |
| 0.013699 | 4.1343185 | -0.51286 | 1.4522236 | PTPRN2 |
| 0.031052 | 3.4694491 | -1.84226 | 1.0112412 | VAMP5 |
| 0.001797 | 6.2680772 | 3.50861 | 2.5513747 | HLX |
| 0.0352 | 3.3666578 | -2.04695 | 1.0179334 | NOC3L |
| 0.008089 | 4.5881082 | 0.38527 | 1.5578018 | HIVEP2 |
| 0.02311 | 3.7080499 | -1.36531 | 1.4651557 | PLOD1 |
| 0.033464 | 3.4105036 | -1.95972 | 1.098909 | PFKM |
| 0.037183 | 3.3265507 | -2.12662 | 1.5286577 | PPP2R5B |
| 0.020612 | 3.7955134 | -1.1902 | 1.387592 | SEC14L1 |
| 0.005114 | 5.0216136 | 1.22604 | 1.5285274 | IRF3 |
| 0.022041 | 3.7457579 | -1.28982 | 1.3567666 | VCL |
| 0.00803 | 4.593596 | 0.39603 | 2.3482976 | SLA |
| 0.001438 | 6.5768299 | 4.0386 | 2.2903401 | RALBP1 |
| 0.018601 | 3.8851402 | -1.01077 | 1.7129816 | BTG2 |
| 0.012783 | 4.1903439 | -0.40125 | 1.1275184 | ANXA11 |
| 0.002244 | 5.9884063 | 3.01597 | 1.6834802 | PNP |
| 0.033452 | 3.411069 | -1.9586 | 1.7761205 | TYK2 |
| 0.004692 | 5.0995566 | 1.37497 | 1.4600899 | IL4R |
| 0.006997 | 4.7292132 | 0.6611 | 1.5448428 | ACP2 |
| 0.011277 | 4.2952839 | -0.19266 | 1.4281486 | IL2RB |
| 0.016824 | 3.9638743 | -0.85324 | 1.8665232 | DHCR24 |
| 0.001364 | 6.728036 | 4.29279 | 2.6980712 | CD14 |
| 0.001918 | 6.19856 | 3.38726 | 2.8146284 | NFE2 |
| 0.008805 | 4.5070387 | 0.22596 | 1.3825086 | MPI |
| 0.001222 | 7.0440725 | 4.81266 | 1.9273017 | COPB2 |
| 0.016141 | 3.9954565 | -0.79009 | 1.115005 | GTF3C2 |
| 0.01491 | 4.0650988 | -0.65096 | 1.314943 | C20orf111 |
| 0.020454 | 3.8014734 | -1.17826 | 1.1588357 | PCK2 |
| 0.013678 | 4.135297 | -0.51091 | 1.2757624 | MLLT11 |
| 0.011816 | 4.2546705 | -0.27331 | 1.181956 | SMAD4 |
| 0.032853 | 3.4255024 | -1.92986 | 1.2826605 | LMAN2 |
| 0.048206 | 3.1279506 | -2.51891 | 1.1092505 | ZYX |
| 0.038274 | 3.3040522 | -2.17125 | 1.0343732 | GALE |
| 0.003424 | 5.4447578 | 2.02528 | 1.3588893 | DAG1 |
| 0.018625 | 3.8833541 | -1.01434 | 1.3838724 | BLVRB |
| 0.008922 | 4.4945027 | 0.20127 | 1.7927211 | IGF2R |
| 0.001622 | 6.3447849 | 3.64165 | 1.9448567 | TBL1X |
| 0.026874 | 3.5800013 | -1.6215 | 1.864711 | SNN |
| 0.018976 | 3.8676283 | -1.04582 | 1.1603109 | HYAL2 |
| 0.007678 | 4.6403907 | 0.48769 | 1.7711502 | MAML1 |
| 0.005058 | 5.0302327 | 1.24255 | 1.4979857 | PAFAH1B1 |
| 0.042682 | 3.2140692 | -2.34931 | 1.5947008 | PLEK |
| 0.020437 | 3.802256 | -1.1767 | 1.129974 | PRPSAP1 |
| 0.009957 | 4.4025754 | 0.01986 | 1.1152878 | USP4 |
| 0.040258 | 3.2625392 | -2.25349 | 1.0941115 | PXK |
| 0.002948 | 5.6102151 | 2.33128 | 1.8570308 | RAB5B |
| 0.010251 | 4.3788052 | -0.02715 | 1.471678 | MTSS1 |
| 0.0265 | 3.590159 | -1.6012 | 1.2881425 | DNAJB2 |
| 0.013441 | 4.1494245 | -0.48275 | 1.302053 | CSK |
| 0.010279 | 4.376815 | -0.03109 | 1.4728836 | ACD |
| 0.001338 | 6.9067798 | 4.58871 | 2.093907 | PECAM1 |
| 0.006146 | 4.8567162 | 0.90861 | 1.3856292 | PRUNE |
| 0.007296 | 4.6919838 | 0.58851 | 1.2039712 | UROD |
| 0.002352 | 5.9319149 | 2.91504 | 3.0231574 | MBOAT7 |
| 0.002352 | 5.915418 | 2.88547 | 1.4917524 | ITPKB |
| 0.004692 | 5.0995935 | 1.37504 | 3.796985 | CX3CR1 |
| 0.001222 | 7.2194751 | 5.09454 | 2.4787101 | RGS2 |
| 0.010257 | 4.3781805 | -0.02839 | 1.0039621 | CUL3 |
| 0.0456 | -3.1690834 | -2.43801 | -1.1913842 | RABGGTB |
| 0.036551 | 3.3386181 | -2.10266 | 1.4534541 | MLF2 |
| 0.009856 | 4.4090368 | 0.03264 | 2.0385515 | QPCT |
| 0.012411 | 4.2141257 | -0.35392 | 1.9826464 | MAPK14 |
| 0.0014 | 6.6093818 | 4.09362 | 2.6803243 | PCMT1 |
| 0.018976 | 3.8674526 | -1.04617 | 1.1998575 | LHFPL2 |
| 0.013858 | 4.1244519 | -0.53254 | 1.2957104 | TM9SF4 |
| 0.019859 | 3.8263828 | -1.12839 | 1.2786485 | TFDP1 |
| 0.015905 | 4.0070364 | -0.76695 | 1.1601521 | RPA2 |
| 0.013439 | 4.1497705 | -0.48206 | 1.6949565 | HSPA1L |
| 0.021699 | 3.7556517 | -1.27001 | 1.3332051 | F13A1 |
| 0.022609 | 3.7259903 | -1.3294 | 1.3451524 | UCP2 |
| 0.016587 | 3.9729142 | -0.83516 | 1.3656785 | CLCN7 |
| 0.034685 | 3.3792829 | -2.02185 | 1.3379332 | LYN |
| 0.006419 | 4.814547 | 0.82694 | 1.8016385 | RASSF2 |
| 0.008219 | 4.5724923 | 0.35463 | 1.6096199 | HNRNPAB |
| 0.005009 | 5.0388119 | 1.25897 | 2.1957134 | IL1R1 |
| 0.002525 | 5.7961907 | 2.67059 | 2.1506426 | MYD88 |
| 0.003854 | 5.3071972 | 1.76801 | 2.6497376 | STX3 |
| 0.028257 | 3.5440707 | -1.69331 | 1.2538829 | GART |
| 0.009957 | 4.4026483 | 0.02001 | 1.6393012 | RGS3 |
| 0.034118 | 3.3930017 | -1.99456 | 1.1875163 | FAS |
| 0.049836 | 3.1047175 | -2.56452 | 1.9808027 | CXCL16 |
| 0.019652 | 3.8349654 | -1.11121 | 1.5877286 | TTLL12 |
| 0.001509 | 6.4456326 | 3.81518 | 2.7586837 | CYP27A1 |
| 0.004748 | 5.0887188 | 1.35431 | 2.0916764 | SELL |
| 0.005407 | 4.9662499 | 1.11982 | 1.6478264 | PPP1R11 |
| 0.002352 | 5.9110045 | 2.87755 | 1.8186654 | DAD1 |
| 0.022485 | 3.7302263 | -1.32092 | 1.1334219 | GNL1 |
| 0.007203 | 4.7071813 | 0.61816 | 1.5181473 | CCND3 |
| 0.020405 | 3.8039601 | -1.17328 | 1.4573155 | GNG11 |
| 0.023848 | 3.6761898 | -1.42909 | 1.2001151 | CASC3 |
| 0.040259 | 3.2622872 | -2.25399 | 1.2283865 | STX4 |
| 0.006503 | 4.8018353 | 0.80229 | 2.0179024 | CKS2 |
| 0.001222 | 7.1903699 | 5.04809 | 3.2034463 | IRF2 |
| 0.007357 | 4.6865644 | 0.57793 | 2.0359643 | PMEPA1 |
| 0.016179 | 3.9924583 | -0.79609 | 1.8225958 | AMPD3 |
| 0.017517 | 3.9333986 | -0.9142 | 1.3850902 | APPBP2 |
| 0.001438 | 6.5416606 | 3.97897 | 3.6924557 | SLC19A1 |
| 0.030685 | 3.479751 | -1.82172 | 1.1374479 | NT5DC2 |
| 0.011657 | -4.2677416 | -0.24734 | -1.5330916 | MLF1 |
| 0.001347 | 6.776722 | 4.37388 | 1.3493199 | DCAF10 |
| 0.007888 | 4.6127625 | 0.4336 | 1.4832476 | FADD |
| 0.001805 | 6.2631144 | 3.49997 | 2.8844152 | ATP6V1C1 |
| 0.011136 | 4.3066677 | -0.17007 | 2.2113007 | ADAM8 |
| 0.018819 | 3.8746981 | -1.03167 | 1.4902204 | ITGB3 |
| 0.000978 | 8.2517901 | 6.65934 | 3.1175267 | CD180 |
| 0.045217 | 3.1742353 | -2.42786 | 1.3127354 | ARHGAP22 |
| 0.008622 | 4.522758 | 0.25689 | 1.6228779 | TLR9 |
| 0.020263 | 3.8093374 | -1.16252 | 1.2057156 | ATP11C |
| 0.00492 | 5.0579438 | 1.29555 | 1.4485961 | CENPQ |
| 0.006404 | 4.81786 | 0.83337 | 1.3564237 | DBN1 |
| 0.038292 | 3.3034629 | -2.17242 | 1.0953596 | CD2 |
| 0.023489 | 3.6913327 | -1.39878 | 2.6888744 | CA4 |
| 0.012685 | 4.1958856 | -0.39022 | 1.3220366 | CETP |
| 0.002244 | 5.9894075 | 3.01776 | 3.292453 | HCK |
| 0.001376 | 6.6727499 | 4.20026 | 1.7165642 | CD79B |
| 0.003839 | 5.3123449 | 1.77768 | 1.6713531 | PML |
| 0.041001 | 3.2479205 | -2.28242 | 1.1162948 | TAF10 |
| 0.00489 | 5.0633507 | 1.30588 | 1.5477362 | UBTF |
| 0.009404 | 4.448276 | 0.11013 | 1.3478159 | TRADD |
| 0.002948 | 5.615611 | 2.3412 | 1.5134789 | CSE1L |
| 0.029912 | 3.5023768 | -1.77657 | 1.0620015 | HTATIP2 |
| 0.013861 | 4.1238889 | -0.53366 | 1.4733145 | ABCC3 |
| 0.013842 | 4.125453 | -0.53054 | 1.9465631 | SLC16A5 |
| 0.008048 | 4.5913862 | 0.3917 | 1.1299852 | LIN7C |
| 0.026171 | 3.601211 | -1.5791 | 1.0115317 | EGFL7 |
| 0.01189 | 4.2498895 | -0.28281 | 1.3904458 | TMEM115 |
| 0.015372 | 4.0434439 | -0.69421 | 1.3315736 | PPP2CA |
| 0.025292 | 3.6259403 | -1.52964 | 1.0498437 | ILKAP |
| 0.010284 | 4.3762378 | -0.03223 | 1.1266657 | ARL6IP5 |
| 0.015088 | 4.0571947 | -0.66675 | 1.0863199 | CLCC1 |
| 0.005653 | 4.9299922 | 1.05005 | 1.5105504 | PAFAH1B2 |
| 0.006813 | 4.75384 | 0.70904 | 1.5688512 | TMCO1 |
| 0.023437 | 3.6948312 | -1.39178 | 1.071069 | MTMR12 |
| 0.0118 | 4.2565544 | -0.26957 | 1.4957159 | SDCCAG3 |
| 0.035118 | 3.3685719 | -2.04315 | 1.3855251 | TGIF2 |
| 0.009005 | 4.4833405 | 0.17928 | 1.1729004 | TBKBP1 |
| 0.012062 | 4.2385617 | -0.30533 | 1.4133121 | STARD8 |
| 0.040265 | 3.2619686 | -2.25462 | 1.1483309 | GRAMD4 |
| 0.019542 | 3.8419631 | -1.0972 | 1.5483525 | OXSR1 |
| 0.002855 | 5.6707517 | 2.44228 | 2.097027 | RBM47 |
| 0.049345 | 3.1115513 | -2.55111 | 1.0178927 | WDR67 |
| 0.012704 | 4.1939003 | -0.39417 | 1.6601552 | SECTM1 |
| 0.008272 | 4.5646154 | 0.33916 | 2.6762546 | GIMAP8 |
| 0.007904 | 4.6073019 | 0.4229 | 1.3322022 | RAB11FIP1 |
| 0.004691 | 5.1010125 | 1.37775 | 1.4019987 | TSNAX |
| 0.01954 | 3.8422529 | -1.09662 | 1.1723002 | FCHO1 |
| 0.001222 | 7.1676409 | 5.01173 | 3.0220173 | CD93 |
| 0.017319 | -3.9427494 | -0.89549 | -1.0661733 | RNF17 |
| 0.004005 | 5.2542601 | 1.66833 | 2.0569087 | MOB3C |
| 0.010759 | 4.3401175 | -0.10376 | 1.2081274 | SLX4 |
| 0.005619 | -4.934866 | 1.05944 | -1.0446045 | C11orf70 |
| 0.014803 | 4.0709756 | -0.63923 | 1.117226 | AKAP3 |
| 0.014335 | 4.0972009 | -0.58689 | 1.3591898 | CCDC88B |
| 0.04804 | 3.1308092 | -2.5133 | 1.198123 | AGPAT9 |
| 0.009603 | 4.428598 | 0.07128 | 1.4318375 | ZBTB32 |
| 0.023504 | 3.6889635 | -1.40352 | 1.2165778 | RASGRP2 |
| 0.004658 | 5.1066968 | 1.38858 | 1.6683757 | TRIM66 |
| 0.033998 | 3.3974583 | -1.98569 | 2.2539188 | ELANE |
| 0.01392 | 4.1209733 | -0.53947 | 1.5820214 | MS4A3 |
| 0.019725 | 3.83145 | -1.11824 | 1.4742575 | RFX2 |
| 0.004143 | 5.2210278 | 1.60557 | 3.0662307 | ALOX5AP |
| 0.030855 | 3.4750839 | -1.83103 | 1.4847001 | DHRS12 |
| 0.021699 | 3.7565496 | -1.26821 | 1.3016318 | MR1 |
| 0.00755 | 4.6603107 | 0.52665 | 2.1324386 | DCAF12 |
| 0.031784 | 3.4521583 | -1.87674 | 1.7318968 | TKTL1 |
| 0.033893 | 3.4005758 | -1.97949 | 1.4079623 | GTF2H4 |
| 0.008577 | 4.5293822 | 0.26992 | 1.4776685 | ALG10 |
| 0.040465 | -3.2579021 | -2.26267 | -1.7433675 | CHRNA6 |
| 0.026414 | -3.5939606 | -1.59359 | -1.2160948 | LHX6 |
| 0.018197 | 3.9040699 | -0.97288 | 1.1445754 | RAB3IP |
| 0.038261 | 3.3047341 | -2.1699 | 1.0235779 | SCAF1 |
| 0.007961 | 4.6010742 | 0.41069 | 1.884094 | TACC3 |
| 0.008706 | 4.5149274 | 0.24148 | 1.5226586 | NPFF |
| 0.004043 | 5.2445876 | 1.65008 | 3.6131391 | AQP9 |
| 0.001553 | 6.4122983 | 3.758 | 1.9357377 | KIAA1324 |
| 0.0118 | 4.2566618 | -0.26935 | 1.1977248 | SLC44A2 |
| 0.026874 | 3.5798631 | -1.62178 | 1.080845 | LINS |
| 0.030974 | 3.4709347 | -1.8393 | 1.4186842 | INTS3 |
| 0.016101 | 3.997041 | -0.78693 | 1.157366 | JRKL |
| 0.001864 | 6.2211224 | 3.42673 | 3.4788108 | PPP1R10 |
| 0.039137 | 3.2852742 | -2.20847 | 1.170294 | BOD1L1 |
| 0.026212 | 3.5995021 | -1.58251 | 1.5790586 | TXNDC15 |
| 0.014005 | 4.116421 | -0.54855 | 1.7874022 | ATP6V0D1 |
| 0.015821 | 4.0116217 | -0.75778 | 1.4135352 | ANAPC13 |
| 0.041208 | 3.242105 | -2.29392 | 1.0057891 | WDR33 |
| 0.006963 | 4.7343739 | 0.67115 | 1.2407893 | POGZ |
| 0.010019 | 4.3938027 | 0.00252 | 2.2176902 | TRMT1L |
| 0.023171 | 3.7053836 | -1.37065 | 1.8804201 | CCDC3 |
| 0.008559 | 4.5311801 | 0.27346 | 1.3426257 | CAMTA2 |
| 0.001222 | 7.0849822 | 4.87882 | 2.1822815 | NAB1 |
| 0.040115 | 3.266071 | -2.2465 | 1.5961263 | B4GALT5 |
| 0.007295 | 4.6930474 | 0.59059 | 1.0954108 | KLF2 |
| 0.005218 | 4.9942184 | 1.17352 | 2.3115149 | ABTB1 |
| 0.049459 | 3.1097846 | -2.55458 | 1.0724628 | TSPAN9 |
| 0.007224 | 4.7026501 | 0.60932 | 1.8683466 | LRRC4 |
| 0.007666 | 4.6442281 | 0.4952 | 1.4162417 | MRPL12 |
| 0.002948 | 5.6200517 | 2.34935 | 1.9962089 | NDUFB6 |
| 0.015286 | 4.0482594 | -0.68459 | 2.1362762 | HN1 |
| 0.007569 | 4.6566443 | 0.51948 | 2.1473978 | GLG1 |
| 0.004444 | 5.1540733 | 1.4787 | 1.966029 | PPP1R9B |
| 0.013074 | 4.1733318 | -0.43513 | 2.3634818 | CBFA2T3 |
| 0.018552 | 3.886894 | -1.00726 | 1.4002705 | RRAGC |
| 0.04887 | 3.1179239 | -2.5386 | 1.6447529 | PLEKHG2 |
| 0.026874 | 3.579833 | -1.62184 | 1.2677371 | MINK1 |
| 0.028889 | 3.5281697 | -1.72507 | 1.3266126 | ZNF467 |
| 0.004739 | 5.091317 | 1.35926 | 4.5635165 | PI3 |
| 0.0273 | 3.5702906 | -1.64091 | 1.3815305 | S100A9 |
| 0.010428 | -4.3643064 | -0.05585 | -1.7229202 | RCL1 |
| 0.023942 | 3.6715984 | -1.43828 | 1.0600193 | SNAPC4 |
| 0.013716 | 4.1327347 | -0.51602 | 1.5353062 | TIAM1 |
| 0.002525 | 5.7952106 | 2.66882 | 1.9947553 | ZNF213 |
| 0.008141 | 4.5802881 | 0.36993 | 1.3644585 | HTRA2 |
| 0.010428 | 4.3640875 | -0.05628 | 1.8256197 | VAV1 |
| 0.006555 | 4.795959 | 0.79088 | 1.5978925 | CD72 |
| 0.044233 | 3.1884117 | -2.39993 | 1.2950108 | AKR1B10 |
| 0.013179 | 4.1646071 | -0.4525 | 2.3297928 | SIGLEC5 |
| 0.034202 | 3.3906753 | -1.99919 | 1.0483755 | SLC46A3 |
| 0.037274 | 3.3247341 | -2.13022 | 1.1614116 | TREML1 |
| 0.032805 | 3.4266359 | -1.9276 | 1.3699419 | TNRC6B |
| 0.001996 | 6.1561782 | 3.31292 | 1.6501298 | CTSA |
| 0.004143 | 5.2200124 | 1.60365 | 2.9131262 | NABP1 |
| 0.001347 | 6.8012213 | 4.41455 | 1.749382 | PRR3 |
| 0.0224 | 3.7336903 | -1.31398 | 1.5313181 | SDF2 |
| 0.01555 | 4.0311409 | -0.71878 | 1.9986419 | NEU1 |
| 0.007078 | 4.7192548 | 0.6417 | 1.5434894 | GSDMD |
| 0.031895 | 3.4486724 | -1.88369 | 1.0752711 | ARF3 |
| 0.039396 | 3.278659 | -2.22158 | 1.434665 | TMEM63A |
| 0.003088 | 5.5688835 | 2.2552 | 2.0100987 | KCTD7 |
| 0.002948 | 5.6149181 | 2.33992 | 4.6337565 | TNFRSF10C |
| 0.001222 | 7.1315111 | 4.95377 | 3.1030826 | TMEM154 |
| 0.001382 | 6.6589231 | 4.17704 | 1.9858734 | ETNK1 |
| 0.006975 | 4.7311921 | 0.66495 | 2.0033415 | TLR10 |
| 0.0183 | 3.8999108 | -0.9812 | 1.114498 | C17orf85 |
| 0.02311 | 3.7085213 | -1.36437 | 1.0150654 | ZNHIT2 |
| 0.010288 | 4.3755719 | -0.03355 | 1.2453989 | MTL5 |
| 0.001503 | 6.4567715 | 3.83425 | 2.5381739 | LINC00324 |
| 0.002352 | 5.9439877 | 2.93665 | 2.1025121 | ZNF653 |
| 0.002915 | 5.6367835 | 2.38006 | 1.4455887 | METTL4 |
| 0.019648 | 3.8363804 | -1.10837 | 1.7829605 | PILRA |
| 0.005118 | 5.0180074 | 1.21913 | 3.4519194 | MGAM |
| 0.012703 | 4.1941853 | -0.3936 | 1.2199545 | GIMAP7 |
| 0.044935 | 3.1783011 | -2.41985 | 1.1906608 | PPP2R3B |
| 0.015709 | 4.0210311 | -0.73898 | 1.0744961 | SCAF4 |
| 0.003834 | 5.3210474 | 1.79403 | 2.0035828 | FRAT1 |
| 0.011725 | 4.2629311 | -0.2569 | 3.3850948 | IL1B |
| 0.043764 | 3.1973393 | -2.38232 | 1.2223689 | FBRSL1 |
| 0.003067 | 5.5766772 | 2.26956 | 1.6857098 | ZNRF2 |
| 0.040934 | 3.2492513 | -2.27978 | 1.2321546 | NLRC3 |
| 0.00567 | 4.925891 | 1.04215 | 1.7339269 | LINC00116 |
| 0.039971 | 3.2687728 | -2.24115 | 1.0308927 | AIM1L |
| 0.002665 | 5.7366416 | 2.56249 | 1.9898713 | DUSP18 |
| 0.010903 | 4.3284339 | -0.12691 | 1.3379713 | TRMT6 |
| 0.012436 | 4.2121115 | -0.35793 | 1.5502128 | C1orf74 |
| 0.010005 | 4.3951902 | 0.00526 | 1.4527978 | ZNF319 |
| 0.006296 | 4.8339099 | 0.86447 | 2.7461609 | TNFSF14 |
| 0.005747 | 4.9081637 | 1.00798 | 2.0158775 | IL17RA |
| 0.025171 | 3.629694 | -1.52213 | 1.3028331 | PSTPIP1 |
| 0.003424 | 5.4446978 | 2.02517 | 1.6361369 | SPOP |
| 0.007773 | 4.6273261 | 0.46212 | 2.218914 | RASGRP4 |
| 0.007728 | 4.6334295 | 0.47407 | 1.7168918 | ADCK4 |
| 0.013414 | 4.1516154 | -0.47839 | 1.6998266 | ABI3 |
| 0.023565 | 3.6862357 | -1.40898 | 1.0382887 | DAGLB |
| 0.010928 | 4.3244386 | -0.13483 | 2.0206193 | LINC00694 |
| 0.009574 | 4.4317652 | 0.07754 | 1.5586723 | GPR65 |
| 0.009538 | 4.4349788 | 0.08388 | 1.2417477 | ZDHHC12 |
| 0.022604 | 3.7263818 | -1.32861 | 1.0220645 | BRWD3 |
| 0.035952 | 3.3514346 | -2.07721 | 1.3080391 | SRXN1 |
| 0.001388 | 6.6440331 | 4.15201 | 3.626882 | IGSF6 |
| 0.040265 | 3.2614334 | -2.25568 | 1.0120383 | TMEM86B |
| 0.025674 | 3.6153742 | -1.55077 | 1.0804003 | RASAL3 |
| 0.030217 | 3.4920645 | -1.79715 | 1.2709861 | ZMYM1 |
| 0.008342 | 4.555273 | 0.32081 | 1.8084289 | EMR2 |
| 0.003493 | 5.4263666 | 1.99103 | 3.9545687 | PGLYRP1 |
| 0.021279 | 3.7739315 | -1.23341 | 1.2644167 | ARHGAP1 |
| 0.036424 | 3.340909 | -2.09811 | 1.0214583 | RFC2 |
| 0.001222 | 7.2581479 | 5.15606 | 3.5854603 | FRAT2 |
| 0.035926 | 3.3525292 | -2.07503 | 1.0735884 | MTMR4 |
| 0.023472 | 3.6925603 | -1.39632 | 1.267765 | USP28 |
| 0.006944 | 4.7379535 | 0.67812 | 1.8317975 | NCKAP5L |
| 0.004658 | 5.1065804 | 1.38836 | 1.2647755 | CCDC126 |
| 0.003528 | 5.4009383 | 1.9436 | 1.5366908 | GEMIN6 |
| 0.041119 | 3.2448116 | -2.28856 | 1.1643099 | MRGBP |
| 0.025207 | 3.6286779 | -1.52416 | 1.2431043 | TDRKH |
| 0.001821 | 6.2549276 | 3.48571 | 1.9466363 | GTF2E1 |
| 0.006361 | 4.8247846 | 0.84679 | 2.3489886 | ASPG |
| 0.002621 | 5.7570049 | 2.59951 | 1.807469 | NIT1 |
| 0.012929 | 4.1819046 | -0.41805 | 1.2109558 | H2AFX |
| 0.019073 | 3.8610739 | -1.05894 | 1.2666638 | EPS15L1 |
| 0.019882 | 3.8246718 | -1.13182 | 1.6115267 | CTDSPL |
| 0.047435 | 3.140902 | -2.49346 | 1.0169331 | PTPN9 |
| 0.007666 | 4.6450178 | 0.49674 | 1.5909857 | MAK |
| 0.003955 | 5.2787532 | 1.7145 | 2.3025491 | RGL4 |
| 0.002716 | 5.7186912 | 2.5298 | 2.0150504 | CYB561D2 |
| 0.001222 | 7.1841815 | 5.0382 | 2.1523936 | METTL6 |
| 0.004268 | 5.1870923 | 1.54134 | 2.0805334 | RPS6KA1 |
| 0.040156 | 3.2646118 | -2.24939 | 1.1148415 | FOXS1 |
| 0.014377 | 4.0943562 | -0.59257 | 1.120419 | LAMP1 |
| 0.030894 | 3.4740436 | -1.8331 | 1.0368052 | CDK9 |
| 0.003113 | 5.5601468 | 2.23909 | 1.2550265 | FAM216A |
| 0.012942 | 4.1809016 | -0.42005 | 1.429713 | HELZ2 |
| 0.001438 | 6.5626651 | 4.0146 | 4.4635524 | MMP9 |
| 0.019251 | 3.8533218 | -1.07446 | 1.0495514 | KIAA0100 |
| 0.025981 | 3.6067845 | -1.56795 | 1.1646959 | MAP3K5 |
| 0.013464 | 4.1475903 | -0.48641 | 1.2685195 | PSME3 |
| 0.010688 | 4.3439612 | -0.09614 | 1.4268421 | GAK |
| 0.04047 | 3.2576612 | -2.26315 | 1.076642 | LY75 |
| 0.035023 | 3.3721679 | -2.036 | 1.1354512 | ALG3 |
| 0.001601 | 6.3626053 | 3.67243 | 3.8249678 | MNDA |
| 0.016878 | 3.9614823 | -0.85802 | 1.2157333 | TXNDC9 |
| 0.01463 | 4.0803106 | -0.6206 | 1.3242244 | CALCOCO2 |
| 0.001459 | 6.4978684 | 3.90445 | 1.6215805 | TRAK2 |
| 0.012622 | 4.2002544 | -0.38153 | 1.5139097 | SS18L1 |
| 0.026212 | 3.5988771 | -1.58376 | 1.8798547 | MYO7B |
| 0.001222 | 7.1652694 | 5.00793 | 3.7040687 | CYP1B1 |
| 0.009256 | 4.4584243 | 0.13016 | 1.27143 | MTHFD2 |
| 0.032413 | 3.4373891 | -1.90618 | 1.4309734 | TPD52L2 |
| 0.003483 | 5.4306864 | 1.99908 | 1.878371 | TFCP2 |
| 0.023469 | 3.6930474 | -1.39535 | 1.5751711 | BCL6 |
| 0.007444 | 4.6760677 | 0.55744 | 2.1032639 | EHD1 |
| 0.008244 | 4.568026 | 0.34586 | 1.1024885 | MUT |
| 0.011252 | 4.2968129 | -0.18963 | 1.7231048 | PRKCD |
| 0.02404 | 3.6674281 | -1.44662 | 1.1547036 | BIK |
| 0.004631 | 5.1161618 | 1.4066 | 1.41866 | HAGH |
| 0.021567 | 3.7622361 | -1.25683 | 1.4190131 | UBXN2B |
| 0.015514 | 4.0355677 | -0.70994 | 1.249843 | VGLL4 |
| 0.005098 | 5.0238542 | 1.23033 | 3.6754468 | C3AR1 |
| 0.007707 | 4.635669 | 0.47845 | 2.191268 | SIRPA |
| 0.044117 | 3.1905609 | -2.39569 | 1.2326972 | C5orf42 |
| 0.023171 | 3.7053742 | -1.37067 | 1.3551869 | PGBD4 |
| 0.005274 | 4.9870825 | 1.15983 | 1.1596973 | COQ7 |
| 0.005948 | 4.8830183 | 0.95945 | 2.151327 | CHRNA10 |
| 0.015892 | 4.0076567 | -0.76571 | 1.2100618 | PWWP2B |
| 0.014606 | 4.0813338 | -0.61855 | 1.3864874 | CD244 |
| 0.019025 | 3.8631855 | -1.05471 | 1.4290343 | RENBP |
| 0.045156 | 3.1753725 | -2.42562 | 1.0047549 | GALR2 |
| 0.007445 | 4.6754545 | 0.55624 | 1.1259124 | EIF5B |
| 0.001369 | 6.6804286 | 4.21314 | 2.7630575 | S1PR4 |
| 0.017279 | 3.9447277 | -0.89153 | 1.5188472 | GPR171 |
| 0.042027 | 3.2257972 | -2.32614 | 1.818626 | GCNT1 |
| 0.03882 | 3.290775 | -2.19757 | 1.5701134 | GPBAR1 |
| 0.023171 | 3.7053925 | -1.37063 | 1.0099801 | PGS1 |
| 0.019837 | 3.8271194 | -1.12691 | 1.5784527 | NTNG2 |
| 0.02336 | 3.6977297 | -1.38597 | 1.3624869 | VPS9D1 |
| 0.002695 | 5.728267 | 2.54724 | 2.8427166 | TREML2 |
| 0.027525 | 3.5638618 | -1.65376 | 1.3903166 | LIG4 |
| 0.033202 | 3.4172376 | -1.94632 | 1.3874232 | IRF7 |
| 0.022609 | 3.7249631 | -1.33145 | 1.3550535 | PRICKLE3 |
| 0.012247 | 4.2263561 | -0.3296 | 1.3232945 | FOXD2 |
| 0.01262 | 4.2006149 | -0.38081 | 1.1274602 | FAM114A2 |
| 0.027538 | 3.5621972 | -1.65709 | 2.03845 | STK3 |
| 0.023333 | 3.6987087 | -1.38401 | 1.2345189 | RFX5 |
| 0.023869 | 3.6749166 | -1.43164 | 1.6111773 | GPR108 |
| 0.047425 | 3.1411106 | -2.49305 | 1.0665993 | OXER1 |
| 0.008942 | 4.4920011 | 0.19634 | 1.2263289 | EIF2B4 |
| 0.0334 | 3.4125425 | -1.95566 | 1.8830394 | MAFB |
| 0.005379 | 4.9714483 | 1.12981 | 1.5127004 | ZFYVE21 |
| 0.039322 | 3.2804419 | -2.21805 | 1.1986019 | DIABLO |
| 0.019126 | 3.8590502 | -1.06299 | 1.0552618 | DEDD |
| 0.023252 | 3.701749 | -1.37793 | 1.0595658 | THBS3 |
| 0.006099 | 4.8646707 | 0.92399 | 1.3364993 | BTN2A1 |
| 0.00448 | 5.1420623 | 1.45588 | 1.9791741 | RGL2 |
| 0.002192 | 6.0336436 | 3.09646 | 2.4992037 | SLC9A1 |
| 0.008559 | 4.5311225 | 0.27334 | 1.4417108 | DIRC1 |
| 0.01639 | 3.9821955 | -0.8166 | 1.7892971 | DUSP1 |
| 0.021505 | 3.7647293 | -1.25184 | 1.1656523 | PYGO2 |
| 0.035118 | 3.3686984 | -2.0429 | 1.2282854 | SIPA1L1 |
| 0.038654 | 3.2946891 | -2.18982 | 1.0089509 | PTBP1 |
| 0.042527 | 3.2165352 | -2.34444 | 1.6742689 | SLC12A7 |
| 0.001601 | 6.3634063 | 3.67381 | 1.8313054 | NFATC3 |
| 0.009826 | 4.4110976 | 0.03671 | 1.2844319 | WDTC1 |
| 0.009538 | 4.4381484 | 0.09014 | 1.2195185 | MTA2 |
| 0.003493 | 5.4150048 | 1.96985 | 1.640151 | SLC35A4 |
| 0.022809 | 3.7183974 | -1.3446 | 1.0051739 | PLEKHO1 |
| 0.018614 | 3.8843364 | -1.01237 | 1.1313245 | SEC23B |
| 0.048218 | -3.1274874 | -2.51982 | -1.0694271 | SERPINF1 |
| 0.006918 | 4.7402661 | 0.68262 | 1.2845697 | C4orf3 |
| 0.003177 | 5.5323031 | 2.18766 | 2.1243017 | MAST3 |
| 0.00517 | 5.0042943 | 1.19285 | 1.3027432 | PPP2R1A |
| 0.00803 | 4.5932661 | 0.39538 | 2.5370534 | SLC24A4 |
| 0.007264 | 4.6972815 | 0.59885 | 1.0099363 | AKR1C4 |
| 0.008457 | 4.5462981 | 0.30318 | 1.4164397 | ZSCAN5A |
| 0.003145 | 5.550457 | 2.2212 | 1.7099828 | MEPCE |
| 0.008504 | -4.5394246 | 0.28967 | -1.2827138 | LIPI |
| 0.006374 | 4.8222685 | 0.84191 | 1.5734545 | MAPK13 |
| 0.004942 | 5.0523793 | 1.28492 | 2.563079 | C19orf59 |
| 0.008004 | 4.5960672 | 0.40088 | 1.9302265 | DHRS9 |
| 0.017367 | 3.9403275 | -0.90034 | 1.8749819 | FLOT1 |
| 0.002448 | 5.8444641 | 2.75784 | 1.5862453 | CSTF3 |
| 0.009957 | 4.4023429 | 0.0194 | 1.2747075 | PSMB8 |
| 0.012162 | 4.2325743 | -0.31723 | 1.5725001 | FERMT3 |
| 0.007904 | 4.6075173 | 0.42332 | 1.6661581 | MCMBP |
| 0.026707 | 3.5846966 | -1.61212 | 1.23885 | DMXL1 |
| 0.048206 | 3.1279883 | -2.51884 | 1.4416253 | TNFSF4 |
| 0.001397 | 6.6181402 | 4.10839 | 1.7238408 | DNAJB6 |
| 0.021404 | 3.7694048 | -1.24247 | 1.0751426 | COPZ1 |
| 0.002192 | 6.028533 | 3.08738 | 1.5993024 | MLEC |
| 0.046073 | 3.1619671 | -2.45202 | 1.2076719 | KNSTRN |
| 0.04458 | 3.1831337 | -2.41033 | 1.4606524 | BRSK1 |
| 0.010316 | 4.3734918 | -0.03766 | 1.5674295 | ARL3 |
| 0.010005 | 4.3953358 | 0.00555 | 2.0016272 | SQSTM1 |
| 0.031799 | 3.4516419 | -1.87777 | 1.0405142 | NHP2L1 |
| 0.042603 | 3.2151712 | -2.34713 | 1.6595521 | ATP2A1 |
| 0.014131 | 4.110185 | -0.56099 | 1.351033 | CHMP1A |
| 0.023961 | 3.6708736 | -1.43973 | 1.4367807 | ICMT |
| 0.004098 | 5.2332884 | 1.62874 | 1.942891 | DBNL |
| 0.015787 | 4.0142586 | -0.75252 | 1.7416549 | PRR5L |
| 0.0028 | 5.693682 | 2.48418 | 3.3265785 | VNN3 |
| 0.009005 | 4.481537 | 0.17573 | 1.1169859 | ADD1 |
| 0.016364 | 3.9845374 | -0.81192 | 1.29495 | TRIM24 |
| 0.019859 | 3.8256693 | -1.12982 | 1.2307752 | PPP1CA |
| 0.049962 | 3.1032634 | -2.56737 | 1.1199682 | OTUD5 |
| 0.025415 | 3.6226444 | -1.53623 | 1.1024064 | JMJD4 |
| 0.035065 | 3.3703751 | -2.03956 | 1.0208713 | LDLRAP1 |
| 0.022609 | 3.7251071 | -1.33117 | 1.0807544 | CLTCL1 |
| 0.00397 | 5.2716244 | 1.70107 | 1.686672 | IPCEF1 |
| 0.002448 | 5.8433301 | 2.7558 | 2.196078 | TPCN2 |
| 0.002868 | 5.6525295 | 2.40892 | 1.4582291 | USP25 |
| 0.008608 | 4.5251436 | 0.26158 | 1.9867062 | RABGEF1 |
| 0.007337 | 4.6887934 | 0.58228 | 2.9137296 | BTNL8 |
| 0.002525 | 5.7969164 | 2.67191 | 1.32039 | HIGD1A |
| 0.005704 | 4.9198174 | 1.03045 | 2.2725775 | ZNF2 |
| 0.006146 | 4.8561902 | 0.90759 | 1.3172457 | PPP1R14C |
| 0.012394 | -4.2151 | -0.35199 | -1.0178045 | SLC14A2 |
| 0.00149 | 6.4677778 | 3.85308 | 3.2075401 | FAM212B |
| 0.029065 | 3.5239082 | -1.73358 | 1.6644415 | LOC100506585 |
| 0.031227 | 3.465181 | -1.85078 | 1.5980271 | BRCA1 |
| 0.007418 | 4.6790016 | 0.56317 | 1.1056407 | PALLD |
| 0.013048 | 4.1753491 | -0.43111 | 1.1227354 | BAZ1B |
| 0.019311 | 3.8502494 | -1.08061 | 1.2004008 | AP4M1 |
| 0.004078 | 5.2395169 | 1.64051 | 3.6938098 | CXCR1 |
| 0.018743 | 3.8791661 | -1.02272 | 1.6045179 | MRM1 |
| 0.029504 | 3.5128501 | -1.75566 | 1.0818635 | SLC38A5 |
| 0.006523 | 4.7993404 | 0.79744 | 1.1342824 | FL |
| 0.028303 | 3.5422696 | -1.69691 | 1.011239 | SF3B3 |
| 0.013453 | 4.1484843 | -0.48463 | 1.3643908 | ECH1 |
| 0.001447 | 6.5151974 | 3.93397 | 4.0893203 | PTGS2 |
| 0.019069 | 3.8614977 | -1.05809 | 1.178934 | HMHA1 |
| 0.025767 | 3.6126714 | -1.55618 | 1.0511832 | NDUFA10 |
| 0.003493 | 5.4232053 | 1.98514 | 1.9823112 | PFKFB4 |
| 0.003955 | 5.2806741 | 1.71811 | 1.483562 | WRB |
| 0.001821 | 6.2532698 | 3.48282 | 2.948254 | CARD6 |
| 0.006334 | 4.8283453 | 0.85369 | 1.8648703 | LCMT2 |
| 0.020127 | 3.8141639 | -1.15285 | 1.0392406 | ZNF786 |
| 0.006969 | 4.7333171 | 0.66909 | 1.135317 | TCF20 |
| 0.016921 | 3.9587279 | -0.86353 | 1.152069 | KIAA1009 |
| 0.015409 | 4.0411037 | -0.69888 | 1.3324382 | CD2BP2 |
| 0.008893 | 4.4978866 | 0.20794 | 1.1866085 | AHSA1 |
| 0.011725 | 4.2623113 | -0.25813 | 1.083552 | ZBTB22 |
| 0.005891 | -4.8921065 | 0.977 | -1.0933946 | NYAP2 |
| 0.033046 | 3.4200855 | -1.94064 | 1.0077174 | PSMC4 |
| 0.011591 | 4.2729953 | -0.23691 | 1.870304 | ANKRD22 |
| 0.017781 | 3.92262 | -0.93576 | 1.2986122 | RUNDC1 |
| 0.003108 | 5.5631725 | 2.24467 | 1.1873322 | RALGPS2 |
| 0.007561 | 4.6579714 | 0.52208 | 1.1535128 | ZNF837 |
| 0.014899 | 4.0660777 | -0.64901 | 1.4082282 | RAB31 |
| 0.0248 | -3.6422042 | -1.4971 | -1.6002143 | PARD6G |
| 0.014771 | 4.0727233 | -0.63574 | 1.1142432 | NIPBL |
| 0.012286 | -4.2229365 | -0.3364 | -1.226875 | B3GALT5 |
| 0.005054 | 5.0312526 | 1.2445 | 1.2451809 | H1F0 |
| 0.010992 | 4.3198484 | -0.14393 | 1.1813188 | PPP1R17 |
| 0.019203 | 3.8553166 | -1.07046 | 1.2559514 | FKBP2 |
| 0.028214 | 3.5454118 | -1.69063 | 2.1307283 | BCL2A1 |
| 0.014322 | 4.0979395 | -0.58542 | 1.2970602 | TCF25 |
| 0.016587 | 3.9731601 | -0.83467 | 1.2065817 | E2F2 |
| 0.006296 | 4.8348063 | 0.8662 | 1.5132085 | WBP2 |
| 0.019009 | 3.8658172 | -1.04944 | 1.0753691 | MYL12A |
| 0.03577 | 3.3559535 | -2.06823 | 1.7706899 | SPINT1 |
| 0.011627 | 4.2700166 | -0.24282 | 1.917958 | HEY1 |
| 0.014463 | 4.0906251 | -0.60001 | 2.0988808 | TSPAN2 |
| 0.049091 | 3.1148003 | -2.54474 | 1.0278348 | FICD |
| 0.001447 | 6.5167729 | 3.93666 | 2.7119702 | RAB10 |
| 0.007744 | 4.6305644 | 0.46846 | 2.9460505 | CLEC4E |
| 0.0016 | 6.3738668 | 3.69185 | 2.0004822 | KIAA1551 |
| 0.013287 | 4.1583925 | -0.46488 | 1.1725016 | SLC35A5 |
| 0.017828 | 3.9196045 | -0.9418 | 1.5433411 | ZSCAN26 |
| 0.038367 | 3.3003814 | -2.17853 | 1.8413962 | SLC15A3 |
| 0.006913 | 4.7426562 | 0.68728 | 1.8790129 | PDCD11 |
| 0.042913 | 3.2101761 | -2.35699 | 1.06518 | COG5 |
| 0.009538 | 4.4355981 | 0.08511 | 1.1602642 | KCNK6 |
| 0.013486 | 4.1457698 | -0.49004 | 2.0527955 | LTBP1 |
| 0.044502 | 3.184432 | -2.40777 | 1.0571493 | PEF1 |
| 0.002352 | 5.9184268 | 2.89086 | 1.5279881 | GOLGA5 |
| 0.019666 | -3.8336109 | -1.11392 | -1.0753924 | RHOJ |
| 0.037405 | 3.3220263 | -2.1356 | 1.3493329 | SLC2A6 |
| 0.023451 | 3.6940299 | -1.39338 | 1.0549677 | TIMP3 |
| 0.001962 | 6.1839257 | 3.36162 | 2.8108738 | SIGLEC9 |
| 0.00323 | 5.5165302 | 2.15849 | 1.7566845 | C6orf47 |
| 0.026415 | 3.5937465 | -1.59402 | 1.2375076 | DDAH2 |
| 0.001222 | 7.2340228 | 5.11771 | 1.8699134 | GPANK1 |
| 0.016941 | 3.9577183 | -0.86555 | 1.0948878 | HIST1H2BK |
| 0.036269 | 3.3443784 | -2.09122 | 2.7927212 | OSM |
| 0.032389 | 3.4382264 | -1.90451 | 1.0863717 | MPST |
| 0.0248 | 3.6415563 | -1.49839 | 1.3053062 | THEG |
| 0.01807 | 3.9105964 | -0.95982 | 1.0815972 | DHX33 |
| 0.013716 | 4.1326864 | -0.51612 | 1.0564353 | SMARCD2 |
| 0.032744 | 3.4279432 | -1.92499 | 1.09268 | LINC00626 |
| 0.008886 | 4.4992642 | 0.21065 | 3.4100559 | SLPI |
| 0.004444 | 5.1535968 | 1.47779 | 1.5333574 | TOR1B |
| 0.009538 | 4.4381025 | 0.09005 | 1.9245236 | LILRA6 |
| 0.006731 | 4.7691994 | 0.73891 | 1.3863038 | PIK3R6 |
| 0.015686 | 4.0221937 | -0.73666 | 2.0539045 | NARF |
| 0.003401 | 5.466678 | 2.06604 | 1.3297173 | FTSJ3 |
| 0.013629 | 4.1380559 | -0.50541 | 1.5152539 | MYBPC3 |
| 0.007455 | 4.6734814 | 0.55239 | 1.5422116 | DNAJC11 |
| 0.005903 | 4.8904949 | 0.97389 | 2.877499 | CRISPLD2 |
| 0.005674 | 4.9244264 | 1.03933 | 1.3184236 | NDE1 |
| 0.024984 | 3.6361904 | -1.50913 | 2.2387443 | FCRLA |
| 0.011136 | 4.3080916 | -0.16725 | 1.2905562 | MSANTD4 |
| 0.041517 | 3.2362556 | -2.30548 | 1.0688093 | RNF146 |
| 0.016416 | 3.9803352 | -0.82032 | 1.4990382 | TMA16 |
| 0.006598 | 4.7896125 | 0.77856 | 2.0716288 | ATP6V0A1 |
| 0.015065 | 4.0584367 | -0.66427 | 1.4189261 | RIPK3 |
| 0.008089 | 4.5881241 | 0.3853 | 1.5895232 | EMILIN2 |
| 0.047438 | 3.1406482 | -2.49396 | 1.0460095 | TNFSF13B |
| 0.037239 | 3.3253028 | -2.1291 | 1.7108827 | YPEL3 |
| 0.028251 | -3.544399 | -1.69265 | -1.0486375 | TAS2R13 |
| 0.00513 | 5.012207 | 1.20802 | 2.040866 | TLR8 |
| 0.001512 | 6.4416377 | 3.80834 | 2.3765455 | ATP6V1D |
| 0.01941 | 3.8464481 | -1.08822 | 1.5825616 | RUVBL1 |
| 0.003546 | 5.3926948 | 1.92821 | 1.6295018 | EPB49 |
| 0.028418 | 3.5399763 | -1.70149 | 1.3901918 | LRWD1 |
| 0.001397 | 6.6209012 | 4.11305 | 1.8055525 | PYCR2 |
| 0.006822 | 4.751366 | 0.70423 | 2.2255926 | HSPA1B |
| 0.022659 | 3.7235243 | -1.33433 | 1.1742207 | NANS |
| 0.002868 | 5.6525604 | 2.40898 | 1.4676045 | CYB5R3 |
| 0.018946 | 3.8693547 | -1.04236 | 1.264988 | PHOX2A |
| 0.032496 | 3.4348356 | -1.91126 | 1.0271152 | CCDC107 |
| 0.024768 | 3.6429833 | -1.49554 | 1.086054 | DGKZ |
| 0.003493 | 5.4148672 | 1.96959 | 2.2083257 | IRAK3 |
| 0.003493 | 5.4195966 | 1.97841 | 2.8111211 | LIMK2 |
| 0.046588 | 3.1542499 | -2.46721 | 1.3027119 | LEFTY1 |
| 0.028919 | 3.5272136 | -1.72698 | 1.337172 | GPSM2 |
| 0.015372 | 4.0429523 | -0.69519 | 1.0663261 | MEA1 |
| 0.020998 | 3.7821123 | -1.21703 | 1.4884248 | TSHZ3 |
| 0.006777 | 4.7613543 | 0.72365 | 1.6679349 | GNPDA1 |
| 0.019311 | 3.8510341 | -1.07904 | 1.0331543 | SNX17 |
| 0.004644 | 5.1121037 | 1.39888 | 1.7232468 | CD59 |
| 0.002665 | 5.7396 | 2.56787 | 2.4458492 | ATG7 |
| 0.040558 | -3.2559635 | -2.2665 | -1.0423574 | SIX4 |
| 0.001338 | 6.9165324 | 4.60471 | 4.2422474 | MSRB1 |
| 0.023503 | 3.6893504 | -1.40275 | 1.2457827 | TRPV2 |
| 0.001355 | 6.7439281 | 4.3193 | 2.2627754 | PREB |
| 0.018347 | 3.8977305 | -0.98557 | 1.0986714 | FTSJ2 |
| 0.018926 | 3.8704302 | -1.04021 | 1.0251589 | MED7 |
| 0.001447 | 6.5274894 | 3.95489 | 1.8505694 | CNOT1 |
| 0.04897 | -3.1166532 | -2.5411 | -1.1727277 | PSTK |
| 0.005585 | 4.9412098 | 1.07165 | 2.3448565 | DOCK5 |
| 0.001438 | 6.5793474 | 4.04286 | 3.4315979 | CEP19 |
| 0.009912 | 4.4055503 | 0.02575 | 1.2369767 | C10orf88 |
| 0.0412 | 3.2424269 | -2.29328 | 2.002362 | TREM1 |
| 0.038218 | 3.3056365 | -2.16811 | 1.378535 | GPR77 |
| 0.012411 | 4.2139092 | -0.35435 | 1.4199015 | PSENEN |
| 0.011392 | 4.2869651 | -0.20917 | 1.6452169 | ABAT |
| 0.002948 | 5.6164304 | 2.3427 | 2.7983382 | SLC25A37 |
| 0.017781 | 3.9213492 | -0.93831 | 1.3847662 | RMI1 |
| 0.007815 | 4.6226456 | 0.45296 | 1.7339591 | GPN3 |
| 0.015514 | 4.0349792 | -0.71112 | 1.4771488 | AGGF1 |
| 0.019996 | 3.8205858 | -1.14 | 1.1634727 | SFT2D1 |
| 0.012289 | 4.2223786 | -0.33751 | 1.2519999 | UQCR10 |
| 0.006219 | 4.8486053 | 0.89292 | 1.2878973 | SLC33A1 |
| 0.002244 | 6.0004986 | 3.03752 | 1.7608192 | PCTP |
| 0.010005 | 4.3968862 | 0.00862 | 1.8908646 | SLC35B3 |
| 0.000978 | 8.0089382 | 6.30545 | 2.0841469 | STT3A |
| 0.01428 | 4.1003512 | -0.58061 | 1.6382943 | CREB3 |
| 0.039346 | 3.2796354 | -2.21964 | 1.2314415 | C1orf162 |
| 0.046345 | 3.1579026 | -2.46002 | 1.0309792 | TRAPPC3 |
| 0.013453 | 4.148497 | -0.4846 | 1.3109434 | PTGES2 |
| 0.024275 | 3.659249 | -1.46299 | 1.6580812 | PQLC1 |
| 0.005619 | 4.9364646 | 1.06252 | 1.8047684 | GPSM3 |
| 0.024126 | 3.6642198 | -1.45304 | 1.1295824 | TTI2 |
| 0.004902 | 5.0615062 | 1.30236 | 1.3819039 | MUS81 |
| 0.007883 | 4.6138857 | 0.4358 | 1.4787144 | FUZ |
| 0.007901 | 4.6097674 | 0.42773 | 1.5724686 | TMEM8A |
| 0.008739 | 4.5120705 | 0.23586 | 1.5530642 | ORAI2 |
| 0.001347 | 6.7745238 | 4.37023 | 1.9768202 | CXorf21 |
| 0.025581 | 3.6185651 | -1.54439 | 1.0457527 | FOXL2 |
| 0.048744 | 3.1198549 | -2.53481 | 1.2143313 | C7orf60 |
| 0.008148 | 4.5794625 | 0.36831 | 1.2579484 | PAOX |
| 0.008503 | 4.5408335 | 0.29244 | 1.1843977 | NPEPPS |
| 0.017153 | 3.9506261 | -0.87974 | 1.0600003 | SLAMF6 |
| 0.001612 | 6.3535464 | 3.65679 | 1.7980382 | IGIP |
| 0.010383 | 4.3676854 | -0.04916 | 1.7953321 | TMEM71 |
| 0.031299 | 3.463217 | -1.85469 | 1.2785672 | C12orf4 |
| 0.023803 | 3.6776044 | -1.42626 | 2.447639 | SGK1 |
| 0.013994 | 4.1171607 | -0.54708 | 1.0879409 | HORMAD1 |
| 0.018455 | 3.8923166 | -0.9964 | 1.18737 | PTGDR2 |
| 0.002695 | 5.7264822 | 2.54399 | 1.6453273 | SEC23IP |
| 0.013471 | 4.1467966 | -0.48799 | 1.495668 | RAB1B |
| 0.047973 | 3.1321434 | -2.51068 | 1.3943985 | ZSWIM4 |
| 0.001222 | 7.105399 | 4.91175 | 2.9709315 | KDM4B |
| 0.007457 | 4.6723109 | 0.5501 | 1.9267301 | RAC2 |
| 0.015734 | 4.0183904 | -0.74426 | 1.0876651 | ZNF688 |
| 0.035939 | 3.3520101 | -2.07606 | 1.0705304 | PEX6 |
| 0.003399 | 5.4735671 | 2.07883 | 2.0284255 | KIAA0513 |
| 0.005189 | 4.9999548 | 1.18453 | 1.683654 | FAM214B |
| 0.005747 | 4.9072606 | 1.00624 | 1.2038247 | MED8 |
| 0.024062 | 3.666154 | -1.44917 | 1.0878331 | STK11 |
| 0.019725 | 3.8313322 | -1.11848 | 1.1398807 | ZNF146 |
| 0.006559 | 4.7942709 | 0.78761 | 2.2474292 | DPEP3 |
| 0.030137 | 3.4941466 | -1.79299 | 1.3746011 | GLIPR2 |
| 0.023487 | -3.6916116 | -1.39822 | -1.5724957 | ASXL3 |
| 0.043883 | -3.1949398 | -2.38705 | -1.2195629 | KRTAP3-3 |
| 0.020795 | 3.7888378 | -1.20356 | 1.523281 | PLEKHB2 |
| 0.001376 | 6.6654436 | 4.18799 | 3.0958785 | CD300LB |
| 0.028784 | 3.5317162 | -1.71799 | 1.0568367 | YEATS2 |
| 0.016896 | 3.9607376 | -0.85951 | 1.5787645 | SAMD14 |
| 0.018926 | 3.870341 | -1.04039 | 1.1667151 | B4GALT3 |
| 0.003532 | 5.3978089 | 1.93776 | 2.5334754 | SLC43A2 |
| 0.002448 | 5.8377389 | 2.74571 | 1.5724411 | MTFR1L |
| 0.019205 | 3.854833 | -1.07143 | 1.5992604 | FAM198B |
| 0.003493 | 5.4125482 | 1.96527 | 1.5987117 | CHTOP |
| 0.008688 | 4.5176077 | 0.24676 | 1.376296 | TBC1D17 |
| 0.015414 | 4.0407089 | -0.69967 | 1.1941313 | USO1 |
| 0.002224 | 6.0168652 | 3.06664 | 4.8356278 | EGR1 |
| 0.008342 | 4.5555228 | 0.3213 | 1.4894337 | AP1B1 |
| 0.003351 | 5.4869738 | 2.10372 | 1.4917797 | IGSF8 |
| 0.01194 | 4.2464123 | -0.28972 | 1.6929475 | AVIL |
| 0.014345 | 4.0957028 | -0.58988 | 1.1047202 | LSMD1 |
| 0.008976 | 4.4873308 | 0.18714 | 1.3773436 | CAPZB |
| 0.001338 | 6.8736591 | 4.53425 | 2.1357477 | ORAI3 |
| 0.001479 | 6.4841579 | 3.88106 | 1.8373054 | WIBG |
| 0.030226 | 3.4906097 | -1.80005 | 1.1314359 | MIEN1 |
| 0.001222 | 7.4338362 | 5.43264 | 4.0639918 | DGAT2 |
| 0.023503 | 3.6900506 | -1.40134 | 1.2702441 | ZNF234 |
| 0.009632 | 4.4254902 | 0.06515 | 1.3257208 | UBL7 |
| 0.009979 | 4.4002989 | 0.01536 | 1.3973257 | SLC7A6OS |
| 0.013724 | 4.1318786 | -0.51773 | 1.3384818 | LASP1 |
| 0.04047 | 3.257482 | -2.2635 | 1.235271 | FDX1L |
| 0.026727 | 3.5840295 | -1.61345 | 1.024105 | AMN1 |
| 0.026744 | 3.583413 | -1.61468 | 1.2766619 | ARHGEF2 |
| 0.024907 | 3.6386678 | -1.50417 | 1.0374261 | PRPF38B |
| 0.012831 | 4.186403 | -0.4091 | 1.1772466 | AP1G2 |
| 0.028729 | 3.5332526 | -1.71492 | 1.3440648 | CTSD |
| 0.013994 | 4.1173219 | -0.54675 | 1.1428997 | CNOT3 |
| 0.004121 | 5.2288809 | 1.62042 | 2.3386137 | EXOSC4 |
| 0.002665 | 5.736969 | 2.56308 | 1.7273426 | MTHFSD |
| 0.027827 | 3.5547824 | -1.67191 | 1.4404295 | EPSTI1 |
| 0.001366 | 6.7202743 | 4.27982 | 1.9575029 | RASSF3 |
| 0.011087 | 4.3114271 | -0.16063 | 1.2319999 | TRIM41 |
| 0.048707 | 3.1208446 | -2.53287 | 1.1938494 | TMEM79 |
| 0.009457 | 4.4441826 | 0.10205 | 1.949131 | OSCAR |
| 0.005407 | 4.9669724 | 1.1212 | 1.4102244 | CNTROB |
| 0.035874 | 3.3537477 | -2.07261 | 1.0065455 | DHRS1 |
| 0.003168 | 5.5359411 | 2.19439 | 1.9599063 | MBD6 |
| 0.008503 | 4.5402597 | 0.29131 | 1.5599008 | CLDND2 |
| 0.023552 | 3.6873086 | -1.40683 | 1.4968688 | PARP10 |
| 0.019871 | 3.8251313 | -1.1309 | 1.0908801 | SOCS4 |
| 0.003889 | 5.296023 | 1.747 | 1.2498036 | ZMAT2 |
| 0.018108 | 3.9078994 | -0.96522 | 1.7842854 | THAP8 |
| 0.040636 | 3.2544319 | -2.26954 | 1.0300518 | FAM185A |
| 0.017454 | 3.9362071 | -0.90858 | 1.1078711 | RAB37 |
| 0.011017 | 4.3180773 | -0.14745 | 1.326958 | ZNF276 |
| 0.002868 | 5.6567236 | 2.4166 | 2.2374226 | TST |
| 0.029209 | 3.5195886 | -1.74221 | 1.1359712 | C15orf40 |
| 0.024068 | 3.6658637 | -1.44975 | 1.8608766 | CDC42EP3 |
| 0.01305 | 4.1745074 | -0.43278 | 1.0936387 | LPCAT4 |
| 0.01559 | 4.0284001 | -0.72426 | 1.3118597 | ICAM3 |
| 0.020797 | 3.788593 | -1.20405 | 1.3717876 | SYNE3 |
| 0.007707 | -4.6364188 | 0.47992 | -1.388928 | OTUD7A |
| 0.034498 | 3.3837397 | -2.01298 | 1.0659747 | ALDH16A1 |
| 0.037765 | 3.314381 | -2.15077 | 1.0537946 | TMEM102 |
| 0.011816 | 4.254654 | -0.27334 | 1.3019681 | UBAC2 |
| 0.011359 | 4.2892428 | -0.20465 | 1.4967266 | FCHO2 |
| 0.007047 | 4.7227305 | 0.64847 | 1.3302262 | RNF187 |
| 0.003168 | 5.5361326 | 2.19474 | 1.8339716 | ZXDC |
| 0.030494 | 3.4838494 | -1.81354 | 1.0351556 | PPP1R8 |
| 0.038367 | 3.3004869 | -2.17832 | 1.1735084 | RARA |
| 0.008886 | 4.4990103 | 0.21015 | 1.3122266 | FRMD8 |
| 0.001397 | 6.6295242 | 4.12758 | 2.4308596 | TMCC1 |
| 0.014714 | 4.0765649 | -0.62807 | 1.2555376 | CEPT1 |
| 0.011657 | 4.2673571 | -0.24811 | 1.0926118 | FAM219B |
| 0.016364 | 3.9840943 | -0.81281 | 1.2821851 | PRMT5 |
| 0.039681 | 3.2733652 | -2.23206 | 2.2171563 | NLRP12 |
| 0.038857 | -3.2897018 | -2.1997 | -1.7795298 | GRID1-AS1 |
| 0.008002 | 4.5966469 | 0.40201 | 1.3092578 | LGALSL |
| 0.011842 | -4.252459 | -0.27771 | -1.3138997 | PIK3R3 |
| 0.012151 | -4.2333108 | -0.31577 | -1.5064049 | ANKS1B |
| 0.039314 | 3.2807585 | -2.21742 | 1.0580943 | PPM1M |
| 0.015948 | 4.0050515 | -0.77092 | 1.2448642 | MYPOP |
| 0.001222 | 7.2511333 | 5.14492 | 1.8282668 | PIK3AP1 |
| 0.020019 | 3.8188737 | -1.14342 | 1.3856922 | TMOD1 |
| 0.021563 | 3.7628723 | -1.25555 | 1.0327805 | ZNF57 |
| 0.001148 | 7.5832558 | 5.66417 | 2.069214 | TLN1 |
| 0.008608 | 4.5244135 | 0.26015 | 2.6274197 | CD24 |
| 0.007684 | 4.6383474 | 0.48369 | 1.6373486 | RGL3 |
| 0.027238 | 3.5720018 | -1.63749 | 1.0023781 | B3GNT9 |
| 0.043879 | 3.1951245 | -2.38669 | 1.0677524 | CPAMD8 |
| 0.006913 | -4.741109 | 0.68426 | -1.1490612 | C11orf44 |
| 0.007904 | 4.6085356 | 0.42532 | 1.1762845 | MAGED2 |
| 0.000978 | 8.1631782 | 6.5312 | 2.4589732 | TMEM185B |
| 0.007423 | 4.6782192 | 0.56164 | 1.695845 | LOC100996279 |
| 0.016364 | 3.9844144 | -0.81217 | 1.0798525 | CDK2AP2 |
| 0.030226 | 3.4910812 | -1.79911 | 1.2613053 | STXBP2 |
| 0.007526 | 4.6628831 | 0.53168 | 1.2167785 | UBE2A |
| 0.031421 | 3.4607762 | -1.85956 | 1.0614383 | MSS51 |
| 0.031609 | 3.4563569 | -1.86837 | 1.1133721 | PPP2R2D |
| 0.005183 | 5.001124 | 1.18677 | 1.5202407 | LOC728431 |
| 0.011252 | 4.2973752 | -0.18851 | 1.39173 | PLXNB3 |
| 0.014206 | 4.1046019 | -0.57213 | 1.2531577 | USF1 |
| 0.023565 | 3.6863733 | -1.40871 | 1.1251736 | CARS2 |
| 0.003487 | 5.4289044 | 1.99576 | 2.0851462 | PSMB9 |
| 0.008102 | 4.5858613 | 0.38086 | 1.5228421 | LCP1 |
| 0.041104 | 3.2458501 | -2.28651 | 1.2607091 | C6orf1 |
| 0.016588 | 3.9726659 | -0.83566 | 1.0709003 | EFEMP2 |
| 0.004873 | 5.065753 | 1.31047 | 1.6484914 | EAF2 |
| 0.047642 | 3.1369157 | -2.5013 | 1.3046798 | GBP2 |
| 0.002855 | 5.6730731 | 2.44652 | 2.5245246 | HSDL2 |
| 0.010992 | 4.3198527 | -0.14392 | 1.6269047 | R3HDM4 |
| 0.008949 | 4.4891437 | 0.19072 | 1.3390525 | NPTN |
| 0.041104 | -3.2457925 | -2.28662 | -1.6104698 | RIPK1 |
| 0.031879 | 3.4498826 | -1.88128 | 1.4580558 | CAT |
| 0.00567 | 4.9259171 | 1.0422 | 1.2977327 | SLC9A3R1 |
| 0.041846 | -3.2295165 | -2.3188 | -1.3846688 | LINC00163 |
| 0.016088 | 3.9981192 | -0.78477 | 1.2616841 | C20orf201 |
| 0.038659 | 3.2943901 | -2.19041 | 1.0103558 | PUSL1 |
| 0.011343 | 4.2908107 | -0.20154 | 1.1009382 | CSNK1G1 |
| 0.001558 | 6.3993194 | 3.73568 | 1.3568647 | NTRK1 |
| 0.021625 | 3.7591074 | -1.26309 | 1.054827 | ORAOV1 |
| 0.010844 | 4.3334862 | -0.1169 | 1.1532074 | ATP9A |
| 0.008562 | 4.5306254 | 0.27237 | 1.4373587 | TAGLN2 |
| 0.011154 | 4.3043257 | -0.17472 | 1.1294984 | SUN2 |
| 0.018509 | 3.8888396 | -1.00336 | 2.0907441 | PNPLA1 |
| 0.005343 | 4.9761689 | 1.13887 | 1.8832428 | LAIR1 |
| 0.033918 | 3.3999844 | -1.98066 | 1.4838397 | GALK1 |
| 0.007218 | 4.7051133 | 0.61413 | 1.5831142 | SCN1B |
| 0.008503 | 4.54031 | 0.29141 | 2.4895452 | MAP1LC3A |
| 0.009736 | 4.418362 | 0.05106 | 1.5644129 | RAD51C |
| 0.0047 | 5.0964763 | 1.3691 | 1.9751278 | SLC31A1 |
| 0.003854 | 5.3063866 | 1.76648 | 2.363616 | C11orf75 |
| 0.004871 | 5.0670783 | 1.313 | 2.3902999 | S100A11 |
| 0.018814 | 3.8762972 | -1.02847 | 1.3525843 | ENDOG |
| 0.01927 | 3.8524496 | -1.0762 | 1.4569919 | TPST1 |
| 0.028181 | 3.5464341 | -1.68859 | 1.438629 | STX5 |
| 0.007955 | 4.601845 | 0.4122 | 1.3373536 | TAF12 |
| 0.010601 | 4.3503945 | -0.0834 | 1.3598643 | PPA2 |
| 0.02614 | 3.6019372 | -1.57764 | 1.3757532 | RGS19 |
| 0.008601 | 4.5266388 | 0.26453 | 1.4594999 | OCEL1 |
| 0.023803 | 3.6776692 | -1.42613 | 1.1312358 | PSMB5 |
| 0.0081 | 4.5866257 | 0.38236 | 2.0434612 | CDC34 |
| 0.004139 | 5.2244676 | 1.61207 | 1.4274441 | OGFOD2 |
| 0.005564 | 4.9447908 | 1.07855 | 1.9438461 | TP53 |
| 0.028784 | 3.5312785 | -1.71886 | 2.496652 | G0S2 |
| 0.014771 | 4.0739098 | -0.63337 | 1.0975967 | RRAGA |
| 0.01529 | 4.0476931 | -0.68572 | 1.1818141 | POLR2H |
| 0.006146 | 4.8582784 | 0.91163 | 1.3956941 | FAM134C |
| 0.023914 | 3.6726634 | -1.43615 | 1.6634857 | FCER1G |
| 0.008949 | 4.4911041 | 0.19458 | 1.0920192 | HEG1 |
| 0.031784 | 3.4523485 | -1.87636 | 1.1641301 | ARPC1B |
| 0.002129 | 6.0661015 | 3.15402 | 1.8190477 | ACTR3 |
| 0.001148 | 7.6503473 | 5.76704 | 1.7855787 | C11orf68 |
| 0.004144 | 5.2185254 | 1.60084 | 2.2755468 | FSTL1 |
| 0.019564 | 3.8400381 | -1.10105 | 1.6646427 | BANF1 |
| 0.023419 | 3.6955022 | -1.39043 | 1.5132833 | TP53I11 |
| 0.024355 | 3.6571643 | -1.46716 | 1.1141808 | FSTL3 |
| 0.011248 | 4.298162 | -0.18695 | 1.4199558 | STX12 |
| 0.008688 | -4.5175804 | 0.24671 | -1.0210203 | LOC339442 |
| 0.02311 | 3.7083438 | -1.36473 | 1.5503495 | VCAN |
| 0.006389 | 4.820561 | 0.8386 | 1.5639037 | ATP13A1 |
| 0.008409 | 4.550246 | 0.31094 | 1.5479794 | GSK3A |
| 0.032334 | 3.4401224 | -1.90073 | 1.0827903 | SLC26A6 |
| 0.028183 | 3.5460958 | -1.68926 | 1.0548412 | NPRL2 |
| 0.010657 | 4.3463018 | -0.0915 | 1.203843 | VDAC3 |
| 0.015026 | 4.0604014 | -0.66034 | 1.5010592 | RETSAT |
| 0.003834 | 5.3174239 | 1.78722 | 1.8378065 | YIPF3 |
| 0.017726 | 3.9253566 | -0.93029 | 1.4657898 | SBNO2 |
| 0.026184 | 3.6005025 | -1.58051 | 1.2510822 | SLC22A4 |
| 0.003424 | 5.4484798 | 2.0322 | 2.1336786 | GPR132 |
| 0.026029 | 3.6052547 | -1.57101 | 2.2259329 | B3GNT8 |
| 0.032899 | 3.4234587 | -1.93393 | 1.2707051 | XAF1 |
| 0.030378 | 3.4864582 | -1.80834 | 1.8322634 | SUV420H1 |
| 0.003517 | 5.4052969 | 1.95174 | 3.0109637 | ANXA3 |
| 0.005407 | 4.9659066 | 1.11916 | 1.3157161 | ANK1 |
| 0.005619 | 4.9355165 | 1.06069 | 1.2622988 | RSBN1L |
| 0.049519 | 3.108765 | -2.55658 | 1.033842 | LOC100286925 |
| 0.015858 | 4.0095726 | -0.76188 | 1.0080813 | PFDN6 |
| 0.015115 | 4.0560903 | -0.66895 | 1.0572403 | GCNT2 |
| 0.003778 | 5.3335721 | 1.81753 | 2.8226716 | DYSF |
| 0.043276 | -3.204627 | -2.36794 | -1.0722482 | ADAD2 |
| 0.008206 | 4.5736428 | 0.35688 | 1.7169376 | ZCCHC6 |
| 0.008559 | 4.5315287 | 0.27414 | 2.3170491 | PROK2 |
| 0.027909 | 3.552927 | -1.67561 | 1.043747 | AGT |
| 0.015725 | 4.019125 | -0.74279 | 1.3350391 | PDCD6 |
| 0.016862 | 3.9625798 | -0.85583 | 1.5384912 | ZKSCAN1 |
| 0.007707 | 4.6352005 | 0.47754 | 1.6112417 | FAM89B |
| 0.014129 | 4.1112424 | -0.55888 | 1.4357376 | LRP10 |
| 0.021662 | 3.7575713 | -1.26617 | 1.7076753 | CCDC71L |
| 0.004474 | 5.1442355 | 1.46001 | 1.3336623 | SLC39A3 |
| 0.008272 | 4.5648288 | 0.33958 | 1.2523007 | MAP4 |
| 0.037701 | 3.3160764 | -2.1474 | 1.1424698 | ABCC5 |
| 0.01189 | 4.2497471 | -0.28309 | 1.2835694 | TMBIM6 |
| 0.004526 | 5.1350982 | 1.44264 | 1.5122163 | UNC13D |
| 0.001438 | 6.5653441 | 4.01914 | 2.3569493 | GAPT |
| 0.001584 | 6.3846579 | 3.71045 | 2.1054103 | OSTF1 |
| 0.001338 | 6.8798457 | 4.54443 | 2.3499277 | RTN2 |
| 0.018217 | 3.9031367 | -0.97475 | 1.8245872 | TMOD2 |
| 0.009123 | 4.4704605 | 0.15389 | 1.1308805 | TERF2 |
| 0.007866 | 4.6161597 | 0.44025 | 1.9092574 | NPL |
| 0.022825 | 3.7171841 | -1.34703 | 1.1225463 | SRSF1 |
| 0.0315 | 3.4591581 | -1.86279 | 1.223644 | CSNK2B |
| 0.015286 | 4.0491435 | -0.68282 | 1.5338871 | MKNK1 |
| 0.003493 | 5.4161511 | 1.97199 | 1.1646467 | YIPF6 |
| 0.032415 | 3.4370442 | -1.90686 | 1.1053565 | MASP1 |
| 0.004425 | 5.158278 | 1.48668 | 2.360864 | MBOAT2 |
| 0.001222 | 7.3450865 | 5.29351 | 2.2564181 | MGAT2 |
| 0.010828 | 4.3348206 | -0.11425 | 1.6443406 | DSC2 |
| 0.003336 | 5.4911622 | 2.11148 | 2.5040769 | SLC43A3 |
| 0.001388 | 6.6367337 | 4.13972 | 1.707891 | ZSCAN9 |
| 0.014567 | 4.0843434 | -0.61255 | 1.1920845 | GOLGA1 |
| 0.017319 | 3.9418856 | -0.89722 | 1.27428 | KDM5C |
| 0.0128 | 4.1891778 | -0.40357 | 1.7924548 | WDFY3 |
| 0.022217 | 3.7403436 | -1.30066 | 1.3954438 | ISG20 |
| 0.009863 | 4.4083067 | 0.03119 | 1.7435279 | TLR1 |
| 0.011311 | 4.2933058 | -0.19659 | 1.0188188 | KRBOX4 |
| 0.036909 | 3.3316752 | -2.11645 | 1.4212458 | PCSK6 |
| 0.011136 | 4.3065624 | -0.17028 | 1.538143 | KATNBL1 |
| 0.030226 | 3.4906231 | -1.80002 | 1.2828507 | TAOK2 |
| 0.002352 | 5.9256961 | 2.90389 | 1.6763541 | ZSCAN32 |
| 0.002482 | 5.8186879 | 2.7113 | 1.8508668 | LPAR6 |
| 0.000978 | 8.0714637 | 6.39738 | 2.6379158 | ARPC5 |
| 0.005124 | 5.0164561 | 1.21616 | 1.8488868 | COL9A3 |
| 0.004826 | 5.0750904 | 1.3283 | 1.6146949 | TMBIM4 |
| 0.002207 | 6.0230394 | 3.07762 | 2.1559327 | EDC3 |
| 0.01964 | 3.8367876 | -1.10756 | 1.6784266 | GPR155 |
| 0.035985 | 3.3499627 | -2.08013 | 1.0046929 | RALGAPA2 |
| 0.017242 | 3.9465002 | -0.88799 | 1.1920643 | MPLKIP |
| 0.016364 | 3.9850682 | -0.81086 | 1.1556683 | DDX23 |
| 0.041517 | 3.2362738 | -2.30544 | 1.0596907 | ANKRD17 |
| 0.018105 | 3.9090191 | -0.96298 | 1.4888868 | PARP9 |
| 0.032899 | 3.4237054 | -1.93344 | 1.1519229 | HSD17B12 |
| 0.039656 | 3.2740222 | -2.23076 | 1.2912537 | VPS45 |
| 0.042034 | 3.2252227 | -2.32728 | 1.1452545 | ZFPM1 |
| 0.03914 | 3.2849852 | -2.20905 | 1.2592027 | SMARCA5 |
| 0.001338 | 6.8909004 | 4.56262 | 2.2204546 | TBC1D10B |
| 0.009103 | -4.4723947 | 0.15771 | -1.2028066 | SLC9C2 |
| 0.014542 | 4.0866368 | -0.60797 | 1.1601165 | BCDIN3D |
| 0.015597 | 4.0277756 | -0.72551 | 1.5461019 | LIN7A |
| 0.019756 | 3.8299171 | -1.12131 | 1.1023392 | LRRC41 |
| 0.017976 | -3.9141659 | -0.95268 | -1.490746 | CAMKV |
| 0.006219 | 4.8476964 | 0.89116 | 1.4168348 | MKLN1 |
| 0.007901 | 4.6093652 | 0.42694 | 1.6900326 | EOMES |
| 0.019011 | 3.8647707 | -1.05154 | 1.6798003 | XPO6 |
| 0.021625 | 3.7591999 | -1.26291 | 1.4166074 | TM6SF1 |
| 0.018526 | 3.8881921 | -1.00466 | 1.3479888 | CTC1 |
| 0.013126 | 4.1706075 | -0.44055 | 1.606219 | GALNT7 |
| 0.003026 | 5.5892748 | 2.29277 | 1.3843041 | TRIP11 |
| 0.004083 | 5.2373812 | 1.63647 | 1.4796421 | SEC62 |
| 0.004388 | 5.1638654 | 1.49729 | 1.4224137 | PTPRO |
| 0.029874 | 3.503742 | -1.77384 | 1.0613352 | HOOK3 |
| 0.034175 | 3.3915998 | -1.99735 | 1.8561611 | C17orf62 |
| 0.028811 | 3.5300695 | -1.72128 | 2.620322 | THBS1 |
| 0.018393 | 3.8953195 | -0.99039 | 1.4172412 | USP37 |
| 0.004263 | 5.1912817 | 1.54927 | 3.1365324 | BEST1 |
| 0.0334 | 3.4127577 | -1.95524 | 1.1373544 | CRLS1 |
| 0.01823 | 3.9025857 | -0.97585 | 1.0806905 | CRNKL1 |
| 0.014525 | 4.0874678 | -0.60631 | 1.9221631 | LRRK2 |
| 0.031202 | 3.4657008 | -1.84974 | 1.1075115 | TEX10 |
| 0.039971 | 3.2690149 | -2.24067 | 1.3588886 | TMUB2 |
| 0.006637 | 4.7815456 | 0.7629 | 1.3660467 | NUB1 |
| 0.036503 | -3.3396187 | -2.10068 | -1.1243695 | MYL1 |
| 0.018502 | 3.889839 | -1.00136 | 1.1946707 | CLTC |
| 0.038924 | 3.2887082 | -2.20167 | 1.137619 | PPP3CB |
| 0.035985 | 3.3500459 | -2.07996 | 1.2153023 | CTNS |
| 0.042899 | 3.210448 | -2.35646 | 1.152142 | GPR114 |
| 0.003576 | 5.3850992 | 1.91402 | 1.467436 | RPS6KA3 |
| 0.002103 | 6.0926901 | 3.20105 | 2.3266964 | MOSPD2 |
| 0.00778 | 4.6264788 | 0.46046 | 1.1795925 | DCAKD |
| 0.003336 | 5.490322 | 2.10993 | 2.0679976 | ARAP1 |
| 0.046815 | 3.1508013 | -2.474 | 1.0847982 | LARP4B |
| 0.025708 | 3.6144069 | -1.55271 | 1.0305827 | TNFRSF9 |
| 0.031504 | -3.458584 | -1.86393 | -1.6949783 | WBSCR17 |
| 0.042351 | 3.2197332 | -2.33812 | 1.4231771 | PYCARD |
| 0.019073 | 3.8605938 | -1.0599 | 1.2405212 | EHF |
| 0.005244 | 4.9911499 | 1.16764 | 2.0751724 | CPPED1 |
| 0.019152 | 3.8575527 | -1.06599 | 1.2934444 | PAPOLA |
| 0.026401 | 3.5946468 | -1.59222 | 1.2254012 | WDR3 |
| 0.021936 | 3.7487885 | -1.28375 | 1.094814 | CEP104 |
| 0.003647 | 5.3610627 | 1.86905 | 1.6062473 | SNAP23 |
| 0.00487 | 5.0698755 | 1.31835 | 1.9914221 | GHRL |
| 0.008504 | 4.5394535 | 0.28972 | 1.2849824 | PANK2 |
| 0.041528 | 3.235319 | -2.30733 | 1.0880229 | SLC25A40 |
| 0.003148 | 5.5435105 | 2.20838 | 1.8393112 | COG4 |
| 0.007904 | 4.6064562 | 0.42124 | 1.6472853 | TIMMDC1 |
| 0.031504 | 3.4585313 | -1.86404 | 1.0245517 | CYFIP2 |
| 0.014463 | 4.090242 | -0.60078 | 1.3729502 | MDM2 |
| 0.03467 | 3.3797512 | -2.02092 | 1.2608021 | MGST3 |
| 0.024069 | 3.6656675 | -1.45015 | 1.1355995 | CASP5 |
| 0.005718 | 4.9146753 | 1.02054 | 1.3637605 | RPTOR |
| 0.009194 | 4.4623827 | 0.13796 | 1.5174989 | SEC22B |
| 0.015758 | 4.0167195 | -0.7476 | 1.4006373 | APEH |
| 0.001222 | 7.0495131 | 4.82147 | 1.7336486 | SRPK2 |
| 0.039633 | 3.2745608 | -2.22969 | 1.5764633 | CXCR7 |
| 0.034004 | 3.3970991 | -1.98641 | 3.0631354 | CD177 |
| 0.023171 | 3.7053753 | -1.37067 | 1.2101245 | RCSD1 |
| 0.018545 | 3.8872931 | -1.00646 | 1.4199084 | RHBDD1 |
| 0.002103 | 6.0872529 | 3.19144 | 2.6824251 | MEGF9 |
| 0.015764 | -4.0152896 | -0.75045 | -1.1050296 | PABPC5 |
| 0.010673 | 4.345258 | -0.09357 | 1.153719 | DLGAP4 |
| 0.023942 | 3.6715799 | -1.43831 | 1.4260523 | AGAP3 |
| 0.017728 | 3.9250799 | -0.93084 | 1.0029557 | PPP2R5C |
| 0.012385 | 4.217006 | -0.34819 | 1.2834967 | PLRG1 |
| 0.002153 | 6.0578373 | 3.13938 | 2.025492 | MAEA |
| 0.003684 | 5.3549861 | 1.85767 | 2.1909103 | ACADM |
| 0.014131 | 4.1102752 | -0.56081 | 1.1844126 | SENP3 |
| 0.017211 | 3.9483467 | -0.8843 | 1.0605291 | PIGV |
| 0.022604 | 3.7262958 | -1.32879 | 1.0610444 | INPP5D |
| 0.033229 | 3.4161989 | -1.94838 | 1.5018518 | PDSS2 |
| 0.003528 | 5.4007417 | 1.94324 | 1.4979756 | POMP |
| 0.015286 | 4.0481314 | -0.68484 | 1.3515124 | SNX13 |
| 0.049434 | 3.1104638 | -2.55325 | 1.2089621 | SUCLG1 |
| 0.014133 | 4.1098537 | -0.56165 | 1.0720563 | CUL4A |
| 0.006078 | 4.8675113 | 0.92948 | 2.8308698 | ST3GAL2 |
| 0.016817 | 3.9645312 | -0.85193 | 1.4080179 | ATF7IP |
| 0.033782 | 3.4025029 | -1.97565 | 1.4238304 | SLC15A4 |
| 0.012565 | 4.204218 | -0.37364 | 1.5066298 | FAM118B |
| 0.037438 | 3.3212225 | -2.13719 | 1.1268078 | N4BP2L1 |
| 0.018454 | 3.8925381 | -0.99596 | 1.3939693 | YWHAB |
| 0.001447 | 6.5335185 | 3.96514 | 1.8795006 | RAB22A |
| 0.040108 | 3.2667609 | -2.24514 | 1.0647665 | GSK3B |
| 0.020325 | 3.8066206 | -1.16796 | 1.169153 | CALM1 |
| 0.010914 | 4.3264067 | -0.13093 | 1.3218321 | ATG4B |
| 0.028604 | 3.5361048 | -1.70922 | 1.1784015 | LDLRAD4 |
| 0.011312 | 4.2927298 | -0.19773 | 1.2814273 | SYT12 |
| 0.023705 | 3.6821418 | -1.41718 | 1.2209477 | HS1BP3 |
| 0.004904 | 5.0606326 | 1.30069 | 1.3354393 | ADAM19 |
| 0.002948 | 5.615777 | 2.3415 | 3.1320586 | MMP25 |
| 0.003075 | 5.5742408 | 2.26507 | 1.9450395 | ZNF573 |
| 0.034008 | 3.3969187 | -1.98676 | 1.8003608 | ETS2 |
| 0.004279 | 5.183623 | 1.53476 | 2.9760003 | VNN2 |
| 0.007553 | 4.6589071 | 0.52391 | 1.9353276 | ATP6V1B2 |
| 0.010251 | 4.3788285 | -0.0271 | 1.278528 | GLT8D1 |
| 0.004444 | 5.1518108 | 1.4744 | 2.3457677 | CAMKK2 |
| 0.004322 | 5.1751094 | 1.51862 | 2.1156605 | RAB27A |
| 0.024984 | 3.6363746 | -1.50876 | 1.5020452 | DUSP6 |
| 0.025661 | 3.6165258 | -1.54847 | 1.2649682 | ACOT9 |
| 0.030137 | 3.4947641 | -1.79176 | 1.4147007 | CTTN |
| 0.047609 | 3.1375863 | -2.49998 | 1.1845188 | SH3BGRL2 |
| 0.035874 | 3.3536546 | -2.07279 | 1.7618043 | MIDN |
| 0.005985 | 4.8785392 | 0.9508 | 1.4290446 | CARS |
| 0.006811 | 4.7549519 | 0.7112 | 1.1673027 | GNB1 |
| 0.019311 | 3.8503926 | -1.08032 | 1.1710205 | RUFY1 |
| 0.001388 | 6.6523088 | 4.16592 | 4.2189632 | MME |
| 0.008394 | 4.5518895 | 0.31417 | 1.5171638 | PSD4 |
| 0.025218 | 3.62832 | -1.52487 | 1.0516691 | TMEM180 |
| 0.012256 | 4.2249359 | -0.33242 | 1.3281233 | SRSF7 |
| 0.025292 | 3.6257723 | -1.52997 | 1.3549813 | EIF2C1 |
| 0.00642 | 4.8136848 | 0.82527 | 1.6065459 | BCL2L13 |
| 0.006848 | 4.749055 | 0.69973 | 1.7748997 | NOTCH1 |
| 0.005343 | 4.9759919 | 1.13853 | 1.5370267 | PMM2 |
| 0.016364 | 3.9847263 | -0.81155 | 1.3334366 | BCL11A |
| 0.041983 | 3.2271203 | -2.32353 | 1.2595034 | UPP1 |
| 0.001438 | 6.5531125 | 3.99841 | 1.6671601 | AARS |
| 0.004542 | 5.1313706 | 1.43555 | 1.5801172 | WSB1 |
| 0.043054 | 3.2079109 | -2.36146 | 1.0025031 | TMEM131 |
| 0.009649 | 4.4236008 | 0.06141 | 1.4453973 | APBB3 |
| 0.005162 | 5.0061833 | 1.19647 | 1.4767219 | MGME1 |
| 0.03406 | 3.3956704 | -1.98925 | 1.1183418 | RPAP3 |
| 0.001447 | 6.5181894 | 3.93907 | 1.6651221 | PHRF1 |
| 0.001347 | 6.7935873 | 4.40189 | 2.4391025 | PAGR1 |
| 0.02072 | 3.7918983 | -1.19743 | 1.277266 | CLPB |
| 0.005008 | 5.0395475 | 1.26037 | 2.1102771 | REPS2 |
| 0.040236 | -3.2632328 | -2.25212 | -1.232394 | GRIA2 |
| 0.005154 | 5.0081507 | 1.20024 | 1.6116508 | SETDB1 |
| 0.013464 | 4.1472934 | -0.487 | 1.0789546 | LOC729678 |
| 0.028141 | -3.5481796 | -1.6851 | -1.0173693 | WDR17 |
| 0.003639 | 5.3673759 | 1.88087 | 1.752773 | FAM120B |
| 0.025661 | 3.6165831 | -1.54835 | 1.5867709 | AGFG1 |
| 0.030895 | 3.4731277 | -1.83493 | 1.5297377 | TBC1D24 |
| 0.017717 | 3.926188 | -0.92862 | 1.5503896 | POR |
| 0.012662 | 4.1981877 | -0.38564 | 1.2641922 | IMMP1L |
| 0.008992 | 4.4861102 | 0.18474 | 1.1075047 | CARHSP1 |
| 0.007948 | 4.6026672 | 0.41381 | 2.0493175 | CFLAR |
| 0.038353 | 3.3012124 | -2.17688 | 1.2746892 | MARS |
| 0.009983 | 4.399699 | 0.01418 | 1.3393703 | SMIM7 |
| 0.001691 | 6.3165793 | 3.59283 | 2.249141 | HSD17B4 |
| 0.027909 | -3.5529041 | -1.67566 | -1.1591626 | MEIS2 |
| 0.014573 | 4.0829255 | -0.61538 | 1.5095545 | DDX18 |
| 0.019652 | 3.834188 | -1.11276 | 1.0649568 | STK38 |
| 0.040265 | 3.261331 | -2.25588 | 1.0329886 | PFKL |
| 0.046104 | 3.1615344 | -2.45287 | 1.0677054 | EHD3 |
| 0.003978 | 5.265331 | 1.68921 | 1.7439808 | GMPR2 |
| 0.021367 | 3.7706075 | -1.24007 | 1.153519 | KIAA0040 |
| 0.007489 | 4.6682704 | 0.5422 | 1.1731312 | DHDDS |
| 0.035526 | 3.3596257 | -2.06093 | 1.1550242 | KXD1 |
| 0.044419 | 3.1856804 | -2.40531 | 1.2825969 | TRIM14 |
| 0.022609 | 3.7247602 | -1.33186 | 1.0612418 | CCDC135 |
| 0.026249 | 3.5978784 | -1.58576 | 1.7305228 | SH2B2 |
| 0.036781 | 3.3338012 | -2.11223 | 1.1577009 | PNOC |
| 0.004773 | 5.0843017 | 1.34588 | 1.6713901 | NSMAF |
| 0.032491 | 3.4351364 | -1.91066 | 1.133735 | KLHL8 |
| 0.048652 | 3.1216401 | -2.53131 | 1.2083858 | CPNE5 |
| 0.001583 | 6.3877217 | 3.71572 | 2.0690324 | CLCN3 |
| 0.002985 | 5.5987471 | 2.3102 | 1.9685432 | APAF1 |
| 0.028016 | 3.5504611 | -1.68054 | 1.0794944 | ATRN |
| 0.040265 | 3.2620496 | -2.25446 | 1.4801007 | CTTNBP2NL |
| 0.027538 | 3.562086 | -1.65731 | 1.1273597 | CCND2 |
| 0.002621 | 5.756174 | 2.598 | 1.2967248 | LTB |
| 0.024896 | 3.639043 | -1.50342 | 1.1090061 | ZC3H12C |
| 0.012132 | 4.2343234 | -0.31375 | 1.5175738 | TTC21A |
| 0.027538 | 3.5630225 | -1.65544 | 1.0887282 | MICALL2 |
| 0.014771 | 4.0725272 | -0.63613 | 1.2685329 | CAD |
| 0.012289 | 4.2222705 | -0.33772 | 1.9176781 | GCA |
| 0.023201 | 3.7045332 | -1.37235 | 1.5930112 | RTFDC1 |
| 0.001369 | 6.6940616 | 4.23598 | 2.315953 | PHF23 |
| 0.007684 | 4.6387469 | 0.48448 | 1.3678586 | AKTIP |
| 0.004268 | 5.1884342 | 1.54388 | 2.5896939 | CSF3R |
| 0.01065 | 4.3470093 | -0.0901 | 1.3291108 | NCOA3 |
| 0.007666 | 4.6448864 | 0.49649 | 1.0845807 | CCBL1 |
| 0.006503 | 4.8023141 | 0.80321 | 2.0195597 | SOD2 |
| 0.040834 | 3.2513812 | -2.27557 | 1.7993916 | ITGAX |
| 0.017319 | 3.9421146 | -0.89676 | 1.2528855 | UBE2B |
| 0.021362 | 3.7712459 | -1.23879 | 1.4823487 | GYS1 |
| 0.01629 | 3.9889347 | -0.80313 | 2.1360762 | SLC16A3 |
| 0.029094 | -3.5226201 | -1.73615 | -1.1115064 | THSD4 |
| 0.011087 | 4.3115778 | -0.16034 | 1.2696378 | FBXO18 |
| 0.004444 | 5.1528658 | 1.4764 | 1.3228213 | NEK6 |
| 0.010512 | 4.3567084 | -0.07089 | 1.7286041 | CD9 |
| 0.011989 | -4.2426008 | -0.2973 | -1.4194201 | AP1S3 |
| 0.004268 | 5.1871362 | 1.54142 | 1.1992792 | SPTAN1 |
| 0.035148 | 3.36776 | -2.04476 | 1.2008168 | RNASET2 |
| 0.001222 | 7.2628132 | 5.16346 | 2.6717307 | BAZ2B |
| 0.019544 | 3.8408725 | -1.09938 | 1.021186 | RECK |
| 0.002454 | 5.8319894 | 2.73533 | 1.7732538 | ARHGAP30 |
| 0.001355 | 6.7383757 | 4.31004 | 1.9710171 | UNC45A |
| 0.002948 | 5.6105581 | 2.33191 | 1.7391381 | IFIH1 |
| 0.017502 | 3.9340195 | -0.91296 | 1.6294467 | EIF4A3 |
| 0.001222 | 7.0598769 | 4.83825 | 1.9939015 | RABEP1 |
| 0.00878 | 4.5087942 | 0.22941 | 1.4161031 | FRY |
| 0.002492 | 5.8120882 | 2.69936 | 1.9038561 | SLC25A19 |
| 0.032853 | 3.4252392 | -1.93038 | 2.2415384 | PADI4 |
| 0.003834 | 5.3149028 | 1.78249 | 2.6303404 | APBB1IP |
| 0.018601 | 3.8854051 | -1.01024 | 1.3236431 | CBX8 |
| 0.045736 | 3.1670802 | -2.44196 | 1.0250613 | EIF4G3 |
| 0.019474 | 3.8442174 | -1.09268 | 1.0738641 | TAF15 |
| 0.0074 | 4.6810723 | 0.56721 | 1.5135444 | LY9 |
| 0.003383 | 5.4805617 | 2.09182 | 1.5030302 | CDK13 |
| 0.037028 | 3.3292205 | -2.12132 | 1.4781442 | PTK2B |
| 0.003978 | 5.2683937 | 1.69498 | 2.8400629 | PHOSPHO1 |
| 0.01326 | 4.159985 | -0.46171 | 1.7096428 | CWC25 |
| 0.002475 | 5.8216293 | 2.71661 | 1.3572474 | STX17 |
| 0.011927 | 4.2474605 | -0.28764 | 1.431611 | UBA1 |
| 0.002532 | 5.7880642 | 2.65587 | 3.7060805 | TNFAIP6 |
| 0.009538 | 4.4345774 | 0.08309 | 1.4601027 | TMEM140 |
| 0.00696 | 4.7363797 | 0.67506 | 1.3245476 | INPP5A |
| 0.023419 | 3.6953828 | -1.39067 | 1.1996556 | NUPL2 |
| 0.034718 | 3.3785563 | -2.02329 | 1.3175902 | ITPK1 |
| 0.005585 | 4.94129 | 1.07181 | 2.0269049 | MYO1F |
| 0.015514 | 4.0351475 | -0.71078 | 1.0584655 | PAAF1 |
| 0.044681 | 3.1818118 | -2.41294 | 1.2935608 | RB1 |
| 0.019073 | 3.8605835 | -1.05992 | 1.6644713 | USB1 |
| 0.002448 | 5.852079 | 2.77158 | 2.3265512 | SEMA4A |
| 0.017211 | 3.9479123 | -0.88516 | 1.0409705 | MRPS36 |
| 0.012192 | 4.2299722 | -0.32241 | 1.595218 | ATP6V1A |
| 0.011252 | 4.2969675 | -0.18932 | 1.1132856 | AGPAT1 |
| 0.037875 | 3.3121097 | -2.15527 | 1.4603861 | SLC40A1 |
| 0.011136 | 4.3080033 | -0.16743 | 1.5353945 | HOMER3 |
| 0.011803 | 4.2558926 | -0.27088 | 1.3846965 | ACAP2 |
| 0.002083 | 6.1036095 | 3.22033 | 2.1676309 | FGD3 |
| 0.032899 | 3.4234299 | -1.93398 | 1.27166 | IL24 |
| 0.004966 | 5.0492926 | 1.27901 | 1.8436993 | ITGA2B |
| 0.035874 | 3.3538047 | -2.0725 | 1.202415 | KHK |
| 0.003978 | 5.2643582 | 1.68737 | 2.3581853 | EEPD1 |
| 0.001459 | 6.5016889 | 3.91096 | 1.9966877 | ARMC7 |
| 0.016587 | 3.9730614 | -0.83487 | 1.9774331 | KIAA0226L |
| 0.037985 | 3.3099556 | -2.15955 | 1.1755926 | RIN3 |
| 0.003512 | 5.4069917 | 1.9549 | 1.7162401 | PRDM2 |
| 0.030779 | 3.4769818 | -1.82724 | 1.0876363 | IKBKB |
| 0.029849 | 3.5052343 | -1.77086 | 1.1947538 | ASPH |
| 0.005124 | 5.0145995 | 1.2126 | 1.3626089 | CNNM3 |
| 0.040659 | 3.2539226 | -2.27054 | 1.1129038 | DECR1 |
| 0.002352 | 5.9107676 | 2.87713 | 1.5345787 | F11R |
| 0.001986 | 6.1701826 | 3.33752 | 1.9251647 | DGCR2 |
| 0.009597 | 4.4300486 | 0.07415 | 1.5735136 | ADAP2 |
| 0.011162 | 4.3030669 | -0.17722 | 1.298983 | CHMP5 |
| 0.043764 | 3.1971609 | -2.38267 | 1.2837555 | C1RL |
| 0.006731 | 4.7676658 | 0.73592 | 1.4048248 | PSKH1 |
| 0.004176 | 5.2081617 | 1.58123 | 1.1958122 | WHSC1L1 |
| 0.001338 | 6.8779563 | 4.54132 | 2.2220801 | SEMA4B |
| 0.030137 | 3.4941717 | -1.79294 | 1.2185252 | LIN37 |
| 0.018977 | -3.8669957 | -1.04708 | -1.2141331 | PDE10A |
| 0.005124 | 5.0155399 | 1.21441 | 1.7848494 | GIT2 |
| 0.0248 | 3.6416706 | -1.49817 | 1.2168905 | SNX10 |
| 0.0074 | 4.6814551 | 0.56796 | 1.1175253 | AP1S1 |
| 0.003834 | 5.3220126 | 1.79584 | 1.9609752 | ATXN3 |
| 0.006226 | 4.8461105 | 0.88809 | 1.8572817 | DDX25 |
| 0.017781 | 3.9217772 | -0.93745 | 1.1536214 | PLEKHM1 |
| 0.019152 | 3.8574225 | -1.06625 | 1.6563905 | TIGIT |
| 0.00211 | 6.0764709 | 3.17237 | 1.7835901 | MPP1 |
| 0.000978 | 8.511896 | 7.02895 | 3.2426213 | SELPLG |
| 0.004975 | 5.0472314 | 1.27507 | 2.633601 | CEBPE |
| 0.002448 | 5.8376458 | 2.74554 | 1.6703626 | PIK3CD |
| 0.005506 | 4.9545693 | 1.09736 | 1.7914751 | TMEM165 |
| 0.007279 | 4.695741 | 0.59584 | 1.5214982 | NSF |
| 0.001621 | 6.3478015 | 3.64686 | 1.8666489 | GOSR2 |
| 0.007863 | 4.6176669 | 0.44321 | 1.7104064 | MAP3K11 |
| 0.027678 | 3.5585801 | -1.66432 | 1.1120154 | ELMOD3 |
| 0.002985 | 5.5988921 | 2.31046 | 2.9878221 | PGBD2 |
| 0.026039 | 3.6044684 | -1.57258 | 1.4270021 | ENO1 |
| 0.021468 | 3.7662966 | -1.2487 | 1.7672488 | MYL9 |
| 0.018509 | 3.88893 | -1.00318 | 1.2446458 | SLC4A2 |
| 0.019182 | 3.8560333 | -1.06903 | 1.0457223 | CENPJ |
| 0.019131 | 3.858724 | -1.06364 | 1.0869425 | RAPGEF6 |
| 0.019568 | 3.8396703 | -1.10179 | 1.1405214 | SMG5 |
| 0.003855 | 5.3024067 | 1.759 | 1.7585975 | STAT5B |
| 0.004773 | 5.0839221 | 1.34516 | 1.4226366 | TOP3A |
| 0.024984 | 3.6360433 | -1.50942 | 1.3334014 | C16orf55 |
| 0.030586 | 3.4818835 | -1.81746 | 1.2306816 | LOC101059922 |
| 0.007904 | 4.6062121 | 0.42076 | 1.5638948 | SQRDL |
| 0.04114 | 3.2438375 | -2.29049 | 1.2492651 | TBCD |
| 0.016063 | 4.0002131 | -0.78059 | 1.0452436 | BFAR |
| 0.02649 | 3.5911276 | -1.59926 | 1.0357864 | CABIN1 |
| 0.047239 | 3.1443401 | -2.4867 | 1.032697 | ARRB2 |
| 0.027455 | 3.5661652 | -1.64916 | 1.3387375 | SLC26A8 |
| 0.024429 | 3.6547365 | -1.47202 | 1.1631778 | IKZF1 |
| 0.003855 | 5.3030915 | 1.76029 | 1.3308372 | COG6 |
| 0.027707 | 3.5577652 | -1.66595 | 1.0680244 | NOTCH4 |
| 0.010444 | 4.3611413 | -0.06211 | 1.1232096 | RTN4 |
| 0.001342 | 6.8465827 | 4.4896 | 1.5532437 | BAZ1A |
| 0.040838 | 3.2510894 | -2.27615 | 1.2090496 | DOCK8 |
| 0.022851 | 3.7164519 | -1.34849 | 1.4843905 | CLU |
| 0.023596 | 3.6852053 | -1.41104 | 1.0619892 | VBP1 |
| 0.021699 | 3.7556565 | -1.27 | 1.285019 | MX1 |
| 0.005116 | 5.0201237 | 1.22319 | 1.7983136 | FAM131A |
| 0.014567 | 4.0839265 | -0.61338 | 1.332123 | PXMP4 |
| 0.029795 | 3.5064915 | -1.76835 | 1.6099468 | GNAZ |
| 0.045625 | 3.1684711 | -2.43922 | 1.3972595 | ARHGAP9 |
| 0.021856 | 3.7510872 | -1.27915 | 1.4784456 | ATP10D |
| 0.011413 | 4.2853356 | -0.21241 | 1.2169418 | MGAT4B |
| 0.018505 | 3.8895456 | -1.00195 | 1.0757656 | BHLHE41 |
| 0.033284 | 3.4152707 | -1.95023 | 1.3460435 | NECAP2 |
| 0.030895 | 3.4736007 | -1.83398 | 1.5766096 | LPIN2 |
| 0.000978 | 8.502304 | 7.01549 | 2.0759713 | HN1L |
| 0.043814 | 3.1962993 | -2.38437 | 2.746936 | LTF |
| 0.003741 | 5.3427823 | 1.8348 | 1.4889879 | CCDC97 |
| 0.009152 | 4.4676781 | 0.14841 | 1.7463491 | HPS5 |
| 0.009773 | 4.4157199 | 0.04584 | 2.0470254 | SLC12A9 |
| 0.039447 | 3.277912 | -2.22306 | 1.2081163 | ANKZF1 |
| 0.002192 | 6.0389357 | 3.10585 | 2.6229327 | SPIB |
| 0.039336 | 3.2800069 | -2.21891 | 1.0116361 | MS4A1 |
| 0.023803 | 3.6776232 | -1.42622 | 1.0858591 | NEURL4 |
| 0.003493 | 5.4168613 | 1.97331 | 1.9095725 | ZFYVE16 |
| 0.005747 | 4.9074734 | 1.00665 | 2.1270009 | EMR3 |
| 0.034118 | 3.3940164 | -1.99254 | 1.103746 | ARV1 |
| 0.002244 | 5.9930957 | 3.02433 | 1.9141544 | TPST2 |
| 0.005676 | 4.9237233 | 1.03798 | 2.053588 | TALDO1 |
| 0.036224 | 3.3454901 | -2.08901 | 1.0363859 | FBXO22 |
| 0.037219 | 3.3257586 | -2.12819 | 1.1012614 | RNF219 |
| 0.022609 | 3.7249184 | -1.33154 | 1.71424 | RCN3 |
| 0.017278 | -3.9449713 | -0.89105 | -1.1045028 | TMPRSS2 |
| 0.001222 | 7.2837683 | 5.19668 | 2.3679493 | KLHL6 |
| 0.009152 | 4.4680632 | 0.14917 | 1.3897426 | VPS33A |
| 0.025598 | 3.6180783 | -1.54536 | 1.1741606 | SLC37A3 |
| 0.004804 | 5.0780797 | 1.33401 | 2.0078065 | PINK1 |
| 0.0028 | 5.6949961 | 2.48658 | 2.4222156 | STK40 |
| 0.01954 | 3.8422135 | -1.0967 | 1.1106539 | TP53RK |
| 0.015725 | 4.0192969 | -0.74245 | 1.1261955 | CEP250 |
| 0.011136 | 4.306294 | -0.17082 | 1.2342035 | FNBP1 |
| 0.030017 | 3.4984898 | -1.78433 | 1.3052135 | VWF |
| 0.006022 | 4.874161 | 0.94234 | 2.0727012 | ST3GAL6 |
| 0.003088 | 5.5708023 | 2.25874 | 3.3787424 | ARG1 |
| 0.018366 | 3.8962848 | -0.98846 | 1.9100234 | NQO2 |
| 0.007684 | 4.6389325 | 0.48484 | 2.3897411 | ADM |
| 0.005705 | 4.9182891 | 1.0275 | 1.4163426 | AURKB |
| 0.032804 | 3.426787 | -1.9273 | 1.0826248 | MTMR8 |
| 0.046073 | 3.1619747 | -2.45201 | 1.836694 | OAS1 |
| 0.004434 | 5.1564554 | 1.48322 | 2.0410456 | CD53 |
| 0.005747 | 4.9087715 | 1.00915 | 1.7281517 | GBA2 |
| 0.002496 | 5.807055 | 2.69026 | 1.6832023 | VRK3 |
| 0.002055 | 6.1185864 | 3.24676 | 1.7114119 | CYB5B |
| 0.001607 | 6.3576713 | 3.66391 | 4.7080641 | MYOM2 |
| 0.001369 | 6.7043858 | 4.25326 | 1.7204184 | PI4K2B |
| 0.042961 | 3.209183 | -2.35895 | 1.1825542 | CNP |
| 0.006492 | 4.8041694 | 0.80681 | 1.6583741 | EGLN3 |
| 0.003741 | 5.3434782 | 1.83611 | 1.3594528 | C7orf49 |
| 0.02731 | 3.5693311 | -1.64283 | 1.0650761 | SLC43A1 |
| 0.013145 | 4.1679259 | -0.44589 | 1.1577196 | SARS |
| 0.002192 | 6.0302995 | 3.09052 | 2.2751178 | CTDSP1 |
| 0.001369 | 6.7035765 | 4.25191 | 2.8581772 | SPHK2 |
| 0.008739 | 4.5118405 | 0.23541 | 1.5292868 | APTX |
| 0.002923 | 5.6340082 | 2.37497 | 1.5469972 | ZNF638 |
| 0.01606 | 4.0005516 | -0.77991 | 1.2790216 | RNF207 |
| 0.026212 | 3.5995817 | -1.58235 | 2.551486 | TRIB1 |
| 0.006963 | 4.7348254 | 0.67203 | 1.8279975 | LTB4R |
| 0.001388 | 6.6369511 | 4.14009 | 1.913831 | SLC35E3 |
| 0.024251 | 3.660183 | -1.46112 | 1.4724367 | GLB1 |
| 0.006913 | 4.7422984 | 0.68658 | 1.8659007 | NUMB |
| 0.01092 | 4.325469 | -0.13279 | 1.6481435 | ABHD4 |
| 0.004675 | 5.1041003 | 1.38363 | 1.9853877 | CARD8 |
| 0.021604 | 3.7606959 | -1.25991 | 1.3671285 | RAD51 |
| 0.00691 | 4.7440818 | 0.69005 | 1.0743073 | KIAA2026 |
| 0.043089 | -3.2071721 | -2.36292 | -1.0776633 | EVPL |
| 0.015803 | 4.0127956 | -0.75544 | 1.6194778 | DENND2D |
| 0.04804 | 3.1309155 | -2.51309 | 1.1366978 | GGN |
| 0.012385 | 4.2157432 | -0.35071 | 1.3381214 | SLC6A4 |
| 0.008331 | 4.5572246 | 0.32465 | 1.7165297 | BANP |
| 0.029313 | 3.5169838 | -1.74741 | 1.1485527 | EFNA4 |
| 0.013145 | 4.1685245 | -0.4447 | 1.3320752 | PACSIN2 |
| 0.006632 | 4.7852701 | 0.77013 | 1.5645137 | PDXK |
| 0.010893 | 4.3297627 | -0.12428 | 1.45781 | ZNF594 |
| 0.009103 | 4.4724609 | 0.15784 | 1.5063664 | TIGD7 |
| 0.002352 | 5.9189897 | 2.89187 | 1.7549909 | ZBED1 |
| 0.030226 | 3.4908156 | -1.79964 | 1.0156967 | ASB16 |
| 0.024945 | 3.6376088 | -1.50629 | 1.1541714 | NUP214 |
| 0.011725 | 4.2624342 | -0.25789 | 1.4755602 | IL3RA |
| 0.009408 | 4.4477219 | 0.10904 | 1.2117521 | ABHD3 |
| 0.005718 | 4.9140269 | 1.01929 | 1.3666759 | NME6 |
| 0.008559 | 4.5325929 | 0.27624 | 1.3701395 | EIF2B2 |
| 0.012934 | 4.1814487 | -0.41896 | 1.4217681 | PFKP |
| 0.030058 | 3.4964991 | -1.7883 | 1.0866325 | LAT |
| 0.02001 | 3.8192846 | -1.1426 | 1.0783637 | KIAA0226 |
| 0.002083 | 6.1026438 | 3.21863 | 2.0475803 | FAM101B |
| 0.012666 | 4.1977721 | -0.38647 | 1.7875652 | ZBTB48 |
| 0.009005 | 4.4820506 | 0.17674 | 1.3949085 | MTF1 |
| 0.048164 | 3.1286869 | -2.51747 | 1.1283173 | ADI1 |
| 0.017211 | 3.9481336 | -0.88472 | 1.1693126 | FADS1 |
| 0.002332 | 5.9598785 | 2.96506 | 2.2848928 | CCR3 |
| 0.022394 | 3.7342771 | -1.31281 | 1.0311344 | MYL12B |
| 0.001222 | 7.0328823 | 4.79451 | 1.9074595 | TRIM38 |
| 0.002665 | 5.7375486 | 2.56414 | 1.5581944 | SEMA4D |
| 0.03091 | 3.4723531 | -1.83647 | 1.6165019 | GLIPR1 |
| 0.015445 | 4.038549 | -0.70398 | 2.1812126 | PLIN4 |
| 0.015758 | 4.0163941 | -0.74825 | 1.4707687 | MOB3A |
| 0.030927 | 3.4719433 | -1.83729 | 1.0032898 | ETFDH |
| 0.019544 | 3.8412505 | -1.09862 | 2.5092924 | ACSL1 |
| 0.034118 | 3.3934582 | -1.99365 | 1.3504487 | ABCB9 |
| 0.025078 | 3.6332656 | -1.51498 | 1.3828565 | SH3BP1 |
| 0.010871 | 4.3319541 | -0.11993 | 2.1139488 | GBE1 |
| 0.008311 | 4.5597454 | 0.3296 | 1.6616568 | C15orf37 |
| 0.003533 | 5.3967029 | 1.93569 | 1.663656 | BRICD5 |
| 0.002359 | 5.8913577 | 2.84228 | 1.9993049 | IFNAR2 |
| 0.014206 | 4.1048856 | -0.57156 | 1.3612985 | GPR141 |
| 0.008244 | 4.56941 | 0.34857 | 1.3998803 | PLCG2 |
| 0.038334 | 3.3025518 | -2.17423 | 1.088005 | ANKFY1 |
| 0.000978 | 8.176527 | 6.55058 | 3.0664942 | SLC46A2 |
| 0.03347 | 3.4102619 | -1.96021 | 1.1929034 | BCAT2 |
| 0.007445 | 4.6750418 | 0.55543 | 2.5644853 | CEACAM1 |
| 0.026872 | 3.5804954 | -1.62052 | 1.5756915 | ISL2 |
| 0.024251 | 3.6602334 | -1.46102 | 1.4674421 | TUBB2A |
| 0.003855 | 5.3018236 | 1.75791 | 1.4668802 | ZNF79 |
| 0.022604 | 3.7264168 | -1.32854 | 1.4806889 | MPZL1 |
| 0.011927 | 4.2473937 | -0.28777 | 2.4908533 | TNFAIP8L2 |
| 0.002352 | 5.9158056 | 2.88616 | 2.4197388 | ALPK1 |
| 0.007815 | 4.6228847 | 0.45343 | 1.6888444 | GFOD2 |
| 0.005948 | 4.8834084 | 0.9602 | 1.6036332 | ZNF559 |
| 0.013047 | 4.1761934 | -0.42943 | 1.8347386 | TCL1B |
| 0.008598 | 4.5274301 | 0.26608 | 1.5043459 | SLC25A44 |
| 0.012098 | 4.235978 | -0.31046 | 1.0070866 | CD151 |
| 0.002539 | 5.7836539 | 2.64788 | 3.4750877 | AATK |
| 0.00211 | 6.0749559 | 3.16969 | 2.6604265 | VPS37C |
| 0.032477 | -3.4354873 | -1.90996 | -1.3964621 | ESR1 |
| 0.010529 | 4.3543738 | -0.07551 | 1.4231971 | RPN1 |
| 0.001294 | 6.966057 | 4.68576 | 2.3887971 | PSEN1 |
| 0.049998 | 3.1026096 | -2.56865 | 1.1262451 | PAPSS1 |
| 0.024251 | 3.6599002 | -1.46169 | 1.1503734 | GABARAPL2 |
| 0.003955 | 5.2767787 | 1.71078 | 1.887884 | RNF13 |
| 0.005928 | 4.8863151 | 0.96582 | 1.7634752 | CANT1 |
| 0.027308 | 3.5697424 | -1.64201 | 1.8568409 | GADD45G |
| 0.013464 | 4.1473721 | -0.48684 | 1.137063 | ACSL5 |
| 0.005245 | 4.9904755 | 1.16634 | 1.5562233 | ACOX3 |
| 0.027975 | 3.5516314 | -1.6782 | 1.2409328 | RILP |
| 0.001222 | 7.286814 | 5.20151 | 2.2777241 | LMAN2L |
| 0.027478 | 3.5652984 | -1.65089 | 1.4197046 | CISD1 |
| 0.001222 | 7.0324137 | 4.79375 | 2.4480771 | FAM129A |
| 0.002352 | 5.9241355 | 2.9011 | 1.8095904 | LPXN |
| 0.036103 | 3.3481291 | -2.08377 | 1.0263121 | CNR2 |
| 0.015031 | 4.0600053 | -0.66113 | 1.2083029 | POLD4 |
| 0.002361 | 5.8892986 | 2.83857 | 1.8046599 | NFE2L1 |
| 0.005747 | 4.90715 | 1.00603 | 1.8819418 | ALOX5 |
| 0.023067 | 3.7098754 | -1.36166 | 1.5177603 | NDUFB3 |
| 0.036163 | 3.3470764 | -2.08586 | 1.0554458 | AFF1 |
| 0.020044 | 3.8178915 | -1.14539 | 1.5761326 | CDIPT |
| 0.000978 | 8.1204546 | 6.46902 | 1.9517205 | C17orf59 |
| 0.006431 | 4.8123437 | 0.82267 | 1.4854966 | M6PR |
| 0.007461 | 4.6709226 | 0.54739 | 1.1855065 | MCCC2 |
| 0.045277 | 3.1731802 | -2.42994 | 1.1068939 | POLR2A |
| 0.010444 | 4.3613349 | -0.06173 | 2.1741515 | NCF4 |
| 0.038678 | 3.2936956 | -2.19178 | 1.18266 | ITFG3 |
| 0.009013 | 4.4803752 | 0.17344 | 2.3339446 | CYSTM1 |
| 0.026709 | 3.584504 | -1.6125 | 1.2245933 | DNAJC17 |
| 0.017319 | 3.9419833 | -0.89702 | 1.5031683 | IFI16 |
| 0.00249 | 5.8141372 | 2.70307 | 2.5558161 | ARFRP1 |
| 0.038505 | 3.297385 | -2.18447 | 1.3382879 | PGD |
| 0.010925 | 4.32497 | -0.13378 | 1.4127045 | DPY30 |
| 0.041519 | 3.2359982 | -2.30599 | 1.4104981 | SIDT2 |
| 0.009319 | 4.4547676 | 0.12294 | 1.3906776 | MEN1 |
| 0.008559 | 4.5329965 | 0.27703 | 2.286645 | PDLIM7 |
| 0.037028 | 3.3291765 | -2.12141 | 2.617812 | FOLR3 |
| 0.004928 | 5.0550744 | 1.29007 | 1.2496883 | PRKAR1B |
| 0.0014 | 6.6103787 | 4.0953 | 2.3901773 | DHRS13 |
| 0.035065 | 3.3703496 | -2.03961 | 1.2764974 | SLC7A11 |
| 0.003834 | 5.3193908 | 1.79092 | 1.918617 | SIPA1 |
| 0.009538 | 4.4355232 | 0.08496 | 1.2909225 | TIMM17B |
| 0.013312 | 4.1572219 | -0.46722 | 1.1617448 | FAM111A |
| 0.003383 | 5.4788703 | 2.08868 | 1.4180066 | TMEM55A |
| 0.004871 | 5.0665523 | 1.312 | 2.0521943 | DNTTIP1 |
| 0.03252 | 3.4337496 | -1.91343 | 1.1338944 | H2AFJ |
| 0.003487 | 5.4281896 | 1.99443 | 1.6390448 | MAT2A |
| 0.007901 | 4.6092587 | 0.42673 | 1.3383657 | DYNC1I2 |
| 0.048515 | 3.1236513 | -2.52736 | 1.5109819 | SERPINB9 |
| 0.007594 | 4.6545641 | 0.51541 | 1.352325 | APOL1 |
| 0.045892 | 3.1648812 | -2.44629 | 2.2125058 | TLR5 |
| 0.000978 | 8.7045948 | 7.29662 | 2.170496 | ACTN1 |
| 0.016412 | 3.9806871 | -0.81962 | 1.3996181 | SPRED1 |
| 0.016766 | 3.9664199 | -0.84815 | 1.2650811 | ABCA7 |
| 0.004156 | 5.2135345 | 1.5914 | 2.1011718 | FAM20C |
| 0.012685 | 4.1956879 | -0.39061 | 2.1469908 | SLC11A1 |
| 0.001148 | 7.8027811 | 5.99825 | 2.0418378 | ZNF526 |
| 0.015154 | 4.054617 | -0.67189 | 1.225457 | HES4 |
| 0.028288 | 3.5430835 | -1.69528 | 1.5571679 | TMEM121 |
| 0.001355 | 6.7523865 | 4.33339 | 2.2660936 | OSTM1 |
| 0.025661 | 3.616272 | -1.54897 | 1.1523548 | RNF170 |
| 0.011753 | 4.2607842 | -0.26116 | 1.2818175 | PMS2 |
| 0.006478 | 4.806696 | 0.81172 | 1.5281207 | RAB33B |
| 0.024422 | 3.6553319 | -1.47083 | 1.2369784 | CELF2 |
| 0.023201 | 3.7044027 | -1.37262 | 1.121239 | CTNNA1 |
| 0.031261 | 3.4640766 | -1.85298 | 1.1045889 | GALNT1 |
| 0.008557 | 4.5341805 | 0.27936 | 1.5663225 | PRKAR1A |
| 0.019707 | 3.8322187 | -1.11671 | 1.1371603 | YIF1B |
| 0.025043 | 3.6342632 | -1.51299 | 1.0650466 | SHARPIN |
| 0.004975 | 5.0465247 | 1.27372 | 1.8774983 | SH2D3C |
| 0.0016 | 6.3697294 | 3.68472 | 2.5522353 | HVCN1 |
| 0.014567 | 4.0835617 | -0.61411 | 1.7330025 | MFSD12 |
| 0.016921 | 3.9595956 | -0.8618 | 1.194487 | CTDSP2 |
| 0.032899 | 3.4239651 | -1.93292 | 1.4158896 | PDGFA |
| 0.014771 | 4.0722698 | -0.63665 | 1.2867059 | PDDC1 |
| 0.046508 | 3.1552683 | -2.46521 | 1.0494073 | F8A1 |
| 0.028341 | 3.5414205 | -1.6986 | 1.2515713 | PRKCZ |
| 0.008825 | 4.5049576 | 0.22186 | 1.5893158 | COBRA1 |
| 0.018977 | 3.8668264 | -1.04742 | 1.1821922 | NEK4 |
| 0.001338 | 6.8617739 | 4.51466 | 2.0264533 | CPSF2 |
| 0.002868 | 5.654765 | 2.41301 | 2.0606189 | USP32 |
| 0.014131 | 4.1101681 | -0.56102 | 1.2493546 | BDNF |
| 0.017148 | 3.9509891 | -0.87901 | 1.0055979 | MYH3 |
| 0.024342 | 3.6576076 | -1.46628 | 1.1330723 | BAG6 |
| 0.002448 | 5.8392955 | 2.74852 | 2.1011627 | PDE4DIP |
| 0.002493 | 5.8091884 | 2.69412 | 2.4784567 | TOR4A |
| 0.002023 | 6.1441795 | 3.29183 | 1.4265516 | DIAPH1 |
| 0.003546 | 5.3912772 | 1.92556 | 2.1563419 | CSF2RA |
| 0.003148 | 5.544314 | 2.20986 | 3.3751386 | FPR1 |
| 0.003401 | 5.4689369 | 2.07023 | 4.6969226 | CXCL1 |
| 0.018236 | 3.9021984 | -0.97663 | 1.2252342 | SORD |
| 0.002023 | 6.1407456 | 3.28579 | 1.4760347 | TOB2 |
| 0.021297 | 3.7732781 | -1.23472 | 1.2663606 | RUVBL2 |
| 0.011725 | 4.2629179 | -0.25693 | 1.3526217 | WIPI1 |
| 0.003401 | 5.4622855 | 2.05787 | 1.609708 | RNF111 |
| 0.024734 | 3.6443023 | -1.4929 | 1.1457561 | UNC50 |
| 0.008272 | 4.564349 | 0.33864 | 1.9880698 | SLC25A20 |
| 0.006226 | 4.8440488 | 0.8841 | 1.6211451 | HCLS1 |
| 0.006334 | 4.828346 | 0.85369 | 1.6625053 | SSH2 |
| 0.022394 | 3.7341779 | -1.31301 | 1.2658657 | RNF135 |
| 0.003955 | 5.2744399 | 1.70637 | 1.3050142 | ADORA2B |
| 0.003493 | 5.4134872 | 1.96702 | 1.6500215 | ING1 |
| 0.001727 | 6.2923967 | 3.55089 | 1.7385605 | ZNF189 |
| 0.017211 | -3.9487817 | -0.88343 | -1.1015023 | NME5 |
| 0.030189 | 3.4926559 | -1.79597 | 1.1085581 | ZDHHC16 |
| 0.010358 | 4.3711433 | -0.04231 | 1.4880838 | MYL6 |
| 0.021889 | 3.7501814 | -1.28096 | 1.8244933 | MAOB |
| 0.001347 | 6.7913498 | 4.39817 | 2.3624279 | ZNF200 |
| 0.004217 | 5.1988779 | 1.56366 | 1.5275599 | SUSD3 |
| 0.044103 | 3.1913889 | -2.39406 | 1.0978146 | PBX2 |
| 0.0273 | 3.5703768 | -1.64074 | 1.0193212 | AMER2 |
| 0.003289 | 5.5039108 | 2.13512 | 1.8673009 | UBE2L3 |
| 0.01428 | 4.1004329 | -0.58044 | 1.2992316 | CHSY1 |
| 0.03252 | 3.4329623 | -1.915 | 1.158416 | SEPHS2 |
| 0.028178 | 3.5473478 | -1.68676 | 1.3923828 | RASA3 |
| 0.001854 | 6.2379073 | 3.45604 | 2.2095328 | DOK3 |
| 0.03914 | 3.2850227 | -2.20897 | 1.124297 | AP5B1 |
| 0.042596 | 3.2154798 | -2.34652 | 1.0599898 | PRR24 |
| 0.001222 | 7.3476633 | 5.29757 | 1.9744132 | MAP2K4 |
| 0.048024 | 3.1311941 | -2.51254 | 1.1112393 | PIP4K2C |
| 0.028811 | 3.5300776 | -1.72126 | 1.1602199 | ZNF140 |
| 0.017381 | 3.9389992 | -0.90299 | 1.0367215 | TMEM65 |
| 0.029615 | 3.5100742 | -1.7612 | 1.1131824 | NDUFA3 |
| 0.003402 | 5.4543398 | 2.0431 | 1.4239251 | HIST1H3D |
| 0.02239 | 3.7349873 | -1.31139 | 1.0410472 | HIST1H3G |
| 0.007218 | 4.7034582 | 0.6109 | 1.7833612 | RHD |
| 0.017976 | 3.914401 | -0.95221 | 1.3499698 | DGAT1 |
| 0.021467 | 3.7666895 | -1.24791 | 1.6929513 | BID |
| 0.007637 | 4.6492645 | 0.50505 | 1.2437591 | ENKD1 |
| 0.023864 | 3.6754918 | -1.43049 | 1.0961349 | CAPZA1 |
| 0.033574 | 3.4076265 | -1.96545 | 1.1551843 | ZNF354A |
| 0.039314 | 3.2808029 | -2.21733 | 1.0039662 | KCNK15 |
| 0.030281 | 3.4892932 | -1.80268 | 1.737776 | NFXL1 |
| 0.008922 | 4.4938213 | 0.19993 | 1.2743797 | ZSWIM1 |
| 0.032477 | 3.4357371 | -1.90947 | 1.1104307 | ARHGEF11 |
| 0.008503 | 4.5424521 | 0.29562 | 1.9292932 | CEBPD |
| 0.038274 | 3.3040071 | -2.17134 | 1.1661958 | TXN |
| 0.023565 | 3.6860832 | -1.40929 | 1.090312 | JUNB |
| 0.021466 | 3.7672494 | -1.24679 | 1.4200488 | AP4E1 |
| 0.014899 | 4.0659226 | -0.64932 | 1.3133865 | C21orf33 |
| 0.015527 | 4.0333845 | -0.7143 | 1.1606041 | PNKD |
| 0.021466 | 3.766896 | -1.2475 | 1.5868427 | FIG4 |
| 0.003497 | 5.410194 | 1.96088 | 1.4459286 | PKNOX1 |
| 0.032415 | 3.4369627 | -1.90703 | 1.1014141 | PRDX2 |
| 0.04642 | -3.15656 | -2.46267 | -1.4295156 | ACYP2 |
| 0.011803 | 4.2558652 | -0.27094 | 1.2369698 | LBR |
| 0.002462 | 5.825824 | 2.72419 | 2.0632729 | RBPMS2 |
| 0.014771 | 4.0736293 | -0.63393 | 2.1751221 | TLR2 |
| 0.001281 | 6.985338 | 4.71721 | 2.0729111 | UBE2J2 |
| 0.002432 | 5.8704077 | 2.8046 | 1.930333 | NRBF2 |
| 0.03637 | 3.3420129 | -2.09592 | 1.0149936 | RSRC1 |
| 0.011107 | 4.3102558 | -0.16296 | 1.5317692 | NAT1 |
| 0.017241 | 3.9468854 | -0.88722 | 1.1132353 | MED22 |
| 0.013145 | 4.1685356 | -0.44468 | 1.1140965 | TMEM185A |
| 0.026362 | 3.5956737 | -1.59017 | 1.2462236 | VPS25 |
| 0.01528 | 4.0499223 | -0.68127 | 1.4819112 | BSG |
| 0.003431 | -5.4413263 | 2.01889 | -1.8224719 | PDZRN4 |
| 0.031429 | 3.4605172 | -1.86008 | 1.1442531 | RNF123 |
| 0.03755 | 3.3186778 | -2.14224 | 1.0004039 | IMP3 |
| 0.027393 | 3.5675611 | -1.64637 | 1.1353389 | GLTPD1 |
| 0.020573 | 3.7970006 | -1.18722 | 1.2608638 | PPP1R18 |
| 0.0016 | 6.3684316 | 3.68248 | 1.7811066 | SAMD9 |
| 0.003546 | 5.3903515 | 1.92383 | 1.4731919 | KLHL9 |
| 0.002357 | 5.8960187 | 2.85065 | 1.4287746 | HIPK3 |
| 0.024002 | 3.6693688 | -1.44274 | 1.0574323 | ARHGEF5 |
| 0.002828 | 5.6846275 | 2.46764 | 1.8857966 | POU2F2 |
| 0.034081 | -3.395079 | -1.99043 | -1.0590684 | C9 |
| 0.023781 | 3.6787235 | -1.42402 | 1.7128523 | SRGN |
| 0.003701 | 5.3512353 | 1.85065 | 2.0450132 | HPCAL1 |
| 0.017454 | 3.9364366 | -0.90812 | 1.4446311 | TRAPPC12 |
| 0.002931 | 5.6297668 | 2.36719 | 1.6562057 | PIH1D1 |
| 0.003622 | 5.371451 | 1.88849 | 3.0147063 | CHST15 |
| 0.0158 | 4.0131699 | -0.75469 | 1.0530191 | TMCC2 |
| 0.00767 | 4.6415226 | 0.48991 | 2.2287851 | TIMP2 |
| 0.020925 | 3.7849086 | -1.21143 | 1.2440239 | HS3ST4 |
| 0.01639 | 3.9823159 | -0.81636 | 1.0773552 | SMCHD1 |
| 0.012247 | 4.2256017 | -0.3311 | 1.6007752 | PARVB |
| 0.048443 | 3.1248111 | -2.52508 | 1.7226964 | PDCD6IP |
| 0.029545 | 3.5117061 | -1.75794 | 1.2177769 | DHRSX |
| 0.043444 | 3.2019583 | -2.37321 | 1.1430773 | ACTR3B |
| 0.006146 | 4.8572933 | 0.90973 | 1.4519874 | LCLAT1 |
| 0.019568 | 3.839552 | -1.10202 | 1.6436188 | SLC7A1 |
| 0.009826 | 4.4111682 | 0.03685 | 1.2376753 | RPP25L |
| 0.00755 | 4.659536 | 0.52513 | 2.1659183 | RAB24 |
| 0.019756 | 3.8298701 | -1.12141 | 2.1452225 | DENND3 |
| 0.041518 | 3.236126 | -2.30573 | 1.2279241 | CCDC53 |
| 0.005718 | 4.9147759 | 1.02073 | 1.7459856 | ZSCAN21 |
| 0.015372 | 4.043221 | -0.69465 | 1.0289432 | DOLPP1 |
| 0.00391 | 5.29145 | 1.7384 | 1.6402324 | FAM211A |
| 0.019859 | 3.8256225 | -1.12991 | 1.0241238 | HECTD3 |
| 0.020263 | 3.8092124 | -1.16277 | 1.0692515 | SMIM12 |
| 0.025507 | 3.6200983 | -1.54132 | 1.7364593 | INHBA |
| 0.019939 | 3.8223295 | -1.1365 | 1.2620621 | TM7SF2 |
| 0.019311 | 3.8502699 | -1.08057 | 1.474486 | COA4 |
| 0.031635 | 3.4558301 | -1.86942 | 1.1992176 | DHRS7 |
| 0.030895 | 3.4737389 | -1.83371 | 1.2378809 | HS3ST1 |
| 0.0248 | 3.6420215 | -1.49746 | 1.3966972 | PPP1R3D |
| 0.01052 | 4.3559949 | -0.0723 | 1.0892467 | MAX |
| 0.004444 | 5.1505039 | 1.47192 | 1.7058552 | TRAPPC8 |
| 0.007815 | 4.6222083 | 0.4521 | 1.1556808 | RTP4 |
| 0.019652 | 3.8341501 | -1.11284 | 1.1514023 | HIST1H4C |
| 0.012422 | 4.2129326 | -0.3563 | 1.6210458 | ZNF516 |
| 0.003854 | 5.3088075 | 1.77103 | 1.3778348 | TRIM68 |
| 0.001294 | 6.968905 | 4.69041 | 2.8621737 | CCR5 |
| 0.034615 | 3.3814475 | -2.01754 | 1.0699031 | SEMA6C |
| 0.037035 | 3.3289538 | -2.12185 | 1.9764259 | LIPM |
| 0.022471 | 3.7314658 | -1.31844 | 1.5509497 | FHL3 |
| 0.033009 | 3.4211637 | -1.9385 | 1.0153786 | SAYSD1 |
| 0.018393 | 3.8951637 | -0.9907 | 1.3815423 | ARHGAP27 |
| 0.00398 | 5.2619271 | 1.68279 | 1.5570068 | TRMT2A |
| 0.015606 | 4.0261466 | -0.72876 | 1.2466619 | HOXA1 |
| 0.019652 | 3.8345875 | -1.11196 | 1.1679247 | TUBA4A |
| 0.03755 | 3.3186513 | -2.1423 | 1.4278692 | NAPA |
| 0.002357 | 5.9009278 | 2.85947 | 1.8350247 | TNFAIP1 |
| 0.015344 | 4.0454144 | -0.69027 | 1.4779074 | ATXN2 |
| 0.023961 | 3.6709823 | -1.43951 | 1.1873403 | GNAI2 |
| 0.011996 | 4.2420582 | -0.29838 | 1.3205631 | SLC35A1 |
| 0.011059 | 4.3144732 | -0.15459 | 1.1954288 | ZFP36L1 |
| 0.004786 | 5.0812285 | 1.34002 | 2.1786066 | CR1L |
| 0.003701 | 5.3508803 | 1.84998 | 1.7974201 | TM9SF1 |
| 0.003067 | 5.5771359 | 2.27041 | 1.7735795 | NFATC1 |
| 0.001347 | 6.7816894 | 4.38213 | 3.894997 | FPR2 |
| 0.016151 | 3.9940622 | -0.79288 | 1.1977729 | NCK2 |
| 0.002357 | 5.894388 | 2.84772 | 2.10121 | NDUFAF1 |
| 0.009179 | 4.464955 | 0.14304 | 1.6733172 | MCTP1 |
| 0.036165 | 3.3467863 | -2.08644 | 1.0383066 | MRPS11 |
| 0.011043 | 4.3157809 | -0.152 | 1.1213482 | SWI5 |
| 0.013145 | 4.1675543 | -0.44663 | 1.03596 | ZNF81 |
| 0.031761 | 3.4530752 | -1.87491 | 1.2802898 | FSCN1 |
| 0.011162 | 4.3032742 | -0.17681 | 1.1535391 | CHD9 |
| 0.035839 | 3.3547811 | -2.07056 | 1.3444686 | VENTX |
| 0.008157 | 4.5774777 | 0.36441 | 1.0882433 | ERLIN2 |
| 0.007904 | 4.6063273 | 0.42099 | 1.0302059 | BBS1 |
| 0.007619 | 4.6508315 | 0.50812 | 1.5586146 | CIDEB |
| 0.002948 | 5.6214509 | 2.35192 | 1.6979913 | SLC37A4 |
| 0.046508 | 3.1554507 | -2.46485 | 1.3825878 | TRPM2 |
| 0.006113 | 4.8630464 | 0.92085 | 1.6721114 | KIAA1211L |
| 0.03252 | 3.4319195 | -1.91707 | 1.1649185 | PLIN3 |
| 0.007446 | 4.6745581 | 0.55449 | 1.2187104 | ASCC3 |
| 0.011989 | -4.2429254 | -0.29665 | -2.1924615 | RNF125 |
| 0.00751 | 4.6647414 | 0.53531 | 1.2668744 | MYH9 |
| 0.003751 | 5.338931 | 1.82758 | 1.2561532 | TMEM81 |
| 0.023807 | 3.6773597 | -1.42675 | 1.4770458 | LILRA2 |
| 0.013858 | 4.1243815 | -0.53268 | 1.7215498 | MLYCD |
| 0.004987 | 5.0438248 | 1.26856 | 1.414649 | MRPS31 |
| 0.002352 | 5.9201233 | 2.89391 | 1.6752729 | DUS2L |
| 0.00492 | 5.056906 | 1.29357 | 2.0862748 | HAVCR2 |
| 0.003401 | 5.4624086 | 2.0581 | 1.1765165 | CLUAP1 |
| 0.012018 | 4.2405827 | -0.30131 | 2.2303068 | OGDH |
| 0.006037 | 4.8723938 | 0.93892 | 2.3908465 | TTLL4 |
| 0.027097 | 3.5749695 | -1.63156 | 1.1598659 | TAF5 |
| 0.00408 | 5.23851 | 1.6386 | 1.0675389 | RSPRY1 |
| 0.011836 | 4.2533729 | -0.27589 | 1.5466238 | CSNK1G2 |
| 0.048145 | 3.1291033 | -2.51665 | 1.2270175 | UBASH3A |
| 0.021466 | 3.7669311 | -1.24743 | 1.1639102 | UTP14C |
| 0.022809 | 3.7184952 | -1.3444 | 1.0613492 | FBXL20 |
| 0.005874 | 4.8940462 | 0.98074 | 3.4152681 | CMTM2 |
| 0.003266 | 5.5096332 | 2.14572 | 1.9572486 | IVNS1ABP |
| 0.008912 | 4.4957833 | 0.20379 | 1.3559764 | GLE1 |
| 0.013215 | 4.1620513 | -0.4576 | 1.091622 | ACO2 |
| 0.028919 | 3.5270278 | -1.72735 | 1.2085531 | TPRXL |
| 0.001338 | 6.8646743 | 4.51945 | 2.0189921 | FAM122A |
| 0.009386 | 4.4495606 | 0.11267 | 1.1842319 | POLR1D |
| 0.008559 | 4.5316116 | 0.27431 | 1.683909 | HDAC4 |
| 0.020283 | -3.8085629 | -1.16407 | -1.3207936 | LOC100128242 |
| 0.006969 | 4.732972 | 0.66842 | 1.6056546 | GRK6 |
| 0.032219 | 3.4419689 | -1.89705 | 1.4170496 | LOC100506115 |
| 0.032477 | 3.4356247 | -1.90969 | 1.0694993 | PAQR8 |
| 0.01365 | 4.136806 | -0.5079 | 1.2067195 | TXNDC12 |
| 0.041555 | 3.2343986 | -2.30915 | 1.1626805 | CALHM2 |
| 0.013788 | 4.1281031 | -0.52525 | 1.0437007 | SERPINH1 |
| 0.034191 | 3.3911171 | -1.99831 | 1.0184234 | SLC22A3 |
| 0.011004 | 4.3190144 | -0.14559 | 1.5032671 | ATF1 |
| 0.001148 | 7.8466949 | 6.06421 | 2.2587766 | MRPS14 |
| 0.002931 | 5.6291212 | 2.366 | 1.3003652 | HIST1H4F |
| 0.028811 | 3.5301119 | -1.72119 | 1.0712216 | TMEM132D |
| 0.021975 | 3.7473945 | -1.28654 | 1.8975114 | TNFRSF1B |
| 0.004643 | 5.1128562 | 1.40031 | 1.1628453 | ZNF775 |
| 0.022401 | 3.7334954 | -1.31437 | 1.8366729 | SIGLEC7 |
| 0.008535 | 4.5365977 | 0.28411 | 1.5375863 | PPM1F |
| 0.007078 | 4.7189986 | 0.6412 | 1.1483231 | ZNF224 |
| 0.016162 | 3.9933225 | -0.79436 | 1.1932455 | BTN3A1 |
| 0.016151 | 3.9943296 | -0.79235 | 1.5094429 | ERLIN1 |
| 0.01648 | 3.9773547 | -0.82628 | 1.1407438 | GAPVD1 |
| 0.019652 | -3.8343704 | -1.1124 | -1.2675221 | ZNF256 |
| 0.015367 | 4.0443122 | -0.69247 | 1.337504 | CLDN9 |
| 0.020734 | -3.7908404 | -1.19955 | -1.1141802 | PALD1 |
| 0.000978 | 8.880807 | 7.53687 | 3.5172614 | CCR1 |
| 0.006482 | 4.805953 | 0.81027 | 1.5516567 | C11orf24 |
| 0.012385 | 4.2174567 | -0.3473 | 2.4173292 | OPLAH |
| 0.023252 | 3.7013 | -1.37883 | 1.1044978 | CMAS |
| 0.004156 | 5.2135378 | 1.59141 | 2.5516558 | SAMD9L |
| 0.008942 | 4.4922258 | 0.19679 | 1.8935197 | FHDC1 |
| 0.02673 | 3.5838179 | -1.61387 | 1.1295788 | IKBKE |
| 0.014899 | 4.0656908 | -0.64978 | 1.0370115 | IP6K2 |
| 0.036621 | 3.3373034 | -2.10527 | 1.0610603 | PLK1 |
| 0.012823 | 4.1879707 | -0.40598 | 1.1297477 | USP48 |
| 0.007108 | 4.716399 | 0.63613 | 2.0502618 | INPP4A |
| 0.001222 | 7.041677 | 4.80877 | 1.8078212 | DAXX |
| 0.008244 | 4.5693367 | 0.34843 | 1.948105 | RALB |
| 0.009856 | 4.4089716 | 0.03251 | 1.4359687 | HIST3H2A |
| 0.033514 | 3.4093559 | -1.96201 | 1.1944071 | DSP |
| 0.005757 | 4.9057584 | 1.00334 | 1.5033348 | HDDC3 |
| 0.007666 | 4.6440409 | 0.49483 | 2.1502838 | CLEC4D |
| 0.023419 | 3.6956645 | -1.39011 | 1.2697914 | TAP1 |
| 0.037863 | 3.3126326 | -2.15424 | 1.0363744 | HIST1H2AH |
| 0.004975 | 5.0470058 | 1.27464 | 1.1311823 | ZNF75D |
| 0.023463 | 3.6935962 | -1.39425 | 1.4746078 | SOWAHD |
| 0.02658 | 3.5877634 | -1.60598 | 1.0114469 | YDJC |
| 0.022342 | 3.736749 | -1.30786 | 1.0257396 | NHLRC3 |
| 0.039615 | 3.2748909 | -2.22904 | 1.8559412 | KAZN |
| 0.013197 | 4.1629861 | -0.45573 | 1.4054788 | PPHLN1 |
| 0.035513 | 3.3603339 | -2.05952 | 1.3763263 | UBE2V2 |
| 0.014205 | 4.1059189 | -0.5695 | 1.4340266 | TBC1D1 |
| 0.011657 | 4.2678048 | -0.24722 | 1.2832301 | TMEM173 |
| 0.001222 | 7.2890034 | 5.20497 | 2.8628572 | ACOX1 |
| 0.011627 | 4.2704503 | -0.24196 | 1.279769 | ATP1A3 |
| 0.014849 | 4.0685505 | -0.64407 | 1.3601913 | CLEC16A |
| 0.035777 | 3.3557329 | -2.06867 | 1.2608792 | KIAA0146 |
| 0.011779 | 4.2584808 | -0.26574 | 1.0978083 | ZNF45 |
| 0.017781 | 3.9232058 | -0.93459 | 1.1926697 | SYNM |
| 0.014438 | 4.0918401 | -0.59759 | 2.8265519 | GPR97 |
| 0.024005 | 3.6687911 | -1.4439 | 1.247723 | SORT1 |
| 0.007494 | 4.6662436 | 0.53824 | 1.6852221 | VASP |
| 0.002357 | 5.8941803 | 2.84735 | 2.0967146 | RTN3 |
| 0.028757 | 3.5323279 | -1.71677 | 1.0290586 | PSRC1 |
| 0.001691 | 6.3166398 | 3.59294 | 2.7232063 | RHOB |
| 0.0433 | 3.2040144 | -2.36915 | 1.1060867 | MAPK1IP1L |
| 0.022712 | 3.7220105 | -1.33737 | 1.1370291 | MRFAP1 |
| 0.036175 | 3.3465321 | -2.08694 | 1.1099861 | LY6G6F |
| 0.004 | 5.2576797 | 1.67478 | 1.6588325 | MGLL |
| 0.001854 | 6.2338456 | 3.44895 | 1.7843888 | DCAF7 |
| 0.0047 | 5.0972073 | 1.37049 | 1.5381507 | SZT2 |
| 0.018363 | 3.8965764 | -0.98788 | 1.2409109 | ZNF701 |
| 0.033458 | 3.4108538 | -1.95903 | 1.3857152 | SHISA5 |
| 0.016587 | 3.9733385 | -0.83431 | 1.2705216 | MKL1 |
| 0.006502 | 4.802947 | 0.80444 | 1.6850398 | MIRLET7BHG |
| 0.009359 | 4.4512871 | 0.11607 | 1.2128017 | PSMB2 |
| 0.002695 | 5.7255299 | 2.54226 | 1.6208551 | CFDP1 |
| 0.011369 | 4.2882449 | -0.20663 | 1.3255113 | GOLGA4 |
| 0.021491 | 3.7652252 | -1.25084 | 1.2436705 | CHCHD7 |
| 0.006114 | 4.86141 | 0.91769 | 2.068481 | ECHDC1 |
| 0.014673 | 4.0784077 | -0.62439 | 1.2974548 | PWWP2A |
| 0.008244 | 4.5685955 | 0.34698 | 1.4565753 | NCBP1 |
| 0.006759 | 4.7643877 | 0.72955 | 1.2109125 | GANC |
| 0.026444 | 3.5927102 | -1.59609 | 1.0465546 | KCTD21 |
| 0.010251 | 4.3795099 | -0.02576 | 1.3961792 | NCKAP1L |
| 0.00448 | 5.141696 | 1.45518 | 1.8067698 | LAGE3 |
| 0.007412 | 4.6798542 | 0.56483 | 1.8697304 | RINL |
| 0.001553 | 6.4146927 | 3.76211 | 1.9789366 | TPM4 |
| 0.013362 | 4.1551572 | -0.47133 | 1.0850897 | PPP6R2 |
| 0.021625 | 3.7592849 | -1.26274 | 1.2758595 | UNC93B1 |
| 0.027667 | 3.5589338 | -1.66361 | 1.1189286 | RAP1GAP2 |
| 0.037875 | 3.3120455 | -2.1554 | 1.3275224 | OSBP2 |
| 0.042127 | -3.2233666 | -2.33095 | -1.2482653 | GFOD1 |
| 0.037872 | 3.3123995 | -2.1547 | 2.0873565 | FLJ27255 |
| 0.01941 | 3.8465915 | -1.08793 | 1.0498233 | FUT11 |
| 0.00398 | 5.2618292 | 1.68261 | 1.5052717 | TRNT1 |
| 0.003593 | 5.3801692 | 1.9048 | 1.4688616 | ENSA |
| 0.006226 | 4.8438933 | 0.8838 | 2.0451732 | GBA |
| 0.01863 | 3.8830226 | -1.015 | 1.2716165 | ZNF19 |
| 0.02311 | 3.7086006 | -1.36421 | 1.2563533 | KIF2A |
| 0.027644 | 3.5596246 | -1.66223 | 1.7049042 | ANKRD34B |
| 0.008845 | 4.5031271 | 0.21826 | 1.3267796 | HAX1 |
| 0.002357 | 5.9002734 | 2.85829 | 1.8422501 | CEACAM21 |
| 0.018468 | 3.8912622 | -0.99851 | 1.1958664 | HIST1H2BG |
| 0.019314 | 3.8497772 | -1.08155 | 1.2386179 | PCYT2 |
| 0.001355 | 6.7395301 | 4.31196 | 1.7276321 | B3GALT4 |
| 0.008131 | 4.5816613 | 0.37262 | 1.0782668 | RPA4 |
| 0.008206 | 4.5739553 | 0.3575 | 1.5195417 | RNF40 |
| 0.034381 | 3.3867058 | -2.00708 | 1.1204988 | MTMR3 |
| 0.023843 | 3.6764656 | -1.42854 | 1.3069864 | PLEKHG7 |
| 0.027538 | 3.56265 | -1.65618 | 1.0548623 | ZCCHC7 |
| 0.005985 | 4.8783607 | 0.95045 | 1.4759021 | OAZ1 |
| 0.009538 | 4.434723 | 0.08338 | 1.4392066 | CHTF8 |
| 0.03882 | 3.2909899 | -2.19715 | 1.2874603 | DYNLL1 |
| 0.013179 | 4.1649167 | -0.45189 | 1.3777555 | EIF6 |
| 0.023438 | 3.6946446 | -1.39215 | 1.0491831 | UQCR11 |
| 0.009631 | 4.4261786 | 0.06651 | 1.4363158 | POLR2G |
| 0.04317 | 3.206042 | -2.36515 | 1.0176144 | COX17 |
| 0.012823 | 4.1877703 | -0.40638 | 1.2559313 | KLC1 |
| 0.00391 | 5.2913411 | 1.73819 | 1.9468385 | SAT1 |
| 0.003493 | 5.4189419 | 1.97719 | 1.5475409 | PURA |
| 0.049608 | 3.1076193 | -2.55883 | 1.0377528 | HSPBAP1 |
| 0.038588 | 3.2956348 | -2.18794 | 1.0960409 | FAM49B |
| 0.017976 | 3.9139435 | -0.95312 | 1.1693295 | ORAI1 |
| 0.005154 | 5.008501 | 1.20092 | 1.1453295 | FBXO42 |
| 0.023734 | 3.6808802 | -1.4197 | 1.0912613 | ANKIB1 |
| 0.003402 | 5.4571933 | 2.04841 | 1.7075634 | CDK4 |
| 0.008845 | 4.503046 | 0.2181 | 1.6679787 | ASXL2 |
| 0.011162 | 4.3034175 | -0.17652 | 1.2087663 | NCKIPSD |
| 0.002863 | 5.6667984 | 2.43504 | 1.5131881 | LOC401397 |
| 0.042367 | -3.2191226 | -2.33933 | -1.2275829 | SNTN |
| 0.001695 | 6.3120641 | 3.58501 | 1.7590704 | TANGO2 |
| 0.030189 | -3.4927595 | -1.79576 | -1.4488699 | ZNF507 |
| 0.008331 | 4.5570889 | 0.32438 | 1.4299395 | PDPK1 |
| 0.011842 | 4.2522685 | -0.27808 | 1.2852945 | MRPS34 |
| 0.03491 | 3.3745945 | -2.03117 | 1.4611461 | SCIMP |
| 0.002816 | 5.6893977 | 2.47636 | 1.8554411 | DNAJC5 |
| 0.001148 | 7.6519614 | 5.76951 | 1.9131164 | RBM12 |
| 0.001554 | 6.4090689 | 3.75245 | 1.6208246 | ZNF17 |
| 0.01555 | 4.0308254 | -0.71941 | 1.3657006 | NARG2 |
| 0.038353 | 3.3011883 | -2.17693 | 1.3593204 | FAM201A |
| 0.011526 | 4.2774805 | -0.228 | 1.306518 | NRGN |
| 0.003955 | 5.2785789 | 1.71417 | 1.3786682 | HMOX2 |
| 0.03252 | 3.4322571 | -1.9164 | 1.0345463 | NMRAL1 |
| 0.013716 | 4.1327264 | -0.51604 | 1.811311 | KIAA0930 |
| 0.010094 | 4.3888689 | -0.00724 | 1.1643301 | AKT2 |
| 0.010011 | 4.3945403 | 0.00398 | 1.3198486 | TRMT112 |
| 0.044922 | 3.1786577 | -2.41915 | 1.0646428 | MINOS1 |
| 0.000978 | 8.1042229 | 6.44532 | 2.2329066 | MSL1 |
| 0.009538 | 4.436357 | 0.08661 | 1.1388894 | C11orf30 |
| 0.019342 | 3.8488771 | -1.08335 | 1.6349864 | GTF2H5 |
| 0.027538 | 3.5626036 | -1.65628 | 1.2167957 | TOM1L2 |
| 0.002578 | 5.7730035 | 2.62856 | 2.0166205 | CDC26 |
| 0.018171 | 3.9051722 | -0.97068 | 1.3069626 | LAMTOR4 |
| 0.010358 | 4.370516 | -0.04355 | 2.3252193 | AP5Z1 |
| 0.027538 | 3.5624648 | -1.65655 | 1.3025341 | PIGF |
| 0.045233 | 3.1738673 | -2.42859 | 1.2028068 | RTEL1 |
| 0.02403 | 3.6678027 | -1.44587 | 1.2008067 | SCYL3 |
| 0.019997 | 3.8201699 | -1.14083 | 1.838464 | STAT6 |
| 0.009015 | 4.479769 | 0.17224 | 1.3171352 | SPECC1 |
| 0.003401 | 5.4694372 | 2.07116 | 1.6714524 | EXOC3 |
| 0.003424 | 5.4478516 | 2.03103 | 1.9833903 | ASAP1 |
| 0.017781 | 3.9219286 | -0.93715 | 1.2148185 | SNX1 |
| 0.003044 | 5.5839081 | 2.28288 | 2.4597792 | STX6 |
| 0.009538 | 4.4367198 | 0.08732 | 2.0788765 | CETN3 |
| 0.015764 | 4.0154411 | -0.75015 | 1.1425005 | TMEM110 |
| 0.005926 | 4.8870254 | 0.96719 | 1.4518284 | TMEM223 |
| 0.03808 | 3.3081351 | -2.16316 | 1.1993772 | RGP1 |
| 0.001438 | 6.5520384 | 3.99658 | 1.8623624 | SNAI3-AS1 |
| 0.046351 | 3.1573838 | -2.46104 | 1.0558633 | GDF11 |
| 0.011481 | 4.2808151 | -0.22138 | 1.3993299 | C1orf86 |
| 0.015753 | 4.0171275 | -0.74678 | 1.571768 | GRSF1 |
| 0.025932 | 3.6084968 | -1.56453 | 1.4015072 | ANP32AP1 |
| 0.002103 | 6.0869546 | 3.19091 | 2.066887 | SNX8 |
| 0.01052 | 4.3557007 | -0.07289 | 1.135316 | CREB1 |
| 0.036305 | 3.3436422 | -2.09268 | 1.0831944 | TMEM248 |
| 0.012565 | 4.2041105 | -0.37385 | 1.2111491 | SMIM15 |
| 0.006804 | 4.7567835 | 0.71476 | 1.3772832 | PNPLA8 |
| 0.027308 | 3.5696623 | -1.64217 | 1.2298212 | ZFP90 |
| 0.04114 | 3.2436088 | -2.29094 | 1.3589823 | TARP |
| 0.017783 | 3.9210485 | -0.93891 | 1.0138154 | BLOC1S3 |
| 0.009597 | 4.4293194 | 0.07271 | 1.4471781 | BCAP31 |
| 0.003401 | 5.4682562 | 2.06897 | 1.4625954 | MIA3 |
| 0.014567 | 4.0835067 | -0.61422 | 1.5345888 | LOC283788 |
| 0.042603 | -3.2151989 | -2.34708 | -1.0738505 | KRTAP2-1 |
| 0.003592 | 5.3820104 | 1.90824 | 1.8609397 | SRA1 |
| 0.005559 | 4.9485412 | 1.08576 | 2.948878 | C9orf69 |
| 0.025899 | 3.6092648 | -1.56299 | 1.2212694 | GPD2 |
| 0.001509 | 6.4470218 | 3.81756 | 2.5440486 | CEP63 |
| 0.009123 | -4.4702787 | 0.15353 | -1.3375346 | RPL27A |
| 0.002044 | 6.1277655 | 3.26293 | 2.2361755 | C16orf52 |
| 0.006804 | 4.7564147 | 0.71405 | 1.3969147 | HNRNPA3 |
| 0.029636 | 3.5091939 | -1.76296 | 1.4059506 | HNRNPA2B1 |
| 0.004279 | 5.1832727 | 1.5341 | 2.2624766 | STX7 |
| 0.040848 | 3.2508547 | -2.27661 | 1.4587459 | MALAT1 |
| 0.001854 | 6.2340342 | 3.44928 | 1.8636292 | UNKL |
| 0.004658 | 5.1074085 | 1.38993 | 1.5296372 | MGAT4A |
| 0.030226 | 3.4913958 | -1.79848 | 1.5807771 | RAB6B |
| 0.03882 | 3.2909894 | -2.19715 | 1.0107907 | KIF27 |
| 0.020126 | 3.8147161 | -1.15175 | 1.1236946 | MEF2BNB |
| 0.014344 | 4.0962287 | -0.58883 | 2.1898563 | GK3P |
| 0.008244 | 4.5679282 | 0.34567 | 1.1016425 | POLR3G |
| 0.018625 | 3.8835785 | -1.01389 | 1.283384 | DTX4 |
| 0.007218 | 4.7036738 | 0.61132 | 1.7415028 | LCN10 |
| 0.01039 | 4.3667068 | -0.05109 | 1.2992611 | SNTB2 |
| 0.032512 | 3.4344157 | -1.9121 | 1.2300975 | PRR14L |
| 0.031151 | 3.4669113 | -1.84733 | 1.1816401 | TRIM25 |
| 0.033958 | 3.3986202 | -1.98338 | 1.7100847 | ABHD2 |
| 0.007494 | 4.6665401 | 0.53882 | 2.0898668 | AMDHD2 |
| 0.009537 | 4.4393495 | 0.09251 | 1.3315282 | EIF2C4 |
| 0.001148 | 7.6227357 | 5.72479 | 2.7122559 | COA3 |
| 0.024678 | 3.6472174 | -1.48707 | 1.1030238 | GIMAP6 |
| 0.006598 | 4.7887613 | 0.77691 | 1.306549 | LOC100129034 |
| 0.029615 | 3.5099834 | -1.76138 | 2.069523 | KDM6B |
| 0.039265 | 3.2821048 | -2.21475 | 1.2185573 | MRPS7 |
| 0.044233 | 3.1883732 | -2.4 | 1.0265076 | TFDP3 |
| 0.009597 | 4.4292407 | 0.07255 | 1.7268466 | NUP98 |
| 0.002056 | 6.1158988 | 3.24202 | 1.8168955 | BICD2 |
| 0.03252 | 3.43243 | -1.91606 | 1.0440999 | PRDX3 |
| 0.009547 | 4.4337788 | 0.08152 | 1.264946 | RNF41 |
| 0.035216 | 3.3660112 | -2.04824 | 1.0051733 | MXD3 |
| 0.037183 | 3.3265339 | -2.12665 | 1.2747954 | ZNF33A |
| 0.001438 | 6.5519757 | 3.99648 | 2.3376348 | PYGL |
| 0.008688 | 4.5179904 | 0.24751 | 1.664828 | LYST |
| 0.031299 | 3.463295 | -1.85454 | 1.2336576 | MYH11 |
| 0.00663 | 4.7859095 | 0.77137 | 1.5014945 | EPB41 |
| 0.001459 | 6.500583 | 3.90908 | 2.0991129 | ENTPD1 |
| 0.007373 | 4.6850447 | 0.57497 | 1.3053103 | MBNL1 |
| 0.003839 | 5.312034 | 1.7771 | 2.5725633 | HK2 |
| 0.035066 | 3.3699301 | -2.04045 | 1.125021 | MAF1 |
| 0.021051 | 3.7807166 | -1.21982 | 1.0761431 | VEZF1 |
| 0.015764 | 4.0151971 | -0.75064 | 1.2800528 | TUBB4B |
| 0.026592 | 3.5872357 | -1.60704 | 1.2685921 | KIF1C |
| 0.008153 | -4.5784084 | 0.36624 | -1.1439949 | TPRX1 |
| 0.004084 | 5.2364246 | 1.63467 | 1.675769 | ZBTB3 |
| 0.009538 | 4.4358906 | 0.08569 | 1.6228969 | CYP4F3 |
| 0.034118 | 3.3934355 | -1.9937 | 1.0368897 | ZNF770 |
| 0.046338 | 3.1582124 | -2.45941 | 1.0320995 | TRIP4 |
| 0.023252 | 3.7017699 | -1.37789 | 1.5001243 | NFE2L3 |
| 0.002083 | 6.1048292 | 3.22249 | 2.5527581 | VMP1 |
| 0.025667 | 3.6157156 | -1.55009 | 1.0607182 | ACAP1 |
| 0.015835 | 4.0109704 | -0.75909 | 1.0182421 | OSGEP |
| 0.006637 | 4.7814597 | 0.76273 | 1.3258868 | GSKIP |
| 0.04113 | 3.2444413 | -2.2893 | 1.2559511 | SEC14L5 |
| 0.007041 | 4.7237909 | 0.65054 | 1.134347 | ZNF500 |
| 0.029264 | 3.5183772 | -1.74463 | 1.0492884 | PTOV1 |
| 0.048707 | 3.1209022 | -2.53276 | 1.3374874 | CCDC61 |
| 0.042031 | 3.2255201 | -2.32669 | 1.112255 | RAB3A |
| 0.012831 | 4.1867133 | -0.40848 | 1.5759933 | DBX1 |
| 0.001856 | 6.2282147 | 3.43912 | 1.9065383 | ATP6V0E1 |
| 0.008706 | 4.5151587 | 0.24194 | 1.2393588 | ZBTB45 |
| 0.007295 | 4.6925738 | 0.58966 | 1.0356195 | EIF2S2 |
| 0.00853 | 4.5372183 | 0.28533 | 2.5083542 | FFAR2 |
| 0.004474 | 5.1446043 | 1.46071 | 2.4250581 | PLEKHG3 |
| 0.014811 | 4.070482 | -0.64022 | 1.4831782 | TIMM10 |
| 0.008456 | 4.5467678 | 0.3041 | 1.428438 | GMPR |
| 0.001222 | 7.10916 | 4.91781 | 1.9592504 | BATF |
| 0.003148 | 5.5447591 | 2.21068 | 2.0230534 | MED11 |
| 0.003401 | 5.4657238 | 2.06426 | 1.5638725 | FAM103A1 |
| 0.026881 | -3.5795553 | -1.62239 | -1.0146783 | OR7G2 |
| 0.01772 | -3.9257359 | -0.92953 | -1.0385146 | OR1N2 |
| 0.047035 | 3.1468884 | -2.48169 | 1.1821528 | FAM174A |
| 0.009491 | 4.4420621 | 0.09787 | 1.502931 | B3GNTL1 |
| 0.019544 | -3.8413223 | -1.09848 | -1.062247 | OR4D11 |
| 0.012586 | -4.2030068 | -0.37605 | -1.3142639 | OR5AK2 |
| 0.004144 | 5.2178939 | 1.59965 | 1.8025564 | C16orf72 |
| 0.017781 | 3.9216295 | -0.93774 | 1.3172697 | APOBR |
| 0.023005 | 3.7119964 | -1.35741 | 1.3306157 | TMEM179B |
| 0.013197 | 4.1634003 | -0.45491 | 1.1674655 | SNAI3 |
| 0.005674 | 4.9244284 | 1.03933 | 1.2647495 | ANKRD46 |
| 0.038261 | 3.3046906 | -2.16999 | 1.1314765 | C16orf93 |
| 0.006811 | -4.755092 | 0.71147 | -1.0833292 | SPINK14 |
| 0.019924 | -3.823354 | -1.13445 | -1.2921616 | OR5D13 |
| 0.013144 | 4.169135 | -0.44348 | 1.045927 | SDHAF1 |
| 0.003855 | 5.3021021 | 1.75843 | 1.3243085 | ARRDC5 |
| 0.035066 | 3.3701013 | -2.04011 | 1.3925523 | SPINK8 |
| 0.01305 | -4.174484 | -0.43283 | -1.0771604 | CLRN1-AS1 |
| 0.004005 | 5.2553476 | 1.67038 | 2.6508719 | ASPRV1 |
| 0.001345 | 6.8220995 | 4.44913 | 2.343679 | MOB1A |
| 0.023227 | 3.7035215 | -1.37438 | 1.861579 | CCDC164 |
| 0.004133 | 5.2258969 | 1.61478 | 2.1435066 | IL10RB |
| 0.000978 | 8.0484216 | 6.36357 | 2.2748187 | FAM69A |
| 0.008557 | 4.5343827 | 0.27976 | 1.4617199 | SERF2 |
| 0.001222 | 7.2065348 | 5.07391 | 3.4763314 | BASP1 |
| 0.010914 | 4.326092 | -0.13155 | 1.6277778 | ESRRA |
| 0.01412 | 4.1118048 | -0.55776 | 1.8125255 | IDH1 |
| 0.030847 | 3.4754914 | -1.83021 | 1.2195604 | KLF7 |
| 0.022129 | 3.7429589 | -1.29542 | 1.6726596 | NMNAT1 |
| 0.013716 | 4.1329386 | -0.51561 | 1.4192829 | GNB2 |
| 0.015372 | 4.0434876 | -0.69412 | 1.3270095 | NCAPD2 |
| 0.03406 | 3.3956401 | -1.98931 | 1.1595398 | TXNRD2 |
| 0.003647 | 5.3612424 | 1.86939 | 1.7958032 | AVL9 |
| 0.00492 | 5.0572443 | 1.29422 | 2.3997649 | NAMPT |
| 0.011627 | 4.2701315 | -0.2426 | 1.1327773 | GSTO1 |
| 0.007295 | 4.6924724 | 0.58947 | 1.3129332 | EPG5 |
| 0.005066 | 5.028779 | 1.23976 | 1.1898702 | ARSK |
| 0.023001 | 3.712432 | -1.35654 | 1.0410279 | ZNF444 |
| 0.004535 | 5.1334824 | 1.43956 | 1.7899727 | MED16 |
| 0.015815 | -4.0120364 | -0.75696 | -1.0643871 | ACBD7 |
| 0.012275 | 4.2236303 | -0.33502 | 1.5243456 | TNRC18 |
| 0.04085 | 3.2507151 | -2.27689 | 1.1438802 | IFITM2 |
| 0.002352 | 5.9240603 | 2.90096 | 1.8423381 | PISD |
| 0.030256 | 3.4899826 | -1.8013 | 1.1655332 | ARHGDIG |
| 0.015267 | 4.0507989 | -0.67952 | 1.3812011 | ACAA1 |
| 0.043117 | 3.2067457 | -2.36376 | 1.3083314 | SIRPB1 |
| 0.007851 | 4.6191418 | 0.44609 | 3.0758065 | BMX |
| 0.001345 | 6.8188864 | 4.44381 | 1.9351871 | NFE2L2 |
| 0.004933 | 5.0539809 | 1.28798 | 2.0145494 | PHTF1 |
| 0.006303 | 4.8323412 | 0.86143 | 1.9090728 | PRDX1 |
| 0.002352 | 5.9241869 | 2.90119 | 1.9724547 | SERINC3 |
| 0.010928 | 4.3242198 | -0.13527 | 1.639535 | ANP32A |
| 0.013414 | 4.1514357 | -0.47875 | 1.6285685 | ARFIP1 |
| 0.002354 | 5.9086662 | 2.87336 | 1.6122702 | CES2 |
| 0.029205 | 3.5198059 | -1.74177 | 1.3117324 | PELI3 |
| 0.030043 | 3.4974837 | -1.78633 | 1.2947765 | ZKSCAN7 |
| 0.007047 | 4.7224744 | 0.64797 | 1.683028 | CPNE1 |
| 0.028216 | 3.5452172 | -1.69102 | 1.2204915 | PQLC2 |
| 0.010914 | 4.32664 | -0.13047 | 1.1177403 | PSMA4 |
| 0.026516 | 3.5895495 | -1.60241 | 1.1757538 | HDAC7 |
| 0.024053 | 3.6670135 | -1.44745 | 1.1192899 | PKM |
| 0.030741 | 3.4783077 | -1.8246 | 1.1215725 | FCGR2B |
| 0.010529 | 4.3549258 | -0.07442 | 1.3656907 | CDC14B |
| 0.034778 | 3.3772635 | -2.02587 | 1.063468 | DHPS |
| 0.025417 | 3.6224444 | -1.53663 | 1.1571869 | CENPM |
| 0.005172 | 5.0033818 | 1.1911 | 1.3150147 | DDX17 |
| 0.002948 | 5.6197879 | 2.34887 | 1.7043837 | UBE2W |
| 0.002948 | 5.6103854 | 2.33159 | 2.030113 | IL4I1 |
| 0.039183 | 3.2833503 | -2.21228 | 1.2153669 | IMPDH1 |
| 0.02311 | 3.7080722 | -1.36527 | 1.1851567 | ENO3 |
| 0.020585 | 3.7965383 | -1.18814 | 1.0973097 | CASP8AP2 |
| 0.010005 | 4.396497 | 0.00785 | 1.3344279 | PILRB |
| 0.011136 | 4.3072747 | -0.16887 | 1.3541194 | ATXN1 |
| 0.025259 | 3.6271588 | -1.5272 | 1.0459303 | STRADA |
| 0.012446 | 4.2111756 | -0.35979 | 2.0919644 | TNNI2 |
| 0.007666 | 4.6441931 | 0.49513 | 1.4933031 | CAP1 |
| 0.008949 | 4.489207 | 0.19084 | 1.2972705 | PTPRA |
| 0.0213 | 3.7730298 | -1.23522 | 1.0479385 | ZNF767 |
| 0.036424 | 3.34108 | -2.09777 | 1.1943589 | SDCBP |
| 0.035271 | 3.3642546 | -2.05173 | 1.1690419 | G3BP1 |
| 0.004368 | 5.1682479 | 1.5056 | 1.3155125 | HERC4 |
| 0.020396 | 3.8045544 | -1.17209 | 1.3327989 | TAGLN |
| 0.0028 | 5.6941512 | 2.48504 | 1.8734076 | NUDT22 |
| 0.010812 | 4.3358542 | -0.1122 | 1.3974644 | RBMS1 |
| 0.009021 | 4.4782282 | 0.16921 | 1.3335174 | TMEM251 |
| 0.026011 | 3.605756 | -1.57001 | 1.0418162 | CMIP |
| 0.012476 | 4.2097324 | -0.36266 | 1.1697064 | VPS37A |
| 0.014345 | 4.0956856 | -0.58991 | 1.080078 | RAB28 |
| 0.001991 | 6.1643644 | 3.3273 | 1.801141 | SON |
| 0.024483 | 3.653209 | -1.47508 | 1.1842515 | FLYWCH2 |
| 0.019648 | 3.8362053 | -1.10872 | 1.1050283 | CDCA7L |
| 0.018307 | 3.8992997 | -0.98243 | 1.4640592 | CMTM5 |
| 0.011153 | 4.3049663 | -0.17345 | 1.5876686 | WBP1L |
| 0.001222 | 7.167459 | 5.01144 | 2.2034587 | ILK |
| 0.040284 | 3.260702 | -2.25713 | 1.5391836 | TMEM88 |
| 0.024491 | 3.6528313 | -1.47583 | 1.8378783 | FTH1 |
| 0.005564 | 4.945257 | 1.07944 | 1.6381476 | COMMD5 |
| 0.028755 | 3.5325092 | -1.7164 | 1.6640912 | ARMC10 |
| 0.021085 | 3.7795819 | -1.2221 | 1.4142644 | HPSE |
| 0.006583 | 4.7918806 | 0.78297 | 1.5400784 | MTX1 |
| 0.018023 | 3.9122808 | -0.95645 | 1.3387946 | TRAPPC5 |
| 0.016669 | 3.9698879 | -0.84121 | 1.1401677 | CD47 |
| 0.044117 | 3.1907552 | -2.39531 | 1.0197587 | SVIL |
| 0.003733 | 5.3456496 | 1.84018 | 3.1342871 | GK |
| 0.012385 | 4.2164046 | -0.34939 | 1.0805334 | GPX1 |
| 0.04243 | 3.2181769 | -2.3412 | 1.1755973 | LOC729040 |
| 0.0248 | 3.6417484 | -1.49801 | 1.2414827 | FAM133B |
| 0.001369 | 6.6911653 | 4.23113 | 2.5949732 | GDPD3 |
| 0.014274 | 4.101059 | -0.57919 | 1.4322053 | TMEM234 |
| 0.009826 | 4.4118877 | 0.03827 | 1.3305663 | PIGO |
| 0.002448 | 5.8446991 | 2.75827 | 1.4388832 | CDPF1 |
| 0.023709 | 3.6818987 | -1.41766 | 1.386617 | MYL4 |
| 0.003493 | 5.419157 | 1.97759 | 1.7561418 | PPP1R21 |
| 0.020404 | 3.8041817 | -1.17284 | 1.4098037 | RNF185 |
| 0.002868 | 5.664404 | 2.43066 | 2.3658412 | NAGK |
| 0.046865 | 3.1500079 | -2.47556 | 1.1460417 | SNAPC3 |
| 0.021479 | 3.7658746 | -1.24954 | 1.294036 | AMPD2 |
| 0.035268 | 3.3644285 | -2.05138 | 1.4891806 | TMEM205 |
| 0.038403 | -3.2989433 | -2.18138 | -1.2307958 | AAED1 |
| 0.005704 | 4.920235 | 1.03125 | 1.3049847 | RRP1 |
| 0.047583 | 3.1382295 | -2.49872 | 1.0054371 | VMAC |
| 0.012607 | 4.2016573 | -0.37873 | 1.4885063 | FAM135A |
| 0.023734 | 3.680867 | -1.41973 | 1.04463 | SF1 |
| 0.018946 | 3.8692415 | -1.04259 | 1.0830147 | CASS4 |
| 0.001553 | 6.4127616 | 3.75879 | 1.5310079 | GLS |
| 0.040587 | 3.2553778 | -2.26766 | 1.0481402 | PTPLB |
| 0.034238 | 3.3895562 | -2.00141 | 1.0449769 | TEX264 |
| 0.024707 | 3.6463142 | -1.48887 | 1.3233671 | TMEM229B |
| 0.020619 | 3.7950119 | -1.1912 | 1.073631 | KIAA0319L |
| 0.026432 | 3.5932973 | -1.59492 | 1.1005349 | FLCN |
| 0.005218 | 4.9947419 | 1.17453 | 1.2666803 | ING4 |
| 0.041104 | 3.2456773 | -2.28685 | 1.0382154 | PLAGL1 |
| 0.012185 | 4.2311245 | -0.32011 | 1.2507712 | LEPRE1 |
| 0.025398 | 3.6231184 | -1.53528 | 1.0663808 | PPAPDC1B |
| 0.004975 | 5.0459369 | 1.2726 | 1.3572289 | PDLIM5 |
| 0.001435 | 6.5917722 | 4.06387 | 1.7311355 | VPS13B |
| 0.026765 | 3.5828875 | -1.61573 | 1.5046456 | ERGIC1 |
| 0.002448 | 5.8347915 | 2.74039 | 1.9446323 | LITAF |
| 0.001727 | 6.2927135 | 3.55144 | 1.9196511 | NBR1 |
| 0.02282 | 3.7174511 | -1.34649 | 1.4036081 | TAOK1 |
| 0.004268 | 5.1871142 | 1.54138 | 2.6644478 | PANX2 |
| 0.015606 | 4.0262131 | -0.72863 | 1.5291692 | CAMK1D |
| 0.018108 | 3.9083108 | -0.96439 | 1.241282 | CD200R1 |
| 0.012831 | 4.1865328 | -0.40884 | 1.8313978 | ZNF438 |
| 0.022129 | 3.7432639 | -1.29481 | 1.2434268 | TPM1 |
| 0.003168 | 5.5378812 | 2.19797 | 2.0516337 | ALDH4A1 |
| 0.027533 | 3.5632914 | -1.6549 | 1.6326249 | SYK |
| 0.023892 | 3.6739513 | -1.43357 | 1.1398552 | DPM3 |
| 0.005589 | 4.9402917 | 1.06989 | 2.1641575 | WLS |
| 0.003834 | 5.316246 | 1.78501 | 1.6352564 | SPTB |
| 0.001447 | 6.521662 | 3.94498 | 1.8284552 | ICAM2 |
| 0.014567 | 4.0833708 | -0.61449 | 1.4189946 | BRD8 |
| 0.026383 | 3.5951355 | -1.59124 | 1.1442324 | ADAMTS13 |
| 0.019766 | 3.8294328 | -1.12228 | 1.1533028 | MAPRE2 |
| 0.002192 | 6.0304582 | 3.0908 | 1.9453163 | MBP |
| 0.010587 | 4.3513605 | -0.08148 | 1.4800629 | PTRH1 |
| 0.015555 | 4.0302096 | -0.72064 | 1.158155 | SLC35F6 |
| 0.005407 | 4.9649137 | 1.11725 | 1.8588993 | N4BP2L2 |
| 0.003943 | 5.2838332 | 1.72406 | 1.6817511 | ADAT3 |
| 0.015555 | 4.0303836 | -0.7203 | 1.2468351 | NOTCH2NL |
| 0.007295 | 4.6939888 | 0.59242 | 1.2442898 | UBE2J1 |
| 0.010444 | 4.3624415 | -0.05954 | 1.1447047 | C7orf55 |
| 0.001222 | 7.1596072 | 4.99886 | 1.9965127 | MRPS6 |
| 0.00399 | 5.2597109 | 1.67861 | 1.5611648 | GATSL3 |
| 0.004651 | 5.1103822 | 1.3956 | 1.8545667 | ARL2 |
| 0.012192 | -4.230126 | -0.3221 | -1.8287948 | LHFPL3 |
| 0.023634 | 3.6839858 | -1.41348 | 1.1598849 | LCN6 |
| 0.004127 | 5.2274632 | 1.61774 | 1.6963878 | ZNF322 |
| 0.009995 | -4.3982228 | 0.01126 | -1.3531785 | FAM155A |
| 0.001222 | 7.1085896 | 4.91689 | 3.6317143 | HSPA1A |
| 0.010903 | 4.3277766 | -0.12822 | 1.7251435 | IFI35 |
| 0.010251 | 4.379295 | -0.02618 | 1.0898941 | DYNLRB1 |
| 0.040893 | 3.2500818 | -2.27814 | 1.0099371 | LINC00623 |
| 0.02998 | 3.4993784 | -1.78255 | 1.2129825 | CXorf40B |
| 0.003205 | 5.525644 | 2.17535 | 2.0821937 | AK2 |
| 0.04897 | 3.1166446 | -2.54112 | 1.6013497 | PLAUR |
| 0.019652 | -3.8345386 | -1.11206 | -1.0304666 | FBLN1 |
| 0.020488 | 3.7999656 | -1.18128 | 1.3371545 | ZAK |
| 0.045619 | 3.168648 | -2.43887 | 1.1080094 | PHF14 |
| 0.004538 | 5.1324728 | 1.43764 | 2.4336531 | OAS2 |
| 0.002448 | 5.837615 | 2.74549 | 1.8860922 | BRD4 |
| 0.020256 | -3.8100167 | -1.16116 | -1.0251262 | KLK3 |
| 0.012192 | 4.2300696 | -0.32221 | 1.6660271 | SYN2 |
| 0.026181 | 3.6007089 | -1.5801 | 1.5294745 | WDR4 |
| 0.03487 | 3.3755444 | -2.02928 | 1.648738 | DISC1 |
| 0.022475 | 3.7311934 | -1.31898 | 1.1419418 | ZNF197 |
| 0.046588 | -3.1541527 | -2.4674 | -1.4103345 | MVB12B |
| 0.010239 | 4.3812697 | -0.02227 | 1.5914075 | PDLIM2 |
| 0.015286 | 4.0494696 | -0.68217 | 1.2205211 | TIA1 |
| 0.027104 | 3.5745063 | -1.63249 | 1.007815 | STK19 |
| 0.032677 | 3.429052 | -1.92279 | 1.496805 | KDELR2 |
| 0.042017 | 3.2262717 | -2.32521 | 1.1831256 | TP53TG3C |
| 0.005016 | 5.0368823 | 1.25528 | 1.5749399 | ST20 |
| 0.023503 | -3.6900094 | -1.40143 | -1.455291 | GPX5 |
| 0.040133 | 3.2654745 | -2.24768 | 1.1146366 | ZNF155 |
| 0.033997 | 3.397678 | -1.98525 | 1.3240068 | DHRS4-AS1 |
| 0.014477 | 4.0895526 | -0.60215 | 1.335485 | EWSR1 |
| 0.014313 | 4.0987669 | -0.58377 | 1.3376187 | AGER |
| 0.016824 | 3.9641044 | -0.85278 | 1.1744629 | PRR13 |
| 0.017472 | 3.9350698 | -0.91085 | 1.3848296 | C2orf74 |
| 0.030415 | 3.4855383 | -1.81017 | 1.4094737 | ANG |
| 0.01531 | 4.0468222 | -0.68746 | 1.0037421 | TMEM189 |
| 0.002665 | 5.7371451 | 2.5634 | 2.4412921 | ZMYM6NB |
| 0.003855 | 5.3017739 | 1.75781 | 1.5567419 | LOC100132707 |
| 0.049602 | 3.1078489 | -2.55838 | 1.0565953 | HLA-F |
| 0.041682 | 3.2320283 | -2.31383 | 1.1825912 | ZNF674 |
| 0.033932 | 3.3992648 | -1.9821 | 1.288496 | NOP56 |
| 0.030137 | 3.4944955 | -1.7923 | 1.1550411 | ABCF2 |
| 0.006637 | 4.7810272 | 0.76189 | 1.7432374 | C9orf106 |
| 0.001552 | 6.4241016 | 3.77826 | 1.5712856 | IKBKG |
| 0.001856 | 6.2283711 | 3.43939 | 2.7377736 | HCP5 |
| 0.016412 | 3.9808245 | -0.81935 | 1.3470714 | ZMAT5 |
| 0.041331 | 3.2396637 | -2.29874 | 1.714035 | CR1 |
| 0.008559 | 4.5326315 | 0.27631 | 1.709025 | MAPK1 |
| 0.042773 | 3.2123324 | -2.35274 | 1.1164357 | SERPINB8 |
| 0.006913 | 4.7416683 | 0.68535 | 1.5871484 | IKBIP |
| 0.020477 | 3.8007448 | -1.17972 | 1.1043103 | BACH1 |
| 0.004444 | -5.1510281 | 1.47291 | -1.2875423 | PSG1 |
| 0.007684 | -4.6389161 | 0.48481 | -1.336671 | LCE3C |
| 0.004615 | 5.1185865 | 1.41122 | 1.8241547 | ERV3-1 |
| 0.021699 | -3.7560789 | -1.26916 | -1.0378988 | MPPED2 |
| 0.040459 | 3.258116 | -2.26225 | 1.5452716 | COL11A1 |
| 0.016478 | 3.9776431 | -0.82571 | 1.9018452 | CTBP2 |
| 0.023878 | -3.6743914 | -1.43269 | -1.0151485 | CXADR |
| 0.001222 | 7.1058919 | 4.91254 | 2.3206395 | DOK1 |
| 0.021466 | 3.7669221 | -1.24744 | 1.3996252 | DPYD |
| 0.021577 | 3.7616463 | -1.25801 | 1.1847186 | FKBP1A |
| 0.043866 | 3.195475 | -2.386 | 1.475173 | FLT1 |
| 0.001342 | 6.8474531 | 4.49104 | 1.9724065 | HMGCL |
| 0.001148 | 7.8341057 | 6.04533 | 3.5438276 | LFNG |
| 0.046351 | 3.1573942 | -2.46102 | 1.0432716 | ME2 |
| 0.014053 | 4.1143744 | -0.55263 | 1.8108795 | S100A8 |
| 0.006731 | 4.7684899 | 0.73753 | 1.5533619 | SP3 |
| 0.013988 | 4.1178756 | -0.54565 | 1.1023123 | STYX |
| 0.035748 | 3.3563856 | -2.06737 | 1.5634417 | TBXAS1 |
| 0.004871 | 5.0666245 | 1.31214 | 1.7557973 | JRK |
| 0.007193 | 4.7087303 | 0.62118 | 1.6646281 | CTDP1 |
| 0.006804 | 4.7580772 | 0.71728 | 1.5261092 | STARD3 |
| 0.019652 | 3.8355656 | -1.11 | 1.3188226 | CBX1 |
| 0.042022 | 3.2259732 | -2.3258 | 1.0229193 | MCTS1 |
| 0.002621 | 5.7547752 | 2.59546 | 2.1628753 | MED18 |
| 0.01305 | 4.174791 | -0.43222 | 1.7671021 | PIGX |
| 0.015725 | 4.0200006 | -0.74104 | 1.4708748 | ZNF692 |
| 0.003036 | 5.5864702 | 2.2876 | 2.0962935 | VPS35 |
| 0.002448 | 5.8417819 | 2.75301 | 1.6654507 | PPAN |
| 0.037747 | 3.3149984 | -2.14954 | 1.2977962 | IFT46 |
| 0.025106 | 3.6322381 | -1.51704 | 2.2427244 | KIAA1257 |
| 0.04729 | 3.1434849 | -2.48838 | 1.0220396 | HM13 |
| 0.020716 | 3.792545 | -1.19614 | 1.1052773 | TRIM5 |
| 0.037675 | 3.3165491 | -2.14647 | 1.2177081 | NAV1 |
| 0.016364 | 3.9852405 | -0.81052 | 1.2769018 | RN7SK |
| 0.032351 | 3.4396655 | -1.90164 | 1.2808818 | ACSF3 |
| 0.010785 | 4.3381879 | -0.10758 | 1.1191334 | APOBEC3F |
| 0.041863 | -3.2291462 | -2.31953 | -1.1911112 | FAM217A |
| 0.007609 | 4.652472 | 0.51132 | 1.4013141 | TCAIM |
| 0.009631 | 4.4263969 | 0.06694 | 2.2644418 | C10orf105 |
| 0.002352 | 5.9519944 | 2.95097 | 1.5855027 | TMEM91 |
| 0.003647 | 5.3642069 | 1.87494 | 1.5865941 | KIAA0754 |
| 0.009538 | 4.436197 | 0.08629 | 2.7227494 | NCF1B |
| 0.008949 | 4.4898907 | 0.19219 | 1.2422329 | CPT1B |
| 0.023897 | 3.6736733 | -1.43412 | 1.8131902 | MRVI1-AS1 |
| 0.009005 | 4.4820495 | 0.17674 | 2.1415884 | LOC400499 |
| 0.046 | -3.1634115 | -2.44918 | -1.6701663 | LINC00687 |
| 0.014205 | -4.1062014 | -0.56893 | -1.4273917 | LOC100996465 |
| 0.029369 | 3.5157693 | -1.74983 | 1.1182233 | CCDC85C |
| 0.031504 | 3.4585175 | -1.86406 | 1.9688437 | LOC100996546 |
| 0.034208 | 3.3903275 | -1.99988 | 1.1560625 | GIPC3 |
| 0.002948 | 5.6109689 | 2.33267 | 1.5214761 | JAK3 |
| 0.022418 | 3.7329573 | -1.31545 | 1.0287945 | C21orf91 |
| 0.02094 | 3.7839983 | -1.21325 | 1.493741 | SERAC1 |
| 0.036781 | 3.3338349 | -2.11216 | 1.6776487 | LPAR1 |
| 0.006296 | 4.8354091 | 0.86737 | 1.1241883 | NRF1 |
| 0.011125 | 4.3091861 | -0.16508 | 1.284208 | AGPAT5 |
| 0.009182 | 4.4640496 | 0.14125 | 1.6235806 | PPP2CB |
| 0.032853 | 3.4253767 | -1.93011 | 1.595804 | CENPBD1 |
| 0.024995 | 3.6356722 | -1.51017 | 1.2083036 | POP4 |
| 0.001397 | 6.6223564 | 4.1155 | 2.1797679 | MTMR10 |
| 0.009006 | 4.4811353 | 0.17494 | 1.7260268 | DHFRL1 |
| 0.03252 | 3.432255 | -1.9164 | 1.2017484 | CBX5 |
| 0.005013 | 5.0377438 | 1.25692 | 3.2900097 | TECPR2 |
| 0.008002 | 4.5973035 | 0.4033 | 1.3283791 | ASPHD2 |
| 0.0083 | 4.5611095 | 0.33228 | 1.0517093 | USP47 |
| 0.007744 | 4.6303701 | 0.46808 | 1.1663861 | KLHL7 |
| 0.017976 | -3.9141317 | -0.95275 | -1.3767502 | NR1D2 |
| 0.012098 | 4.2359829 | -0.31045 | 1.2682341 | ARL6IP6 |
| 0.005084 | 5.0264568 | 1.23532 | 1.5887627 | ACTR2 |
| 0.026495 | 3.5906554 | -1.6002 | 1.3768002 | TRIM58 |
| 0.01353 | 4.1438917 | -0.49378 | 1.0618658 | PRKAA1 |
| 0.001222 | 7.4135893 | 5.401 | 2.2963658 | WIPF1 |
| 0.008601 | 4.5265461 | 0.26434 | 1.3620834 | ATP7A |
| 0.002975 | 5.6026431 | 2.31736 | 2.1224405 | YIPF5 |
| 0.007642 | 4.6485362 | 0.50363 | 1.3783267 | METTL21A |
| 0.006061 | 4.8694029 | 0.93314 | 2.2514825 | MARCKS |
| 0.010377 | 4.3690084 | -0.04654 | 1.7874581 | ZNF710 |
| 0.005964 | 4.8811681 | 0.95588 | 2.3261729 | BPNT1 |
| 0.018347 | -3.8976338 | -0.98576 | -1.0667479 | PCDHB16 |
| 0.013405 | 4.1533167 | -0.475 | 1.1119238 | ZMYM5 |
| 0.004567 | 5.1265719 | 1.42642 | 1.7051847 | PTEN |
| 0.018108 | -3.9079111 | -0.96519 | -1.3276488 | TMEM67 |
| 0.02012 | 3.8153022 | -1.15057 | 2.0436845 | SOS1 |
| 0.004451 | 5.149084 | 1.46922 | 1.531775 | WDFY2 |
| 0.003067 | 5.577453 | 2.27099 | 1.265002 | EPM2AIP1 |
| 0.004549 | 5.1298884 | 1.43273 | 2.0286941 | DHTKD1 |
| 0.007264 | 4.6972534 | 0.59879 | 1.9579323 | C1GALT1C1 |
| 0.003597 | 5.3785511 | 1.90177 | 1.932142 | KDSR |
| 0.027711 | 3.5572432 | -1.66699 | 1.2321041 | PRKACB |
| 0.003402 | 5.4534425 | 2.04143 | 3.250645 | MEF2C |
| 0.02282 | 3.7176167 | -1.34616 | 1.2457363 | TTF2 |
| 0.040996 | 3.2481572 | -2.28195 | 1.1315916 | RECQL |
| 0.004018 | 5.2492744 | 1.65893 | 1.7298126 | BTBD7 |
| 0.005019 | 5.0359535 | 1.2535 | 2.0719398 | SLC36A1 |
| 0.009005 | 4.482796 | 0.17821 | 1.3516698 | SETD5 |
| 0.024422 | 3.6550336 | -1.47143 | 1.9801002 | DDX60L |
| 0.037875 | -3.3119751 | -2.15554 | -1.2662562 | TFAP2A |
| 0.006813 | 4.7527693 | 0.70696 | 1.6309644 | RALGAPB |
| 0.017781 | 3.9225399 | -0.93592 | 2.7211205 | FGL2 |
| 0.003401 | 5.4716429 | 2.07526 | 1.9758733 | PHF20L1 |
| 0.002528 | 5.7919669 | 2.66294 | 2.4732391 | SPTSSA |
| 0.02323 | 3.7032157 | -1.37499 | 1.0027937 | SMG1 |
| 0.013047 | 4.1757824 | -0.43025 | 1.6538854 | C5orf28 |
| 0.021527 | 3.7638701 | -1.25356 | 1.4220149 | CA5B |
| 0.012185 | 4.2311914 | -0.31998 | 1.3328632 | ZSCAN29 |
| 0.000978 | 8.0183965 | 6.31939 | 2.6331792 | RNF24 |
| 0.022311 | 3.7376715 | -1.30601 | 1.3205189 | TRERF1 |
| 0.005653 | 4.9290354 | 1.04821 | 2.7634859 | PADI2 |
| 0.044419 | 3.1856715 | -2.40533 | 1.1894168 | SERBP1 |
| 0.018814 | 3.8756106 | -1.02984 | 1.1888362 | TXL |
| 0.015975 | 4.0039877 | -0.77304 | 1.3290442 | ACLY |
| 0.002244 | 5.9899871 | 3.01879 | 1.6609997 | DNAJC16 |
| 0.035066 | 3.3698129 | -2.04068 | 2.0764945 | NAPEPLD |
| 0.039581 | 3.275799 | -2.22724 | 1.1775886 | CCNY |
| 0.007252 | 4.6990352 | 0.60227 | 1.0137783 | YAF2 |
| 0.007209 | 4.70631 | 0.61646 | 1.7165796 | ADPRH |
| 0.037219 | 3.3256864 | -2.12833 | 1.1499085 | TRIM23 |
| 0.041515 | 3.2366355 | -2.30473 | 1.2022506 | C9orf72 |
| 0.003955 | 5.2743513 | 1.70621 | 1.443206 | PRDM8 |
| 0.034475 | -3.3844347 | -2.0116 | -1.982623 | GPR115 |
| 0.004287 | 5.1812643 | 1.53029 | 1.5074296 | PICALM |
| 0.014335 | 4.0967637 | -0.58776 | 1.7904972 | EEA1 |
| 0.009015 | 4.4793473 | 0.17141 | 2.6349152 | STX11 |
| 0.02052 | 3.7984572 | -1.1843 | 1.0486276 | ANKEF1 |
| 0.001553 | 6.4164171 | 3.76507 | 3.2687946 | NFAM1 |
| 0.003978 | 5.2678388 | 1.69393 | 1.2397003 | STK24 |
| 0.017717 | 3.9260266 | -0.92895 | 1.3801093 | TMEM87B |
| 0.004143 | 5.2197796 | 1.60321 | 1.6230177 | SLCO3A1 |
| 0.015527 | 4.0329325 | -0.7152 | 1.0102405 | USP9X |
| 0.015993 | 4.0032255 | -0.77457 | 1.1237824 | HMCN2 |
| 0.008106 | 4.583935 | 0.37708 | 1.54819 | SNCA |
| 0.007729 | 4.6324634 | 0.47218 | 1.1134059 | GNA12 |
| 0.008661 | 4.5202202 | 0.2519 | 2.101651 | TMEM120A |
| 0.004692 | 5.0989606 | 1.37384 | 1.5737756 | PKP4 |
| 0.04569 | 3.1676768 | -2.44078 | 1.207777 | IGFBP3 |
| 0.015276 | 4.0502848 | -0.68054 | 1.1304928 | CACUL1 |
| 0.008296 | 4.5620945 | 0.33421 | 1.7671581 | ECE1 |
| 0.013722 | 4.1322305 | -0.51703 | 1.5187205 | ZNF831 |
| 0.009179 | 4.4645481 | 0.14223 | 1.4727721 | KIF1B |
| 0.007193 | 4.7090355 | 0.62178 | 1.7437108 | PURB |
| 0.018964 | 3.8682045 | -1.04466 | 1.5759522 | RER1 |
| 0.006637 | 4.7821604 | 0.76409 | 2.2971134 | PTAFR |
| 0.044591 | -3.1828946 | -2.4108 | -1.2502717 | FOXP4 |
| 0.02093 | 3.7846046 | -1.21204 | 1.6855697 | SH3KBP1 |
| 0.005131 | 5.0115516 | 1.20676 | 1.9764562 | N4BP1 |
| 0.029946 | 3.5006608 | -1.77999 | 1.8617833 | MMRN1 |
| 0.040764 | 3.252328 | -2.2737 | 2.5111458 | MMP8 |
| 0.003402 | 5.4549338 | 2.04421 | 3.860752 | KREMEN1 |
| 0.021604 | 3.7606791 | -1.25994 | 2.1410342 | MXD1 |
| 0.034439 | 3.3852257 | -2.01003 | 1.1019674 | ADRB1 |
| 0.003497 | 5.4101768 | 1.96084 | 1.5618303 | ZC3H4 |
| 0.030855 | 3.4751832 | -1.83083 | 1.2182003 | FIGNL2 |
| 0.039494 | 3.2772174 | -2.22443 | 1.1085677 | GUCY1A3 |
| 0.001222 | 7.0649445 | 4.84645 | 1.5264544 | SPG20 |
| 0.026039 | 3.6047575 | -1.572 | 1.3329362 | UBASH3B |
| 0.018013 | 3.912743 | -0.95553 | 1.9123541 | PTER |
| 0.014427 | -4.0924552 | -0.59636 | -1.7131974 | FAM105B |
| 0.011346 | 4.290387 | -0.20238 | 1.4145451 | MAVS |
| 0.011454 | 4.2826226 | -0.21779 | 1.3481932 | RFWD2 |
| 0.016429 | 3.9795133 | -0.82197 | 1.2902179 | SLC27A4 |
| 0.00516 | 5.0069708 | 1.19798 | 2.9158152 | MRVI1 |
| 0.010383 | 4.368204 | -0.04813 | 1.9702575 | CDKN2B |
| 0.009194 | 4.4625377 | 0.13827 | 1.3983349 | GNAI3 |
| 0.034651 | 3.380291 | -2.01984 | 1.0413369 | DIRC2 |
| 0.005804 | 4.9010981 | 0.99435 | 2.8156636 | DOT1L |
| 0.016491 | 3.9767001 | -0.82759 | 1.2449454 | GALNT6 |
| 0.003979 | 5.2635032 | 1.68576 | 1.6627778 | ELP5 |
| 0.023489 | 3.6911771 | -1.39909 | 1.6879474 | TNS1 |
| 0.003402 | 5.4596208 | 2.05292 | 1.445113 | WNK1 |
| 0.002941 | 5.6261496 | 2.36055 | 2.9075434 | TLR6 |
| 0.006595 | 4.7904397 | 0.78017 | 2.1052704 | PPP1R3B |
| 0.005218 | 4.9950456 | 1.17511 | 2.2435832 | WIPI2 |
| 0.017381 | -3.9391647 | -0.90266 | -1.0021337 | IL17RD |
| 0.002244 | 5.9964895 | 3.03038 | 1.5867698 | FYB |
| 0.00149 | 6.466727 | 3.85128 | 1.8290649 | THAP6 |
| 0.019544 | 3.8413061 | -1.09851 | 1.6311809 | MMP17 |
| 0.038924 | -3.2886232 | -2.20184 | -1.0051562 | RAX |
| 0.014135 | -4.1095399 | -0.56227 | -1.5766737 | ALX4 |
| 0.01881 | 3.8769835 | -1.02709 | 1.6187157 | CYHR1 |
| 0.012356 | 4.2193501 | -0.34353 | 1.441895 | TTPAL |
| 0.00967 | 4.4222367 | 0.05872 | 1.4323807 | ATRX |
| 0.020126 | 3.8145914 | -1.152 | 1.9444337 | ERI2 |
| 0.012684 | 4.1962751 | -0.38945 | 1.1874263 | KAT8 |
| 0.001222 | 7.0194023 | 4.77263 | 3.5239453 | SETX |
| 0.001369 | 6.6827705 | 4.21706 | 1.9551995 | CIRBP |
| 0.019011 | 3.8649868 | -1.05111 | 1.2157846 | TRMT61A |
| 0.033572 | 3.407982 | -1.96474 | 1.3508664 | ADRBK2 |
| 0.009793 | 4.4143838 | 0.0432 | 1.5512187 | TBC1D2 |
| 0.008296 | 4.5618842 | 0.3338 | 1.1767149 | EP400 |
| 0.001222 | 7.2541056 | 5.14964 | 2.7064229 | TNFRSF1A |
| 0.004368 | 5.1675426 | 1.50426 | 1.3863292 | UFSP2 |
| 0.027262 | -3.5714189 | -1.63866 | -1.6692764 | ALDH7A1 |
| 0.013898 | 4.121986 | -0.53745 | 2.4290375 | SLC45A4 |
| 0.033212 | -3.4165779 | -1.94763 | -1.0438459 | SGSM1 |
| 0.039609 | -3.2752165 | -2.22839 | -1.1822339 | AKNAD1 |
| 0.003185 | 5.5299417 | 2.1833 | 2.1220918 | TSPAN5 |
| 0.03107 | 3.4689707 | -1.84322 | 1.1221373 | CNBP |
| 0.013166 | 4.1662375 | -0.44926 | 1.7154683 | ITPRIPL2 |
| 0.017535 | 3.9326832 | -0.91563 | 1.4338312 | SNX18 |
| 0.004375 | 5.1660387 | 1.50141 | 1.3324172 | UVRAG |
| 0.009002 | 4.4841137 | 0.1808 | 1.5981602 | VAV2 |
| 0.017954 | 3.916016 | -0.94898 | 1.3510125 | PDHA1 |
| 0.005711 | 4.9167984 | 1.02463 | 1.3230198 | CSRNP2 |
| 0.010431 | 4.3636024 | -0.05724 | 1.6566124 | RIN2 |
| 0.013161 | 4.1666575 | -0.44842 | 1.1222164 | CLDN12 |
| 0.010903 | 4.3290026 | -0.12578 | 1.4362391 | CLCN4 |
| 0.025018 | 3.6350708 | -1.51137 | 1.1773152 | ANKH |
| 0.002352 | 5.9431329 | 2.93512 | 1.7105631 | CALD1 |
| 0.034248 | 3.3890951 | -2.00233 | 1.1831596 | NFYA |
| 0.006374 | 4.8225374 | 0.84243 | 1.2220014 | ATHL1 |
| 0.008342 | 4.5553759 | 0.32101 | 1.0164 | FNIP2 |
| 0.019595 | 3.8383671 | -1.1044 | 1.2100783 | PRRT3 |
| 0.034081 | 3.3950855 | -1.99041 | 1.1339606 | MAN1A2 |
| 0.010005 | 4.3951157 | 0.00511 | 1.1161312 | TMEM104 |
| 0.044891 | 3.1791062 | -2.41827 | 1.5334961 | SNX22 |
| 0.020263 | 3.8095338 | -1.16212 | 1.1115694 | VPS8 |
| 0.005564 | 4.9463359 | 1.08152 | 1.5533423 | NIPAL3 |
| 0.004197 | 5.2035836 | 1.57257 | 1.6805649 | STAT2 |
| 0.002448 | 5.8511403 | 2.76988 | 1.5999468 | NEK7 |
| 0.008153 | 4.5788004 | 0.36701 | 1.1387766 | FBXW11 |
| 0.001148 | 7.6541302 | 5.77282 | 2.300754 | CREBBP |
| 0.013652 | 4.1364945 | -0.50853 | 1.1620295 | NXPE3 |
| 0.038372 | -3.2996739 | -2.17993 | -1.0742702 | C5orf24 |
| 0.011627 | 4.2697579 | -0.24334 | 2.3179389 | CACNA1E |
| 0.002528 | 5.7903738 | 2.66005 | 2.341912 | GSN |
| 0.004263 | 5.1916767 | 1.55002 | 1.820595 | TK2 |
| 0.016088 | 3.9977977 | -0.78541 | 2.104984 | DOCK4 |
| 0.008901 | -4.4971058 | 0.2064 | -2.0062026 | PEG3 |
| 0.025661 | -3.6162165 | -1.54909 | -1.2915141 | KIAA1609 |
| 0.004987 | 5.0430252 | 1.26703 | 1.8957711 | WWP2 |
| 0.013439 | 4.1498321 | -0.48194 | 1.1063102 | HCCS |
| 0.009552 | 4.4332296 | 0.08043 | 1.2238683 | KPNA1 |
| 0.004268 | 5.1880419 | 1.54314 | 2.0529869 | DHX34 |
| 0.015606 | 4.0255583 | -0.72994 | 1.5786925 | ALCAM |
| 0.018848 | 3.8729485 | -1.03517 | 1.1106393 | CUL4B |
| 0.024015 | 3.6682741 | -1.44493 | 1.3398404 | ZFAND5 |
| 0.001222 | 7.1350674 | 4.95948 | 1.8274576 | HNRPLL |
| 0.001347 | 6.779888 | 4.37914 | 1.915584 | C14orf101 |
| 0.025428 | 3.6220259 | -1.53747 | 1.0750557 | TM2D2 |
| 0.001376 | 6.6694199 | 4.19467 | 2.9907475 | TLR4 |
| 0.020312 | 3.8076722 | -1.16585 | 1.4738244 | ITGAD |
| 0.003834 | 5.3152516 | 1.78314 | 2.6553519 | MPEG1 |
| 0.016763 | 3.9667259 | -0.84754 | 1.3297102 | DUSP3 |
| 0.028303 | 3.542214 | -1.69702 | 1.3952807 | CCDC88A |
| 0.022609 | 3.7248324 | -1.33172 | 1.2061596 | STK10 |
| 0.005392 | 4.9690875 | 1.12527 | 1.5826305 | LAMP2 |
| 0.001369 | 6.6806452 | 4.2135 | 1.6490911 | HNRNPA0 |
| 0.005085 | 5.0256974 | 1.23386 | 3.4452087 | IFNAR1 |
| 0.007014 | 4.7266355 | 0.65608 | 1.5021677 | INSIG2 |
| 0.019152 | 3.8573877 | -1.06632 | 1.0555221 | CDK12 |
| 0.00211 | 6.0805595 | 3.17961 | 1.8839436 | SYNRG |
| 0.005177 | 5.0022691 | 1.18897 | 1.9384974 | GDAP2 |
| 0.026444 | 3.5924602 | -1.59659 | 1.1793384 | SF3A1 |
| 0.01356 | 4.1424837 | -0.49659 | 1.0703869 | CCDC82 |
| 0.001148 | 7.5965343 | 5.68459 | 2.246954 | NF1 |
| 0.024713 | 3.645952 | -1.4896 | 1.3973163 | STAM2 |
| 0.00842 | 4.5492411 | 0.30896 | 2.3565362 | CCR2 |
| 0.0074 | 4.6821746 | 0.56936 | 1.3675379 | CTBS |
| 0.003493 | 5.4136973 | 1.96741 | 1.8316134 | PPARA |
| 0.03499 | 3.3732084 | -2.03393 | 1.0562836 | BBS10 |
| 0.020141 | 3.8136417 | -1.1539 | 1.256097 | CNOT6 |
| 0.010444 | -4.361152 | -0.06209 | -1.456044 | VASH2 |
| 0.010637 | 4.3484443 | -0.08726 | 1.2720987 | AZI2 |
| 0.005619 | 4.9362538 | 1.06211 | 1.7506181 | ITPKC |
| 0.026212 | 3.5992703 | -1.58298 | 1.8773327 | MS4A7 |
| 0.00149 | 6.4645903 | 3.84763 | 2.8557358 | NADK |
| 0.020734 | 3.7908138 | -1.19961 | 1.221729 | SLC6A6 |
| 0.019924 | 3.8232912 | -1.13458 | 1.1719734 | PCNX |
| 0.003133 | 5.5535721 | 2.22695 | 1.7690403 | QKI |
| 0.011725 | -4.2622173 | -0.25832 | -1.4494019 | NOL4 |
| 0.002448 | 5.855902 | 2.77847 | 2.4888466 | TET2 |
| 0.04723 | 3.1445452 | -2.4863 | 1.3572964 | RAPH1 |
| 0.002833 | 5.6811884 | 2.46136 | 1.3900253 | RBM12B |
| 0.006226 | 4.8425663 | 0.88123 | 2.3676755 | DDX58 |
| 0.013179 | 4.1644447 | -0.45283 | 2.0780123 | ARHGAP26 |
| 0.035065 | 3.3708808 | -2.03856 | 1.1008001 | TEP1 |
| 0.001388 | 6.6465658 | 4.15627 | 2.0549292 | PTPRJ |
| 0.015837 | 4.0106682 | -0.75969 | 2.5708116 | CD36 |
| 0.024005 | 3.6689763 | -1.44353 | 1.1838273 | UBN2 |
| 0.008503 | 4.5404934 | 0.29177 | 1.0108171 | GID4 |
| 0.033996 | 3.3978894 | -1.98483 | 1.0785125 | LARP1 |
| 0.020806 | 3.7882033 | -1.20483 | 1.2411502 | ATP9B |
| 0.021625 | 3.7595909 | -1.26212 | 1.4597158 | SOCS3 |
| 0.009826 | 4.4117798 | 0.03806 | 1.4770392 | ALG2 |
| 0.013976 | -4.1185873 | -0.54423 | -1.0625607 | ECT2L |
| 0.01154 | 4.2762965 | -0.23035 | 1.4958637 | NEK9 |
| 0.001222 | 7.1250421 | 4.94337 | 4.7511096 | STEAP4 |
| 0.023158 | 3.7068858 | -1.36764 | 1.2916408 | PTPRE |
| 0.013778 | 4.1289603 | -0.52355 | 1.6540492 | SKAP2 |
| 0.005581 | 4.9427484 | 1.07461 | 1.5293526 | NUP43 |
| 0.004691 | 5.1014453 | 1.37857 | 1.3579686 | HCFC2 |
| 0.008922 | 4.4945824 | 0.20143 | 2.0506159 | B3GALT6 |
| 0.024713 | 3.6453717 | -1.49076 | 1.379422 | INSR |
| 0.003854 | 5.3061477 | 1.76604 | 1.4313235 | SORL1 |
| 0.009002 | 4.4847497 | 0.18206 | 1.626207 | NHLRC1 |
| 0.001986 | 6.1712031 | 3.33931 | 2.8397674 | ST8SIA4 |
| 0.006765 | 4.7635153 | 0.72786 | 1.8758279 | C17orf80 |
| 0.004156 | 5.2142348 | 1.59272 | 1.4833987 | WDR37 |
| 0.009766 | 4.4164215 | 0.04723 | 1.6505411 | RYBP |
| 0.010444 | 4.3612783 | -0.06184 | 1.2039665 | LYRM7 |
| 0.017774 | 3.9236198 | -0.93376 | 1.3082972 | ANGEL1 |
| 0.007544 | 4.6612183 | 0.52842 | 2.1427462 | NDST1 |
| 0.038274 | 3.3038278 | -2.1717 | 1.0304144 | FAM126B |
| 0.01065 | 4.3469365 | -0.09025 | 1.3887803 | ZNF250 |
| 0.00211 | 6.0763725 | 3.1722 | 1.9555403 | VPS13D |
| 0.007602 | 4.6536541 | 0.51364 | 1.5489666 | MEF2A |
| 0.011682 | 4.2660381 | -0.25073 | 1.1092203 | TRMT13 |
| 0.015674 | 4.0228145 | -0.73542 | 1.0967468 | OPA3 |
| 0.012521 | 4.2067985 | -0.3685 | 1.3576594 | IL2RA |
| 0.003026 | 5.5901347 | 2.29435 | 1.728154 | AKIRIN1 |
| 0.038367 | 3.3000279 | -2.17923 | 1.1146548 | RRM2 |
| 0.001996 | 6.160479 | 3.32048 | 2.0071339 | CAMTA1 |
| 0.015606 | 4.0253639 | -0.73032 | 1.1031675 | OPTN |
| 0.016921 | 3.9592815 | -0.86243 | 1.2230448 | TIPRL |
| 0.022129 | 3.7430499 | -1.29524 | 1.0288413 | PARP4 |
| 0.012502 | 4.2082402 | -0.36563 | 1.1663287 | XPO7 |
| 0.035107 | 3.3689941 | -2.04231 | 1.0614151 | PARP14 |
| 0.01901 | 3.8655987 | -1.04988 | 1.9101518 | TMCC3 |
| 0.007874 | 4.6148744 | 0.43774 | 2.1867028 | FAM65B |
| 0.011725 | 4.2632218 | -0.25632 | 1.6412385 | EGLN1 |
| 0.025106 | 3.6324037 | -1.51671 | 1.2722402 | XG |
| 0.004643 | 5.1130962 | 1.40077 | 1.9502637 | C17orf103 |
| 0.003834 | 5.3248697 | 1.8012 | 1.4724655 | CD40 |
| 0.009179 | 4.4654308 | 0.14398 | 1.5566391 | CSF2RB |
| 0.011816 | 4.2544557 | -0.27374 | 2.4565727 | C9orf64 |
| 0.033782 | 3.4024169 | -1.97582 | 1.3020198 | C19orf12 |
| 0.013431 | 4.1505787 | -0.48045 | 1.2243529 | NACC1 |
| 0.002446 | 5.8590274 | 2.7841 | 2.1303159 | MCTP2 |
| 0.009826 | 4.4116511 | 0.0378 | 2.7161172 | CCNJL |
| 0.006963 | 4.7356081 | 0.67355 | 1.7363443 | POLH |
| 0.018468 | 3.8911295 | -0.99878 | 1.5823862 | PHKB |
| 0.010988 | 4.3209709 | -0.14171 | 1.4157444 | MARK2 |
| 0.007765 | 4.6286256 | 0.46467 | 1.1031342 | CALML4 |
| 0.038508 | 3.2969119 | -2.18541 | 1.3855425 | TMEM19 |
| 0.040631 | 3.2546101 | -2.26918 | 1.2684063 | UBTD2 |
| 0.01818 | 3.9047332 | -0.97155 | 1.4732859 | PLAC8 |
| 0.002356 | 5.9064667 | 2.86941 | 2.0381456 | MTIF3 |
| 0.010462 | 4.3599723 | -0.06443 | 1.370577 | PAK2 |
| 0.00513 | 5.0127916 | 1.20914 | 1.7330468 | TIMM8B |
| 0.023463 | 3.6934456 | -1.39455 | 1.3098248 | MAP1LC3B2 |
| 0.003521 | 5.4038589 | 1.94905 | 1.4872748 | AIDA |
| 0.014567 | -4.0839185 | -0.6134 | -1.0386356 | HAVCR1 |
| 0.012725 | -4.1928154 | -0.39633 | -1.2414536 | PLXNA4 |
| 0.00513 | -5.0127106 | 1.20898 | -1.4322524 | KRTAP21-3 |
| 0.006374 | -4.8226363 | 0.84262 | -1.6705938 | ZMYM3 |
| 0.017312 | 3.9431649 | -0.89466 | 1.3103698 | CXorf40A |
| 0.04861 | 3.1223056 | -2.53 | 1.5544421 | IGLL5 |
| 0.031967 | -3.4471333 | -1.88676 | -1.2846729 | ADAM18 |
| 0.018489 | 3.8903885 | -1.00026 | 1.0107494 | ANKRD44 |
| 0.02475 | -3.6435436 | -1.49442 | -1.0060924 | PLEKHA8 |
| 0.029094 | -3.5224178 | -1.73656 | -1.4608914 | ZNF806 |
| 0.028016 | 3.5505584 | -1.68035 | 1.1687498 | CNTNAP3B |
| 0.003834 | 5.3166595 | 1.78579 | 1.5286757 | DEXI |
| 0.010785 | 4.3379992 | -0.10795 | 1.2693495 | PRMT2 |
| 0.018148 | 3.9059879 | -0.96904 | 1.0465893 | LOC441124 |
| 0.013414 | 4.1525677 | -0.47649 | 1.7695902 | KIF13A |
| 0.002621 | 5.756748 | 2.59905 | 1.7112102 | DGUOK |
| 0.025161 | 3.6302058 | -1.5211 | 1.2056462 | FLII |
| 0.013136 | 4.1699602 | -0.44184 | 1.4374347 | CLIC1 |
| 0.020488 | 3.8001158 | -1.18098 | 1.0645768 | TFB1M |
| 0.031895 | 3.4487322 | -1.88357 | 1.0264791 | MNAT1 |
| 0.003546 | 5.3937649 | 1.93021 | 1.8772414 | PHF21A |
| 0.029545 | 3.5115733 | -1.75821 | 1.277608 | KLHL24 |
| 0.034721 | 3.3783859 | -2.02363 | 1.0585648 | ZNF24 |
| 0.004658 | 5.1081036 | 1.39126 | 1.567065 | CBL |
| 0.011162 | 4.3027797 | -0.17779 | 1.296581 | ARPC4 |
| 0.025503 | 3.6203332 | -1.54085 | 1.1803516 | SDHC |
| 0.011413 | -4.2851811 | -0.21271 | -1.0063437 | ARGFXP2 |
| 0.047372 | 3.1422074 | -2.4909 | 2.077814 | IL1RN |
| 0.035023 | 3.3721979 | -2.03594 | 1.1554622 | AGPAT3 |
| 0.028636 | 3.5352629 | -1.7109 | 1.3882703 | G6PD |
| 0.001222 | 7.4807159 | 5.50565 | 1.8910715 | NDUFAF3 |
| 0.009179 | 4.4651075 | 0.14334 | 1.3522468 | IKZF3 |
| 0.00259 | 5.7678796 | 2.61926 | 1.8051023 | SPTLC2 |
| 0.00323 | 5.5164468 | 2.15833 | 1.9514814 | GALC |
| 0.002948 | -5.6202019 | 2.34963 | -2.0844337 | LYPD6 |
| 0.004567 | 5.1271168 | 1.42745 | 2.5689033 | CHST11 |
| 0.004749 | 5.0877109 | 1.35239 | 1.5092987 | TMEM216 |
| 0.021856 | 3.7511406 | -1.27904 | 1.2104836 | SNX6 |
| 0.049487 | 3.1091877 | -2.55575 | 1.0402251 | CIC |
| 0.001854 | 6.2372206 | 3.45484 | 2.6226442 | IL6R |
| 0.00284 | 5.6785899 | 2.45661 | 1.8909707 | GIMAP1 |
| 0.006559 | 4.7941699 | 0.78741 | 1.7854055 | SKI |
| 0.008102 | -4.585383 | 0.37992 | -1.454297 | ADCY5 |
| 0.005704 | 4.9195712 | 1.02997 | 1.3928781 | LCAT |
| 0.002771 | 5.7035722 | 2.50223 | 2.9559857 | HAL |
| 0.002827 | 5.6861106 | 2.47035 | 1.6394095 | TMEM127 |
| 0.010844 | 4.3334691 | -0.11693 | 1.7342663 | RAB3D |
| 0.003401 | 5.4630702 | 2.05933 | 1.8846118 | TBC1D22A |
| 0.030226 | 3.4908685 | -1.79954 | 1.2682584 | ANKRD13A |
| 0.041528 | 3.2352989 | -2.30737 | 2.5385369 | SERPINB2 |
| 0.006434 | 4.8110927 | 0.82024 | 1.2688539 | UBE2I |
| 0.005619 | 4.9353345 | 1.06034 | 1.2131483 | SLC30A6 |
| 0.014313 | 4.0988728 | -0.58355 | 1.2889742 | ELAVL1 |
| 0.013414 | 4.151936 | -0.47775 | 1.6519906 | RHOQ |
| 0.001369 | 6.6906798 | 4.23032 | 1.6219643 | RAB11A |
| 0.004786 | 5.0805668 | 1.33876 | 1.4409946 | EYA3 |
| 0.01555 | 4.0308852 | -0.71929 | 1.3446198 | RPRD1A |
| 0.030035 | 3.4978897 | -1.78552 | 1.0456144 | BCAS3 |
| 0.006082 | 4.8665829 | 0.92769 | 1.5402136 | RERE |
| 0.002863 | 5.6675858 | 2.43648 | 1.8201173 | CD300E |
| 0.006643 | 4.7796664 | 0.75925 | 1.9407372 | NACC2 |
| 0.041104 | -3.245406 | -2.28739 | -1.1071962 | POPDC3 |
| 0.028784 | -3.5312655 | -1.71889 | -1.1672893 | PROX1 |
| 0.011399 | 4.286347 | -0.2104 | 1.4355457 | KIAA2013 |
| 0.020066 | 3.8169793 | -1.14722 | 1.1599032 | FAM200A |
| 0.002845 | 5.676461 | 2.45272 | 2.5029282 | DAPK2 |
| 0.011153 | 4.3051872 | -0.17301 | 1.6598942 | ACTN4 |
| 0.009538 | 4.4362096 | 0.08631 | 1.7965649 | HIP1 |
| 0.004871 | 5.0691222 | 1.31691 | 3.9751462 | ALPL |
| 0.036294 | 3.3439221 | -2.09213 | 1.0033922 | KCNAB2 |
| 0.02953 | 3.5122524 | -1.75685 | 1.869308 | CPD |
| 0.023501 | 3.6907489 | -1.39995 | 1.0889863 | PDZD11 |
| 0.038377 | 3.299384 | -2.18051 | 1.1618736 | STRN3 |
| 0.006813 | 4.7526311 | 0.70669 | 1.4331576 | LPGAT1 |
| 0.0383 | 3.3032292 | -2.17289 | 1.1735367 | HS6ST3 |
| 0.003603 | 5.3759482 | 1.89691 | 2.332665 | PLXNC1 |
| 0.007888 | 4.6131425 | 0.43434 | 1.5349284 | ANTXR2 |
| 0.023757 | -3.6800714 | -1.42132 | -1.7522918 | MTHFR |
| 0.001338 | 6.8706334 | 4.52927 | 1.5747438 | CEP170P1 |
| 0.020595 | 3.7960981 | -1.18903 | 1.9033506 | STXBP5 |
| 0.02907 | 3.5233927 | -1.73461 | 1.4690136 | SP100 |
| 0.002635 | 5.7506732 | 2.58801 | 1.6638124 | NFYC |
| 0.021491 | 3.7653807 | -1.25053 | 1.0609492 | LRSAM1 |
| 0.004143 | 5.222568 | 1.60848 | 2.6877291 | CYP4F2 |
| 0.015762 | 4.0159396 | -0.74916 | 2.9323719 | CNTNAP3 |
| 0.030189 | 3.49301 | -1.79526 | 1.5271762 | HLA-DQB1 |
| 0.036965 | 3.3303729 | -2.11903 | 1.5139903 | LOC392288 |
| 0.008504 | 4.5390856 | 0.289 | 1.256491 | LOC101059921 |
| 0.001991 | 6.1656491 | 3.32956 | 2.0762135 | MRPS18C |

Supplementary Table 3 | Overlap DEGs PPI

| #node1 | node2 | node1_string_id | node2_string_id | coexpression | combined_score |
| --- | --- | --- | --- | --- | --- |
| ACAP1 | PLEK | 9606.ENSP00000158762 | 9606.ENSP00000234313 | 0.13 | 0.47 |
| ADAM8 | STK10 | 9606.ENSP00000453302 | 9606.ENSP00000176763 | 0.138 | 0.91 |
| ADAM8 | SELPLG | 9606.ENSP00000453302 | 9606.ENSP00000228463 | 0.213 | 0.583 |
| ADAM8 | S1PR4 | 9606.ENSP00000453302 | 9606.ENSP00000246115 | 0.536 | 0.539 |
| ADAM8 | CYBA | 9606.ENSP00000453302 | 9606.ENSP00000261623 | 0.145 | 0.912 |
| ADAM8 | CD53 | 9606.ENSP00000453302 | 9606.ENSP00000271324 | 0.176 | 0.914 |
| ADAM8 | FERMT3 | 9606.ENSP00000453302 | 9606.ENSP00000279227 | 0.25 | 0.784 |
| ADAM8 | CLEC4D | 9606.ENSP00000453302 | 9606.ENSP00000299665 | 0.208 | 0.928 |
| ADAM8 | MMP25 | 9606.ENSP00000453302 | 9606.ENSP00000337816 | 0.138 | 0.93 |
| ADAM8 | CD300A | 9606.ENSP00000453302 | 9606.ENSP00000353259 | 0.21 | 0.918 |
| ADAM8 | NCF2 | 9606.ENSP00000453302 | 9606.ENSP00000356505 | 0.446 | 0.446 |
| ADAM8 | MMP9 | 9606.ENSP00000453302 | 9606.ENSP00000361405 | 0.202 | 0.659 |
| ADAM8 | PTAFR | 9606.ENSP00000453302 | 9606.ENSP00000362965 | 0.14 | 0.91 |
| ADAM8 | LAIR1 | 9606.ENSP00000453302 | 9606.ENSP00000375622 | 0.092 | 0.908 |
| ADAM8 | RAB37 | 9606.ENSP00000453302 | 9606.ENSP00000376390 | 0.065 | 0.902 |
| ADAM8 | TRPM2 | 9606.ENSP00000453302 | 9606.ENSP00000381023 | 0.098 | 0.905 |
| ADAM8 | LCP1 | 9606.ENSP00000453302 | 9606.ENSP00000381581 | 0.203 | 0.767 |
| ADAM8 | LPXN | 9606.ENSP00000453302 | 9606.ENSP00000431284 | 0.178 | 0.804 |
| ADAM8 | ITGAX | 9606.ENSP00000453302 | 9606.ENSP00000454623 | 0.246 | 0.929 |
| ALOX5 | TLR2 | 9606.ENSP00000363512 | 9606.ENSP00000260010 | 0.336 | 0.552 |
| ALOX5 | TLR8 | 9606.ENSP00000363512 | 9606.ENSP00000312082 | 0.333 | 0.45 |
| ALOX5 | NCF2 | 9606.ENSP00000363512 | 9606.ENSP00000356505 | 0.319 | 0.439 |
| ALOX5 | MNDA | 9606.ENSP00000363512 | 9606.ENSP00000357123 | 0.419 | 0.426 |
| ALOX5 | MMP9 | 9606.ENSP00000363512 | 9606.ENSP00000361405 | 0.159 | 0.494 |
| ALOX5 | FGR | 9606.ENSP00000363512 | 9606.ENSP00000363117 | 0.404 | 0.615 |
| ALOX5 | NCF4 | 9606.ENSP00000363512 | 9606.ENSP00000380334 | 0.337 | 0.409 |
| ALOX5 | SYK | 9606.ENSP00000363512 | 9606.ENSP00000364907 | 0.253 | 0.411 |
| ALOX5 | OXER1 | 9606.ENSP00000363512 | 9606.ENSP00000367930 | 0.14 | 0.595 |
| ALOX5 | ALOX5AP | 9606.ENSP00000363512 | 9606.ENSP00000479870 | 0.32 | 0.997 |
| ALOX5AP | PLEK | 9606.ENSP00000479870 | 9606.ENSP00000234313 | 0.685 | 0.685 |
| ALOX5AP | TLR2 | 9606.ENSP00000479870 | 9606.ENSP00000260010 | 0.338 | 0.421 |
| ALOX5AP | CD53 | 9606.ENSP00000479870 | 9606.ENSP00000271324 | 0.553 | 0.632 |
| ALOX5AP | HCLS1 | 9606.ENSP00000479870 | 9606.ENSP00000320176 | 0.563 | 0.611 |
| ALOX5AP | C1orf162 | 9606.ENSP00000479870 | 9606.ENSP00000344218 | 0.769 | 0.769 |
| ALOX5AP | NCF2 | 9606.ENSP00000479870 | 9606.ENSP00000356505 | 0.564 | 0.603 |
| ALOX5AP | MNDA | 9606.ENSP00000479870 | 9606.ENSP00000357123 | 0.542 | 0.555 |
| ALOX5AP | TNFAIP8L2 | 9606.ENSP00000479870 | 9606.ENSP00000357906 | 0.54 | 0.54 |
| ALOX5AP | FGR | 9606.ENSP00000479870 | 9606.ENSP00000363117 | 0.561 | 0.564 |
| ALOX5AP | OXER1 | 9606.ENSP00000479870 | 9606.ENSP00000367930 | 0.098 | 0.433 |
| ALOX5AP | NCF4 | 9606.ENSP00000479870 | 9606.ENSP00000380334 | 0.538 | 0.55 |
| ALOX5AP | SLA | 9606.ENSP00000479870 | 9606.ENSP00000394049 | 0.678 | 0.678 |
| AMICA1 | S1PR4 | 9606.ENSP00000348635 | 9606.ENSP00000246115 | 0.671 | 0.713 |
| AMICA1 | C1orf162 | 9606.ENSP00000348635 | 9606.ENSP00000344218 | 0.558 | 0.558 |
| AMICA1 | MNDA | 9606.ENSP00000348635 | 9606.ENSP00000357123 | 0.541 | 0.603 |
| ANKRD44 | PPP6R2 | 9606.ENSP00000282272 | 9606.ENSP00000478417 | 0.061 | 0.824 |
| APBB1IP | PLEK | 9606.ENSP00000365411 | 9606.ENSP00000234313 | 0.349 | 0.625 |
| APBB1IP | RAC2 | 9606.ENSP00000365411 | 9606.ENSP00000249071 | 0.328 | 0.617 |
| APBB1IP | CYTIP | 9606.ENSP00000365411 | 9606.ENSP00000264192 | 0.343 | 0.402 |
| APBB1IP | CD53 | 9606.ENSP00000365411 | 9606.ENSP00000271324 | 0.524 | 0.524 |
| APBB1IP | FERMT3 | 9606.ENSP00000365411 | 9606.ENSP00000279227 | 0.323 | 0.766 |
| APBB1IP | NCKAP1L | 9606.ENSP00000365411 | 9606.ENSP00000293373 | 0.302 | 0.458 |
| APBB1IP | HCLS1 | 9606.ENSP00000365411 | 9606.ENSP00000320176 | 0.533 | 0.57 |
| APBB1IP | LCK | 9606.ENSP00000365411 | 9606.ENSP00000337825 | 0.089 | 0.598 |
| APBB1IP | FGR | 9606.ENSP00000365411 | 9606.ENSP00000363117 | 0.324 | 0.45 |
| APBB1IP | SYK | 9606.ENSP00000365411 | 9606.ENSP00000364907 | 0.124 | 0.931 |
| APBB1IP | VAV1 | 9606.ENSP00000365411 | 9606.ENSP00000472929 | 0.207 | 0.535 |
| APBB1IP | FYB | 9606.ENSP00000365411 | 9606.ENSP00000427114 | 0.352 | 0.759 |
| APOBR | TMEM154 | 9606.ENSP00000457539 | 9606.ENSP00000302144 | 0.078 | 0.45 |
| ARHGAP25 | PLEK | 9606.ENSP00000386911 | 9606.ENSP00000234313 | 0.553 | 0.617 |
| ARHGAP25 | S1PR4 | 9606.ENSP00000386911 | 9606.ENSP00000246115 | 0.53 | 0.53 |
| ARHGAP25 | CYTH4 | 9606.ENSP00000386911 | 9606.ENSP00000248901 | 0.533 | 0.533 |
| ARHGAP25 | RAC2 | 9606.ENSP00000386911 | 9606.ENSP00000249071 | 0.189 | 0.944 |
| ARHGAP25 | CD53 | 9606.ENSP00000386911 | 9606.ENSP00000271324 | 0.536 | 0.622 |
| ARHGAP25 | HCLS1 | 9606.ENSP00000386911 | 9606.ENSP00000320176 | 0.439 | 0.439 |
| ARHGAP25 | ARHGAP30 | 9606.ENSP00000386911 | 9606.ENSP00000356992 | 0.348 | 0.432 |
| ARHGAP25 | MNDA | 9606.ENSP00000386911 | 9606.ENSP00000357123 | 0.315 | 0.41 |
| ARHGAP25 | ARHGAP9 | 9606.ENSP00000386911 | 9606.ENSP00000377380 | 0.327 | 0.448 |
| ARHGAP30 | PLEK | 9606.ENSP00000356992 | 9606.ENSP00000234313 | 0.551 | 0.551 |
| ARHGAP30 | S1PR4 | 9606.ENSP00000356992 | 9606.ENSP00000246115 | 0.579 | 0.579 |
| ARHGAP30 | RAC2 | 9606.ENSP00000356992 | 9606.ENSP00000249071 | 0.385 | 0.936 |
| ARHGAP30 | CD53 | 9606.ENSP00000356992 | 9606.ENSP00000271324 | 0.423 | 0.423 |
| ARHGAP30 | FERMT3 | 9606.ENSP00000356992 | 9606.ENSP00000279227 | 0.555 | 0.633 |
| ARHGAP30 | NCKAP1L | 9606.ENSP00000356992 | 9606.ENSP00000293373 | 0.43 | 0.47 |
| ARHGAP30 | HCLS1 | 9606.ENSP00000356992 | 9606.ENSP00000320176 | 0.391 | 0.545 |
| ARHGAP30 | MYO1F | 9606.ENSP00000356992 | 9606.ENSP00000344871 | 0.445 | 0.445 |
| ARHGAP30 | NCF2 | 9606.ENSP00000356992 | 9606.ENSP00000356505 | 0.494 | 0.494 |
| ARHGAP30 | SLA | 9606.ENSP00000356992 | 9606.ENSP00000394049 | 0.533 | 0.533 |
| ARHGAP30 | NCF4 | 9606.ENSP00000356992 | 9606.ENSP00000380334 | 0.54 | 0.54 |
| ARHGAP30 | FGR | 9606.ENSP00000356992 | 9606.ENSP00000363117 | 0.532 | 0.548 |
| ARHGAP30 | TNFAIP8L2 | 9606.ENSP00000356992 | 9606.ENSP00000357906 | 0.546 | 0.551 |
| ARHGAP30 | ARHGAP9 | 9606.ENSP00000356992 | 9606.ENSP00000377380 | 0.555 | 0.599 |
| ARHGAP9 | PLEK | 9606.ENSP00000377380 | 9606.ENSP00000234313 | 0.51 | 0.765 |
| ARHGAP9 | S1PR4 | 9606.ENSP00000377380 | 9606.ENSP00000246115 | 0.67 | 0.67 |
| ARHGAP9 | RAC2 | 9606.ENSP00000377380 | 9606.ENSP00000249071 | 0.24 | 0.963 |
| ARHGAP9 | MYO1F | 9606.ENSP00000377380 | 9606.ENSP00000344871 | 0.366 | 0.57 |
| ARHGAP9 | FGR | 9606.ENSP00000377380 | 9606.ENSP00000363117 | 0.538 | 0.573 |
| ARHGAP9 | SLA | 9606.ENSP00000377380 | 9606.ENSP00000394049 | 0.504 | 0.504 |
| ARHGAP9 | NCF4 | 9606.ENSP00000377380 | 9606.ENSP00000380334 | 0.538 | 0.682 |
| ARRDC3 | MCTP2 | 9606.ENSP00000265138 | 9606.ENSP00000350377 | 0 | 0.559 |
| AVIL | VNN2 | 9606.ENSP00000257861 | 9606.ENSP00000322276 | 0 | 0.455 |
| BATF | IL2RB | 9606.ENSP00000286639 | 9606.ENSP00000216223 | 0.155 | 0.425 |
| BATF | SELL | 9606.ENSP00000286639 | 9606.ENSP00000236147 | 0.165 | 0.406 |
| BATF | IKZF3 | 9606.ENSP00000286639 | 9606.ENSP00000344544 | 0.096 | 0.405 |
| BATF | CD244 | 9606.ENSP00000286639 | 9606.ENSP00000357012 | 0.182 | 0.412 |
| BATF | HAVCR2 | 9606.ENSP00000286639 | 9606.ENSP00000312002 | 0.099 | 0.435 |
| BATF | STAT1 | 9606.ENSP00000286639 | 9606.ENSP00000354394 | 0.061 | 0.464 |
| BATF | IKZF1 | 9606.ENSP00000286639 | 9606.ENSP00000331614 | 0.202 | 0.517 |
| BATF | EOMES | 9606.ENSP00000286639 | 9606.ENSP00000388620 | 0 | 0.676 |
| C1orf162 | S1PR4 | 9606.ENSP00000344218 | 9606.ENSP00000246115 | 0.559 | 0.559 |
| C1orf162 | SYNRG | 9606.ENSP00000344218 | 9606.ENSP00000483453 | 0 | 0.429 |
| C1orf162 | FGR | 9606.ENSP00000344218 | 9606.ENSP00000363117 | 0.558 | 0.558 |
| C1orf162 | SLA | 9606.ENSP00000344218 | 9606.ENSP00000394049 | 0.559 | 0.559 |
| CASS4 | PTK2B | 9606.ENSP00000353462 | 9606.ENSP00000380638 | 0 | 0.643 |
| CASS4 | INPP5D | 9606.ENSP00000353462 | 9606.ENSP00000405338 | 0.065 | 0.685 |
| CCDC88B | DOCK8 | 9606.ENSP00000349238 | 9606.ENSP00000394888 | 0.137 | 0.596 |
| CCR2 | SELPLG | 9606.ENSP00000292301 | 9606.ENSP00000228463 | 0.215 | 0.523 |
| CCR2 | SELL | 9606.ENSP00000292301 | 9606.ENSP00000236147 | 0.213 | 0.712 |
| CCR2 | S1PR4 | 9606.ENSP00000292301 | 9606.ENSP00000246115 | 0.213 | 0.921 |
| CCR2 | TLR2 | 9606.ENSP00000292301 | 9606.ENSP00000260010 | 0.14 | 0.769 |
| CCR2 | FYB | 9606.ENSP00000292301 | 9606.ENSP00000427114 | 0.403 | 0.418 |
| CCR2 | CD2 | 9606.ENSP00000292301 | 9606.ENSP00000358490 | 0.337 | 0.428 |
| CCR2 | CD200R1 | 9606.ENSP00000292301 | 9606.ENSP00000311035 | 0.115 | 0.436 |
| CCR2 | STAT1 | 9606.ENSP00000292301 | 9606.ENSP00000354394 | 0.062 | 0.44 |
| CCR2 | MPEG1 | 9606.ENSP00000292301 | 9606.ENSP00000354335 | 0.359 | 0.445 |
| CCR2 | IKZF1 | 9606.ENSP00000292301 | 9606.ENSP00000331614 | 0.405 | 0.451 |
| CCR2 | IL2RG | 9606.ENSP00000292301 | 9606.ENSP00000363318 | 0.311 | 0.457 |
| CCR2 | TLR5 | 9606.ENSP00000292301 | 9606.ENSP00000440643 | 0.07 | 0.526 |
| CCR2 | TLR6 | 9606.ENSP00000292301 | 9606.ENSP00000389600 | 0.109 | 0.545 |
| CCR2 | FCGR2B | 9606.ENSP00000292301 | 9606.ENSP00000351497 | 0.201 | 0.58 |
| CCR2 | MMP9 | 9606.ENSP00000292301 | 9606.ENSP00000361405 | 0.108 | 0.596 |
| CCR2 | TLR8 | 9606.ENSP00000292301 | 9606.ENSP00000312082 | 0.334 | 0.661 |
| CCR2 | JAK3 | 9606.ENSP00000292301 | 9606.ENSP00000391676 | 0.104 | 0.7 |
| CCR2 | ITGAX | 9606.ENSP00000292301 | 9606.ENSP00000454623 | 0.139 | 0.746 |
| CCR2 | PNOC | 9606.ENSP00000292301 | 9606.ENSP00000301908 | 0.098 | 0.905 |
| CCR2 | PTGDR2 | 9606.ENSP00000292301 | 9606.ENSP00000332812 | 0 | 0.906 |
| CCR2 | P2RY14 | 9606.ENSP00000292301 | 9606.ENSP00000308361 | 0.098 | 0.909 |
| CCR2 | OXER1 | 9606.ENSP00000292301 | 9606.ENSP00000367930 | 0.133 | 0.91 |
| CCR2 | CXCR2 | 9606.ENSP00000292301 | 9606.ENSP00000319635 | 0.117 | 0.919 |
| CCR2 | P2RY13 | 9606.ENSP00000292301 | 9606.ENSP00000320376 | 0.227 | 0.922 |
| CCR2 | CXCL16 | 9606.ENSP00000292301 | 9606.ENSP00000293778 | 0.083 | 0.947 |
| CCR2 | CCR5 | 9606.ENSP00000292301 | 9606.ENSP00000292303 | 0.328 | 0.95 |
| CCR5 | IL2RB | 9606.ENSP00000292303 | 9606.ENSP00000216223 | 0.214 | 0.53 |
| CCR5 | SELPLG | 9606.ENSP00000292303 | 9606.ENSP00000228463 | 0.212 | 0.546 |
| CCR5 | PLEK | 9606.ENSP00000292303 | 9606.ENSP00000234313 | 0.456 | 0.49 |
| CCR5 | SELL | 9606.ENSP00000292303 | 9606.ENSP00000236147 | 0.187 | 0.724 |
| CCR5 | S1PR4 | 9606.ENSP00000292303 | 9606.ENSP00000246115 | 0.214 | 0.92 |
| CCR5 | TLR2 | 9606.ENSP00000292303 | 9606.ENSP00000260010 | 0.268 | 0.672 |
| CCR5 | LY75 | 9606.ENSP00000292303 | 9606.ENSP00000263636 | 0.111 | 0.445 |
| CCR5 | CD53 | 9606.ENSP00000292303 | 9606.ENSP00000271324 | 0.332 | 0.425 |
| CCR5 | PSTPIP1 | 9606.ENSP00000292303 | 9606.ENSP00000452746 | 0.246 | 0.404 |
| CCR5 | CD300A | 9606.ENSP00000292303 | 9606.ENSP00000353259 | 0.35 | 0.411 |
| CCR5 | EOMES | 9606.ENSP00000292303 | 9606.ENSP00000388620 | 0.102 | 0.414 |
| CCR5 | FGR | 9606.ENSP00000292303 | 9606.ENSP00000363117 | 0.339 | 0.415 |
| CCR5 | TNFSF13B | 9606.ENSP00000292303 | 9606.ENSP00000365048 | 0.194 | 0.427 |
| CCR5 | MPEG1 | 9606.ENSP00000292303 | 9606.ENSP00000354335 | 0.434 | 0.445 |
| CCR5 | TIGIT | 9606.ENSP00000292303 | 9606.ENSP00000419085 | 0.262 | 0.449 |
| CCR5 | FYB | 9606.ENSP00000292303 | 9606.ENSP00000427114 | 0.377 | 0.475 |
| CCR5 | CD244 | 9606.ENSP00000292303 | 9606.ENSP00000357012 | 0.321 | 0.482 |
| CCR5 | TLR6 | 9606.ENSP00000292303 | 9606.ENSP00000389600 | 0.098 | 0.51 |
| CCR5 | IL2RG | 9606.ENSP00000292303 | 9606.ENSP00000363318 | 0.22 | 0.512 |
| CCR5 | HAVCR2 | 9606.ENSP00000292303 | 9606.ENSP00000312002 | 0.189 | 0.526 |
| CCR5 | TLR5 | 9606.ENSP00000292303 | 9606.ENSP00000440643 | 0.09 | 0.536 |
| CCR5 | MMP9 | 9606.ENSP00000292303 | 9606.ENSP00000361405 | 0.231 | 0.577 |
| CCR5 | LCK | 9606.ENSP00000292303 | 9606.ENSP00000337825 | 0.061 | 0.606 |
| CCR5 | FCGR2B | 9606.ENSP00000292303 | 9606.ENSP00000351497 | 0.322 | 0.608 |
| CCR5 | STAT1 | 9606.ENSP00000292303 | 9606.ENSP00000354394 | 0.063 | 0.626 |
| CCR5 | TLR8 | 9606.ENSP00000292303 | 9606.ENSP00000312082 | 0.426 | 0.716 |
| CCR5 | CD2 | 9606.ENSP00000292303 | 9606.ENSP00000358490 | 0.554 | 0.716 |
| CCR5 | JAK3 | 9606.ENSP00000292303 | 9606.ENSP00000391676 | 0.113 | 0.725 |
| CCR5 | ITGAX | 9606.ENSP00000292303 | 9606.ENSP00000454623 | 0.266 | 0.733 |
| CCR5 | PTK2B | 9606.ENSP00000292303 | 9606.ENSP00000380638 | 0.107 | 0.752 |
| CCR5 | OXER1 | 9606.ENSP00000292303 | 9606.ENSP00000367930 | 0.098 | 0.906 |
| CCR5 | P2RY14 | 9606.ENSP00000292303 | 9606.ENSP00000308361 | 0.161 | 0.913 |
| CCR5 | PNOC | 9606.ENSP00000292303 | 9606.ENSP00000301908 | 0.088 | 0.913 |
| CCR5 | PTGDR2 | 9606.ENSP00000292303 | 9606.ENSP00000332812 | 0 | 0.914 |
| CCR5 | CXCR2 | 9606.ENSP00000292303 | 9606.ENSP00000319635 | 0.108 | 0.918 |
| CCR5 | P2RY13 | 9606.ENSP00000292303 | 9606.ENSP00000320376 | 0.231 | 0.921 |
| CCR5 | CXCL16 | 9606.ENSP00000292303 | 9606.ENSP00000293778 | 0.098 | 0.948 |
| CD2 | IL2RB | 9606.ENSP00000358490 | 9606.ENSP00000216223 | 0.563 | 0.779 |
| CD2 | PLEK | 9606.ENSP00000358490 | 9606.ENSP00000234313 | 0.333 | 0.401 |
| CD2 | SELL | 9606.ENSP00000358490 | 9606.ENSP00000236147 | 0.287 | 0.689 |
| CD2 | S1PR4 | 9606.ENSP00000358490 | 9606.ENSP00000246115 | 0.554 | 0.554 |
| CD2 | LY9 | 9606.ENSP00000358490 | 9606.ENSP00000263285 | 0.144 | 0.66 |
| CD2 | CYTIP | 9606.ENSP00000358490 | 9606.ENSP00000264192 | 0.523 | 0.523 |
| CD2 | CD53 | 9606.ENSP00000358490 | 9606.ENSP00000271324 | 0.37 | 0.723 |
| CD2 | TLR8 | 9606.ENSP00000358490 | 9606.ENSP00000312082 | 0.289 | 0.43 |
| CD2 | IKZF1 | 9606.ENSP00000358490 | 9606.ENSP00000331614 | 0.347 | 0.541 |
| CD2 | LCK | 9606.ENSP00000358490 | 9606.ENSP00000337825 | 0.403 | 0.907 |
| CD2 | FCGR2B | 9606.ENSP00000358490 | 9606.ENSP00000351497 | 0.174 | 0.483 |
| CD2 | CD244 | 9606.ENSP00000358490 | 9606.ENSP00000357012 | 0.347 | 0.687 |
| CD2 | SLAMF6 | 9606.ENSP00000358490 | 9606.ENSP00000357036 | 0.171 | 0.545 |
| CD2 | IGLL5 | 9606.ENSP00000358490 | 9606.ENSP00000431254 | 0.274 | 0.406 |
| CD2 | NCF4 | 9606.ENSP00000358490 | 9606.ENSP00000380334 | 0.282 | 0.407 |
| CD2 | VAV1 | 9606.ENSP00000358490 | 9606.ENSP00000472929 | 0.143 | 0.454 |
| CD2 | LAT | 9606.ENSP00000358490 | 9606.ENSP00000378845 | 0.159 | 0.464 |
| CD2 | TIGIT | 9606.ENSP00000358490 | 9606.ENSP00000419085 | 0.31 | 0.473 |
| CD2 | MS4A1 | 9606.ENSP00000358490 | 9606.ENSP00000433277 | 0.335 | 0.477 |
| CD2 | SLA | 9606.ENSP00000358490 | 9606.ENSP00000394049 | 0.523 | 0.534 |
| CD2 | IL2RG | 9606.ENSP00000358490 | 9606.ENSP00000363318 | 0.347 | 0.573 |
| CD2 | FYB | 9606.ENSP00000358490 | 9606.ENSP00000427114 | 0.523 | 0.608 |
| CD2 | ITGAX | 9606.ENSP00000358490 | 9606.ENSP00000454623 | 0.161 | 0.638 |
| CD2 | PSTPIP1 | 9606.ENSP00000358490 | 9606.ENSP00000452746 | 0.215 | 0.814 |
| CD2 | PRKACB | 9606.ENSP00000358490 | 9606.ENSP00000359719 | 0 | 0.9 |
| CD2 | SYK | 9606.ENSP00000358490 | 9606.ENSP00000364907 | 0.158 | 0.965 |
| CD200R1 | TLR2 | 9606.ENSP00000311035 | 9606.ENSP00000260010 | 0.107 | 0.665 |
| CD200R1 | TLR8 | 9606.ENSP00000311035 | 9606.ENSP00000312082 | 0.194 | 0.421 |
| CD200R1 | ITGAX | 9606.ENSP00000311035 | 9606.ENSP00000454623 | 0.127 | 0.475 |
| CD200R1 | CD300A | 9606.ENSP00000311035 | 9606.ENSP00000353259 | 0.156 | 0.476 |
| CD200R1 | FCGR2B | 9606.ENSP00000311035 | 9606.ENSP00000351497 | 0.157 | 0.476 |
| CD244 | IL2RB | 9606.ENSP00000357012 | 9606.ENSP00000216223 | 0.173 | 0.617 |
| CD244 | PLEK | 9606.ENSP00000357012 | 9606.ENSP00000234313 | 0.473 | 0.473 |
| CD244 | SELL | 9606.ENSP00000357012 | 9606.ENSP00000236147 | 0.359 | 0.617 |
| CD244 | HAVCR2 | 9606.ENSP00000357012 | 9606.ENSP00000312002 | 0.116 | 0.694 |
| CD244 | TLR8 | 9606.ENSP00000357012 | 9606.ENSP00000312082 | 0.346 | 0.417 |
| CD244 | IKZF1 | 9606.ENSP00000357012 | 9606.ENSP00000331614 | 0.35 | 0.421 |
| CD244 | FCGR2B | 9606.ENSP00000357012 | 9606.ENSP00000351497 | 0.271 | 0.439 |
| CD244 | CD300A | 9606.ENSP00000357012 | 9606.ENSP00000353259 | 0.376 | 0.563 |
| CD244 | LAIR1 | 9606.ENSP00000357012 | 9606.ENSP00000375622 | 0.199 | 0.415 |
| CD244 | FRAT1 | 9606.ENSP00000357012 | 9606.ENSP00000360060 | 0.098 | 0.421 |
| CD244 | IL2RG | 9606.ENSP00000357012 | 9606.ENSP00000363318 | 0.327 | 0.43 |
| CD244 | ITGAX | 9606.ENSP00000357012 | 9606.ENSP00000454623 | 0.222 | 0.441 |
| CD244 | TNFRSF9 | 9606.ENSP00000357012 | 9606.ENSP00000478699 | 0 | 0.447 |
| CD244 | EOMES | 9606.ENSP00000357012 | 9606.ENSP00000388620 | 0.08 | 0.465 |
| CD244 | MNDA | 9606.ENSP00000357012 | 9606.ENSP00000357123 | 0.498 | 0.502 |
| CD244 | TIGIT | 9606.ENSP00000357012 | 9606.ENSP00000419085 | 0.1 | 0.503 |
| CD244 | VAV1 | 9606.ENSP00000357012 | 9606.ENSP00000472929 | 0.184 | 0.521 |
| CD244 | LAT | 9606.ENSP00000357012 | 9606.ENSP00000378845 | 0.076 | 0.581 |
| CD244 | INPP5D | 9606.ENSP00000357012 | 9606.ENSP00000405338 | 0.175 | 0.678 |
| CD244 | SLAMF6 | 9606.ENSP00000357012 | 9606.ENSP00000357036 | 0.146 | 0.752 |
| CD300A | PILRA | 9606.ENSP00000353259 | 9606.ENSP00000198536 | 0.212 | 0.482 |
| CD300A | PLEK | 9606.ENSP00000353259 | 9606.ENSP00000234313 | 0.538 | 0.538 |
| CD300A | SELL | 9606.ENSP00000353259 | 9606.ENSP00000236147 | 0.345 | 0.412 |
| CD300A | CYBA | 9606.ENSP00000353259 | 9606.ENSP00000261623 | 0.119 | 0.908 |
| CD300A | CD53 | 9606.ENSP00000353259 | 9606.ENSP00000271324 | 0.53 | 0.95 |
| CD300A | CLEC4D | 9606.ENSP00000353259 | 9606.ENSP00000299665 | 0.23 | 0.931 |
| CD300A | TLR8 | 9606.ENSP00000353259 | 9606.ENSP00000312082 | 0.333 | 0.401 |
| CD300A | IKZF1 | 9606.ENSP00000353259 | 9606.ENSP00000331614 | 0.382 | 0.414 |
| CD300A | FCGR2B | 9606.ENSP00000353259 | 9606.ENSP00000351497 | 0.317 | 0.506 |
| CD300A | TIGIT | 9606.ENSP00000353259 | 9606.ENSP00000419085 | 0.076 | 0.409 |
| CD300A | PIK3R6 | 9606.ENSP00000353259 | 9606.ENSP00000480157 | 0.425 | 0.424 |
| CD300A | MNDA | 9606.ENSP00000353259 | 9606.ENSP00000357123 | 0.433 | 0.433 |
| CD300A | CD72 | 9606.ENSP00000353259 | 9606.ENSP00000379980 | 0.105 | 0.439 |
| CD300A | FGR | 9606.ENSP00000353259 | 9606.ENSP00000363117 | 0.441 | 0.455 |
| CD300A | INPP5D | 9606.ENSP00000353259 | 9606.ENSP00000405338 | 0.228 | 0.538 |
| CD300A | PTAFR | 9606.ENSP00000353259 | 9606.ENSP00000362965 | 0.16 | 0.912 |
| CD300A | TRPM2 | 9606.ENSP00000353259 | 9606.ENSP00000381023 | 0.173 | 0.913 |
| CD300A | ITGAX | 9606.ENSP00000353259 | 9606.ENSP00000454623 | 0.266 | 0.933 |
| CD300A | LAIR1 | 9606.ENSP00000353259 | 9606.ENSP00000375622 | 0.226 | 0.961 |
| CD53 | STK10 | 9606.ENSP00000271324 | 9606.ENSP00000176763 | 0.088 | 0.904 |
| CD53 | PLEK | 9606.ENSP00000271324 | 9606.ENSP00000234313 | 0.729 | 0.756 |
| CD53 | SELL | 9606.ENSP00000271324 | 9606.ENSP00000236147 | 0.419 | 0.508 |
| CD53 | S1PR4 | 9606.ENSP00000271324 | 9606.ENSP00000246115 | 0.524 | 0.524 |
| CD53 | EVI2A | 9606.ENSP00000271324 | 9606.ENSP00000247270 | 0.453 | 0.515 |
| CD53 | CYTH4 | 9606.ENSP00000271324 | 9606.ENSP00000248901 | 0.534 | 0.534 |
| CD53 | RAC2 | 9606.ENSP00000271324 | 9606.ENSP00000249071 | 0.555 | 0.613 |
| CD53 | CYBA | 9606.ENSP00000271324 | 9606.ENSP00000261623 | 0.13 | 0.918 |
| CD53 | CYTIP | 9606.ENSP00000271324 | 9606.ENSP00000264192 | 0.677 | 0.677 |
| CD53 | PIK3R6 | 9606.ENSP00000271324 | 9606.ENSP00000480157 | 0.411 | 0.41 |
| CD53 | RASAL3 | 9606.ENSP00000271324 | 9606.ENSP00000341905 | 0.499 | 0.499 |
| CD53 | FCGR2B | 9606.ENSP00000271324 | 9606.ENSP00000351497 | 0.37 | 0.505 |
| CD53 | FERMT3 | 9606.ENSP00000271324 | 9606.ENSP00000279227 | 0.523 | 0.523 |
| CD53 | VAV1 | 9606.ENSP00000271324 | 9606.ENSP00000472929 | 0.471 | 0.524 |
| CD53 | FGR | 9606.ENSP00000271324 | 9606.ENSP00000363117 | 0.527 | 0.527 |
| CD53 | NCF4 | 9606.ENSP00000271324 | 9606.ENSP00000380334 | 0.535 | 0.557 |
| CD53 | IKZF1 | 9606.ENSP00000271324 | 9606.ENSP00000331614 | 0.525 | 0.564 |
| CD53 | MNDA | 9606.ENSP00000271324 | 9606.ENSP00000357123 | 0.531 | 0.581 |
| CD53 | NCF2 | 9606.ENSP00000271324 | 9606.ENSP00000356505 | 0.536 | 0.582 |
| CD53 | FYB | 9606.ENSP00000271324 | 9606.ENSP00000427114 | 0.553 | 0.591 |
| CD53 | NCKAP1L | 9606.ENSP00000271324 | 9606.ENSP00000293373 | 0.552 | 0.621 |
| CD53 | SLA | 9606.ENSP00000271324 | 9606.ENSP00000394049 | 0.654 | 0.654 |
| CD53 | LCP1 | 9606.ENSP00000271324 | 9606.ENSP00000381581 | 0.674 | 0.696 |
| CD53 | HCLS1 | 9606.ENSP00000271324 | 9606.ENSP00000320176 | 0.756 | 0.769 |
| CD53 | MMP25 | 9606.ENSP00000271324 | 9606.ENSP00000337816 | 0.088 | 0.904 |
| CD53 | RAB37 | 9606.ENSP00000271324 | 9606.ENSP00000376390 | 0.098 | 0.905 |
| CD53 | PTAFR | 9606.ENSP00000271324 | 9606.ENSP00000362965 | 0.169 | 0.913 |
| CD53 | TRPM2 | 9606.ENSP00000271324 | 9606.ENSP00000381023 | 0.179 | 0.914 |
| CD53 | CLEC4D | 9606.ENSP00000271324 | 9606.ENSP00000299665 | 0.194 | 0.917 |
| CD53 | LAIR1 | 9606.ENSP00000271324 | 9606.ENSP00000375622 | 0.214 | 0.924 |
| CD53 | ITGAX | 9606.ENSP00000271324 | 9606.ENSP00000454623 | 0.285 | 0.938 |
| CD72 | FCGR2B | 9606.ENSP00000379980 | 9606.ENSP00000351497 | 0.096 | 0.434 |
| CD72 | FCRLA | 9606.ENSP00000379980 | 9606.ENSP00000356936 | 0.189 | 0.44 |
| CD72 | SYK | 9606.ENSP00000379980 | 9606.ENSP00000364907 | 0.103 | 0.966 |
| CD72 | LAIR1 | 9606.ENSP00000379980 | 9606.ENSP00000375622 | 0.086 | 0.485 |
| CD72 | SEMA4D | 9606.ENSP00000379980 | 9606.ENSP00000416523 | 0.049 | 0.986 |
| CEBPE | STXBP2 | 9606.ENSP00000206513 | 9606.ENSP00000413606 | 0.077 | 0.565 |
| CEBPE | IKZF1 | 9606.ENSP00000206513 | 9606.ENSP00000331614 | 0.184 | 0.725 |
| CLEC4D | STK10 | 9606.ENSP00000299665 | 9606.ENSP00000176763 | 0.065 | 0.902 |
| CLEC4D | TLR2 | 9606.ENSP00000299665 | 9606.ENSP00000260010 | 0.231 | 0.551 |
| CLEC4D | CYBA | 9606.ENSP00000299665 | 9606.ENSP00000261623 | 0.093 | 0.908 |
| CLEC4D | LY75 | 9606.ENSP00000299665 | 9606.ENSP00000263636 | 0.076 | 0.42 |
| CLEC4D | CLEC4E | 9606.ENSP00000299665 | 9606.ENSP00000299663 | 0.35 | 0.439 |
| CLEC4D | VNN1 | 9606.ENSP00000299665 | 9606.ENSP00000356905 | 0.109 | 0.464 |
| CLEC4D | CLEC9A | 9606.ENSP00000299665 | 9606.ENSP00000348074 | 0.098 | 0.554 |
| CLEC4D | SYK | 9606.ENSP00000299665 | 9606.ENSP00000364907 | 0.118 | 0.578 |
| CLEC4D | TLR8 | 9606.ENSP00000299665 | 9606.ENSP00000312082 | 0.465 | 0.63 |
| CLEC4D | RAB37 | 9606.ENSP00000299665 | 9606.ENSP00000376390 | 0.065 | 0.902 |
| CLEC4D | TRPM2 | 9606.ENSP00000299665 | 9606.ENSP00000381023 | 0.078 | 0.903 |
| CLEC4D | MMP25 | 9606.ENSP00000299665 | 9606.ENSP00000337816 | 0.139 | 0.91 |
| CLEC4D | PTAFR | 9606.ENSP00000299665 | 9606.ENSP00000362965 | 0.157 | 0.912 |
| CLEC4D | LAIR1 | 9606.ENSP00000299665 | 9606.ENSP00000375622 | 0.118 | 0.912 |
| CLEC4D | ITGAX | 9606.ENSP00000299665 | 9606.ENSP00000454623 | 0.198 | 0.934 |
| CLEC4E | TLR2 | 9606.ENSP00000299663 | 9606.ENSP00000260010 | 0.468 | 0.806 |
| CLEC4E | ITGAX | 9606.ENSP00000299663 | 9606.ENSP00000454623 | 0.164 | 0.424 |
| CLEC4E | TLR5 | 9606.ENSP00000299663 | 9606.ENSP00000440643 | 0.09 | 0.569 |
| CLEC4E | TLR6 | 9606.ENSP00000299663 | 9606.ENSP00000389600 | 0.084 | 0.572 |
| CLEC4E | TLR8 | 9606.ENSP00000299663 | 9606.ENSP00000312082 | 0.248 | 0.644 |
| CLEC4E | SYK | 9606.ENSP00000299663 | 9606.ENSP00000364907 | 0.128 | 0.97 |
| CLEC9A | TLR2 | 9606.ENSP00000348074 | 9606.ENSP00000260010 | 0.087 | 0.477 |
| CLEC9A | LY75 | 9606.ENSP00000348074 | 9606.ENSP00000263636 | 0.065 | 0.77 |
| CLEC9A | TLR8 | 9606.ENSP00000348074 | 9606.ENSP00000312082 | 0.181 | 0.533 |
| CLEC9A | TLR6 | 9606.ENSP00000348074 | 9606.ENSP00000389600 | 0.061 | 0.413 |
| CLEC9A | TLR5 | 9606.ENSP00000348074 | 9606.ENSP00000440643 | 0.061 | 0.44 |
| CLEC9A | SYK | 9606.ENSP00000348074 | 9606.ENSP00000364907 | 0.066 | 0.504 |
| CLEC9A | ITGAX | 9606.ENSP00000348074 | 9606.ENSP00000454623 | 0.101 | 0.656 |
| CSF2RA | IL2RB | 9606.ENSP00000394227 | 9606.ENSP00000216223 | 0.194 | 0.937 |
| CSF2RA | IKZF1 | 9606.ENSP00000394227 | 9606.ENSP00000331614 | 0.208 | 0.47 |
| CSF2RA | STAT1 | 9606.ENSP00000394227 | 9606.ENSP00000354394 | 0 | 0.946 |
| CSF2RA | PRKACB | 9606.ENSP00000394227 | 9606.ENSP00000359719 | 0 | 0.904 |
| CSF2RA | IL2RG | 9606.ENSP00000394227 | 9606.ENSP00000363318 | 0.161 | 0.935 |
| CSF2RA | SYK | 9606.ENSP00000394227 | 9606.ENSP00000364907 | 0.119 | 0.912 |
| CSF2RA | PIK3CD | 9606.ENSP00000394227 | 9606.ENSP00000366563 | 0.084 | 0.904 |
| CSF2RA | JAK3 | 9606.ENSP00000394227 | 9606.ENSP00000391676 | 0.076 | 0.924 |
| CSF2RA | ITGAX | 9606.ENSP00000394227 | 9606.ENSP00000454623 | 0.258 | 0.536 |
| CSF2RA | INPP5D | 9606.ENSP00000394227 | 9606.ENSP00000405338 | 0.088 | 0.909 |
| CXCL16 | S1PR4 | 9606.ENSP00000293778 | 9606.ENSP00000246115 | 0 | 0.9 |
| CXCL16 | TLR2 | 9606.ENSP00000293778 | 9606.ENSP00000260010 | 0.172 | 0.548 |
| CXCL16 | ITGAX | 9606.ENSP00000293778 | 9606.ENSP00000454623 | 0.123 | 0.431 |
| CXCL16 | MMP9 | 9606.ENSP00000293778 | 9606.ENSP00000361405 | 0.077 | 0.465 |
| CXCL16 | OXER1 | 9606.ENSP00000293778 | 9606.ENSP00000367930 | 0 | 0.9 |
| CXCL16 | PNOC | 9606.ENSP00000293778 | 9606.ENSP00000301908 | 0 | 0.9 |
| CXCL16 | PTGDR2 | 9606.ENSP00000293778 | 9606.ENSP00000332812 | 0 | 0.9 |
| CXCL16 | P2RY14 | 9606.ENSP00000293778 | 9606.ENSP00000308361 | 0.061 | 0.902 |
| CXCL16 | P2RY13 | 9606.ENSP00000293778 | 9606.ENSP00000320376 | 0.086 | 0.908 |
| CXCL16 | CXCR2 | 9606.ENSP00000293778 | 9606.ENSP00000319635 | 0 | 0.945 |
| CXCR2 | SELPLG | 9606.ENSP00000319635 | 9606.ENSP00000228463 | 0.073 | 0.46 |
| CXCR2 | SELL | 9606.ENSP00000319635 | 9606.ENSP00000236147 | 0.181 | 0.619 |
| CXCR2 | S1PR4 | 9606.ENSP00000319635 | 9606.ENSP00000246115 | 0.254 | 0.932 |
| CXCR2 | TLR2 | 9606.ENSP00000319635 | 9606.ENSP00000260010 | 0.136 | 0.588 |
| CXCR2 | PNOC | 9606.ENSP00000319635 | 9606.ENSP00000301908 | 0 | 0.9 |
| CXCR2 | P2RY14 | 9606.ENSP00000319635 | 9606.ENSP00000308361 | 0.076 | 0.903 |
| CXCR2 | TLR8 | 9606.ENSP00000319635 | 9606.ENSP00000312082 | 0.182 | 0.505 |
| CXCR2 | TLR6 | 9606.ENSP00000319635 | 9606.ENSP00000389600 | 0.072 | 0.433 |
| CXCR2 | TLR5 | 9606.ENSP00000319635 | 9606.ENSP00000440643 | 0.089 | 0.457 |
| CXCR2 | ITGAX | 9606.ENSP00000319635 | 9606.ENSP00000454623 | 0.156 | 0.537 |
| CXCR2 | VNN2 | 9606.ENSP00000319635 | 9606.ENSP00000322276 | 0.545 | 0.591 |
| CXCR2 | MMP9 | 9606.ENSP00000319635 | 9606.ENSP00000361405 | 0.089 | 0.608 |
| CXCR2 | JAK3 | 9606.ENSP00000319635 | 9606.ENSP00000391676 | 0.077 | 0.667 |
| CXCR2 | OXER1 | 9606.ENSP00000319635 | 9606.ENSP00000367930 | 0.069 | 0.903 |
| CXCR2 | PTGDR2 | 9606.ENSP00000319635 | 9606.ENSP00000332812 | 0 | 0.905 |
| CXCR2 | P2RY13 | 9606.ENSP00000319635 | 9606.ENSP00000320376 | 0.172 | 0.915 |
| CYBA | STK10 | 9606.ENSP00000261623 | 9606.ENSP00000176763 | 0.088 | 0.904 |
| CYBA | RAC2 | 9606.ENSP00000261623 | 9606.ENSP00000249071 | 0.229 | 0.974 |
| CYBA | MMP9 | 9606.ENSP00000261623 | 9606.ENSP00000361405 | 0.108 | 0.763 |
| CYBA | RAB37 | 9606.ENSP00000261623 | 9606.ENSP00000376390 | 0 | 0.9 |
| CYBA | PTAFR | 9606.ENSP00000261623 | 9606.ENSP00000362965 | 0.062 | 0.902 |
| CYBA | LAIR1 | 9606.ENSP00000261623 | 9606.ENSP00000375622 | 0.086 | 0.904 |
| CYBA | MMP25 | 9606.ENSP00000261623 | 9606.ENSP00000337816 | 0.097 | 0.907 |
| CYBA | TRPM2 | 9606.ENSP00000261623 | 9606.ENSP00000381023 | 0.065 | 0.909 |
| CYBA | ITGAX | 9606.ENSP00000261623 | 9606.ENSP00000454623 | 0.081 | 0.914 |
| CYBA | VAV1 | 9606.ENSP00000261623 | 9606.ENSP00000472929 | 0.15 | 0.92 |
| CYBA | NCF4 | 9606.ENSP00000261623 | 9606.ENSP00000380334 | 0.175 | 0.994 |
| CYBA | NCF2 | 9606.ENSP00000261623 | 9606.ENSP00000356505 | 0.159 | 0.997 |
| CYTH4 | PLEK | 9606.ENSP00000248901 | 9606.ENSP00000234313 | 0.687 | 0.738 |
| CYTH4 | S1PR4 | 9606.ENSP00000248901 | 9606.ENSP00000246115 | 0.55 | 0.55 |
| CYTH4 | CYTIP | 9606.ENSP00000248901 | 9606.ENSP00000264192 | 0.37 | 0.409 |
| CYTH4 | KLHL6 | 9606.ENSP00000248901 | 9606.ENSP00000341342 | 0.307 | 0.431 |
| CYTH4 | RAC2 | 9606.ENSP00000248901 | 9606.ENSP00000249071 | 0.286 | 0.463 |
| CYTH4 | SLA | 9606.ENSP00000248901 | 9606.ENSP00000394049 | 0.468 | 0.468 |
| CYTH4 | TNFAIP8L2 | 9606.ENSP00000248901 | 9606.ENSP00000357906 | 0.475 | 0.475 |
| CYTH4 | MCTP2 | 9606.ENSP00000248901 | 9606.ENSP00000350377 | 0.065 | 0.487 |
| CYTH4 | IL2RG | 9606.ENSP00000248901 | 9606.ENSP00000363318 | 0.519 | 0.519 |
| CYTH4 | NCF4 | 9606.ENSP00000248901 | 9606.ENSP00000380334 | 0.536 | 0.536 |
| CYTH4 | FYB | 9606.ENSP00000248901 | 9606.ENSP00000427114 | 0.546 | 0.546 |
| CYTH4 | ITGAX | 9606.ENSP00000248901 | 9606.ENSP00000454623 | 0.546 | 0.546 |
| CYTH4 | IKZF1 | 9606.ENSP00000248901 | 9606.ENSP00000331614 | 0.579 | 0.579 |
| CYTH4 | NCKAP1L | 9606.ENSP00000248901 | 9606.ENSP00000293373 | 0.295 | 0.599 |
| CYTH4 | FGR | 9606.ENSP00000248901 | 9606.ENSP00000363117 | 0.545 | 0.613 |
| CYTH4 | MPEG1 | 9606.ENSP00000248901 | 9606.ENSP00000354335 | 0.614 | 0.614 |
| CYTH4 | LY9 | 9606.ENSP00000248901 | 9606.ENSP00000263285 | 0.605 | 0.621 |
| CYTH4 | MYO1F | 9606.ENSP00000248901 | 9606.ENSP00000344871 | 0.679 | 0.685 |
| CYTIP | IL2RB | 9606.ENSP00000264192 | 9606.ENSP00000216223 | 0.558 | 0.558 |
| CYTIP | PLEK | 9606.ENSP00000264192 | 9606.ENSP00000234313 | 0.557 | 0.597 |
| CYTIP | S1PR4 | 9606.ENSP00000264192 | 9606.ENSP00000246115 | 0.536 | 0.536 |
| CYTIP | LY9 | 9606.ENSP00000264192 | 9606.ENSP00000263285 | 0.539 | 0.543 |
| CYTIP | RASAL3 | 9606.ENSP00000264192 | 9606.ENSP00000341905 | 0.4 | 0.414 |
| CYTIP | IKZF1 | 9606.ENSP00000264192 | 9606.ENSP00000331614 | 0.425 | 0.432 |
| CYTIP | FGR | 9606.ENSP00000264192 | 9606.ENSP00000363117 | 0.333 | 0.433 |
| CYTIP | IKBKE | 9606.ENSP00000264192 | 9606.ENSP00000464030 | 0.116 | 0.438 |
| CYTIP | INPP5D | 9606.ENSP00000264192 | 9606.ENSP00000405338 | 0.453 | 0.468 |
| CYTIP | KLHL6 | 9606.ENSP00000264192 | 9606.ENSP00000341342 | 0.281 | 0.485 |
| CYTIP | FYB | 9606.ENSP00000264192 | 9606.ENSP00000427114 | 0.492 | 0.492 |
| CYTIP | SLA | 9606.ENSP00000264192 | 9606.ENSP00000394049 | 0.529 | 0.529 |
| CYTIP | HCLS1 | 9606.ENSP00000264192 | 9606.ENSP00000320176 | 0.534 | 0.534 |
| DOCK8 | PLEK | 9606.ENSP00000394888 | 9606.ENSP00000234313 | 0.405 | 0.515 |
| DOCK8 | RAC2 | 9606.ENSP00000394888 | 9606.ENSP00000249071 | 0.172 | 0.643 |
| DOCK8 | LY9 | 9606.ENSP00000394888 | 9606.ENSP00000263285 | 0.546 | 0.546 |
| DOCK8 | NCKAP1L | 9606.ENSP00000394888 | 9606.ENSP00000293373 | 0.327 | 0.5 |
| DOCK8 | IKZF1 | 9606.ENSP00000394888 | 9606.ENSP00000331614 | 0.53 | 0.549 |
| DOCK8 | IL2RG | 9606.ENSP00000394888 | 9606.ENSP00000363318 | 0.297 | 0.434 |
| DOCK8 | FGD3 | 9606.ENSP00000394888 | 9606.ENSP00000364631 | 0.161 | 0.418 |
| DOCK8 | WIPF1 | 9606.ENSP00000394888 | 9606.ENSP00000376330 | 0.123 | 0.542 |
| DOCK8 | PTK2B | 9606.ENSP00000394888 | 9606.ENSP00000380638 | 0.139 | 0.671 |
| DOCK8 | VAV1 | 9606.ENSP00000394888 | 9606.ENSP00000472929 | 0.214 | 0.498 |
| DOCK8 | FYB | 9606.ENSP00000394888 | 9606.ENSP00000427114 | 0.365 | 0.519 |
| DOK3 | PLEK | 9606.ENSP00000349727 | 9606.ENSP00000234313 | 0.325 | 0.57 |
| DOK3 | LCK | 9606.ENSP00000349727 | 9606.ENSP00000337825 | 0.088 | 0.564 |
| DOK3 | VAV1 | 9606.ENSP00000349727 | 9606.ENSP00000472929 | 0.228 | 0.407 |
| DOK3 | SYK | 9606.ENSP00000349727 | 9606.ENSP00000364907 | 0.172 | 0.56 |
| DOK3 | INPP5D | 9606.ENSP00000349727 | 9606.ENSP00000405338 | 0.155 | 0.801 |
| DUSP18 | PTAFR | 9606.ENSP00000333917 | 9606.ENSP00000362965 | 0 | 0.48 |
| EOMES | IL2RB | 9606.ENSP00000388620 | 9606.ENSP00000216223 | 0.119 | 0.815 |
| EOMES | SELL | 9606.ENSP00000388620 | 9606.ENSP00000236147 | 0.063 | 0.605 |
| EOMES | HAVCR2 | 9606.ENSP00000388620 | 9606.ENSP00000312002 | 0.061 | 0.535 |
| EOMES | STAT1 | 9606.ENSP00000388620 | 9606.ENSP00000354394 | 0 | 0.412 |
| EOMES | TIGIT | 9606.ENSP00000388620 | 9606.ENSP00000419085 | 0.122 | 0.46 |
| EOMES | TNFRSF9 | 9606.ENSP00000388620 | 9606.ENSP00000478699 | 0 | 0.707 |
| EPB41 | PLEK | 9606.ENSP00000345259 | 9606.ENSP00000234313 | 0.073 | 0.534 |
| EPB41 | TACC3 | 9606.ENSP00000345259 | 9606.ENSP00000326550 | 0 | 0.422 |
| EPSTI1 | RTP4 | 9606.ENSP00000318982 | 9606.ENSP00000259030 | 0.288 | 0.463 |
| EPSTI1 | IFIH1 | 9606.ENSP00000318982 | 9606.ENSP00000263642 | 0.317 | 0.44 |
| EPSTI1 | STAT1 | 9606.ENSP00000318982 | 9606.ENSP00000354394 | 0.339 | 0.525 |
| EPSTI1 | XAF1 | 9606.ENSP00000318982 | 9606.ENSP00000354822 | 0.274 | 0.539 |
| EPSTI1 | SAMD9L | 9606.ENSP00000318982 | 9606.ENSP00000326247 | 0.478 | 0.695 |
| F13A1 | PLEK | 9606.ENSP00000264870 | 9606.ENSP00000234313 | 0.42 | 0.595 |
| F13A1 | MS4A7 | 9606.ENSP00000264870 | 9606.ENSP00000300184 | 0.411 | 0.41 |
| F13A1 | MNDA | 9606.ENSP00000264870 | 9606.ENSP00000357123 | 0.39 | 0.413 |
| F13A1 | MAFB | 9606.ENSP00000264870 | 9606.ENSP00000362410 | 0.183 | 0.462 |
| F13A1 | FERMT3 | 9606.ENSP00000264870 | 9606.ENSP00000279227 | 0.134 | 0.913 |
| FCGR2B | IL2RB | 9606.ENSP00000351497 | 9606.ENSP00000216223 | 0.112 | 0.487 |
| FCGR2B | PLEK | 9606.ENSP00000351497 | 9606.ENSP00000234313 | 0.533 | 0.567 |
| FCGR2B | SELL | 9606.ENSP00000351497 | 9606.ENSP00000236147 | 0.212 | 0.735 |
| FCGR2B | LILRA2 | 9606.ENSP00000351497 | 9606.ENSP00000251377 | 0.116 | 0.829 |
| FCGR2B | TLR2 | 9606.ENSP00000351497 | 9606.ENSP00000260010 | 0.229 | 0.626 |
| FCGR2B | LY75 | 9606.ENSP00000351497 | 9606.ENSP00000263636 | 0.126 | 0.527 |
| FCGR2B | HAVCR2 | 9606.ENSP00000351497 | 9606.ENSP00000312002 | 0.142 | 0.418 |
| FCGR2B | TLR8 | 9606.ENSP00000351497 | 9606.ENSP00000312082 | 0.341 | 0.615 |
| FCGR2B | LCK | 9606.ENSP00000351497 | 9606.ENSP00000337825 | 0.07 | 0.419 |
| FCGR2B | MS4A1 | 9606.ENSP00000351497 | 9606.ENSP00000433277 | 0.299 | 0.409 |
| FCGR2B | TLR6 | 9606.ENSP00000351497 | 9606.ENSP00000389600 | 0.098 | 0.435 |
| FCGR2B | FCRLA | 9606.ENSP00000351497 | 9606.ENSP00000356936 | 0.175 | 0.435 |
| FCGR2B | FGR | 9606.ENSP00000351497 | 9606.ENSP00000363117 | 0.347 | 0.436 |
| FCGR2B | NCF4 | 9606.ENSP00000351497 | 9606.ENSP00000380334 | 0.349 | 0.447 |
| FCGR2B | HLA-DQB1 | 9606.ENSP00000351497 | 9606.ENSP00000364080 | 0.196 | 0.48 |
| FCGR2B | TLR5 | 9606.ENSP00000351497 | 9606.ENSP00000440643 | 0.1 | 0.481 |
| FCGR2B | MNDA | 9606.ENSP00000351497 | 9606.ENSP00000357123 | 0.448 | 0.495 |
| FCGR2B | TNFSF13B | 9606.ENSP00000351497 | 9606.ENSP00000365048 | 0.137 | 0.496 |
| FCGR2B | MPEG1 | 9606.ENSP00000351497 | 9606.ENSP00000354335 | 0.389 | 0.498 |
| FCGR2B | NCF2 | 9606.ENSP00000351497 | 9606.ENSP00000356505 | 0.384 | 0.527 |
| FCGR2B | SYK | 9606.ENSP00000351497 | 9606.ENSP00000364907 | 0.175 | 0.818 |
| FCGR2B | ITGAX | 9606.ENSP00000351497 | 9606.ENSP00000454623 | 0.248 | 0.847 |
| FCGR2B | IGLL5 | 9606.ENSP00000351497 | 9606.ENSP00000431254 | 0.21 | 0.936 |
| FCGR2B | INPP5D | 9606.ENSP00000351497 | 9606.ENSP00000405338 | 0.167 | 0.974 |
| FCHO1 | MYO1F | 9606.ENSP00000473001 | 9606.ENSP00000344871 | 0.078 | 0.416 |
| FCHO1 | WIPF1 | 9606.ENSP00000473001 | 9606.ENSP00000376330 | 0 | 0.4 |
| FCHO1 | FNBP1 | 9606.ENSP00000473001 | 9606.ENSP00000413625 | 0.061 | 0.979 |
| FCHO1 | SRGAP2 | 9606.ENSP00000473001 | 9606.ENSP00000459615 | 0.061 | 0.437 |
| FCRLA | MS4A1 | 9606.ENSP00000356936 | 9606.ENSP00000433277 | 0.552 | 0.677 |
| FERMT3 | SELPLG | 9606.ENSP00000279227 | 9606.ENSP00000228463 | 0.306 | 0.565 |
| FERMT3 | PLEK | 9606.ENSP00000279227 | 9606.ENSP00000234313 | 0.502 | 0.744 |
| FERMT3 | SELL | 9606.ENSP00000279227 | 9606.ENSP00000236147 | 0.231 | 0.477 |
| FERMT3 | RAC2 | 9606.ENSP00000279227 | 9606.ENSP00000249071 | 0.614 | 0.705 |
| FERMT3 | LSP1 | 9606.ENSP00000279227 | 9606.ENSP00000371194 | 0.37 | 0.404 |
| FERMT3 | NCKAP1L | 9606.ENSP00000279227 | 9606.ENSP00000293373 | 0.343 | 0.418 |
| FERMT3 | FGR | 9606.ENSP00000279227 | 9606.ENSP00000363117 | 0.303 | 0.432 |
| FERMT3 | SYK | 9606.ENSP00000279227 | 9606.ENSP00000364907 | 0.192 | 0.468 |
| FERMT3 | VAV1 | 9606.ENSP00000279227 | 9606.ENSP00000472929 | 0.284 | 0.498 |
| FERMT3 | NCF4 | 9606.ENSP00000279227 | 9606.ENSP00000380334 | 0.475 | 0.502 |
| FERMT3 | FYB | 9606.ENSP00000279227 | 9606.ENSP00000427114 | 0.289 | 0.573 |
| FERMT3 | HCLS1 | 9606.ENSP00000279227 | 9606.ENSP00000320176 | 0.583 | 0.583 |
| FERMT3 | LPXN | 9606.ENSP00000279227 | 9606.ENSP00000431284 | 0.219 | 0.812 |
| FERMT3 | LCP1 | 9606.ENSP00000279227 | 9606.ENSP00000381581 | 0.345 | 0.853 |
| FGD3 | PLEK | 9606.ENSP00000364631 | 9606.ENSP00000234313 | 0.271 | 0.466 |
| FGD3 | RAC2 | 9606.ENSP00000364631 | 9606.ENSP00000249071 | 0.176 | 0.934 |
| FGD3 | SUSD3 | 9606.ENSP00000364631 | 9606.ENSP00000364621 | 0.23 | 0.551 |
| FGR | SELPLG | 9606.ENSP00000363117 | 9606.ENSP00000228463 | 0.327 | 0.519 |
| FGR | PLEK | 9606.ENSP00000363117 | 9606.ENSP00000234313 | 0.673 | 0.76 |
| FGR | SELL | 9606.ENSP00000363117 | 9606.ENSP00000236147 | 0.351 | 0.478 |
| FGR | S1PR4 | 9606.ENSP00000363117 | 9606.ENSP00000246115 | 0.558 | 0.558 |
| FGR | RAC2 | 9606.ENSP00000363117 | 9606.ENSP00000249071 | 0.227 | 0.513 |
| FGR | TLR2 | 9606.ENSP00000363117 | 9606.ENSP00000260010 | 0.558 | 0.684 |
| FGR | TLR8 | 9606.ENSP00000363117 | 9606.ENSP00000312082 | 0.532 | 0.638 |
| FGR | HCLS1 | 9606.ENSP00000363117 | 9606.ENSP00000320176 | 0.534 | 0.804 |
| FGR | P2RY13 | 9606.ENSP00000363117 | 9606.ENSP00000320376 | 0.5 | 0.525 |
| FGR | VNN2 | 9606.ENSP00000363117 | 9606.ENSP00000322276 | 0.523 | 0.523 |
| FGR | LCK | 9606.ENSP00000363117 | 9606.ENSP00000337825 | 0.069 | 0.906 |
| FGR | MYO1F | 9606.ENSP00000363117 | 9606.ENSP00000344871 | 0.552 | 0.562 |
| FGR | MPEG1 | 9606.ENSP00000363117 | 9606.ENSP00000354335 | 0.456 | 0.457 |
| FGR | NCF2 | 9606.ENSP00000363117 | 9606.ENSP00000356505 | 0.645 | 0.681 |
| FGR | MNDA | 9606.ENSP00000363117 | 9606.ENSP00000357123 | 0.771 | 0.771 |
| FGR | TNFAIP8L2 | 9606.ENSP00000363117 | 9606.ENSP00000357906 | 0.539 | 0.539 |
| FGR | PSTPIP1 | 9606.ENSP00000363117 | 9606.ENSP00000452746 | 0.278 | 0.402 |
| FGR | VAV1 | 9606.ENSP00000363117 | 9606.ENSP00000472929 | 0.171 | 0.455 |
| FGR | FYB | 9606.ENSP00000363117 | 9606.ENSP00000427114 | 0.339 | 0.508 |
| FGR | NCF4 | 9606.ENSP00000363117 | 9606.ENSP00000380334 | 0.521 | 0.562 |
| FGR | INPP5D | 9606.ENSP00000363117 | 9606.ENSP00000405338 | 0.182 | 0.62 |
| FGR | ITGAX | 9606.ENSP00000363117 | 9606.ENSP00000454623 | 0.562 | 0.639 |
| FGR | PIK3CD | 9606.ENSP00000363117 | 9606.ENSP00000366563 | 0.15 | 0.705 |
| FGR | IGLL5 | 9606.ENSP00000363117 | 9606.ENSP00000431254 | 0.213 | 0.929 |
| FGR | LAT | 9606.ENSP00000363117 | 9606.ENSP00000378845 | 0.065 | 0.93 |
| FGR | PTK2B | 9606.ENSP00000363117 | 9606.ENSP00000380638 | 0.152 | 0.93 |
| FGR | SLA | 9606.ENSP00000363117 | 9606.ENSP00000394049 | 0.56 | 0.956 |
| FGR | SYK | 9606.ENSP00000363117 | 9606.ENSP00000364907 | 0.228 | 0.964 |
| FNBP1 | MYO1F | 9606.ENSP00000413625 | 9606.ENSP00000344871 | 0.063 | 0.459 |
| FNBP1 | WIPF1 | 9606.ENSP00000413625 | 9606.ENSP00000376330 | 0.069 | 0.531 |
| FNBP1 | SRGAP2 | 9606.ENSP00000413625 | 9606.ENSP00000459615 | 0.063 | 0.618 |
| FNBP1 | PSTPIP1 | 9606.ENSP00000413625 | 9606.ENSP00000452746 | 0.061 | 0.74 |
| FYB | IL2RB | 9606.ENSP00000427114 | 9606.ENSP00000216223 | 0.528 | 0.553 |
| FYB | SELPLG | 9606.ENSP00000427114 | 9606.ENSP00000228463 | 0.332 | 0.434 |
| FYB | NCK2 | 9606.ENSP00000427114 | 9606.ENSP00000233154 | 0 | 0.704 |
| FYB | PLEK | 9606.ENSP00000427114 | 9606.ENSP00000234313 | 0.701 | 0.79 |
| FYB | SELL | 9606.ENSP00000427114 | 9606.ENSP00000236147 | 0.352 | 0.423 |
| FYB | RAC2 | 9606.ENSP00000427114 | 9606.ENSP00000249071 | 0.318 | 0.438 |
| FYB | TLR2 | 9606.ENSP00000427114 | 9606.ENSP00000260010 | 0.261 | 0.4 |
| FYB | LY9 | 9606.ENSP00000427114 | 9606.ENSP00000263285 | 0.575 | 0.597 |
| FYB | NCKAP1L | 9606.ENSP00000427114 | 9606.ENSP00000293373 | 0.331 | 0.471 |
| FYB | HCLS1 | 9606.ENSP00000427114 | 9606.ENSP00000320176 | 0.554 | 0.559 |
| FYB | IKZF1 | 9606.ENSP00000427114 | 9606.ENSP00000331614 | 0.613 | 0.613 |
| FYB | LCK | 9606.ENSP00000427114 | 9606.ENSP00000337825 | 0.107 | 0.682 |
| FYB | RASAL3 | 9606.ENSP00000427114 | 9606.ENSP00000341905 | 0.332 | 0.437 |
| FYB | MPEG1 | 9606.ENSP00000427114 | 9606.ENSP00000354335 | 0.61 | 0.61 |
| FYB | MNDA | 9606.ENSP00000427114 | 9606.ENSP00000357123 | 0.386 | 0.428 |
| FYB | IL2RG | 9606.ENSP00000427114 | 9606.ENSP00000363318 | 0.405 | 0.408 |
| FYB | SYK | 9606.ENSP00000427114 | 9606.ENSP00000364907 | 0.172 | 0.517 |
| FYB | LAT | 9606.ENSP00000427114 | 9606.ENSP00000378845 | 0.107 | 0.954 |
| FYB | PTK2B | 9606.ENSP00000427114 | 9606.ENSP00000380638 | 0.145 | 0.5 |
| FYB | LCP1 | 9606.ENSP00000427114 | 9606.ENSP00000381581 | 0.393 | 0.528 |
| FYB | SLA | 9606.ENSP00000427114 | 9606.ENSP00000394049 | 0.549 | 0.57 |
| FYB | PIK3R6 | 9606.ENSP00000427114 | 9606.ENSP00000480157 | 0.266 | 0.418 |
| FYB | VAV1 | 9606.ENSP00000427114 | 9606.ENSP00000472929 | 0.229 | 0.711 |
| GALNT6 | TRIM66 | 9606.ENSP00000444171 | 9606.ENSP00000384876 | 0 | 0.532 |
| GALNT6 | GCNT1 | 9606.ENSP00000444171 | 9606.ENSP00000415454 | 0.061 | 0.807 |
| GAPT | P2RY13 | 9606.ENSP00000379997 | 9606.ENSP00000320376 | 0.463 | 0.463 |
| GAPT | MNDA | 9606.ENSP00000379997 | 9606.ENSP00000357123 | 0.447 | 0.532 |
| GAPT | TNFAIP8L2 | 9606.ENSP00000379997 | 9606.ENSP00000357906 | 0.284 | 0.419 |
| GCNT1 | SELPLG | 9606.ENSP00000415454 | 9606.ENSP00000228463 | 0 | 0.527 |
| GCNT1 | SELL | 9606.ENSP00000415454 | 9606.ENSP00000236147 | 0.061 | 0.458 |
| GDPD3 | PSTPIP1 | 9606.ENSP00000384363 | 9606.ENSP00000452746 | 0 | 0.464 |
| GHRL | UCP2 | 9606.ENSP00000335074 | 9606.ENSP00000312029 | 0 | 0.792 |
| GMIP | NCF4 | 9606.ENSP00000203556 | 9606.ENSP00000380334 | 0.18 | 0.462 |
| GMIP | RAC2 | 9606.ENSP00000203556 | 9606.ENSP00000249071 | 0.189 | 0.932 |
| GPR114 | GPR65 | 9606.ENSP00000342981 | 9606.ENSP00000267549 | 0 | 0.463 |
| GPR114 | P2RY13 | 9606.ENSP00000342981 | 9606.ENSP00000320376 | 0 | 0.404 |
| GPR132 | GPR65 | 9606.ENSP00000328818 | 9606.ENSP00000267549 | 0.27 | 0.936 |
| GPR132 | IKZF1 | 9606.ENSP00000328818 | 9606.ENSP00000331614 | 0.212 | 0.518 |
| GPR132 | PTAFR | 9606.ENSP00000328818 | 9606.ENSP00000362965 | 0.164 | 0.923 |
| GPR65 | PLEK | 9606.ENSP00000267549 | 9606.ENSP00000234313 | 0.604 | 0.61 |
| GPR65 | LY9 | 9606.ENSP00000267549 | 9606.ENSP00000263285 | 0.557 | 0.557 |
| GPR65 | PSTPIP1 | 9606.ENSP00000267549 | 9606.ENSP00000452746 | 0.526 | 0.526 |
| GPR65 | IKZF1 | 9606.ENSP00000267549 | 9606.ENSP00000331614 | 0.545 | 0.557 |
| GPR65 | PTAFR | 9606.ENSP00000267549 | 9606.ENSP00000362965 | 0.233 | 0.92 |
| HAVCR2 | IL2RB | 9606.ENSP00000312002 | 9606.ENSP00000216223 | 0.123 | 0.437 |
| HAVCR2 | SELL | 9606.ENSP00000312002 | 9606.ENSP00000236147 | 0.064 | 0.555 |
| HAVCR2 | TLR2 | 9606.ENSP00000312002 | 9606.ENSP00000260010 | 0.13 | 0.469 |
| HAVCR2 | TLR6 | 9606.ENSP00000312002 | 9606.ENSP00000389600 | 0.088 | 0.402 |
| HAVCR2 | TLR8 | 9606.ENSP00000312002 | 9606.ENSP00000312082 | 0.116 | 0.402 |
| HAVCR2 | TNFSF14 | 9606.ENSP00000312002 | 9606.ENSP00000469049 | 0.092 | 0.405 |
| HAVCR2 | VAV1 | 9606.ENSP00000312002 | 9606.ENSP00000472929 | 0.116 | 0.427 |
| HAVCR2 | SYK | 9606.ENSP00000312002 | 9606.ENSP00000364907 | 0.122 | 0.505 |
| HAVCR2 | ITGAX | 9606.ENSP00000312002 | 9606.ENSP00000454623 | 0.223 | 0.574 |
| HAVCR2 | STAT1 | 9606.ENSP00000312002 | 9606.ENSP00000354394 | 0 | 0.58 |
| HAVCR2 | TNFRSF9 | 9606.ENSP00000312002 | 9606.ENSP00000478699 | 0.088 | 0.715 |
| HAVCR2 | TIGIT | 9606.ENSP00000312002 | 9606.ENSP00000419085 | 0.07 | 0.744 |
| HAVCR2 | LCK | 9606.ENSP00000312002 | 9606.ENSP00000337825 | 0 | 0.748 |
| HCLS1 | PLEK | 9606.ENSP00000320176 | 9606.ENSP00000234313 | 0.618 | 0.644 |
| HCLS1 | SELL | 9606.ENSP00000320176 | 9606.ENSP00000236147 | 0.453 | 0.453 |
| HCLS1 | S1PR4 | 9606.ENSP00000320176 | 9606.ENSP00000246115 | 0.541 | 0.541 |
| HCLS1 | RAC2 | 9606.ENSP00000320176 | 9606.ENSP00000249071 | 0.716 | 0.763 |
| HCLS1 | NCKAP1L | 9606.ENSP00000320176 | 9606.ENSP00000293373 | 0.426 | 0.436 |
| HCLS1 | LRRK2 | 9606.ENSP00000320176 | 9606.ENSP00000298910 | 0.139 | 0.465 |
| HCLS1 | RASAL3 | 9606.ENSP00000320176 | 9606.ENSP00000341905 | 0.417 | 0.417 |
| HCLS1 | NCF2 | 9606.ENSP00000320176 | 9606.ENSP00000356505 | 0.353 | 0.418 |
| HCLS1 | LSP1 | 9606.ENSP00000320176 | 9606.ENSP00000371194 | 0.404 | 0.539 |
| HCLS1 | LCK | 9606.ENSP00000320176 | 9606.ENSP00000337825 | 0.14 | 0.552 |
| HCLS1 | SLA | 9606.ENSP00000320176 | 9606.ENSP00000394049 | 0.554 | 0.559 |
| HCLS1 | NCF4 | 9606.ENSP00000320176 | 9606.ENSP00000380334 | 0.535 | 0.56 |
| HCLS1 | VAV1 | 9606.ENSP00000320176 | 9606.ENSP00000472929 | 0.47 | 0.642 |
| HCLS1 | WIPF1 | 9606.ENSP00000320176 | 9606.ENSP00000376330 | 0.185 | 0.678 |
| HCLS1 | LCP1 | 9606.ENSP00000320176 | 9606.ENSP00000381581 | 0.659 | 0.703 |
| HCLS1 | SYK | 9606.ENSP00000320176 | 9606.ENSP00000364907 | 0.267 | 0.976 |
| HLA-DQB1 | SELL | 9606.ENSP00000364080 | 9606.ENSP00000236147 | 0.152 | 0.495 |
| HLA-DQB1 | HLA-F | 9606.ENSP00000364080 | 9606.ENSP00000259951 | 0.144 | 0.927 |
| HLA-DQB1 | LCK | 9606.ENSP00000364080 | 9606.ENSP00000337825 | 0.088 | 0.931 |
| HLA-DQB1 | TRIM14 | 9606.ENSP00000364080 | 9606.ENSP00000344208 | 0 | 0.9 |
| HLA-DQB1 | PTAFR | 9606.ENSP00000364080 | 9606.ENSP00000362965 | 0.124 | 0.908 |
| HLA-DQB1 | MR1 | 9606.ENSP00000364080 | 9606.ENSP00000477563 | 0.084 | 0.562 |
| HLA-DQB1 | LAT | 9606.ENSP00000364080 | 9606.ENSP00000378845 | 0.061 | 0.902 |
| HLA-F | LILRA2 | 9606.ENSP00000259951 | 9606.ENSP00000251377 | 0.065 | 0.917 |
| HLA-F | SLC40A1 | 9606.ENSP00000259951 | 9606.ENSP00000261024 | 0 | 0.41 |
| HLA-F | MR1 | 9606.ENSP00000259951 | 9606.ENSP00000477563 | 0.076 | 0.593 |
| HLA-F | TRIM14 | 9606.ENSP00000259951 | 9606.ENSP00000344208 | 0.064 | 0.902 |
| HLA-F | PTAFR | 9606.ENSP00000259951 | 9606.ENSP00000362965 | 0.077 | 0.907 |
| HLA-F | XAF1 | 9606.ENSP00000259951 | 9606.ENSP00000354822 | 0.089 | 0.908 |
| HMHA1 | PYCARD | 9606.ENSP00000439601 | 9606.ENSP00000247470 | 0.078 | 0.903 |
| HMHA1 | RAC2 | 9606.ENSP00000439601 | 9606.ENSP00000249071 | 0.349 | 0.945 |
| HMHA1 | MYO1F | 9606.ENSP00000439601 | 9606.ENSP00000344871 | 0.209 | 0.506 |
| HMHA1 | MNDA | 9606.ENSP00000439601 | 9606.ENSP00000357123 | 0.055 | 0.901 |
| HMHA1 | NHLRC3 | 9606.ENSP00000439601 | 9606.ENSP00000368920 | 0.057 | 0.901 |
| HMHA1 | NCF4 | 9606.ENSP00000439601 | 9606.ENSP00000380334 | 0.097 | 0.408 |
| HMHA1 | PLAC8 | 9606.ENSP00000439601 | 9606.ENSP00000399700 | 0.064 | 0.902 |
| HMHA1 | RNASET2 | 9606.ENSP00000439601 | 9606.ENSP00000426455 | 0.061 | 0.902 |
| IFIH1 | UNC93B1 | 9606.ENSP00000263642 | 9606.ENSP00000227471 | 0.157 | 0.537 |
| IFIH1 | PYCARD | 9606.ENSP00000263642 | 9606.ENSP00000247470 | 0.077 | 0.461 |
| IFIH1 | RTP4 | 9606.ENSP00000263642 | 9606.ENSP00000259030 | 0.774 | 0.843 |
| IFIH1 | TLR2 | 9606.ENSP00000263642 | 9606.ENSP00000260010 | 0.136 | 0.738 |
| IFIH1 | NCF2 | 9606.ENSP00000263642 | 9606.ENSP00000356505 | 0.153 | 0.422 |
| IFIH1 | ITGAX | 9606.ENSP00000263642 | 9606.ENSP00000454623 | 0.062 | 0.435 |
| IFIH1 | UBASH3A | 9606.ENSP00000263642 | 9606.ENSP00000317327 | 0.066 | 0.456 |
| IFIH1 | NLRC4 | 9606.ENSP00000263642 | 9606.ENSP00000385090 | 0.083 | 0.495 |
| IFIH1 | TLR5 | 9606.ENSP00000263642 | 9606.ENSP00000440643 | 0.061 | 0.716 |
| IFIH1 | TLR6 | 9606.ENSP00000263642 | 9606.ENSP00000389600 | 0.107 | 0.729 |
| IFIH1 | TLR8 | 9606.ENSP00000263642 | 9606.ENSP00000312082 | 0.116 | 0.758 |
| IFIH1 | XAF1 | 9606.ENSP00000263642 | 9606.ENSP00000354822 | 0.646 | 0.778 |
| IFIH1 | SAMD9L | 9606.ENSP00000263642 | 9606.ENSP00000326247 | 0.776 | 0.827 |
| IFIH1 | STAT1 | 9606.ENSP00000263642 | 9606.ENSP00000354394 | 0.712 | 0.909 |
| IFIH1 | IKBKE | 9606.ENSP00000263642 | 9606.ENSP00000464030 | 0.116 | 0.979 |
| IGLL5 | NCKAP1L | 9606.ENSP00000431254 | 9606.ENSP00000293373 | 0.139 | 0.91 |
| IGLL5 | PNOC | 9606.ENSP00000431254 | 9606.ENSP00000301908 | 0.213 | 0.53 |
| IGLL5 | IKZF1 | 9606.ENSP00000431254 | 9606.ENSP00000331614 | 0.156 | 0.508 |
| IGLL5 | SYK | 9606.ENSP00000431254 | 9606.ENSP00000364907 | 0.126 | 0.943 |
| IGLL5 | PIK3CD | 9606.ENSP00000431254 | 9606.ENSP00000366563 | 0.072 | 0.903 |
| IGLL5 | MS4A1 | 9606.ENSP00000431254 | 9606.ENSP00000433277 | 0.46 | 0.677 |
| IGLL5 | VAV1 | 9606.ENSP00000431254 | 9606.ENSP00000472929 | 0.088 | 0.915 |
| IKBKE | TLR2 | 9606.ENSP00000464030 | 9606.ENSP00000260010 | 0.091 | 0.523 |
| IKBKE | TLR8 | 9606.ENSP00000464030 | 9606.ENSP00000312082 | 0.084 | 0.539 |
| IKBKE | STAT1 | 9606.ENSP00000464030 | 9606.ENSP00000354394 | 0.085 | 0.593 |
| IKBKE | TLR6 | 9606.ENSP00000464030 | 9606.ENSP00000389600 | 0.096 | 0.52 |
| IKBKE | INPP5D | 9606.ENSP00000464030 | 9606.ENSP00000405338 | 0.086 | 0.43 |
| IKBKE | TLR5 | 9606.ENSP00000464030 | 9606.ENSP00000440643 | 0.061 | 0.501 |
| IKZF1 | IL2RB | 9606.ENSP00000331614 | 9606.ENSP00000216223 | 0.56 | 0.676 |
| IKZF1 | PLEK | 9606.ENSP00000331614 | 9606.ENSP00000234313 | 0.624 | 0.645 |
| IKZF1 | SELL | 9606.ENSP00000331614 | 9606.ENSP00000236147 | 0.344 | 0.498 |
| IKZF1 | S1PR4 | 9606.ENSP00000331614 | 9606.ENSP00000246115 | 0.362 | 0.4 |
| IKZF1 | RAC2 | 9606.ENSP00000331614 | 9606.ENSP00000249071 | 0.355 | 0.477 |
| IKZF1 | LY9 | 9606.ENSP00000331614 | 9606.ENSP00000263285 | 0.591 | 0.642 |
| IKZF1 | VAV1 | 9606.ENSP00000331614 | 9606.ENSP00000472929 | 0.233 | 0.412 |
| IKZF1 | RASAL3 | 9606.ENSP00000331614 | 9606.ENSP00000341905 | 0.436 | 0.436 |
| IKZF1 | MS4A1 | 9606.ENSP00000331614 | 9606.ENSP00000433277 | 0.358 | 0.473 |
| IKZF1 | JAK3 | 9606.ENSP00000331614 | 9606.ENSP00000391676 | 0.123 | 0.496 |
| IKZF1 | PSTPIP1 | 9606.ENSP00000331614 | 9606.ENSP00000452746 | 0.413 | 0.523 |
| IKZF1 | INPP5D | 9606.ENSP00000331614 | 9606.ENSP00000405338 | 0.477 | 0.552 |
| IKZF1 | MPEG1 | 9606.ENSP00000331614 | 9606.ENSP00000354335 | 0.558 | 0.558 |
| IKZF1 | KLHL6 | 9606.ENSP00000331614 | 9606.ENSP00000341342 | 0.579 | 0.586 |
| IKZF1 | LCK | 9606.ENSP00000331614 | 9606.ENSP00000337825 | 0.201 | 0.601 |
| IKZF1 | LCP1 | 9606.ENSP00000331614 | 9606.ENSP00000381581 | 0.446 | 0.615 |
| IKZF1 | SYK | 9606.ENSP00000331614 | 9606.ENSP00000364907 | 0.222 | 0.666 |
| IKZF1 | IL2RG | 9606.ENSP00000331614 | 9606.ENSP00000363318 | 0.646 | 0.683 |
| IKZF1 | IKZF3 | 9606.ENSP00000331614 | 9606.ENSP00000344544 | 0.31 | 0.812 |
| IKZF3 | IL2RB | 9606.ENSP00000344544 | 9606.ENSP00000216223 | 0.303 | 0.939 |
| IKZF3 | LCK | 9606.ENSP00000344544 | 9606.ENSP00000337825 | 0.15 | 0.928 |
| IKZF3 | INPP5D | 9606.ENSP00000344544 | 9606.ENSP00000405338 | 0.378 | 0.404 |
| IKZF3 | IL2RG | 9606.ENSP00000344544 | 9606.ENSP00000363318 | 0.161 | 0.913 |
| IKZF3 | JAK3 | 9606.ENSP00000344544 | 9606.ENSP00000391676 | 0.112 | 0.922 |
| IL2RB | RAC2 | 9606.ENSP00000216223 | 9606.ENSP00000249071 | 0.236 | 0.439 |
| IL2RB | TNFRSF9 | 9606.ENSP00000216223 | 9606.ENSP00000478699 | 0.062 | 0.491 |
| IL2RB | SLAMF6 | 9606.ENSP00000216223 | 9606.ENSP00000357036 | 0.188 | 0.498 |
| IL2RB | ITGAX | 9606.ENSP00000216223 | 9606.ENSP00000454623 | 0.115 | 0.612 |
| IL2RB | LY9 | 9606.ENSP00000216223 | 9606.ENSP00000263285 | 0.532 | 0.642 |
| IL2RB | SELL | 9606.ENSP00000216223 | 9606.ENSP00000236147 | 0.158 | 0.755 |
| IL2RB | PTK2B | 9606.ENSP00000216223 | 9606.ENSP00000380638 | 0.123 | 0.912 |
| IL2RB | PIK3CD | 9606.ENSP00000216223 | 9606.ENSP00000366563 | 0.107 | 0.916 |
| IL2RB | INPP5D | 9606.ENSP00000216223 | 9606.ENSP00000405338 | 0.393 | 0.94 |
| IL2RB | STAT1 | 9606.ENSP00000216223 | 9606.ENSP00000354394 | 0.063 | 0.95 |
| IL2RB | SYK | 9606.ENSP00000216223 | 9606.ENSP00000364907 | 0.207 | 0.957 |
| IL2RB | JAK3 | 9606.ENSP00000216223 | 9606.ENSP00000391676 | 0.113 | 0.97 |
| IL2RB | LCK | 9606.ENSP00000216223 | 9606.ENSP00000337825 | 0.187 | 0.97 |
| IL2RB | IL2RG | 9606.ENSP00000216223 | 9606.ENSP00000363318 | 0.299 | 0.998 |
| IL2RG | PLEK | 9606.ENSP00000363318 | 9606.ENSP00000234313 | 0.429 | 0.436 |
| IL2RG | SELL | 9606.ENSP00000363318 | 9606.ENSP00000236147 | 0.293 | 0.576 |
| IL2RG | RAC2 | 9606.ENSP00000363318 | 9606.ENSP00000249071 | 0.368 | 0.547 |
| IL2RG | LY9 | 9606.ENSP00000363318 | 9606.ENSP00000263285 | 0.547 | 0.609 |
| IL2RG | LCK | 9606.ENSP00000363318 | 9606.ENSP00000337825 | 0.228 | 0.945 |
| IL2RG | MPEG1 | 9606.ENSP00000363318 | 9606.ENSP00000354335 | 0.558 | 0.601 |
| IL2RG | STAT1 | 9606.ENSP00000363318 | 9606.ENSP00000354394 | 0.064 | 0.953 |
| IL2RG | SLAMF6 | 9606.ENSP00000363318 | 9606.ENSP00000357036 | 0.336 | 0.4 |
| IL2RG | LTB | 9606.ENSP00000363318 | 9606.ENSP00000410481 | 0.348 | 0.419 |
| IL2RG | PIK3CD | 9606.ENSP00000363318 | 9606.ENSP00000366563 | 0.131 | 0.911 |
| IL2RG | PTK2B | 9606.ENSP00000363318 | 9606.ENSP00000380638 | 0.134 | 0.923 |
| IL2RG | SYK | 9606.ENSP00000363318 | 9606.ENSP00000364907 | 0.173 | 0.927 |
| IL2RG | INPP5D | 9606.ENSP00000363318 | 9606.ENSP00000405338 | 0.311 | 0.931 |
| IL2RG | JAK3 | 9606.ENSP00000363318 | 9606.ENSP00000391676 | 0.152 | 0.989 |
| INPP5D | PLEK | 9606.ENSP00000405338 | 9606.ENSP00000234313 | 0.293 | 0.524 |
| INPP5D | RAC2 | 9606.ENSP00000405338 | 9606.ENSP00000249071 | 0.258 | 0.529 |
| INPP5D | TLR2 | 9606.ENSP00000405338 | 9606.ENSP00000260010 | 0.115 | 0.411 |
| INPP5D | IRAK3 | 9606.ENSP00000405338 | 9606.ENSP00000261233 | 0.097 | 0.543 |
| INPP5D | LY9 | 9606.ENSP00000405338 | 9606.ENSP00000263285 | 0.379 | 0.614 |
| INPP5D | NCKAP1L | 9606.ENSP00000405338 | 9606.ENSP00000293373 | 0.577 | 0.577 |
| INPP5D | LCK | 9606.ENSP00000405338 | 9606.ENSP00000337825 | 0.101 | 0.556 |
| INPP5D | MPEG1 | 9606.ENSP00000405338 | 9606.ENSP00000354335 | 0.453 | 0.453 |
| INPP5D | SYK | 9606.ENSP00000405338 | 9606.ENSP00000364907 | 0.193 | 0.653 |
| INPP5D | PIK3CD | 9606.ENSP00000405338 | 9606.ENSP00000366563 | 0.125 | 0.928 |
| INPP5D | LAT | 9606.ENSP00000405338 | 9606.ENSP00000378845 | 0.088 | 0.796 |
| INPP5D | PTK2B | 9606.ENSP00000405338 | 9606.ENSP00000380638 | 0.139 | 0.578 |
| INPP5D | JAK3 | 9606.ENSP00000405338 | 9606.ENSP00000391676 | 0.098 | 0.964 |
| INPP5D | SYNRG | 9606.ENSP00000405338 | 9606.ENSP00000483453 | 0.063 | 0.469 |
| INPP5D | VAV1 | 9606.ENSP00000405338 | 9606.ENSP00000472929 | 0.239 | 0.54 |
| INPP5D | PSTPIP1 | 9606.ENSP00000405338 | 9606.ENSP00000452746 | 0.203 | 0.655 |
| IRAK3 | TLR2 | 9606.ENSP00000261233 | 9606.ENSP00000260010 | 0.267 | 0.786 |
| IRAK3 | TLR5 | 9606.ENSP00000261233 | 9606.ENSP00000440643 | 0.065 | 0.637 |
| IRAK3 | TLR6 | 9606.ENSP00000261233 | 9606.ENSP00000389600 | 0.088 | 0.64 |
| IRAK3 | TLR8 | 9606.ENSP00000261233 | 9606.ENSP00000312082 | 0.211 | 0.691 |
| ITGAD | ITGAX | 9606.ENSP00000373854 | 9606.ENSP00000454623 | 0.07 | 0.733 |
| ITGAX | SELPLG | 9606.ENSP00000454623 | 9606.ENSP00000228463 | 0.14 | 0.424 |
| ITGAX | SELL | 9606.ENSP00000454623 | 9606.ENSP00000236147 | 0.175 | 0.827 |
| ITGAX | TLR2 | 9606.ENSP00000454623 | 9606.ENSP00000260010 | 0.23 | 0.769 |
| ITGAX | LY75 | 9606.ENSP00000454623 | 9606.ENSP00000263636 | 0.096 | 0.835 |
| ITGAX | TLR8 | 9606.ENSP00000454623 | 9606.ENSP00000312082 | 0.347 | 0.76 |
| ITGAX | PTGDR2 | 9606.ENSP00000454623 | 9606.ENSP00000332812 | 0 | 0.441 |
| ITGAX | LCK | 9606.ENSP00000454623 | 9606.ENSP00000337825 | 0.065 | 0.495 |
| ITGAX | MYO1F | 9606.ENSP00000454623 | 9606.ENSP00000344871 | 0.567 | 0.567 |
| ITGAX | MPEG1 | 9606.ENSP00000454623 | 9606.ENSP00000354335 | 0.352 | 0.422 |
| ITGAX | STAT1 | 9606.ENSP00000454623 | 9606.ENSP00000354394 | 0.061 | 0.953 |
| ITGAX | MMP9 | 9606.ENSP00000454623 | 9606.ENSP00000361405 | 0.163 | 0.468 |
| ITGAX | PTAFR | 9606.ENSP00000454623 | 9606.ENSP00000362965 | 0.293 | 0.928 |
| ITGAX | SYK | 9606.ENSP00000454623 | 9606.ENSP00000364907 | 0.183 | 0.581 |
| ITGAX | TNFSF13B | 9606.ENSP00000454623 | 9606.ENSP00000365048 | 0.185 | 0.583 |
| ITGAX | LAIR1 | 9606.ENSP00000454623 | 9606.ENSP00000375622 | 0.246 | 0.939 |
| ITGAX | TRPM2 | 9606.ENSP00000454623 | 9606.ENSP00000381023 | 0.091 | 0.905 |
| ITGAX | NLRC4 | 9606.ENSP00000454623 | 9606.ENSP00000385090 | 0.16 | 0.402 |
| ITGAX | TLR6 | 9606.ENSP00000454623 | 9606.ENSP00000389600 | 0.087 | 0.614 |
| ITGAX | TLR5 | 9606.ENSP00000454623 | 9606.ENSP00000440643 | 0.07 | 0.682 |
| ITGAX | TNFRSF9 | 9606.ENSP00000454623 | 9606.ENSP00000478699 | 0.099 | 0.521 |
| JAK3 | RAC2 | 9606.ENSP00000391676 | 9606.ENSP00000249071 | 0.095 | 0.406 |
| JAK3 | LCK | 9606.ENSP00000391676 | 9606.ENSP00000337825 | 0.107 | 0.95 |
| JAK3 | STAT1 | 9606.ENSP00000391676 | 9606.ENSP00000354394 | 0.061 | 0.986 |
| JAK3 | SYK | 9606.ENSP00000391676 | 9606.ENSP00000364907 | 0.088 | 0.924 |
| JAK3 | PIK3CD | 9606.ENSP00000391676 | 9606.ENSP00000366563 | 0.116 | 0.917 |
| JAK3 | PTK2B | 9606.ENSP00000391676 | 9606.ENSP00000380638 | 0.082 | 0.948 |
| JAK3 | VAV1 | 9606.ENSP00000391676 | 9606.ENSP00000472929 | 0.141 | 0.468 |
| KLHL6 | LY9 | 9606.ENSP00000341342 | 9606.ENSP00000263285 | 0.557 | 0.557 |
| LAIR1 | STK10 | 9606.ENSP00000375622 | 9606.ENSP00000176763 | 0.095 | 0.905 |
| LAIR1 | PILRA | 9606.ENSP00000375622 | 9606.ENSP00000198536 | 0.118 | 0.736 |
| LAIR1 | MMP25 | 9606.ENSP00000375622 | 9606.ENSP00000337816 | 0 | 0.9 |
| LAIR1 | SLAMF6 | 9606.ENSP00000375622 | 9606.ENSP00000357036 | 0.129 | 0.452 |
| LAIR1 | PTAFR | 9606.ENSP00000375622 | 9606.ENSP00000362965 | 0.142 | 0.913 |
| LAIR1 | RAB37 | 9606.ENSP00000375622 | 9606.ENSP00000376390 | 0.07 | 0.903 |
| LAIR1 | TRPM2 | 9606.ENSP00000375622 | 9606.ENSP00000381023 | 0.096 | 0.905 |
| LAT | LY9 | 9606.ENSP00000378845 | 9606.ENSP00000263285 | 0.107 | 0.401 |
| LAT | UBASH3A | 9606.ENSP00000378845 | 9606.ENSP00000317327 | 0.14 | 0.623 |
| LAT | LCK | 9606.ENSP00000378845 | 9606.ENSP00000337825 | 0.241 | 0.991 |
| LAT | SYK | 9606.ENSP00000378845 | 9606.ENSP00000364907 | 0.062 | 0.99 |
| LAT | WIPF1 | 9606.ENSP00000378845 | 9606.ENSP00000376330 | 0.049 | 0.501 |
| LAT | SLA | 9606.ENSP00000378845 | 9606.ENSP00000394049 | 0.081 | 0.582 |
| LAT | VAV1 | 9606.ENSP00000378845 | 9606.ENSP00000472929 | 0.11 | 0.985 |
| LCK | NCK2 | 9606.ENSP00000337825 | 9606.ENSP00000233154 | 0.05 | 0.921 |
| LCK | PLEK | 9606.ENSP00000337825 | 9606.ENSP00000234313 | 0.084 | 0.481 |
| LCK | SELL | 9606.ENSP00000337825 | 9606.ENSP00000236147 | 0.116 | 0.576 |
| LCK | RAC2 | 9606.ENSP00000337825 | 9606.ENSP00000249071 | 0.192 | 0.56 |
| LCK | LY9 | 9606.ENSP00000337825 | 9606.ENSP00000263285 | 0.13 | 0.467 |
| LCK | UBASH3A | 9606.ENSP00000337825 | 9606.ENSP00000317327 | 0.277 | 0.483 |
| LCK | MMP9 | 9606.ENSP00000337825 | 9606.ENSP00000361405 | 0 | 0.555 |
| LCK | MS4A1 | 9606.ENSP00000337825 | 9606.ENSP00000433277 | 0.228 | 0.562 |
| LCK | TNFRSF9 | 9606.ENSP00000337825 | 9606.ENSP00000478699 | 0 | 0.61 |
| LCK | SLAMF6 | 9606.ENSP00000337825 | 9606.ENSP00000357036 | 0.121 | 0.613 |
| LCK | SLA | 9606.ENSP00000337825 | 9606.ENSP00000394049 | 0.096 | 0.914 |
| LCK | PTK2B | 9606.ENSP00000337825 | 9606.ENSP00000380638 | 0 | 0.952 |
| LCK | SYK | 9606.ENSP00000337825 | 9606.ENSP00000364907 | 0.096 | 0.959 |
| LCK | STAT1 | 9606.ENSP00000337825 | 9606.ENSP00000354394 | 0 | 0.964 |
| LCK | VAV1 | 9606.ENSP00000337825 | 9606.ENSP00000472929 | 0.172 | 0.992 |
| LCP1 | PLEK | 9606.ENSP00000381581 | 9606.ENSP00000234313 | 0.584 | 0.621 |
| LCP1 | RAC2 | 9606.ENSP00000381581 | 9606.ENSP00000249071 | 0.576 | 0.68 |
| LCP1 | NCKAP1L | 9606.ENSP00000381581 | 9606.ENSP00000293373 | 0.318 | 0.43 |
| LCP1 | MYO1F | 9606.ENSP00000381581 | 9606.ENSP00000344871 | 0.229 | 0.489 |
| LCP1 | MPEG1 | 9606.ENSP00000381581 | 9606.ENSP00000354335 | 0.266 | 0.687 |
| LCP1 | SYK | 9606.ENSP00000381581 | 9606.ENSP00000364907 | 0.222 | 0.435 |
| LCP1 | NCF4 | 9606.ENSP00000381581 | 9606.ENSP00000380334 | 0.335 | 0.43 |
| LCP1 | MS4A1 | 9606.ENSP00000381581 | 9606.ENSP00000433277 | 0.299 | 0.437 |
| LCP1 | LPXN | 9606.ENSP00000381581 | 9606.ENSP00000431284 | 0.169 | 0.924 |
| LILRA2 | TLR8 | 9606.ENSP00000251377 | 9606.ENSP00000312082 | 0.168 | 0.404 |
| LILRA2 | TLR6 | 9606.ENSP00000251377 | 9606.ENSP00000389600 | 0.076 | 0.441 |
| LILRA2 | SYK | 9606.ENSP00000251377 | 9606.ENSP00000364907 | 0.103 | 0.694 |
| LPXN | RAC2 | 9606.ENSP00000431284 | 9606.ENSP00000249071 | 0.305 | 0.47 |
| LPXN | PTK2B | 9606.ENSP00000431284 | 9606.ENSP00000380638 | 0.072 | 0.987 |
| LPXN | PSTPIP1 | 9606.ENSP00000431284 | 9606.ENSP00000452746 | 0.141 | 0.401 |
| LRRK2 | RAC2 | 9606.ENSP00000298910 | 9606.ENSP00000249071 | 0.084 | 0.419 |
| LRRK2 | TLR8 | 9606.ENSP00000298910 | 9606.ENSP00000312082 | 0.329 | 0.421 |
| LRRK2 | PRKACB | 9606.ENSP00000298910 | 9606.ENSP00000359719 | 0.147 | 0.439 |
| LRRK2 | UCP2 | 9606.ENSP00000298910 | 9606.ENSP00000312029 | 0 | 0.461 |
| LRRK2 | NLRC4 | 9606.ENSP00000298910 | 9606.ENSP00000385090 | 0.187 | 0.575 |
| LSP1 | SELPLG | 9606.ENSP00000371194 | 9606.ENSP00000228463 | 0.327 | 0.411 |
| LSP1 | RAC2 | 9606.ENSP00000371194 | 9606.ENSP00000249071 | 0.374 | 0.417 |
| LSP1 | TNNI2 | 9606.ENSP00000371194 | 9606.ENSP00000371331 | 0.184 | 0.442 |
| LTB | SELL | 9606.ENSP00000410481 | 9606.ENSP00000236147 | 0.249 | 0.406 |
| LTB | TNFSF13B | 9606.ENSP00000410481 | 9606.ENSP00000365048 | 0.096 | 0.943 |
| LTB | TNFSF14 | 9606.ENSP00000410481 | 9606.ENSP00000469049 | 0.096 | 0.945 |
| LY75 | SELL | 9606.ENSP00000263636 | 9606.ENSP00000236147 | 0.158 | 0.498 |
| LY75 | TLR2 | 9606.ENSP00000263636 | 9606.ENSP00000260010 | 0.111 | 0.555 |
| LY75 | TLR5 | 9606.ENSP00000263636 | 9606.ENSP00000440643 | 0 | 0.456 |
| LY75 | TLR6 | 9606.ENSP00000263636 | 9606.ENSP00000389600 | 0.087 | 0.465 |
| LY75 | TLR8 | 9606.ENSP00000263636 | 9606.ENSP00000312082 | 0.131 | 0.531 |
| LY9 | PLEK | 9606.ENSP00000263285 | 9606.ENSP00000234313 | 0.527 | 0.531 |
| LY9 | VAV1 | 9606.ENSP00000263285 | 9606.ENSP00000472929 | 0.162 | 0.4 |
| LY9 | MPEG1 | 9606.ENSP00000263285 | 9606.ENSP00000354335 | 0.545 | 0.545 |
| MAFB | MMP9 | 9606.ENSP00000362410 | 9606.ENSP00000361405 | 0.139 | 0.57 |
| MMP25 | STK10 | 9606.ENSP00000337816 | 9606.ENSP00000176763 | 0.065 | 0.902 |
| MMP25 | RAB37 | 9606.ENSP00000337816 | 9606.ENSP00000376390 | 0 | 0.9 |
| MMP25 | TRPM2 | 9606.ENSP00000337816 | 9606.ENSP00000381023 | 0.076 | 0.907 |
| MMP9 | SELL | 9606.ENSP00000361405 | 9606.ENSP00000236147 | 0.098 | 0.501 |
| MMP9 | TLR2 | 9606.ENSP00000361405 | 9606.ENSP00000260010 | 0.165 | 0.799 |
| MMP9 | TLR8 | 9606.ENSP00000361405 | 9606.ENSP00000312082 | 0.26 | 0.567 |
| MMP9 | QPCT | 9606.ENSP00000361405 | 9606.ENSP00000344829 | 0.065 | 0.908 |
| MMP9 | STAT1 | 9606.ENSP00000361405 | 9606.ENSP00000354394 | 0 | 0.572 |
| MMP9 | NCF2 | 9606.ENSP00000361405 | 9606.ENSP00000356505 | 0.228 | 0.777 |
| MMP9 | TLR5 | 9606.ENSP00000361405 | 9606.ENSP00000440643 | 0.077 | 0.464 |
| MMP9 | TLR6 | 9606.ENSP00000361405 | 9606.ENSP00000389600 | 0.065 | 0.473 |
| MMP9 | PTK2B | 9606.ENSP00000361405 | 9606.ENSP00000380638 | 0.062 | 0.591 |
| MMP9 | NCF4 | 9606.ENSP00000361405 | 9606.ENSP00000380334 | 0.198 | 0.74 |
| MNDA | PLEK | 9606.ENSP00000357123 | 9606.ENSP00000234313 | 0.56 | 0.574 |
| MNDA | SELL | 9606.ENSP00000357123 | 9606.ENSP00000236147 | 0.46 | 0.46 |
| MNDA | S1PR4 | 9606.ENSP00000357123 | 9606.ENSP00000246115 | 0.555 | 0.555 |
| MNDA | PYCARD | 9606.ENSP00000357123 | 9606.ENSP00000247470 | 0.116 | 0.968 |
| MNDA | TLR2 | 9606.ENSP00000357123 | 9606.ENSP00000260010 | 0.553 | 0.598 |
| MNDA | MS4A7 | 9606.ENSP00000357123 | 9606.ENSP00000300184 | 0.337 | 0.491 |
| MNDA | TLR8 | 9606.ENSP00000357123 | 9606.ENSP00000312082 | 0.753 | 0.794 |
| MNDA | P2RY13 | 9606.ENSP00000357123 | 9606.ENSP00000320376 | 0.546 | 0.546 |
| MNDA | VNN2 | 9606.ENSP00000357123 | 9606.ENSP00000322276 | 0.676 | 0.709 |
| MNDA | MYO1F | 9606.ENSP00000357123 | 9606.ENSP00000344871 | 0.521 | 0.521 |
| MNDA | MPEG1 | 9606.ENSP00000357123 | 9606.ENSP00000354335 | 0.529 | 0.529 |
| MNDA | NCF2 | 9606.ENSP00000357123 | 9606.ENSP00000356505 | 0.777 | 0.805 |
| MNDA | PTAFR | 9606.ENSP00000357123 | 9606.ENSP00000362965 | 0.249 | 0.414 |
| MNDA | PIK3R6 | 9606.ENSP00000357123 | 9606.ENSP00000480157 | 0.459 | 0.459 |
| MNDA | SLA | 9606.ENSP00000357123 | 9606.ENSP00000394049 | 0.522 | 0.522 |
| MNDA | NLRC4 | 9606.ENSP00000357123 | 9606.ENSP00000385090 | 0.337 | 0.528 |
| MNDA | TNFAIP8L2 | 9606.ENSP00000357123 | 9606.ENSP00000357906 | 0.537 | 0.537 |
| MNDA | NCF4 | 9606.ENSP00000357123 | 9606.ENSP00000380334 | 0.536 | 0.551 |
| MNDA | NHLRC3 | 9606.ENSP00000357123 | 9606.ENSP00000368920 | 0 | 0.901 |
| MNDA | RNASET2 | 9606.ENSP00000357123 | 9606.ENSP00000426455 | 0.101 | 0.906 |
| MNDA | PLAC8 | 9606.ENSP00000357123 | 9606.ENSP00000399700 | 0.109 | 0.907 |
| MPEG1 | PLEK | 9606.ENSP00000354335 | 9606.ENSP00000234313 | 0.662 | 0.667 |
| MPEG1 | TLR2 | 9606.ENSP00000354335 | 9606.ENSP00000260010 | 0.347 | 0.405 |
| MPEG1 | TLR8 | 9606.ENSP00000354335 | 9606.ENSP00000312082 | 0.526 | 0.566 |
| MS4A1 | SELL | 9606.ENSP00000433277 | 9606.ENSP00000236147 | 0.343 | 0.482 |
| MS4A1 | MS4A7 | 9606.ENSP00000433277 | 9606.ENSP00000300184 | 0.098 | 0.767 |
| MYO1F | PLEK | 9606.ENSP00000344871 | 9606.ENSP00000234313 | 0.592 | 0.657 |
| MYO1F | S1PR4 | 9606.ENSP00000344871 | 9606.ENSP00000246115 | 0.561 | 0.561 |
| MYO1F | RAC2 | 9606.ENSP00000344871 | 9606.ENSP00000249071 | 0.257 | 0.507 |
| MYO1F | NCF2 | 9606.ENSP00000344871 | 9606.ENSP00000356505 | 0.311 | 0.401 |
| MYO1F | SLA | 9606.ENSP00000344871 | 9606.ENSP00000394049 | 0.56 | 0.56 |
| MYO1F | WIPF1 | 9606.ENSP00000344871 | 9606.ENSP00000376330 | 0.122 | 0.571 |
| MYO1F | PSTPIP1 | 9606.ENSP00000344871 | 9606.ENSP00000452746 | 0.344 | 0.6 |
| MYO1F | NCF4 | 9606.ENSP00000344871 | 9606.ENSP00000380334 | 0.533 | 0.62 |
| N4BP2L1 | ZNF589 | 9606.ENSP00000369473 | 9606.ENSP00000346729 | 0 | 0.416 |
| NCF2 | PLEK | 9606.ENSP00000356505 | 9606.ENSP00000234313 | 0.58 | 0.651 |
| NCF2 | S1PR4 | 9606.ENSP00000356505 | 9606.ENSP00000246115 | 0.554 | 0.554 |
| NCF2 | RAC2 | 9606.ENSP00000356505 | 9606.ENSP00000249071 | 0.311 | 0.989 |
| NCF2 | TLR2 | 9606.ENSP00000356505 | 9606.ENSP00000260010 | 0.646 | 0.741 |
| NCF2 | TLR8 | 9606.ENSP00000356505 | 9606.ENSP00000312082 | 0.456 | 0.548 |
| NCF2 | VNN2 | 9606.ENSP00000356505 | 9606.ENSP00000322276 | 0.551 | 0.558 |
| NCF2 | VAV1 | 9606.ENSP00000356505 | 9606.ENSP00000472929 | 0.171 | 0.935 |
| NCF2 | NCF4 | 9606.ENSP00000356505 | 9606.ENSP00000380334 | 0.531 | 0.98 |
| NCF4 | PLEK | 9606.ENSP00000380334 | 9606.ENSP00000234313 | 0.544 | 0.625 |
| NCF4 | S1PR4 | 9606.ENSP00000380334 | 9606.ENSP00000246115 | 0.551 | 0.551 |
| NCF4 | RAC2 | 9606.ENSP00000380334 | 9606.ENSP00000249071 | 0.306 | 0.985 |
| NCF4 | TLR2 | 9606.ENSP00000380334 | 9606.ENSP00000260010 | 0.269 | 0.454 |
| NCF4 | NCKAP1L | 9606.ENSP00000380334 | 9606.ENSP00000293373 | 0.511 | 0.511 |
| NCF4 | TLR8 | 9606.ENSP00000380334 | 9606.ENSP00000312082 | 0.348 | 0.455 |
| NCF4 | VNN2 | 9606.ENSP00000380334 | 9606.ENSP00000322276 | 0.493 | 0.493 |
| NCF4 | RASAL3 | 9606.ENSP00000380334 | 9606.ENSP00000341905 | 0.428 | 0.526 |
| NCF4 | SLA | 9606.ENSP00000380334 | 9606.ENSP00000394049 | 0.532 | 0.532 |
| NCF4 | VAV1 | 9606.ENSP00000380334 | 9606.ENSP00000472929 | 0.263 | 0.937 |
| NCK2 | WIPF1 | 9606.ENSP00000233154 | 9606.ENSP00000376330 | 0 | 0.705 |
| NCK2 | RAC2 | 9606.ENSP00000233154 | 9606.ENSP00000249071 | 0 | 0.857 |
| NCK2 | PRKACB | 9606.ENSP00000233154 | 9606.ENSP00000359719 | 0 | 0.9 |
| NCKAP1L | PLEK | 9606.ENSP00000293373 | 9606.ENSP00000234313 | 0.534 | 0.567 |
| NCKAP1L | RAC2 | 9606.ENSP00000293373 | 9606.ENSP00000249071 | 0.525 | 0.871 |
| NCKAP1L | WIPF1 | 9606.ENSP00000293373 | 9606.ENSP00000376330 | 0.119 | 0.928 |
| NCKAP1L | SYK | 9606.ENSP00000293373 | 9606.ENSP00000364907 | 0.235 | 0.937 |
| NCKAP1L | VAV1 | 9606.ENSP00000293373 | 9606.ENSP00000472929 | 0.368 | 0.947 |
| NFAM1 | SYK | 9606.ENSP00000333680 | 9606.ENSP00000364907 | 0.158 | 0.764 |
| NFAM1 | RAB37 | 9606.ENSP00000333680 | 9606.ENSP00000376390 | 0.076 | 0.903 |
| NFAM1 | VNN1 | 9606.ENSP00000333680 | 9606.ENSP00000356905 | 0.089 | 0.906 |
| NHLRC3 | PYCARD | 9606.ENSP00000368920 | 9606.ENSP00000247470 | 0 | 0.901 |
| NHLRC3 | RNASET2 | 9606.ENSP00000368920 | 9606.ENSP00000426455 | 0 | 0.9 |
| NHLRC3 | PLAC8 | 9606.ENSP00000368920 | 9606.ENSP00000399700 | 0 | 0.9 |
| NLRC3 | PYCARD | 9606.ENSP00000352039 | 9606.ENSP00000247470 | 0 | 0.628 |
| NLRC3 | NLRC4 | 9606.ENSP00000352039 | 9606.ENSP00000385090 | 0.061 | 0.618 |
| NLRC4 | PYCARD | 9606.ENSP00000385090 | 9606.ENSP00000247470 | 0.086 | 0.977 |
| NLRC4 | TLR2 | 9606.ENSP00000385090 | 9606.ENSP00000260010 | 0.28 | 0.75 |
| NLRC4 | TLR8 | 9606.ENSP00000385090 | 9606.ENSP00000312082 | 0.334 | 0.743 |
| NLRC4 | SYK | 9606.ENSP00000385090 | 9606.ENSP00000364907 | 0.153 | 0.434 |
| NLRC4 | TLR6 | 9606.ENSP00000385090 | 9606.ENSP00000389600 | 0.121 | 0.664 |
| NLRC4 | TLR5 | 9606.ENSP00000385090 | 9606.ENSP00000440643 | 0.111 | 0.728 |
| OXER1 | S1PR4 | 9606.ENSP00000367930 | 9606.ENSP00000246115 | 0.152 | 0.911 |
| OXER1 | PNOC | 9606.ENSP00000367930 | 9606.ENSP00000301908 | 0.088 | 0.904 |
| OXER1 | P2RY14 | 9606.ENSP00000367930 | 9606.ENSP00000308361 | 0.069 | 0.905 |
| OXER1 | P2RY13 | 9606.ENSP00000367930 | 9606.ENSP00000320376 | 0.127 | 0.912 |
| OXER1 | PTGDR2 | 9606.ENSP00000367930 | 9606.ENSP00000332812 | 0 | 0.906 |
| P2RY13 | S1PR4 | 9606.ENSP00000320376 | 9606.ENSP00000246115 | 0.183 | 0.919 |
| P2RY13 | PNOC | 9606.ENSP00000320376 | 9606.ENSP00000301908 | 0.088 | 0.904 |
| P2RY13 | P2RY14 | 9606.ENSP00000320376 | 9606.ENSP00000308361 | 0.293 | 0.931 |
| P2RY13 | TLR8 | 9606.ENSP00000320376 | 9606.ENSP00000312082 | 0.545 | 0.559 |
| P2RY13 | PTGDR2 | 9606.ENSP00000320376 | 9606.ENSP00000332812 | 0 | 0.9 |
| P2RY14 | S1PR4 | 9606.ENSP00000308361 | 9606.ENSP00000246115 | 0.12 | 0.936 |
| P2RY14 | PNOC | 9606.ENSP00000308361 | 9606.ENSP00000301908 | 0.069 | 0.906 |
| P2RY14 | PTGDR2 | 9606.ENSP00000308361 | 9606.ENSP00000332812 | 0 | 0.903 |
| PARP10 | SAMD9L | 9606.ENSP00000325618 | 9606.ENSP00000326247 | 0.246 | 0.425 |
| PARP10 | PARP4 | 9606.ENSP00000325618 | 9606.ENSP00000371419 | 0.062 | 0.683 |
| PDXK | QPCT | 9606.ENSP00000291565 | 9606.ENSP00000344829 | 0.058 | 0.901 |
| PIK3CD | RAC2 | 9606.ENSP00000366563 | 9606.ENSP00000249071 | 0.156 | 0.794 |
| PIK3CD | SYK | 9606.ENSP00000366563 | 9606.ENSP00000364907 | 0.096 | 0.936 |
| PIK3CD | PIK3R6 | 9606.ENSP00000366563 | 9606.ENSP00000480157 | 0.104 | 0.881 |
| PIK3CD | VAV1 | 9606.ENSP00000366563 | 9606.ENSP00000472929 | 0.158 | 0.927 |
| PIK3R6 | PLEK | 9606.ENSP00000480157 | 9606.ENSP00000234313 | 0.444 | 0.545 |
| PIK3R6 | SYK | 9606.ENSP00000480157 | 9606.ENSP00000364907 | 0.152 | 0.92 |
| PIK3R6 | VAV1 | 9606.ENSP00000480157 | 9606.ENSP00000472929 | 0.153 | 0.912 |
| PILRA | SLA | 9606.ENSP00000198536 | 9606.ENSP00000394049 | 0.141 | 0.463 |
| PLAC8 | PYCARD | 9606.ENSP00000399700 | 9606.ENSP00000247470 | 0.144 | 0.91 |
| PLAC8 | RTP4 | 9606.ENSP00000399700 | 9606.ENSP00000259030 | 0.474 | 0.474 |
| PLAC8 | RNASET2 | 9606.ENSP00000399700 | 9606.ENSP00000426455 | 0.062 | 0.902 |
| PLEK | PTK2B | 9606.ENSP00000234313 | 9606.ENSP00000380638 | 0.173 | 0.42 |
| PLEK | TLR2 | 9606.ENSP00000234313 | 9606.ENSP00000260010 | 0.344 | 0.446 |
| PLEK | RASAL3 | 9606.ENSP00000234313 | 9606.ENSP00000341905 | 0.387 | 0.458 |
| PLEK | SELL | 9606.ENSP00000234313 | 9606.ENSP00000236147 | 0.393 | 0.472 |
| PLEK | TLR8 | 9606.ENSP00000234313 | 9606.ENSP00000312082 | 0.441 | 0.492 |
| PLEK | S1PR4 | 9606.ENSP00000234313 | 9606.ENSP00000246115 | 0.536 | 0.541 |
| PLEK | TNFAIP8L2 | 9606.ENSP00000234313 | 9606.ENSP00000357906 | 0.541 | 0.541 |
| PLEK | SLA | 9606.ENSP00000234313 | 9606.ENSP00000394049 | 0.56 | 0.575 |
| PLEK | SYK | 9606.ENSP00000234313 | 9606.ENSP00000364907 | 0.324 | 0.669 |
| PLEK | VAV1 | 9606.ENSP00000234313 | 9606.ENSP00000472929 | 0.308 | 0.736 |
| PLEK | RAC2 | 9606.ENSP00000234313 | 9606.ENSP00000249071 | 0.39 | 0.741 |
| PLXNC1 | SEMA4D | 9606.ENSP00000258526 | 9606.ENSP00000416523 | 0 | 0.915 |
| PNOC | S1PR4 | 9606.ENSP00000301908 | 9606.ENSP00000246115 | 0.139 | 0.91 |
| PNOC | PTGDR2 | 9606.ENSP00000301908 | 9606.ENSP00000332812 | 0 | 0.9 |
| PSTPIP1 | S1PR4 | 9606.ENSP00000452746 | 9606.ENSP00000246115 | 0.528 | 0.528 |
| PSTPIP1 | PYCARD | 9606.ENSP00000452746 | 9606.ENSP00000247470 | 0.089 | 0.558 |
| PSTPIP1 | RAC2 | 9606.ENSP00000452746 | 9606.ENSP00000249071 | 0.176 | 0.476 |
| PSTPIP1 | WIPF1 | 9606.ENSP00000452746 | 9606.ENSP00000376330 | 0.093 | 0.615 |
| PTAFR | TLR2 | 9606.ENSP00000362965 | 9606.ENSP00000260010 | 0.212 | 0.473 |
| PTAFR | TLR8 | 9606.ENSP00000362965 | 9606.ENSP00000312082 | 0.238 | 0.404 |
| PTAFR | TRIM14 | 9606.ENSP00000362965 | 9606.ENSP00000344208 | 0 | 0.9 |
| PTAFR | TRPM2 | 9606.ENSP00000362965 | 9606.ENSP00000381023 | 0.083 | 0.907 |
| PTGDR2 | S1PR4 | 9606.ENSP00000332812 | 9606.ENSP00000246115 | 0 | 0.9 |
| PTK2B | RAC2 | 9606.ENSP00000380638 | 9606.ENSP00000249071 | 0.133 | 0.892 |
| PTK2B | SYK | 9606.ENSP00000380638 | 9606.ENSP00000364907 | 0.1 | 0.952 |
| PTK2B | TRPM2 | 9606.ENSP00000380638 | 9606.ENSP00000381023 | 0.152 | 0.457 |
| PTK2B | VAV1 | 9606.ENSP00000380638 | 9606.ENSP00000472929 | 0.088 | 0.648 |
| PTPRO | SYK | 9606.ENSP00000281171 | 9606.ENSP00000364907 | 0.062 | 0.757 |
| PYCARD | TLR5 | 9606.ENSP00000247470 | 9606.ENSP00000440643 | 0 | 0.58 |
| PYCARD | TLR6 | 9606.ENSP00000247470 | 9606.ENSP00000389600 | 0.061 | 0.586 |
| PYCARD | TLR8 | 9606.ENSP00000247470 | 9606.ENSP00000312082 | 0.077 | 0.593 |
| PYCARD | TLR2 | 9606.ENSP00000247470 | 9606.ENSP00000260010 | 0.107 | 0.655 |
| PYCARD | SYK | 9606.ENSP00000247470 | 9606.ENSP00000364907 | 0.146 | 0.665 |
| PYCARD | RNASET2 | 9606.ENSP00000247470 | 9606.ENSP00000426455 | 0.116 | 0.907 |
| RAB37 | STK10 | 9606.ENSP00000376390 | 9606.ENSP00000176763 | 0.077 | 0.903 |
| RAB37 | VNN1 | 9606.ENSP00000376390 | 9606.ENSP00000356905 | 0 | 0.9 |
| RAB37 | TRPM2 | 9606.ENSP00000376390 | 9606.ENSP00000381023 | 0.099 | 0.906 |
| RAC2 | SELL | 9606.ENSP00000249071 | 9606.ENSP00000236147 | 0.272 | 0.464 |
| RAC2 | S1PR4 | 9606.ENSP00000249071 | 9606.ENSP00000246115 | 0.329 | 0.407 |
| RAC2 | TLR2 | 9606.ENSP00000249071 | 9606.ENSP00000260010 | 0.119 | 0.406 |
| RAC2 | SEMA4D | 9606.ENSP00000249071 | 9606.ENSP00000416523 | 0.078 | 0.412 |
| RAC2 | TNFAIP8L2 | 9606.ENSP00000249071 | 9606.ENSP00000357906 | 0.161 | 0.462 |
| RAC2 | SRGAP2 | 9606.ENSP00000249071 | 9606.ENSP00000459615 | 0 | 0.942 |
| RAC2 | SYK | 9606.ENSP00000249071 | 9606.ENSP00000364907 | 0.159 | 0.957 |
| RAC2 | VAV1 | 9606.ENSP00000249071 | 9606.ENSP00000472929 | 0.353 | 0.994 |
| RASAL3 | STXBP2 | 9606.ENSP00000341905 | 9606.ENSP00000413606 | 0.114 | 0.725 |
| RPL27A | TRIM66 | 9606.ENSP00000346015 | 9606.ENSP00000384876 | 0.062 | 0.505 |
| RTP4 | STAT1 | 9606.ENSP00000259030 | 9606.ENSP00000354394 | 0.455 | 0.633 |
| RTP4 | XAF1 | 9606.ENSP00000259030 | 9606.ENSP00000354822 | 0.617 | 0.767 |
| RTP4 | SAMD9L | 9606.ENSP00000259030 | 9606.ENSP00000326247 | 0.768 | 0.846 |
| S1PR4 | SELL | 9606.ENSP00000246115 | 9606.ENSP00000236147 | 0.56 | 0.664 |
| S1PR4 | VNN2 | 9606.ENSP00000246115 | 9606.ENSP00000322276 | 0.538 | 0.538 |
| S1PR4 | TNFAIP8L2 | 9606.ENSP00000246115 | 9606.ENSP00000357906 | 0.677 | 0.677 |
| SAMD9L | STXBP2 | 9606.ENSP00000326247 | 9606.ENSP00000413606 | 0 | 0.427 |
| SAMD9L | STAT1 | 9606.ENSP00000326247 | 9606.ENSP00000354394 | 0.782 | 0.824 |
| SAMD9L | XAF1 | 9606.ENSP00000326247 | 9606.ENSP00000354822 | 0.799 | 0.882 |
| SELL | SELPLG | 9606.ENSP00000236147 | 9606.ENSP00000228463 | 0.327 | 0.996 |
| SELL | STAT1 | 9606.ENSP00000236147 | 9606.ENSP00000354394 | 0.061 | 0.429 |
| SELL | SLAMF6 | 9606.ENSP00000236147 | 9606.ENSP00000357036 | 0.225 | 0.443 |
| SELL | VAV1 | 9606.ENSP00000236147 | 9606.ENSP00000472929 | 0.183 | 0.48 |
| SELL | TNFSF13B | 9606.ENSP00000236147 | 9606.ENSP00000365048 | 0.142 | 0.481 |
| SELL | SYK | 9606.ENSP00000236147 | 9606.ENSP00000364907 | 0.174 | 0.499 |
| SELL | TLR6 | 9606.ENSP00000236147 | 9606.ENSP00000389600 | 0.105 | 0.52 |
| SELL | TLR5 | 9606.ENSP00000236147 | 9606.ENSP00000440643 | 0.09 | 0.544 |
| SELL | TNFRSF9 | 9606.ENSP00000236147 | 9606.ENSP00000478699 | 0 | 0.561 |
| SELL | VNN2 | 9606.ENSP00000236147 | 9606.ENSP00000322276 | 0.546 | 0.572 |
| SELL | TLR2 | 9606.ENSP00000236147 | 9606.ENSP00000260010 | 0.176 | 0.627 |
| SELL | TLR8 | 9606.ENSP00000236147 | 9606.ENSP00000312082 | 0.342 | 0.65 |
| SELPLG | TLR2 | 9606.ENSP00000228463 | 9606.ENSP00000260010 | 0.13 | 0.404 |
| SELPLG | TLR8 | 9606.ENSP00000228463 | 9606.ENSP00000312082 | 0.277 | 0.43 |
| SELPLG | SYK | 9606.ENSP00000228463 | 9606.ENSP00000364907 | 0.1 | 0.78 |
| SLA | SYK | 9606.ENSP00000394049 | 9606.ENSP00000364907 | 0.193 | 0.607 |
| SLA | VAV1 | 9606.ENSP00000394049 | 9606.ENSP00000472929 | 0.201 | 0.599 |
| SLAMF6 | VAV1 | 9606.ENSP00000357036 | 9606.ENSP00000472929 | 0.147 | 0.42 |
| STAT1 | UNC93B1 | 9606.ENSP00000354394 | 9606.ENSP00000227471 | 0.09 | 0.469 |
| STAT1 | TLR2 | 9606.ENSP00000354394 | 9606.ENSP00000260010 | 0.064 | 0.819 |
| STAT1 | TLR8 | 9606.ENSP00000354394 | 9606.ENSP00000312082 | 0.061 | 0.762 |
| STAT1 | VDR | 9606.ENSP00000354394 | 9606.ENSP00000447173 | 0 | 0.558 |
| STAT1 | TLR5 | 9606.ENSP00000354394 | 9606.ENSP00000440643 | 0.061 | 0.613 |
| STAT1 | TLR6 | 9606.ENSP00000354394 | 9606.ENSP00000389600 | 0.061 | 0.617 |
| STAT1 | TNFSF13B | 9606.ENSP00000354394 | 9606.ENSP00000365048 | 0.119 | 0.655 |
| STAT1 | SYK | 9606.ENSP00000354394 | 9606.ENSP00000364907 | 0.061 | 0.683 |
| STAT1 | XAF1 | 9606.ENSP00000354394 | 9606.ENSP00000354822 | 0.681 | 0.874 |
| STK10 | TRPM2 | 9606.ENSP00000176763 | 9606.ENSP00000381023 | 0.05 | 0.9 |
| SYK | TLR2 | 9606.ENSP00000364907 | 9606.ENSP00000260010 | 0.23 | 0.74 |
| SYK | TLR8 | 9606.ENSP00000364907 | 9606.ENSP00000312082 | 0.17 | 0.648 |
| SYK | UBASH3A | 9606.ENSP00000364907 | 9606.ENSP00000317327 | 0.09 | 0.634 |
| SYK | TNFSF13B | 9606.ENSP00000364907 | 9606.ENSP00000365048 | 0.139 | 0.566 |
| SYK | TLR5 | 9606.ENSP00000364907 | 9606.ENSP00000440643 | 0.086 | 0.61 |
| SYK | TLR6 | 9606.ENSP00000364907 | 9606.ENSP00000389600 | 0.107 | 0.623 |
| SYK | WIPF1 | 9606.ENSP00000364907 | 9606.ENSP00000376330 | 0.084 | 0.939 |
| SYK | VAV1 | 9606.ENSP00000364907 | 9606.ENSP00000472929 | 0.179 | 0.999 |
| TIGIT | TNFRSF9 | 9606.ENSP00000419085 | 9606.ENSP00000478699 | 0.063 | 0.54 |
| TLR2 | UNC93B1 | 9606.ENSP00000260010 | 9606.ENSP00000227471 | 0.101 | 0.76 |
| TLR2 | TNFRSF9 | 9606.ENSP00000260010 | 9606.ENSP00000478699 | 0.063 | 0.402 |
| TLR2 | VNN2 | 9606.ENSP00000260010 | 9606.ENSP00000322276 | 0.424 | 0.442 |
| TLR2 | VDR | 9606.ENSP00000260010 | 9606.ENSP00000447173 | 0.078 | 0.556 |
| TLR2 | TNFSF13B | 9606.ENSP00000260010 | 9606.ENSP00000365048 | 0.252 | 0.654 |
| TLR2 | TLR8 | 9606.ENSP00000260010 | 9606.ENSP00000312082 | 0.529 | 0.678 |
| TLR2 | TLR5 | 9606.ENSP00000260010 | 9606.ENSP00000440643 | 0.122 | 0.886 |
| TLR2 | TLR6 | 9606.ENSP00000260010 | 9606.ENSP00000389600 | 0.107 | 0.978 |
| TLR5 | UNC93B1 | 9606.ENSP00000440643 | 9606.ENSP00000227471 | 0.062 | 0.746 |
| TLR5 | TLR8 | 9606.ENSP00000440643 | 9606.ENSP00000312082 | 0.139 | 0.439 |
| TLR5 | TNFSF13B | 9606.ENSP00000440643 | 9606.ENSP00000365048 | 0.104 | 0.594 |
| TLR6 | UNC93B1 | 9606.ENSP00000389600 | 9606.ENSP00000227471 | 0.101 | 0.75 |
| TLR6 | TLR8 | 9606.ENSP00000389600 | 9606.ENSP00000312082 | 0.14 | 0.411 |
| TLR6 | TNFSF13B | 9606.ENSP00000389600 | 9606.ENSP00000365048 | 0.084 | 0.555 |
| TLR8 | UNC93B1 | 9606.ENSP00000312082 | 9606.ENSP00000227471 | 0.109 | 0.987 |
| TLR8 | VNN2 | 9606.ENSP00000312082 | 9606.ENSP00000322276 | 0.398 | 0.418 |
| TLR8 | TNFAIP8L2 | 9606.ENSP00000312082 | 9606.ENSP00000357906 | 0.326 | 0.447 |
| TLR8 | TNFSF13B | 9606.ENSP00000312082 | 9606.ENSP00000365048 | 0.212 | 0.635 |
| TNFRSF17 | TNFSF13B | 9606.ENSP00000053243 | 9606.ENSP00000365048 | 0.061 | 0.998 |
| TNFSF13B | TNFSF14 | 9606.ENSP00000365048 | 9606.ENSP00000469049 | 0.076 | 0.939 |
| TRIM14 | TRIM66 | 9606.ENSP00000344208 | 9606.ENSP00000384876 | 0 | 0.455 |
| VNN1 | VNN2 | 9606.ENSP00000356905 | 9606.ENSP00000322276 | 0.165 | 0.915 |
